# Supplementary material for: An organocatalytic domino Michael addition strategy: construction of bispiro[oxindole-thiazolidinone-hexahydroxanthone]s with five contiguous stereocenters
Source: Royal Society of Chemistry journal article supplement (doi:10.1039/d0ob01613f), 2020-01-01
Supplement: d0ob01613f1.pdf [file d0ob01613f1.pdf]

# Organocatalytic domino Michael strategy: construction of bispiro[oxindole-thiazolidinone-hexahydroxanthone]s with five contiguous stereocenters

Yong-Xing Song,<sup>a</sup> Ye Lin,<sup>a</sup> Li Yan,<sup>b</sup> and Da-Ming Du<sup>a,\*</sup>

<sup>a</sup>*School of Chemistry and Chemical Engineering, Beijing Institute of Technology, 5 South Zhongguancun Street, Beijing 100081, People's Republic of China*

E-mail: [dudm@bit.edu.cn](mailto:dudm@bit.edu.cn)

<sup>b</sup>*Analytical and Testing Center, Beijing Institute of Technology Liangxiang Campus, Liangxiang East Road, Beijing 102488, People's Republic of China*

## *Supporting Information*

### **Contents**

|                                                                                       |     |
|---------------------------------------------------------------------------------------|-----|
| 1. General information.....                                                           | S1  |
| 2. Materials.....                                                                     | S1  |
| 3. Procedure for the synthesis of racemates of <b>3</b> .....                         | S1  |
| 4. Procedure of the synthesis of chiral compounds <b>3</b> .....                      | S1  |
| 5. Gram-scale synthesis of <b>3a</b> .....                                            | S19 |
| 6. Procedure and the characterization data of compounds <b>3b</b> and <b>3c</b> ..... | S19 |
| 7. Procedure and the characterization data of compound <b>4</b> .....                 | S21 |
| 8. Procedure and the characterization data of compound <b>5</b> .....                 | S22 |
| 9. References.....                                                                    | S23 |
| 10. Copies of <sup>1</sup> H and <sup>13</sup> C NMR spectra of new compounds.....    | S24 |
| 11. Copies of HPLC chromatograms.....                                                 | S77 |

## 1. General information

Commercially available compounds were used without further purification. Solvents were dried according to standard procedures. Column chromatography was performed with silica gel (200–300 mesh). Melting points were determined with an XT-4 melting-point apparatus and are uncorrected. <sup>1</sup>H NMR spectra were measured with Bruker Ascend 400 MHz spectrometer, chemical shifts were reported in  $\delta$  (ppm) units relative to tetramethylsilane (TMS) as internal standard. <sup>13</sup>C NMR spectra were measured at 100 MHz with 400 MHz spectrometer, chemical shifts are reported in ppm relative to tetramethylsilane and referenced to solvent peak (CDCl<sub>3</sub>,  $\delta$  C = 77.00). High resolution mass spectra (Electron spray ionization) were measured with an Agilent 6520 Accurate-Mass Q-TOF MS system equipped with an electrospray ionization (ESI) source. Optical rotations were measured with a Krüss P8000 polarimeter. Optical rotations were measured with a polarimeter at the indicated concentration with the units of g/100 mL. Enantiomeric excesses were determined by chiral HPLC analysis using an Agilent 1200 LC instrument with a Daicel Chiralpak IB or IC column.

## 2. Materials

**1a–1k** were prepared according to literature reported by Liu and co-workers.<sup>[1]</sup> **2a–2n** were prepared according to the literature.<sup>[2]</sup> The chiral organocatalysts were prepared by following the reported procedures.<sup>[3]</sup>

## 3. Procedure for the synthesis of racemates of **3**

To a dried small bottle were added **2** (0.05 mmol), Et<sub>3</sub>N (1.0 mg, 0.01 mmol, 0.2 equiv) and DCE (0.5 mL). The mixture was stirred at room temperature for 5 min, and **1** (0.06 mmol) was then added. After stirring at room temperature for 48 h, the reaction mixture was concentrated and directly purified by silica gel column chromatography to afford the racemates of **3**.

## 4. Procedure for the synthesis of chiral compounds **3**

To a dried small bottle were added **2** (0.10 mmol), chiral organocatalyst **C6** (3.2 mg, 0.005 mmol, 0.05 equiv) and DCE (1.0 mL). The mixture was stirred at room temperature for 5 min, and **1** (0.12 mmol) was then added. After stirring at room temperature for 48 h, the reaction mixture was concentrated and directly purified by silica gel column chromatography to afford the desired products **3**.

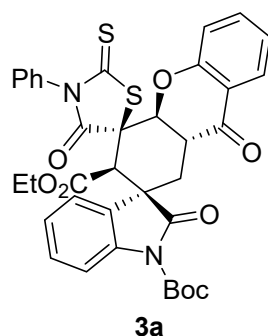

**(3*R*,3'*S*,4'*R*,4*a*'*S*,9*a*'*R*)-1-(*tert*-Butyl) 3'-ethyl 2,4'',9'-trioxo-3''-phenyl-2''-thioxo-4*a*',9*a*'-dihydro-1'*H*,3'*H*,9'*H*-dispiro[indoline-3,2'-xanthene-4',5''-thiazolidine]-1,3'-dicarboxylate (**3a**). From **1a** (47.0 mg, 0.12 mmol) and **2a** (29.3 mg, 0.10 mmol), purified by silica gel (200-300 mesh) column chromatography using dichloromethane/petroleum ether (1/2) as eluent to obtain 62.3 mg (91% yield) compound **3a** as a white solid, m.p. 189–191 °C. HPLC (Daicel Chiralpak IC, *n*-hexane/2-propanol = 90:10, flow rate 1.0 mL/min, detection at 254 nm):  $t_R = 25.9$  min (minor),  $t_R = 29.9$  min (major); >99% ee.  $[\alpha]_D^{25} = +17.1^\circ$  ( $c = 2.15$ , CH<sub>2</sub>Cl<sub>2</sub>). <sup>1</sup>H NMR (400 MHz, CDCl<sub>3</sub>):  $\delta$  7.86 (d,  $J = 8.0$  Hz, 1H, ArH), 7.83 (dd,  $J_1 = 7.6$  Hz,  $J_2 = 1.6$  Hz, 1H, ArH), 7.60–7.50 (m, 4H, ArH), 7.37–7.32 (m, 3H, ArH), 7.20–7.15 (m, 2H, ArH), 7.06 (t,  $J = 8.0$  Hz, 1H, ArH), 6.95 (d,  $J = 8.0$  Hz, 1H, ArH), 4.94 (d,  $J = 14.0$  Hz, 1H, CH), 4.17 (s, 1H, CH), 4.09–3.97 (m, 2H, CH<sub>2</sub>), 3.77–3.70 (m, 1H, CH), 2.63 (dd,  $J_1 = 15.2$  Hz,  $J_2 = 3.6$  Hz, 1H, CH<sub>2</sub>), 1.80 (dd,  $J_1 = 15.2$  Hz,  $J_2 = 12.0$  Hz, 1H, CH<sub>2</sub>), 1.67 (s, 9H, CH<sub>3</sub>), 1.05 (t,  $J = 7.2$  Hz, 3H, CH<sub>3</sub>) ppm. <sup>13</sup>C NMR (100 MHz, CDCl<sub>3</sub>):  $\delta$  202.0, 190.3, 177.3, 176.1, 166.8, 159.5, 148.9, 139.4, 136.5, 135.4, 130.8, 129.7, 129.6, 129.0, 128.0, 127.1, 124.7, 122.5, 121.0, 120.0, 117.7, 115.4, 84.9, 82.7, 65.6, 62.7, 53.1, 47.0, 39.6, 33.7, 28.1, 13.5 ppm. HRMS (ESI):  $m/z$  calcd. for C<sub>36</sub>H<sub>33</sub>N<sub>2</sub>O<sub>8</sub>S<sub>2</sub> [M + H]<sup>+</sup> 685.1673, found 685.1689.**

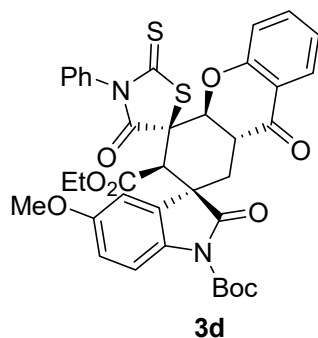

**(3*R*,3'*S*,4'*R*,4*a*'*S*,9*a*'*R*)-1-(*tert*-Butyl) 3'-ethyl 5-methoxy-2,4'',9'-trioxo-3''-phenyl-2''-thioxo-4*a*',9*a*'-dihydro-1'*H*,3'*H*,9'*H*-dispiro[indoline-3,2'-xanthene-4',5''-thiazolidine]-1, 3'-dicarboxylate (3d).** From **1d** (50.6 mg, 0.12 mmol) and **2a** (29.3 mg, 0.10 mmol), purified by silica gel (200-300 mesh) column chromatography using dichloromethane/petroleum ether (1/2) as eluent to obtain 58.6 mg (82% yield) compound **3d** as a white solid, m.p. 192–194 °C. HPLC (Daicel Chiralpak IC, *n*-hexane/ethyl acetate = 90:10, flow rate 1.0 mL/min, detection at 254 nm):  $t_R = 19.8$  min (minor),  $t_R = 22.5$  min (major); 97% ee.  $[\alpha]_D^{25} = +40.2^\circ$  ( $c = 1.66$ ,  $\text{CH}_2\text{Cl}_2$ ).  $^1\text{H NMR}$  (400 MHz,  $\text{CDCl}_3$ ):  $\delta$  7.84 (dd,  $J_1 = 7.6$  Hz,  $J_2 = 1.6$  Hz, 1H, ArH), 7.78 (d,  $J = 9.2$  Hz, 1H, ArH), 7.60–7.56 (m, 2H, ArH), 7.54–7.50 (m, 2H, ArH), 7.33 (d,  $J = 7.2$  Hz, 2H, ArH), 7.07 (t,  $J = 7.8$  Hz, 1H, ArH), 6.95 (d,  $J = 8.0$  Hz, 1H, ArH), 6.85 (dd,  $J_1 = 9.0$  Hz,  $J_2 = 2.6$  Hz, 1H, ArH), 6.73 (d,  $J = 2.4$  Hz, 1H, ArH), 4.94 (d,  $J = 14.0$  Hz, 1H, CH), 4.13 (s, 1H, CH), 4.12–4.01 (m, 2H,  $\text{CH}_2$ ), 3.80 (s, 3H,  $\text{OCH}_3$ ), 3.76–3.69 (m, 1H, CH), 2.63 (dd,  $J_1 = 15.2$  Hz,  $J_2 = 3.6$  Hz, 1H,  $\text{CH}_2$ ), 1.77 (dd,  $J_1 = 15.2$  Hz,  $J_2 = 12.0$  Hz, 1H,  $\text{CH}_2$ ), 1.66 (s, 9H,  $\text{CH}_3$ ), 1.08 (t,  $J = 7.2$  Hz, 3H,  $\text{CH}_3$ ) ppm.  $^{13}\text{C NMR}$  (100 MHz,  $\text{CDCl}_3$ ):  $\delta$  202.1, 190.4, 177.4, 176.1, 166.8, 159.5, 157.1, 148.9, 136.6, 135.4, 132.7, 132.1, 129.7, 129.6, 128.1, 127.1, 122.5, 120.0, 117.7, 116.4, 113.4, 107.7, 84.7, 82.7, 65.6, 62.8, 55.7, 53.1, 47.3, 39.6, 33.8, 28.1, 13.6 ppm. HRMS (ESI):  $m/z$  calcd. for  $\text{C}_{37}\text{H}_{35}\text{N}_2\text{O}_9\text{S}_2$   $[\text{M} + \text{H}]^+$  715.1786, found 715.1778.

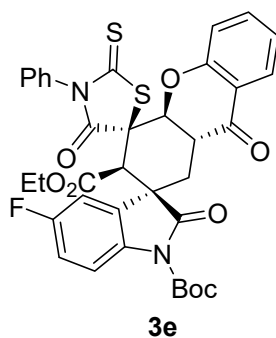

**(3*R*,3'*S*,4'*R*,4*a*'*S*,9*a*'*R*)-1-(*tert*-Butyl) 3'-ethyl 5-fluoro-2,4'',9'-trioxo-3''-phenyl-2''-thioxo-4*a*',9*a*'-dihydro-1'*H*,3'*H*,9'*H*-dispiro[indoline-3,2'-xanthene-4',5''-thiazolidine]-1,3'-dicarboxylate (3e).** From **1e** (49.1 mg, 0.12 mmol) and **2a** (29.3 mg, 0.10 mmol), purified by silica gel (200-300 mesh) column chromatography using dichloromethane/petroleum ether (1/2) as eluent to obtain 60.4 mg (86% yield) compound **3e** as a white solid, m.p. 191–192 °C. HPLC (Daicel Chiralpak IC, *n*-hexane/ethyl acetate = 90:10, flow rate 1.0 mL/min, detection at 254 nm):  $t_R = 12.3$  min (minor),  $t_R = 14.6$  min (major); 94% ee.  $[\alpha]_D^{25} = +11.3^\circ$  ( $c = 2.10$ , CH<sub>2</sub>Cl<sub>2</sub>). <sup>1</sup>H NMR (400 MHz, CDCl<sub>3</sub>):  $\delta$  7.86 (dd,  $J_1 = 8.8$  Hz,  $J_2 = 4.4$  Hz, 1H, ArH), 7.82 (dd,  $J_1 = 8.0$  Hz,  $J_2 = 1.6$  Hz, 1H, ArH), 7.59–7.55 (m, 2H, ArH), 7.51–7.45 (m, 2H, ArH), 7.30 (d,  $J = 7.2$  Hz, 2H, ArH), 7.07–7.00 (m, 2H, ArH), 6.92 (dd,  $J_1 = 7.4$  Hz,  $J_2 = 2.6$  Hz, 1H, ArH), 6.87 (d,  $J = 8.4$  Hz, 1H, ArH), 4.93 (d,  $J = 13.6$  Hz, 1H, CH), 4.19 (s, 1H, CH), 4.15–4.02 (m, 2H, CH<sub>2</sub>), 3.72–3.65 (m, 1H, CH), 2.56 (dd,  $J_1 = 15.2$  Hz,  $J_2 = 3.6$  Hz, 1H, CH<sub>2</sub>), 1.74 (dd,  $J_1 = 15.0$  Hz,  $J_2 = 11.8$  Hz, 1H, CH<sub>2</sub>), 1.66 (s, 9H, CH<sub>3</sub>), 1.10 (t,  $J = 7.0$  Hz, 3H, CH<sub>3</sub>) ppm. <sup>13</sup>C NMR (100 MHz, CDCl<sub>3</sub>):  $\delta$  201.8, 190.1, 177.4, 175.7, 166.8, 159.9 (d,  $^1J_{C-F} = -243.0$  Hz), 159.3, 148.8, 136.6, 135.3, 132.6 (d,  $^3J_{C-F} = 7.5$  Hz), 129.74, 129.67, 128.0, 127.1, 122.5, 119.8, 117.6, 121.0, 116.8 (d,  $^3J_{C-F} = 7.7$  Hz), 115.4 (d,  $^2J_{C-F} = 22.5$  Hz), 109.1 (d,  $^2J_{C-F} = 24.7$  Hz), 85.1, 82.5, 65.6, 62.9, 52.8, 47.4, 39.4, 33.4, 28.1, 13.6 ppm. <sup>19</sup>F NMR (376 MHz, CDCl<sub>3</sub>):  $\delta$  -116.5 ppm. HRMS (ESI):  $m/z$  calcd. for C<sub>36</sub>H<sub>32</sub>FN<sub>2</sub>O<sub>8</sub>S<sub>2</sub> [M + H]<sup>+</sup> 703.1579, found 703.1578.

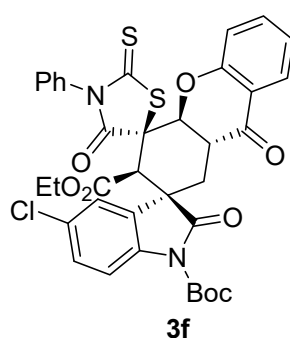

**(3*R*,3'*S*,4'*R*,4*a*'*S*,9*a*'*R*)-1-(*tert*-Butyl) 3'-ethyl 5-chloro-2,4'',9'-trioxo-3''-phenyl-2''-thioxo-4*a*',9*a*'-dihydro-1'*H*,3'*H*,9'*H*-dispiro[indoline-3,2'-xanthene-4',5''-thiazolidine]-1,3'-dicarboxylate (3f).** From **1f** (51.1 mg, 0.12 mmol) and **2a** (29.3 mg, 0.10 mmol), purified by silica gel (200-300 mesh) column chromatography using dichloromethane/petroleum ether (1/2) as eluent to obtain 66.2 mg (92% yield) compound **3f** as a light yellow solid, m.p.

194–196 °C. HPLC (Daicel Chiralpak IC, *n*-hexane/ethyl acetate = 90:10, flow rate 1.0 mL/min, detection at 254 nm):  $t_R$  = 11.1 min (minor),  $t_R$  = 12.7 min (major); 93% ee.  $[\alpha]_D^{25}$  = +40.9° ( $c$  = 2.33, CH<sub>2</sub>Cl<sub>2</sub>). <sup>1</sup>H NMR (400 MHz, CDCl<sub>3</sub>):  $\delta$  7.84–7.81 (m, 2H, ArH), 7.60–7.56 (m, 2H, ArH), 7.52–7.46 (m, 2H, ArH), 7.33–7.30 (m, 3H, ArH), 7.17 (d,  $J$  = 2.0 Hz, 1H, ArH), 7.05 (t,  $J$  = 8.0 Hz, 1H, ArH), 6.89 (d,  $J$  = 8.0 Hz, 1H, ArH), 4.92 (d,  $J$  = 13.6 Hz, 1H, CH), 4.19 (s, 1H, CH), 4.15–4.02 (m, 2H, CH<sub>2</sub>), 3.71–3.64 (m, 1H, CH), 2.57 (dd,  $J_1$  = 15.0 Hz,  $J_2$  = 3.4 Hz, 1H, CH<sub>2</sub>), 1.74 (dd,  $J_1$  = 15.0 Hz,  $J_2$  = 11.8 Hz, 1H, CH<sub>2</sub>), 1.66 (s, 9H, CH<sub>3</sub>), 1.10 (t,  $J$  = 7.2 Hz, 3H, CH<sub>3</sub>) ppm. <sup>13</sup>C NMR (100 MHz, CDCl<sub>3</sub>):  $\delta$  201.8, 190.1, 177.3, 175.4, 166.7, 159.3, 148.7, 138.0, 136.6, 135.3, 132.6, 130.1, 129.73, 129.67, 129.0, 128.0, 127.1, 122.5, 121.7, 119.8, 117.6, 116.6, 85.2, 82.4, 65.6, 62.9, 52.9, 47.2, 39.4, 33.4, 28.0, 13.6 ppm. HRMS (ESI):  $m/z$  calcd. for C<sub>36</sub>H<sub>32</sub>ClN<sub>2</sub>O<sub>8</sub>S<sub>2</sub> [M + H]<sup>+</sup> 719.1283, found 719.1298.

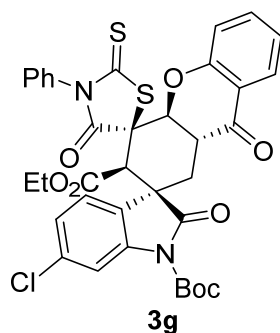

**(3*R*,3'*S*,4'*R*,4*a*'*S*,9*a*'*R*)-1-(*tert*-Butyl) 3'-ethyl 6-chloro-2,4'',9'-trioxo-3''-phenyl-2''-thioxo-4*a*',9*a*'-dihydro-1*H*,3'*H*,9'*H*-dispiro[indoline-3,2'-xanthene-4',5''-thiazolidine]-1,3'-dicarboxylate (3g).** From **1g** (51.1 mg, 0.12 mmol) and **2a** (29.3 mg, 0.10 mmol), purified by silica gel (200-300 mesh) column chromatography using dichloromethane/petroleum ether (1/2) as eluent to obtain 67.6 mg (94% yield) compound **3g** as a light yellow solid, m.p. 193–195 °C. HPLC (Daicel Chiralpak IC, *n*-hexane/ethyl acetate = 90:10, flow rate 1.0 mL/min, detection at 254 nm):  $t_R$  = 14.2 min (minor),  $t_R$  = 19.8 min (major); 86% ee.  $[\alpha]_D^{25}$  = +14.3° ( $c$  = 2.35, CH<sub>2</sub>Cl<sub>2</sub>). <sup>1</sup>H NMR (400 MHz, CDCl<sub>3</sub>):  $\delta$  7.95 (d,  $J$  = 2.0 Hz, 1H, ArH), 7.82 (dd,  $J_1$  = 8.0 Hz,  $J_2$  = 1.6 Hz, 1H, ArH), 7.60–7.56 (m, 2H, ArH), 7.54–7.50 (m, 2H, ArH), 7.32 (d,  $J$  = 7.2 Hz, 2H, ArH), 7.16 (dd,  $J_1$  = 8.0 Hz,  $J_2$  = 2.0 Hz, 1H, ArH), 7.12–7.05 (m, 2H, ArH), 6.95 (d,  $J$  = 8.4 Hz, 1H, ArH), 4.92 (d,  $J$  = 13.6 Hz, 1H, CH), 4.14 (s, 1H, CH), 4.11–4.02 (m, 2H, CH<sub>2</sub>), 3.73–3.66 (m, 1H, CH), 2.61 (dd,  $J_1$  = 15.2 Hz,  $J_2$  = 3.6 Hz, 1H, CH<sub>2</sub>), 1.77 (dd,  $J_1$  = 15.0 Hz,  $J_2$  = 12.0 Hz, 1H, CH<sub>2</sub>), 1.67 (s, 9H, CH<sub>3</sub>), 1.09 (t,  $J$  = 7.2 Hz,

3H, CH<sub>3</sub>) ppm. <sup>13</sup>C NMR (100 MHz, CDCl<sub>3</sub>): δ 201.7, 190.2, 177.2, 175.5, 166.7, 159.4, 148.6, 140.4, 136.6, 135.3, 134.8, 129.7, 129.6, 129.2, 128.0, 127.1, 124.7, 122.5, 122.0, 119.9, 117.7, 116.2, 85.4, 82.5, 65.5, 62.9, 53.0, 46.9, 39.5, 33.5, 28.0, 13.6 ppm. HRMS (ESI): *m/z* calcd. for C<sub>36</sub>H<sub>32</sub>ClN<sub>2</sub>O<sub>8</sub>S<sub>2</sub> [M + H]<sup>+</sup> 719.1283, found 719.1285.

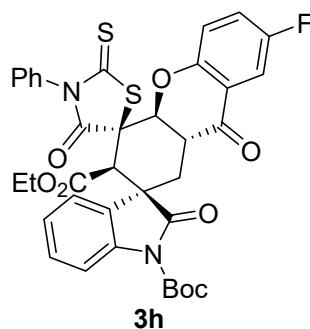

**(3*R*,3'*S*,4'*R*,4*a*'*S*,9*a*'*R*)-1-(*tert*-Butyl) 3'-ethyl 7'-fluoro-2,4'',9'-trioxo-3''-phenyl-2''-thioxo-4*a*',9*a*'-dihydro-1*H*,3'*H*,9'*H*-dispiro[indoline-3,2'-xanthene-4',5''-thiazolidine]-1,3'-dicarboxylate (3h).** From **1h** (49.1 mg, 0.12 mmol) and **2a** (29.3 mg, 0.10 mmol), purified by silica gel (200-300 mesh) column chromatography using dichloromethane/petroleum ether (1/2) as eluent to obtain 66.1 mg (94% yield) compound **3h** as a light yellow solid, m.p. 185–187 °C. HPLC (Daicel Chiralpak IC, *n*-hexane/ethyl acetate = 90:10, flow rate 1.0 mL/min, detection at 254 nm): *t<sub>R</sub>* = 14.1 min (minor), *t<sub>R</sub>* = 24.1 min (major); 85% ee. [α]<sub>D</sub><sup>25</sup> = +19.0° (*c* = 2.21, CH<sub>2</sub>Cl<sub>2</sub>). <sup>1</sup>H NMR (400 MHz, CDCl<sub>3</sub>): δ 7.86 (d, *J* = 8.4 Hz, 1H, ArH), 7.60–7.56 (m, 2H, ArH), 7.54–7.51 (m, 1H, ArH), 7.48 (dd, *J*<sub>1</sub> = 8.0 Hz, *J*<sub>2</sub> = 3.2 Hz, 1H, ArH), 7.37–7.31 (m, 3H, ArH), 7.27–7.22 (m, 1H, ArH), 7.18 (d, *J* = 4.4 Hz, 2H, ArH), 6.95 (dd, *J*<sub>1</sub> = 9.2 Hz, *J*<sub>2</sub> = 4.0 Hz, 1H, ArH), 4.93 (d, *J* = 14.0 Hz, 1H, CH), 4.17 (s, 1H, CH), 4.09–3.99 (m, 2H, CH<sub>2</sub>), 3.76–3.69 (m, 1H, CH), 2.62 (dd, *J*<sub>1</sub> = 15.2 Hz, *J*<sub>2</sub> = 3.6 Hz, 1H, CH<sub>2</sub>), 1.79 (dd, *J*<sub>1</sub> = 15.2 Hz, *J*<sub>2</sub> = 12.0 Hz, 1H, CH<sub>2</sub>), 1.67 (s, 9H, CH<sub>3</sub>), 1.05 (t, *J* = 7.2 Hz, 3H, CH<sub>3</sub>) ppm. <sup>13</sup>C NMR (100 MHz, CDCl<sub>3</sub>): δ 201.8, 189.7, 177.2, 176.1, 166.8, 157.7 (d, <sup>1</sup>*J*<sub>C-F</sub> = -242.5 Hz), 155.7, 148.8, 139.4, 135.3, 130.6, 129.7, 129.6, 129.1, 128.0, 124.8, 124.1 (d, <sup>2</sup>*J*<sub>C-F</sub> = 24.5 Hz), 121.1, 120.4 (d, <sup>3</sup>*J*<sub>C-F</sub> = 6.6 Hz), 119.5 (d, <sup>3</sup>*J*<sub>C-F</sub> = 7.3 Hz), 115.4, 112.2 (d, <sup>2</sup>*J*<sub>C-F</sub> = 23.4 Hz), 85.0, 82.9, 65.5, 62.8, 53.2, 47.0, 39.5, 33.6, 28.1, 13.5 ppm. <sup>19</sup>F NMR (376 MHz, CDCl<sub>3</sub>): δ -119.4 ppm. HRMS (ESI): *m/z* calcd. for C<sub>36</sub>H<sub>32</sub>FN<sub>2</sub>O<sub>8</sub>S<sub>2</sub> [M + H]<sup>+</sup> 703.1579, found 703.1587.

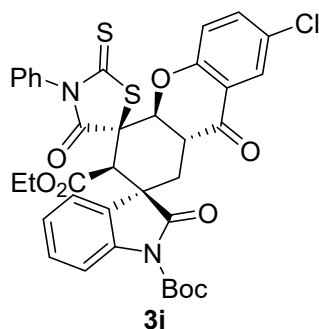

**(3*R*,3'*S*,4'*R*,4*a*'*S*,9*a*'*R*)-1-(*tert*-Butyl) 3'-ethyl 7'-chloro-2,4'',9'-trioxo-3''-phenyl-2''-thioxo-4*a*',9*a*'-dihydro-1'*H*,3'*H*,9'*H*-dispiro[indoline-3,2'-xanthene-4',5''-thiazolidine]-1,3'-dicarboxylate (3i).** From **1i** (51.1 mg, 0.12 mmol) and **2a** (29.3 mg, 0.10 mmol), purified by silica gel (200-300 mesh) column chromatography using dichloromethane/petroleum ether (1/2) as eluent to obtain 69.0 mg (96% yield) compound **3i** as a light yellow solid, m.p. 195–197 °C. HPLC (Daicel Chiralpak IC, *n*-hexane/ethyl acetate = 90:10, flow rate 1.0 mL/min, detection at 254 nm):  $t_R$  = 14.4 min (minor),  $t_R$  = 22.6 min (major); 81% ee.  $[\alpha]_D^{25} = +24.8^\circ$  ( $c = 2.37$ ,  $\text{CH}_2\text{Cl}_2$ ).  $^1\text{H NMR}$  (400 MHz,  $\text{CDCl}_3$ ):  $\delta$  7.86 (d,  $J = 8.0$  Hz, 1H, ArH), 7.78 (d,  $J = 2.8$  Hz, 1H, ArH), 7.59–7.55 (m, 2H, ArH), 7.53–7.49 (m, 1H, ArH), 7.45 (dd,  $J_1 = 8.8$  Hz,  $J_2 = 2.4$  Hz, 1H, ArH), 7.37–7.30 (m, 3H, ArH), 7.17 (d,  $J = 4.4$  Hz, 2H, ArH), 6.91 (d,  $J = 8.8$  Hz, 1H, ArH), 4.94 (d,  $J = 14.0$  Hz, 1H, CH), 4.17 (s, 1H, CH), 4.08–3.99 (m, 2H,  $\text{CH}_2$ ), 3.76–3.69 (m, 1H, CH), 2.61 (dd,  $J_1 = 15.2$  Hz,  $J_2 = 3.2$  Hz, 1H,  $\text{CH}_2$ ), 1.79 (dd,  $J_1 = 15.2$  Hz,  $J_2 = 12.0$  Hz, 1H,  $\text{CH}_2$ ), 1.67 (s, 9H,  $\text{CH}_3$ ), 1.05 (t,  $J = 7.2$  Hz, 3H,  $\text{CH}_3$ ) ppm.  $^{13}\text{C NMR}$  (100 MHz,  $\text{CDCl}_3$ ):  $\delta$  201.7, 189.3, 177.2, 176.1, 166.8, 157.9, 148.8, 139.4, 136.4, 135.3, 130.6, 129.7, 129.6, 129.1, 128.1, 128.0, 126.4, 124.8, 121.1, 120.7, 119.4, 115.4, 85.0, 82.8, 65.5, 62.8, 53.2, 47.0, 39.5, 33.5, 28.1, 13.5 ppm. HRMS (ESI):  $m/z$  calcd. for  $\text{C}_{36}\text{H}_{32}\text{ClN}_2\text{O}_8\text{S}_2$   $[\text{M} + \text{H}]^+$  719.1283, found 719.1300.

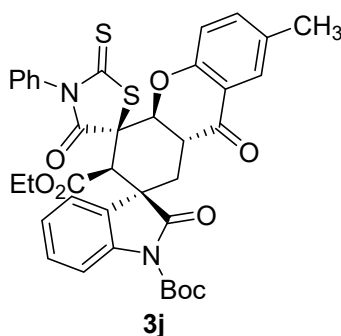



**(3R,3'S,4'R,4a'S,9a'R)-1-(tert-Butyl) 3'-ethyl 7'-methyl-2,4'',9'-trioxo-3''-phenyl-2''-thioxo-4a',9a'-dihydro-1'H,3'H,9'H-dispiro[indoline-3,2'-xanthene-4',5''-thiazolidine]-1, 3'-dicarboxylate (3j).** From **1j** (48.6 mg, 0.12 mmol) and **2a** (29.3 mg, 0.10 mmol), purified by silica gel (200-300 mesh) column chromatography using dichloromethane/petroleum ether (1/2) as eluent to obtain 65.0 mg (93% yield) compound **3j** as a light yellow solid, m.p. 184–186 °C. HPLC (Daicel Chiralpak IC, *n*-hexane/ethyl acetate = 90:10, flow rate 1.0 mL/min, detection at 254 nm):  $t_R$  = 15.7 min (minor),  $t_R$  = 21.2 min (major); 87% ee.  $[\alpha]_D^{25} = +21.7^\circ$  ( $c = 2.09$ , CH<sub>2</sub>Cl<sub>2</sub>). <sup>1</sup>H NMR (400 MHz, CDCl<sub>3</sub>):  $\delta$  7.86 (d,  $J = 8.4$  Hz, 1H, ArH), 7.62–7.56 (m, 3H, ArH), 7.54–7.51 (m, 1H, ArH), 7.36–7.31 (m, 4H, ArH), 7.20–7.17 (m, 2H, ArH), 6.85 (d,  $J = 8.4$  Hz, 1H, ArH), 4.90 (d,  $J = 13.6$  Hz, 1H, CH), 4.16 (s, 1H, CH), 4.09–3.98 (m, 2H, CH<sub>2</sub>), 3.74–3.67 (m, 1H, CH), 2.63 (dd,  $J_1 = 15.2$  Hz,  $J_2 = 3.2$  Hz, 1H, CH<sub>2</sub>), 2.30 (s, 3H, CH<sub>3</sub>), 1.78 (dd,  $J_1 = 15.2$  Hz,  $J_2 = 11.6$  Hz, 1H, CH<sub>2</sub>), 1.67 (s, 9H, CH<sub>3</sub>), 1.05 (t,  $J = 7.2$  Hz, 3H, CH<sub>3</sub>) ppm. <sup>13</sup>C NMR (100 MHz, CDCl<sub>3</sub>):  $\delta$  202.1, 190.6, 177.3, 176.1, 166.9, 157.6, 148.9, 139.4, 137.6, 135.4, 132.0, 130.8, 129.7, 129.6, 129.0, 128.1, 126.7, 124.7, 121.0, 119.6, 117.5, 115.4, 84.9, 82.7, 65.6, 62.7, 53.1, 47.1, 39.6, 33.8, 28.1, 20.4, 13.6 ppm. HRMS (ESI):  $m/z$  calcd. for C<sub>37</sub>H<sub>35</sub>N<sub>2</sub>O<sub>8</sub>S<sub>2</sub> [M + H]<sup>+</sup> 699.1829, found 699.1837.

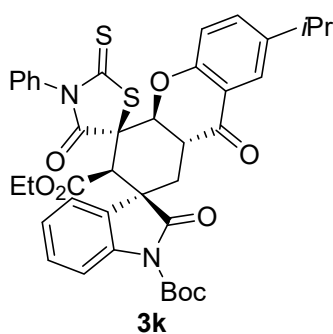

**(3R,3'S,4'R,4a'S,9a'R)-1-(tert-Butyl) 3'-ethyl 7'-isopropyl-2,4'',9'-trioxo-3''-phenyl-2''-thioxo-4a',9a'-dihydro-1'H,3'H,9'H-dispiro[indoline-3,2'-xanthene-4',5''-thiazolidine]-1, 3'-dicarboxylate (3k).** From **1k** (52.0 mg, 0.12 mmol) and **2a** (29.3 mg, 0.10 mmol), purified by silica gel (200-300 mesh) column chromatography using dichloromethane/petroleum ether (1/2) as eluent to obtain 71.0 mg (98% yield) compound **3k** as a light yellow solid, m.p. 200–202 °C. HPLC (Daicel Chiralpak IB, *n*-hexane/ethyl acetate = 85:15, flow rate 1.0 mL/min, detection at 254 nm):  $t_R$  = 8.5 min (minor),  $t_R$  = 14.0 min

(major); 88% ee.  $[\alpha]_{\text{D}}^{25} = +24.4^{\circ}$  ( $c = 2.45$ ,  $\text{CH}_2\text{Cl}_2$ ).  $^1\text{H}$  NMR (400 MHz,  $\text{CDCl}_3$ ):  $\delta$  7.86 (d,  $J = 8.0$  Hz, 1H, ArH), 7.69 (d,  $J = 2.4$  Hz, 1H, ArH), 7.60–7.56 (m, 2H, ArH), 7.54–7.50 (m, 1H, ArH), 7.41 (dd,  $J_1 = 8.8$  Hz,  $J_2 = 2.4$  Hz, 1H, ArH), 7.37–7.32 (m, 3H, ArH), 7.19–7.18 (m, 2H, ArH), 6.91 (d,  $J = 8.8$  Hz, 1H, ArH), 4.91 (d,  $J = 13.6$  Hz, 1H, CH), 4.16 (s, 1H, CH), 4.10–3.98 (m, 2H,  $\text{CH}_2$ ), 3.75–3.68 (m, 1H, CH), 2.92–2.85 (m, 1H, CH), 2.65 (dd,  $J_1 = 15.0$  Hz,  $J_2 = 3.4$  Hz, 1H,  $\text{CH}_2$ ), 1.78 (dd,  $J_1 = 15.2$  Hz,  $J_2 = 12.0$  Hz, 1H,  $\text{CH}_2$ ), 1.67 (s, 9H,  $\text{CH}_3$ ), 1.22 (d,  $J = 6.8$  Hz, 6H,  $\text{CH}_3$ ), 1.06 (t,  $J = 7.2$  Hz, 3H,  $\text{CH}_3$ ) ppm.  $^{13}\text{C}$  NMR (100 MHz,  $\text{CDCl}_3$ ):  $\delta$  202.1, 190.6, 177.3, 176.1, 166.9, 157.8, 148.9, 143.1, 139.4, 135.4, 135.3, 130.8, 129.7, 129.5, 129.0, 128.1, 124.7, 124.1, 121.0, 119.7, 117.6, 115.4, 84.9, 82.7, 65.6, 62.7, 53.1, 47.1, 39.6, 33.8, 33.3, 28.1, 23.81, 23.77, 13.6 ppm. HRMS (ESI):  $m/z$  calcd. for  $\text{C}_{39}\text{H}_{39}\text{N}_2\text{O}_8\text{S}_2$   $[\text{M} + \text{H}]^+$  727.2142, found 727.2157.

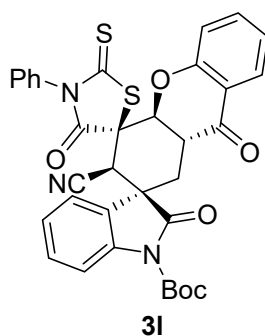

**(3R,3'S,4'R,4a'S,9a'R)-tert-Butyl 3'-cyano-2,4'',9'-trioxo-3''-phenyl-2''-thioxo-4a',9a'-dihydro-1'H,3'H,9'H-dispiro[indoline-3,2'-xanthene-4',5''-thiazolidine]-1-carboxylate (3I).** From **1a** (47.0 mg, 0.12 mmol) and **2b** (24.6 mg, 0.10 mmol), purified by silica gel (200-300 mesh) column chromatography using dichloromethane/petroleum ether (1/2) as eluent to obtain 52.3 mg (82% yield) compound **3I** as a light yellow solid, m.p. 247–249 °C. HPLC (Daicel Chiralpak IC, *n*-hexane/ethyl acetate = 90:10, flow rate 1.0 mL/min, detection at 254 nm):  $t_{\text{R}} = 12.8$  min (minor),  $t_{\text{R}} = 25.2$  min (major); 92% ee.  $[\alpha]_{\text{D}}^{25} = +36.9^{\circ}$  ( $c = 0.85$ ,  $\text{CH}_2\text{Cl}_2$ ).  $^1\text{H}$  NMR (400 MHz,  $\text{CDCl}_3$ ):  $\delta$  7.93 (d,  $J = 8.0$  Hz, 1H, ArH), 7.86 (dd,  $J_1 = 7.8$  Hz,  $J_2 = 1.4$  Hz, 1H, ArH), 7.59–7.53 (m, 4H, ArH), 7.48–7.43 (m, 1H, ArH), 7.30–7.25 (m, 4H, ArH), 7.11 (t,  $J = 8.0$  Hz, 1H, ArH), 6.99 (d,  $J = 8.0$  Hz, 1H, ArH), 4.89 (d,  $J = 13.6$  Hz, 1H, CH), 4.03 (s, 1H, CH), 3.94–3.87 (m, 1H, CH), 2.78 (dd,  $J_1 = 15.4$  Hz,  $J_2 = 3.8$  Hz, 1H,  $\text{CH}_2$ ), 1.90 (dd,  $J_1 = 15.4$  Hz,  $J_2 = 11.8$  Hz, 1H,  $\text{CH}_2$ ), 1.68 (s, 9H,  $\text{CH}_3$ ) ppm.  $^{13}\text{C}$  NMR (100 MHz,  $\text{CDCl}_3$ ):  $\delta$  199.8, 189.8, 175.6, 173.7, 159.2, 148.2, 139.5, 136.9, 134.8, 130.8, 130.1, 129.8,

128.2, 127.3, 126.8, 125.7, 122.9, 122.1, 120.0, 117.8, 116.1, 113.2, 85.9, 81.4, 65.4, 47.9, 42.3, 40.0, 32.3, 28.1 ppm. HRMS (ESI):  $m/z$  calcd. for  $C_{34}H_{28}N_3O_6S_2$   $[M + H]^+$  638.1414, found 638.1420.

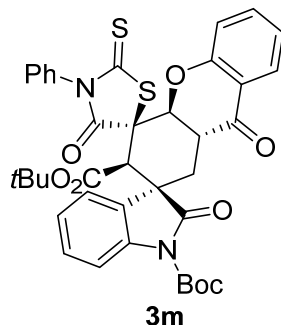

**(3*R*,3'*S*,4'*R*,4*a*'*S*,9*a*'*R*)-Di-*tert*-butyl 2,4'',9'-trioxo-3''-phenyl-2''-thioxo-4*a*',9*a*'-dihydro-1'*H*,3'*H*,9'*H*-dispiro[indoline-3,2'-xanthene-4',5''-thiazolidine]-1,3'-dicarboxylate (3*m*).**

From **1a** (47.0 mg, 0.12 mmol) and **2c** (32.1 mg, 0.10 mmol), purified by silica gel (200-300 mesh) column chromatography using dichloromethane/petroleum ether (1/2) as eluent to obtain 70.1 mg (98% yield) compound **3m** as a light yellow solid, m.p. 154–156 °C. HPLC (Daicel Chiralpak IC, *n*-hexane/ethyl acetate = 90:10, flow rate 1.0 mL/min, detection at 254 nm):  $t_R$  = 11.1 min (minor),  $t_R$  = 15.5 min (major); 86% ee.  $[\alpha]_D^{25}$  = +13.6° ( $c$  = 2.59,  $CH_2Cl_2$ ).  $^1H$  NMR (400 MHz,  $CDCl_3$ ):  $\delta$  7.88 (d,  $J$  = 8.0 Hz, 1H, ArH), 7.84 (dd,  $J_1$  = 7.8 Hz,  $J_2$  = 1.8 Hz, 1H, ArH), 7.59–7.49 (m, 4H, ArH), 7.38–7.33 (m, 3H, ArH), 7.21–7.17 (m, 2H, ArH), 7.06 (t,  $J$  = 7.6 Hz, 1H, ArH), 6.97 (d,  $J$  = 8.4 Hz, 1H, ArH), 4.97 (d,  $J$  = 14.0 Hz, 1H, CH), 4.03 (s, 1H, CH), 3.79–3.72 (m, 1H, CH), 2.63 (dd,  $J_1$  = 15.2 Hz,  $J_2$  = 3.6 Hz, 1H,  $CH_2$ ), 1.78 (dd,  $J_1$  = 15.0 Hz,  $J_2$  = 11.8 Hz, 1H,  $CH_2$ ), 1.66 (s, 9H,  $CH_3$ ), 1.17 (s, 9H,  $CH_3$ ) ppm.  $^{13}C$  NMR (100 MHz,  $CDCl_3$ ):  $\delta$  202.2, 190.6, 177.4, 175.7, 165.9, 159.6, 149.0, 139.3, 136.5, 135.6, 130.8, 129.6, 129.5, 129.0, 128.2, 127.1, 124.8, 122.4, 121.1, 120.0, 117.8, 115.2, 85.0, 84.8, 82.4, 66.0, 54.3, 46.9, 39.8, 33.7, 28.1, 27.2 ppm. HRMS (ESI):  $m/z$  calcd. for  $C_{38}H_{37}N_2O_8S_2$   $[M + H]^+$  713.1986, found 713.1992.

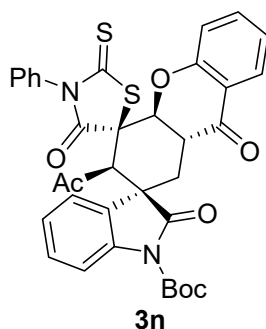

**(3*R*,3'*S*,4'*R*,4*a*'*S*,9*a*'*R*)-tert-Butyl 3'-acetyl-2,4'',9'-trioxo-3''-phenyl-2''-thioxo-4*a*',9*a*'-dihydro-1*H*,3'*H*,9'*H*-dispiro[indoline-3,2'-xanthene-4',5''-thiazolidine]-1-carboxylate**

**(3n).** From **1a** (47.0 mg, 0.12 mmol) and **2d** (26.2 mg, 0.10 mmol), purified by silica gel (200-300 mesh) column chromatography using dichloromethane/petroleum ether (1/2) as eluent to obtain 53.7 mg (82% yield) compound **3n** as a light yellow solid, m.p. 198–199 °C. HPLC (Daicel Chiralpak IC, *n*-hexane/ethyl acetate = 90:10, flow rate 1.0 mL/min, detection at 254 nm):  $t_R$  = 18.7 min (minor),  $t_R$  = 24.5 min (major); 99% ee.  $[\alpha]_D^{25}$  = +22.5° ( $c$  = 1.38, CH<sub>2</sub>Cl<sub>2</sub>). <sup>1</sup>H NMR (400 MHz, CDCl<sub>3</sub>):  $\delta$  7.89–7.84 (m, 2H, ArH), 7.62–7.53 (m, 4H, ArH), 7.36–7.32 (m, 1H, ArH), 7.27–7.25 (m, 2H, ArH), 7.19–7.15 (m, 2H, ArH), 7.09 (t,  $J$  = 8.0 Hz, 1H, ArH), 6.98 (d,  $J$  = 8.0 Hz, 1H, ArH), 4.96 (d,  $J$  = 14.0 Hz, 1H, CH), 4.21 (s, 1H, CH), 3.84–3.78 (m, 1H, CH), 2.61 (dd,  $J_1$  = 15.0 Hz,  $J_2$  = 3.4 Hz, 1H, CH<sub>2</sub>), 2.00 (s, 3H, CH<sub>3</sub>), 1.80 (dd,  $J_1$  = 15.2 Hz,  $J_2$  = 11.6 Hz, 1H, CH<sub>2</sub>), 1.68 (s, 9H, CH<sub>3</sub>) ppm. <sup>13</sup>C NMR (100 MHz, CDCl<sub>3</sub>):  $\delta$  201.4, 200.3, 190.4, 177.7, 176.3, 159.4, 148.9, 139.5, 136.6, 135.1, 130.2, 130.0, 129.8, 129.3, 128.0, 127.2, 124.7, 122.6, 120.8, 120.0, 117.7, 115.8, 84.9, 83.5, 64.9, 60.0, 46.8, 39.7, 33.5, 29.9, 28.1 ppm. HRMS (ESI):  $m/z$  calcd. for C<sub>35</sub>H<sub>30</sub>N<sub>2</sub>O<sub>7</sub>S<sub>2</sub>Na [M + Na]<sup>+</sup> 677.1387, found 677.1398.

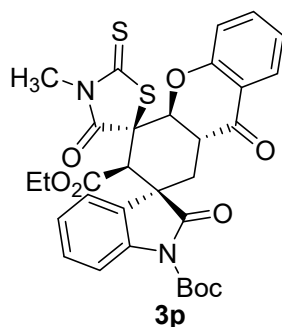

**(3*R*,3'*S*,4'*R*,4*a*'*S*,9*a*'*R*)-1-(tert-Butyl) 3'-ethyl 3''-methyl-2,4'',9'-trioxo-2''-thioxo-4*a*',9*a*'-dihydro-1*H*,3'*H*,9'*H*-dispiro[indoline-3,2'-xanthene-4',5''-thiazolidine]-1,3'-dicarboxylate**

**e (3p).** From **1a** (47.0 mg, 0.12 mmol) and **2f** (23.1 mg, 0.10 mmol), purified by silica gel (200-300 mesh) column chromatography using dichloromethane/petroleum ether (1/2) as eluent to obtain 58.2 mg (93% yield) compound **3p** as a white solid, m.p. 150–152 °C. HPLC (Daicel Chiralpak IB, *n*-hexane/ethyl acetate = 85:15, flow rate 1.0 mL/min, detection at 254 nm):  $t_R = 10.2$  min (minor),  $t_R = 13.7$  min (major); 95% ee.  $[\alpha]_D^{25} = -27.1^\circ$  ( $c = 2.44$ ,  $\text{CH}_2\text{Cl}_2$ ).  $^1\text{H}$  NMR (400 MHz,  $\text{CDCl}_3$ ):  $\delta$  7.85 (d,  $J = 8.0$  Hz, 1H, ArH), 7.81 (dd,  $J_1 = 7.8$  Hz,  $J_2 = 1.8$  Hz, 1H, ArH), 7.50–7.46 (m, 1H, ArH), 7.36–7.32 (m, 1H, ArH), 7.20–7.15 (m, 2H, ArH), 7.04 (t,  $J = 8.0$  Hz, 1H, ArH), 6.86 (d,  $J = 7.6$  Hz, 1H, ArH), 4.87 (d,  $J = 13.6$  Hz, 1H, CH), 4.09 (s, 1H, CH), 4.04–3.96 (m, 1H,  $\text{CH}_2$ ), 3.86–3.78 (m, 1H,  $\text{CH}_2$ ), 3.71–3.63 (m, 1H, CH), 3.53 (s, 3H,  $\text{CH}_3$ ), 2.62 (dd,  $J_1 = 15.0$  Hz,  $J_2 = 3.4$  Hz, 1H,  $\text{CH}_2$ ), 1.78 (dd,  $J_1 = 15.2$  Hz,  $J_2 = 12.0$  Hz, 1H,  $\text{CH}_2$ ), 1.66 (s, 9H,  $\text{CH}_3$ ), 0.98 (t,  $J = 7.2$  Hz, 3H,  $\text{CH}_3$ ) ppm.  $^{13}\text{C}$  NMR (100 MHz,  $\text{CDCl}_3$ ):  $\delta$  202.1, 190.4, 177.6, 176.1, 166.5, 159.4, 148.8, 139.5, 136.4, 130.7, 129.0, 127.0, 124.7, 122.4, 121.0, 119.9, 117.9, 115.5, 84.8, 82.2, 65.1, 62.4, 53.2, 47.0, 39.6, 33.6, 31.6, 28.1, 13.4 ppm. HRMS (ESI):  $m/z$  calcd. for  $\text{C}_{31}\text{H}_{31}\text{N}_2\text{O}_8\text{S}_2$   $[\text{M} + \text{H}]^+$  623.1516, found 623.1538.

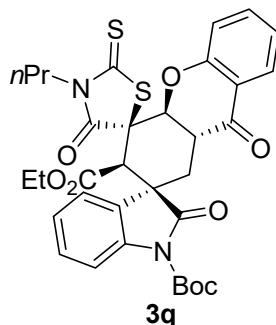

**(3R,3'S,4'R,4a'S,9a'R)-1-(tert-Butyl) 3'-ethyl 2,4'',9'-trioxo-3''-propyl-2''-thioxo-4a',9a'-dihydro-1'H,3'H,9'H-dispiro[indoline-3,2'-xanthene-4',5''-thiazolidine]-1,3'-dicarboxylate (3q).** From **1a** (47.0 mg, 0.12 mmol) and **2g** (25.9 mg, 0.10 mmol), purified by silica gel (200-300 mesh) column chromatography using dichloromethane/petroleum ether (1/2) as eluent to obtain 61.2 mg (94% yield) compound **3q** as a white solid, m.p. 147–149 °C. HPLC (Daicel Chiralpak IB, *n*-hexane/ethyl acetate = 85:15, flow rate 1.0 mL/min, detection at 254 nm):  $t_R = 7.5$  min (minor),  $t_R = 11.2$  min (major); 92% ee.  $[\alpha]_D^{25} = -37.4^\circ$  ( $c = 2.54$ ,  $\text{CH}_2\text{Cl}_2$ ).  $^1\text{H}$  NMR (400 MHz,  $\text{CDCl}_3$ ):  $\delta$  7.85 (d,  $J = 8.4$  Hz, 1H, ArH), 7.82 (dd,  $J_1 = 8.0$  Hz,  $J_2 = 1.6$  Hz, 1H, ArH), 7.50–7.46 (m, 1H, ArH), 7.36–7.31 (m, 1H, ArH), 7.20–7.15 (m, 2H, ArH),

7.05 (t,  $J = 8.0$  Hz, 1H, ArH), 6.82 (d,  $J = 8.4$  Hz, 1H, ArH), 4.87 (d,  $J = 14.0$  Hz, 1H, CH), 4.24–4.17 (m, 1H, CH<sub>2</sub>), 4.08 (s, 1H, CH), 4.02–3.96 (m, 2H, CH<sub>2</sub>), 3.88–3.80 (m, 1H, CH<sub>2</sub>), 3.71–3.63 (m, 1H, CH), 2.62 (dd,  $J_1 = 15.2$  Hz,  $J_2 = 3.6$  Hz, 1H, CH<sub>2</sub>), 1.86–1.74 (m, 3H, CH<sub>2</sub>), 1.66 (s, 9H, CH<sub>3</sub>), 1.06 (t,  $J = 7.4$  Hz, 3H, CH<sub>3</sub>), 0.98 (t,  $J = 7.2$  Hz, 3H, CH<sub>3</sub>) ppm. <sup>13</sup>C NMR (100 MHz, CDCl<sub>3</sub>):  $\delta$  202.2, 190.5, 177.6, 176.1, 166.6, 159.5, 148.8, 139.5, 136.5, 130.7, 129.0, 127.1, 124.6, 122.3, 121.0, 119.9, 117.6, 115.4, 84.8, 82.4, 64.5, 62.5, 53.1, 47.0, 46.4, 39.5, 33.6, 28.1, 20.2, 13.4, 11.3 ppm. HRMS (ESI):  $m/z$  calcd. for C<sub>33</sub>H<sub>35</sub>N<sub>2</sub>O<sub>8</sub>S<sub>2</sub> [M + H]<sup>+</sup> 651.1829, found 651.1814.

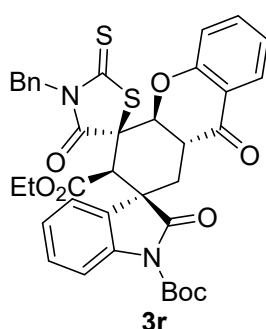

**(3R,3'S,4'R,4a'S,9a'R)-1-(tert-Butyl) 3'-ethyl 3''-benzyl-2,4'',9'-trioxo-2''-thioxo-4a',9a'-dihydro-1'H,3'H,9'H-dispiro[indoline-3,2'-xanthene-4',5''-thiazolidine]-1,3'-dicarboxylate (3r).** From **1a** (47.0 mg, 0.12 mmol) and **2h** (30.7 mg, 0.10 mmol), purified by silica gel (200-300 mesh) column chromatography using dichloromethane/petroleum ether (1/2) as eluent to obtain 61.9 mg (89% yield) compound **3r** as a white solid, m.p. 161–162 °C. HPLC (Daicel Chiralpak IB, *n*-hexane/ethyl acetate = 85:15, flow rate 1.0 mL/min, detection at 254 nm):  $t_R = 9.5$  min (minor),  $t_R = 21.4$  min (major); 93% ee.  $[\alpha]_D^{25} = -39.2^\circ$  ( $c = 2.36$ , CH<sub>2</sub>Cl<sub>2</sub>). <sup>1</sup>H NMR (400 MHz, CDCl<sub>3</sub>):  $\delta$  7.85 (d,  $J = 8.4$  Hz, 1H, ArH), 7.78 (dd,  $J_1 = 7.8$  Hz,  $J_2 = 1.8$  Hz, 1H, ArH), 7.57 (dd,  $J_1 = 7.8$  Hz,  $J_2 = 1.8$  Hz, 2H, ArH), 7.43–7.39 (m, 1H, ArH), 7.38–7.31 (m, 4H, ArH), 7.17 (d,  $J = 4.4$  Hz, 2H, ArH), 7.01 (t,  $J = 8.0$  Hz, 1H, ArH), 6.50 (d,  $J = 8.4$  Hz, 1H, ArH), 5.43 (d,  $J = 14.4$  Hz, 1H, CH<sub>2</sub>), 5.19 (d,  $J = 14.0$  Hz, 1H, CH<sub>2</sub>), 4.85 (d,  $J = 13.6$  Hz, 1H, CH), 4.09 (s, 1H, CH), 3.96–3.88 (m, 1H, CH), 3.72–3.61 (m, 2H, CH<sub>2</sub>), 2.61 (dd,  $J_1 = 15.0$  Hz,  $J_2 = 3.4$  Hz, 1H, CH<sub>2</sub>), 1.75 (dd,  $J_1 = 15.2$  Hz,  $J_2 = 12.0$  Hz, 1H, CH<sub>2</sub>), 1.65 (s, 9H, CH<sub>3</sub>), 0.92 (t,  $J = 7.2$  Hz, 3H, CH<sub>3</sub>) ppm. <sup>13</sup>C NMR (100 MHz, CDCl<sub>3</sub>):  $\delta$  201.7, 190.4, 177.7, 176.2, 166.5, 159.4, 148.8, 139.5, 136.3, 134.8, 130.8, 129.1, 129.0, 128.4, 128.1, 127.0, 124.7, 122.3, 121.0, 119.9, 117.7, 115.5, 84.8, 82.4, 64.7, 62.5, 53.0, 47.9, 47.0,

39.5, 33.6, 28.1, 13.5 ppm. HRMS (ESI):  $m/z$  calcd. for  $C_{37}H_{35}N_2O_8S_2$   $[M + H]^+$  699.1829, found 699.1809.

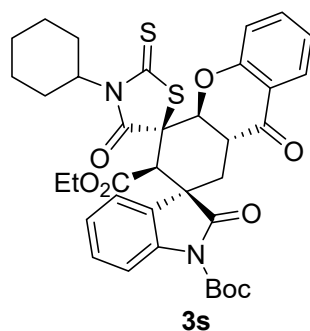

**(3*R*,3'*S*,4'*R*,4*a*'*S*,9*a*'*R*)-1-(*tert*-Butyl) 3'-ethyl 3''-cyclohexyl-2,4'',9'-trioxo-2''-thioxo-4*a*',9*a*'-dihydro-1'*H*,3'*H*,9'*H*-dispiro[indoline-3,2'-xanthene-4',5''-thiazolidine]-1,3'-dicarboxylate (3s).** From **1a** (47.0 mg, 0.12 mmol) and **2i** (29.9 mg, 0.10 mmol), purified by silica gel (200-300 mesh) column chromatography using dichloromethane/petroleum ether (1/2) as eluent to obtain 62.9 mg (91% yield) compound **3s** as a light yellow solid, m.p. 181–183 °C. HPLC (Daicel Chiralpak IB, *n*-hexane/ethyl acetate = 90:10, flow rate 1.0 mL/min, detection at 254 nm):  $t_R$  = 10.0 min (minor),  $t_R$  = 16.9 min (major); 94% ee.  $[\alpha]_D^{25} = -6.7^\circ$  ( $c = 1.70$ ,  $CH_2Cl_2$ ).  $^1H$  NMR (400 MHz,  $CDCl_3$ ):  $\delta$  7.85 (d,  $J = 8.0$  Hz, 1H, ArH), 7.81 (dd,  $J_1 = 8.0$  Hz,  $J_2 = 1.6$  Hz, 1H, ArH), 7.50–7.46 (m, 1H, ArH), 7.35–7.31 (m, 1H, ArH), 7.17 (d,  $J = 4.4$  Hz, 2H, ArH), 7.04 (t,  $J = 7.6$  Hz, 1H, ArH), 6.83 (d,  $J = 8.0$  Hz, 1H, ArH), 5.06 (t,  $J = 12.2$  Hz, 1H, CH), 4.79 (d,  $J = 13.6$  Hz, 1H, CH), 4.05–3.97 (m, 2H, CH +  $CH_2$ ), 3.93–3.85 (m, 1H,  $CH_2$ ), 3.68–3.61 (m, 1H, CH), 2.60 (dd,  $J_1 = 15.0$  Hz,  $J_2 = 3.4$  Hz, 1H,  $CH_2$ ), 2.44–2.35 (m, 2H,  $CH_2$ ), 1.91 (t,  $J = 10.8$  Hz, 2H,  $CH_2$ ), 1.80–1.71 (m, 3H,  $CH_2$ ), 1.66 (s, 9H,  $CH_3$ ), 1.50–1.22 (m, 4H,  $CH_2$ ), 1.00 (t,  $J = 7.2$  Hz, 3H,  $CH_3$ ) ppm.  $^{13}C$  NMR (100 MHz,  $CDCl_3$ ):  $\delta$  203.2, 190.6, 177.6, 176.1, 166.7, 159.6, 148.9, 139.5, 136.5, 130.9, 129.0, 127.1, 124.6, 122.3, 120.9, 119.9, 117.7, 115.4, 84.8, 82.8, 62.5, 62.3, 58.3, 52.8, 47.0, 39.5, 33.7, 28.1, 27.6, 27.4, 26.0, 25.9, 25.1, 13.6 ppm. HRMS (ESI):  $m/z$  calcd. for  $C_{36}H_{39}N_2O_8S_2$   $[M + H]^+$  691.2142, found 691.2117.

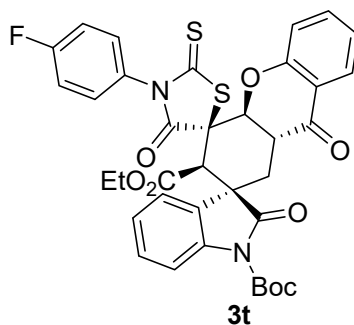

**(3*R*,3'*S*,4'*R*,4*a*'*S*,9*a*'*R*)-1-(*tert*-Butyl) 3'-ethyl 3''-(4-fluorophenyl)-2,4'',9'-trioxo-2''-thioxo-4*a*',9*a*'-dihydro-1'*H*,3'*H*,9'*H*-dispiro[indoline-3,2'-xanthene-4',5''-thiazolidine]-1, 3'-dicarboxylate (3t).** From **1a** (47.0 mg, 0.12 mmol) and **2j** (31.1 mg, 0.10 mmol), purified by silica gel (200-300 mesh) column chromatography using dichloromethane/petroleum ether (1/2) as eluent to obtain 68.9 mg (98% yield) compound **3t** as a light yellow solid, m.p. 179–181 °C. HPLC (Daicel Chiralpak IC, *n*-hexane/ethyl acetate = 90:10, flow rate 1.0 mL/min, detection at 254 nm):  $t_R$  = 14.9 min (minor),  $t_R$  = 12.7 min (major); 92% ee.  $[\alpha]_D^{25} = +17.3^\circ$  ( $c = 2.88$ ,  $\text{CH}_2\text{Cl}_2$ ).  $^1\text{H NMR}$  (400 MHz,  $\text{CDCl}_3$ ):  $\delta$  7.86 (d,  $J = 8.0$  Hz, 1H, ArH), 7.84 (dd,  $J_1 = 8.0$  Hz,  $J_2 = 1.6$  Hz, 1H, ArH), 7.55–7.50 (m, 1H, ArH), 7.37–7.30 (m, 3H, ArH), 7.27–7.23 (m, 2H, ArH), 7.20–7.16 (m, 2H, ArH), 7.07 (t,  $J = 8.0$  Hz, 1H, ArH), 6.94 (d,  $J = 8.0$  Hz, 1H, ArH), 4.94 (d,  $J = 13.6$  Hz, 1H, CH), 4.15 (s, 1H, CH), 4.06–3.97 (m, 2H,  $\text{CH}_2$ ), 3.76–3.69 (m, 1H, CH), 2.64 (dd,  $J_1 = 15.0$  Hz,  $J_2 = 3.4$  Hz, 1H,  $\text{CH}_2$ ), 1.80 (dd,  $J_1 = 15.2$  Hz,  $J_2 = 11.6$  Hz, 1H,  $\text{CH}_2$ ), 1.67 (s, 9H,  $\text{CH}_3$ ), 1.03 (t,  $J = 7.2$  Hz, 3H,  $\text{CH}_3$ ) ppm.  $^{13}\text{C NMR}$  (100 MHz,  $\text{CDCl}_3$ ):  $\delta$  201.9, 190.3, 177.3, 176.1, 166.8, 162.9 (d,  $^1J_{\text{C-F}} = -248.5$  Hz), 159.4, 148.8, 139.4, 136.6, 131.1 (d,  $^4J_{\text{C-F}} = 3.2$  Hz), 130.7, 130.0 (d,  $^3J_{\text{C-F}} = 9.0$  Hz), 129.1, 127.2, 124.8, 122.5, 121.0, 120.0, 117.7, 116.7 (d,  $^2J_{\text{C-F}} = 23.0$  Hz), 115.4, 84.9, 82.6, 65.6, 62.8, 53.2, 47.0, 39.6, 33.7, 28.1, 13.5 ppm.  $^{19}\text{F NMR}$  (376 MHz,  $\text{CDCl}_3$ ):  $\delta$  -110.5 ppm. HRMS (ESI):  $m/z$  calcd. for  $\text{C}_{36}\text{H}_{32}\text{FN}_2\text{O}_8\text{S}_2$   $[\text{M} + \text{H}]^+$  703.1579, found 703.1587.



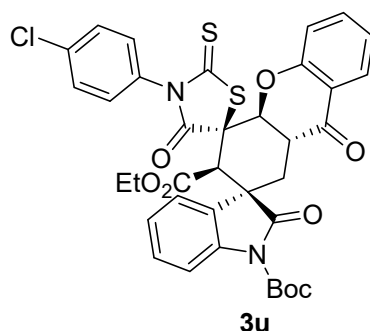

**(3*R*,3'*S*,4'*R*,4*a*'*S*,9*a*'*R*)-1-(*tert*-Butyl) 3'-ethyl 3''-(4-chlorophenyl)-2,4'',9'-trioxo-2''-thioxo-4*a*',9*a*'-dihydro-1'*H*,3'*H*,9'*H*-dispiro[indoline-3,2'-xanthene-4',5''-thiazolidine]-1,3'-dicarboxylate (3u).** From **1a** (47.0 mg, 0.12 mmol) and **2k** (32.8 mg, 0.10 mmol), purified by silica gel (200-300 mesh) column chromatography using dichloromethane/petroleum ether (1/2) as eluent to obtain 60.9 mg (85% yield) compound **3u** as a light yellow solid, m.p. 177–179 °C. HPLC (Daicel Chiralpak IB, *n*-hexane/ethyl acetate = 85:15, flow rate 1.0 mL/min, detection at 254 nm):  $t_R$  = 9.6 min (minor),  $t_R$  = 18.0 min (major); 94% ee.  $[\alpha]_D^{25}$  = +8.6° ( $c$  = 2.59, CH<sub>2</sub>Cl<sub>2</sub>). <sup>1</sup>H NMR (400 MHz, CDCl<sub>3</sub>):  $\delta$  7.87–7.82 (m, 2H, ArH), 7.55–7.50 (m, 3H, ArH), 7.37–7.33 (m, 1H, ArH), 7.30–7.26 (m, 2H, ArH), 7.20–7.16 (m, 2H, ArH), 7.07 (t,  $J$  = 8.0 Hz, 1H, ArH), 6.94 (d,  $J$  = 8.0 Hz, 1H, ArH), 4.93 (d,  $J$  = 13.6 Hz, 1H, CH), 4.15 (s, 1H, CH), 4.06–3.97 (m, 2H, CH<sub>2</sub>), 3.76–3.69 (m, 1H, CH), 2.64 (dd,  $J_1$  = 15.0 Hz,  $J_2$  = 3.4 Hz, 1H, CH<sub>2</sub>), 1.80 (dd,  $J_1$  = 15.2 Hz,  $J_2$  = 12.0 Hz, 1H, CH<sub>2</sub>), 1.67 (s, 9H, CH<sub>3</sub>), 1.02 (t,  $J$  = 7.2 Hz, 3H, CH<sub>3</sub>) ppm. <sup>13</sup>C NMR (100 MHz, CDCl<sub>3</sub>):  $\delta$  201.7, 190.2, 177.1, 176.1, 166.8, 159.4, 148.8, 139.4, 136.6, 135.7, 133.7, 130.7, 129.9, 129.5, 129.1, 127.2, 124.8, 122.6, 121.0, 120.0, 117.7, 115.4, 84.9, 82.6, 65.7, 62.8, 53.2, 47.0, 39.6, 33.7, 28.1, 13.5 ppm. HRMS (ESI):  $m/z$  calcd. for C<sub>36</sub>H<sub>32</sub>ClN<sub>2</sub>O<sub>8</sub>S<sub>2</sub> [M + H]<sup>+</sup> 719.1283, found 719.1291.

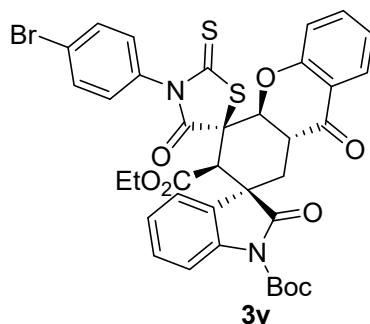

**(3R,3'S,4'R,4a'S,9a'R)-1-(tert-Butyl) 3'-ethyl 3''-(4-bromophenyl)-2,4'',9'-trioxo-2''-thioxo-4a',9a'-dihydro-1'H,3'H,9'H-dispiro[indoline-3,2'-xanthene-4',5''-thiazolidine]-1,3'-dicarboxylate (3v).** From **1a** (47.0 mg, 0.12 mmol) and **2k** (37.2 mg, 0.10 mmol), purified by silica gel (200-300 mesh) column chromatography using dichloromethane/petroleum ether (1/2) as eluent to obtain 68.0 mg (89% yield) compound **3v** as a light yellow solid, m.p. 201–203 °C. HPLC (Daicel Chiralpak IB, *n*-hexane/ethyl acetate = 85:15, flow rate 1.0 mL/min, detection at 254 nm):  $t_R = 10.0$  min (minor),  $t_R = 18.1$  min (major); 94% ee.  $[\alpha]_D^{25} = +4.9^\circ$  ( $c = 1.90$ , CH<sub>2</sub>Cl<sub>2</sub>). <sup>1</sup>H NMR (400 MHz, CDCl<sub>3</sub>):  $\delta$  7.87–7.83 (m, 2H, ArH), 7.72–7.68 (m, 2H, ArH), 7.55–7.51 (m, 1H, ArH), 7.37–7.33 (m, 1H, ArH), 7.24–7.18 (m, 4H, ArH), 7.08 (t,  $J = 8.0$  Hz, 1H, ArH), 6.94 (d,  $J = 8.0$  Hz, 1H, ArH), 4.93 (d,  $J = 14.0$  Hz, 1H, CH), 4.14 (s, 1H, CH), 4.06–3.97 (m, 2H, CH<sub>2</sub>), 3.76–3.69 (m, 1H, CH), 2.65 (dd,  $J_1 = 15.2$  Hz,  $J_2 = 3.2$  Hz, 1H, CH<sub>2</sub>), 1.80 (dd,  $J_1 = 15.2$  Hz,  $J_2 = 12.0$  Hz, 1H, CH<sub>2</sub>), 1.67 (s, 9H, CH<sub>3</sub>), 1.02 (t,  $J = 7.2$  Hz, 3H, CH<sub>3</sub>) ppm. <sup>13</sup>C NMR (100 MHz, CDCl<sub>3</sub>):  $\delta$  201.6, 190.2, 177.1, 176.1, 166.8, 159.4, 148.8, 139.4, 136.6, 134.3, 132.9, 130.7, 129.8, 129.1, 127.2, 124.8, 123.9, 122.6, 121.0, 120.0, 117.7, 115.4, 85.0, 82.6, 65.8, 62.8, 53.2, 47.0, 39.6, 33.8, 28.1, 13.5 ppm. HRMS (ESI):  $m/z$  calcd. for C<sub>36</sub>H<sub>32</sub><sup>79</sup>BrN<sub>2</sub>O<sub>8</sub>S<sub>2</sub> [M + H]<sup>+</sup> 763.0778, found 763.0790; calcd. for C<sub>36</sub>H<sub>32</sub><sup>81</sup>BrN<sub>2</sub>O<sub>8</sub>S<sub>2</sub> [M + H]<sup>+</sup> 765.0758, found 765.0733.

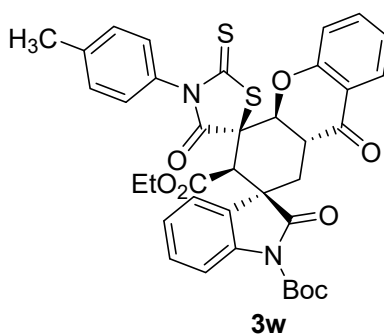

**(3R,3'S,4'R,4a'S,9a'R)-1-(tert-Butyl) 3'-ethyl 2,4'',9'-trioxo-2''-thioxo-3''-(p-tolyl)-4a',9a'-dihydro-1'H,3'H,9'H-dispiro[indoline-3,2'-xanthene-4',5''-thiazolidine]-1,3'-dicarboxylate (3w).** From **1a** (47.0 mg, 0.12 mmol) and **2l** (30.7 mg, 0.10 mmol), purified by silica gel (200-300 mesh) column chromatography using dichloromethane/petroleum ether (1/2) as eluent to obtain 65.0 mg (93% yield) compound **3w** as a light yellow solid, m.p. 192–194 °C. HPLC (Daicel Chiralpak IC, *n*-hexane/ethyl acetate = 90:10, flow rate 1.0 mL/min, detection at 254 nm):  $t_R = 14.4$  min (minor),  $t_R = 17.8$  min (major); 95% ee.  $[\alpha]_D^{25} = +8.0^\circ$  ( $c = 2.54$ ,

CH<sub>2</sub>Cl<sub>2</sub>). <sup>1</sup>H NMR (400 MHz, CDCl<sub>3</sub>): δ 7.86 (d, *J* = 8.4 Hz, 1H, ArH), 7.83 (dd, *J*<sub>1</sub> = 8.0 Hz, *J*<sub>2</sub> = 1.6 Hz, 1H, ArH), 7.54–7.50 (m, 1H, ArH), 7.39–7.32 (m, 3H, ArH), 7.22–7.17 (m, 4H, ArH), 7.06 (t, *J* = 8.0 Hz, 1H, ArH), 6.95 (d, *J* = 8.0 Hz, 1H, ArH), 4.93 (d, *J* = 14.0 Hz, 1H, CH), 4.16 (s, 1H, CH), 4.09–3.98 (m, 2H, CH<sub>2</sub>), 3.77–3.70 (m, 1H, CH), 2.64 (dd, *J*<sub>1</sub> = 15.2 Hz, *J*<sub>2</sub> = 3.6 Hz, 1H, CH<sub>2</sub>), 2.43 (s, 3H, CH<sub>3</sub>), 1.79 (dd, *J*<sub>1</sub> = 15.2 Hz, *J*<sub>2</sub> = 12.0 Hz, 1H, CH<sub>2</sub>), 1.67 (s, 9H, CH<sub>3</sub>), 1.05 (t, *J* = 7.2 Hz, 3H, CH<sub>3</sub>) ppm. <sup>13</sup>C NMR (100 MHz, CDCl<sub>3</sub>): δ 202.2, 190.4, 177.3, 176.1, 166.8, 159.5, 148.9, 139.8, 139.4, 136.5, 132.7, 130.8, 130.3, 129.0, 127.7, 127.1, 124.7, 122.5, 121.0, 120.0, 117.7, 115.4, 84.9, 82.7, 65.5, 62.7, 53.1, 47.0, 39.6, 33.7, 28.1, 21.4, 13.6 ppm. HRMS (ESI): *m/z* calcd. for C<sub>37</sub>H<sub>35</sub>N<sub>2</sub>O<sub>8</sub>S<sub>2</sub> [M + H]<sup>+</sup> 699.1829, found 699.1830.

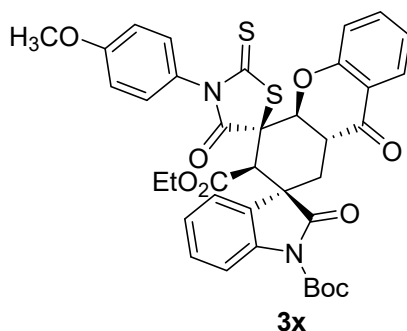

**(3*R*,3'*S*,4'*R*,4*a*'*S*,9*a*'*R*)-1-(*tert*-Butyl) 3'-ethyl 3''-(4-methoxyphenyl)-2,4'',9'-trioxo-2''-thioxo-4*a*',9*a*'-dihydro-1'*H*,3'*H*,9'*H*-dispiro[indoline-3,2'-xanthene-4',5''-thiazolidine]-1, 3'-dicarboxylate (3x).** From **1a** (47.0 mg, 0.12 mmol) and **2m** (32.3 mg, 0.10 mmol), purified by silica gel (200-300 mesh) column chromatography using dichloromethane/petroleum ether (1/2) as eluent to obtain 66.1 mg (92% yield) compound **3x** as a light yellow solid, m.p. 196–198 °C. HPLC (Daicel Chiralpak IC, *n*-hexane/ethyl acetate = 90:10, flow rate 1.0 mL/min, detection at 254 nm): *t*<sub>R</sub> = 41.0 min (minor), *t*<sub>R</sub> = 29.2 min (major); 94% ee. [ $\alpha$ ]<sub>D</sub><sup>25</sup> = +4.5° (*c* = 2.33, CH<sub>2</sub>Cl<sub>2</sub>). <sup>1</sup>H NMR (400 MHz, CDCl<sub>3</sub>): δ 7.86 (d, *J* = 8.0 Hz, 1H, ArH), 7.83 (dd, *J*<sub>1</sub> = 8.0 Hz, *J*<sub>2</sub> = 1.6 Hz, 1H, ArH), 7.54–7.50 (m, 1H, ArH), 7.37–7.33 (m, 1H, ArH), 7.26–7.23 (m, 2H, ArH), 7.20–7.18 (m, 2H, ArH), 7.08–7.05 (m, 3H, ArH), 6.94 (d, *J* = 8.4 Hz, 1H, ArH), 4.93 (d, *J* = 13.6 Hz, 1H, CH), 4.16 (s, 1H, CH), 4.08–3.97 (m, 2H, CH<sub>2</sub>), 3.86 (s, 3H, OCH<sub>3</sub>), 3.77–3.70 (m, 1H, CH), 2.64 (dd, *J*<sub>1</sub> = 15.0 Hz, *J*<sub>2</sub> = 3.4 Hz, 1H, CH<sub>2</sub>), 1.79 (dd, *J*<sub>1</sub> = 15.2 Hz, *J*<sub>2</sub> = 12.0 Hz, 1H, CH<sub>2</sub>), 1.67 (s, 9H, CH<sub>3</sub>), 1.05 (t, *J* = 7.0 Hz, 3H, CH<sub>3</sub>) ppm. <sup>13</sup>C NMR (100 MHz, CDCl<sub>3</sub>): δ 202.4, 190.4, 177.4, 176.1,

166.8, 160.2, 159.5, 148.9, 139.4, 136.5, 130.8, 129.1, 129.0, 127.8, 127.1, 124.7, 122.5, 121.0, 120.0, 117.7, 115.4, 114.8, 84.9, 82.7, 65.4, 62.7, 55.5, 53.1, 47.0, 39.6, 33.7, 28.1, 13.6 ppm. HRMS (ESI):  $m/z$  calcd. for  $C_{37}H_{35}N_2O_9S_2$   $[M + H]^+$  715.1778, found 715.1779.

## 5. Gram-scale synthesis of **3a**

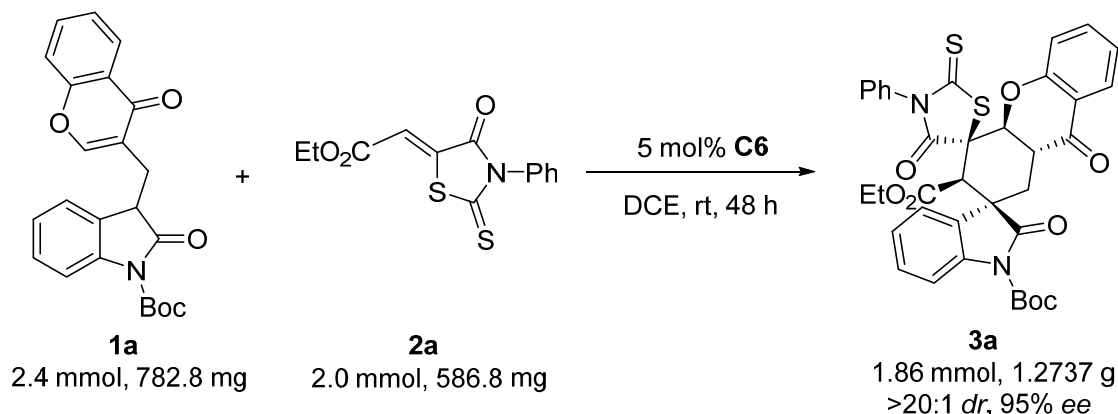

Rhodamine derivative **2a** (586.8 mg, 2.0 mmol) and catalyst **C6** (64.0 mg, 5 mol %) were dissolved in dry DCE (20 mL) at room temperature for 15 min. Then, oxindole-chromone **1a** (782.8 mg, 2.4 mmol) was added. After stirring at room temperature for 48 h, the reaction mixture was concentrated and directly purified by silica gel column chromatography (petroleum ether/ $CH_2Cl_2$ , 2:1) to afford the desired product **3a** as a white solid (1.2737 g, 93% yield) with >20:1 *dr* and 95% *ee*.

## 6. Procedure and the characterization data of compounds **3b** and **3c**

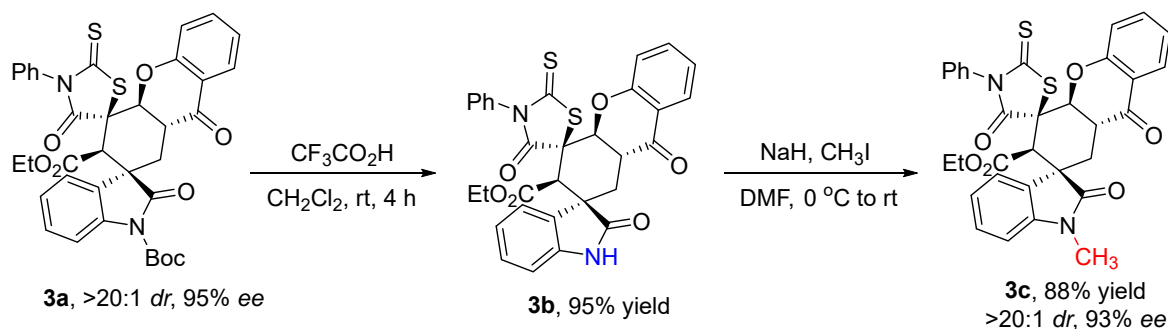

Compound **3a** (165.5 mg, 0.24 mmol) was dissolved in dry  $CH_2Cl_2$  (5 mL) at room temperature. Trifluoroacetic acid (0.3 mL) was added dropwise and the reaction mixture was stirred at room temperature for 4 h. After that, the reaction mixture was concentrated and directly purified by silica gel column chromatography ( $CH_2Cl_2$  to  $CH_2Cl_2/CH_3OH$ , 30:1) to afford the desired product **3b** as a light yellow solid (133.3 mg, 95% yield), but cannot be separated by HPLC. m.p. 194–196 °C.  $[\alpha]_D^{25} = +54.9^\circ$  ( $c = 2.64$ , DMSO).  $^1H$  NMR (400

MHz, DMSO-*d*<sub>6</sub>):  $\delta$  10.71 (s, 1H, NH), 7.78–7.76 (m, 1H, ArH), 7.67–7.62 (m, 3H, ArH), 7.59–7.56 (m, 1H, ArH), 7.41 (d,  $J = 7.6$  Hz, 1H, ArH), 7.34 (d,  $J = 7.6$  Hz, 2H, ArH), 7.23 (td,  $J_1 = 7.6$  Hz,  $J_2 = 0.9$  Hz, 1H, ArH), 7.18–7.14 (m, 2H, ArH), 7.00 (t,  $J = 7.6$  Hz, 1H, ArH), 6.90 (d,  $J = 7.6$  Hz, 1H, ArH), 5.34 (d,  $J = 13.6$  Hz, 1H, CH), 4.31 (s, 1H, CH), 4.09–4.02 (m, 1H, CH<sub>2</sub>), 4.00–3.92 (m, 1H, CH<sub>2</sub>), 3.69–3.62 (m, 1H, CH), 2.25 (dd,  $J_1 = 14.4$  Hz,  $J_2 = 11.6$  Hz, 1H, CH<sub>2</sub>), 2.14 (dd,  $J_1 = 14.4$  Hz,  $J_2 = 3.6$  Hz, 1H, CH<sub>2</sub>), 0.96 (t,  $J = 7.2$  Hz, 3H, CH<sub>3</sub>) ppm. <sup>13</sup>C NMR (100 MHz, DMSO-*d*<sub>6</sub>):  $\delta$  202.9, 190.3, 179.4, 176.4, 167.0, 158.9, 141.7, 136.6, 135.1, 133.1, 129.7, 129.6, 128.2, 128.0, 126.6, 122.5, 121.8, 121.7, 119.9, 117.7, 109.6, 81.8, 79.1, 65.8, 61.8, 51.3, 46.6, 32.0, 13.4 ppm. HRMS (ESI):  $m/z$  calcd. for C<sub>31</sub>H<sub>25</sub>N<sub>2</sub>O<sub>6</sub>S<sub>2</sub> [M + H]<sup>+</sup> 585.1149, found 585.1163.

To a stirred solution of **3b** (116.9 mg, 0.2 mmol) in DMF (5 mL) was added NaH (12.0 mg, 0.3 mmol) at 0 °C. Then methyl iodide (42.6 mg, 0.3 mmol) in 2 mL DMF was added dropwise into the stirred reaction mixture. The reaction mixture was allowed to stir at room temperature for another 12 h, the product **3b** was completely consumed as detected by TLC analysis. After that, the mixture was treated with water (20 mL) and extracted with CH<sub>2</sub>Cl<sub>2</sub> (3 × 10 mL). The combined organic extracts was washed by brine, dried over Na<sub>2</sub>SO<sub>4</sub>, and the solvent was removed under vacuum. The crude product was purified by flash column chromatography on silica gel (petroleum ether/CH<sub>2</sub>Cl<sub>2</sub>, 1:2 to CH<sub>2</sub>Cl<sub>2</sub>) to afford the pure product **3c** as a white solid (111.4 mg, 93% yield), m.p. 191–193 °C. HPLC (Daicel Chiralpak IC, *n*-hexane/ethyl acetate = 90:10, flow rate 1.0 mL/min, detection at 254 nm):  $t_R = 30.7$  min (minor),  $t_R = 40.4$  min (major); 93% ee.  $[\alpha]_D^{25} = +42.5^\circ$  ( $c = 2.87$ , CHCl<sub>3</sub>). <sup>1</sup>H NMR (400 MHz, CDCl<sub>3</sub>):  $\delta$  7.84 (dd,  $J_1 = 7.6$  Hz,  $J_2 = 1.6$  Hz, 1H, ArH), 7.60–7.56 (m, 2H, ArH), 7.55–7.51 (m, 2H, ArH), 7.35–7.31 (m, 3H, ArH), 7.17 (d,  $J = 6.8$  Hz, 1H, ArH), 7.09–7.05 (m, 2H, ArH), 6.97 (d,  $J = 8.0$  Hz, 1H, ArH), 6.90 (d,  $J = 7.6$  Hz, 1H, ArH), 4.95 (d,  $J = 13.6$  Hz, 1H, CH), 4.17 (s, 1H, CH), 4.13–4.05 (m, 1H, CH<sub>2</sub>), 4.00–3.92 (m, 1H, CH<sub>2</sub>), 3.90–3.83 (m, 1H, CH), 3.27 (s, 3H, CH<sub>3</sub>), 2.51 (dd,  $J_1 = 14.8$  Hz,  $J_2 = 3.2$  Hz, 1H, CH<sub>2</sub>), 1.84 (dd,  $J_1 = 15.0$  Hz,  $J_2 = 11.8$  Hz, 1H, CH<sub>2</sub>), 1.03 (t,  $J = 7.2$  Hz, 3H, CH<sub>3</sub>) ppm. <sup>13</sup>C NMR (100 MHz, CDCl<sub>3</sub>):  $\delta$  202.2, 190.7, 177.6, 177.4, 166.9, 159.6, 143.4, 136.5, 135.5, 132.0, 129.7, 129.6, 128.8, 128.1, 127.1, 122.8, 122.4, 121.1, 120.1, 117.8, 108.6, 83.0, 65.7, 62.4, 52.5, 46.7, 39.5,

33.3, 26.3, 13.8 ppm. HRMS (ESI):  $m/z$  calcd. for  $C_{32}H_{27}N_2O_6S_2$   $[M + H]^+$  599.1305, found 599.1325.

## 7. Procedure and the characterization data of compound 4

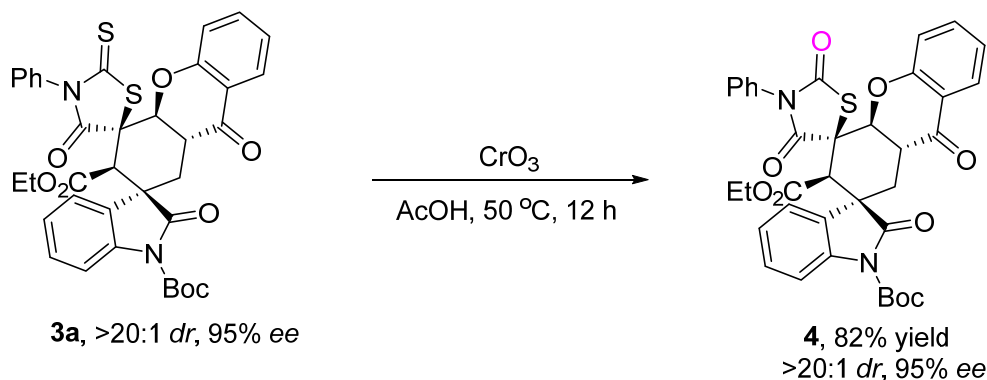

To a solution of compound **3a** (124.5 mg, 0.18 mmol) in acetic acid (3.0 mL) was added chromium trioxide (54.0 mg, 0.54 mmol) in three portions over 30 min at room temperature. The solution was stirred at 50 °C for 12 h. The mixture was treated with water (20 mL) and extracted with EtOAc (3 × 10 mL). The combined organic extracts was washed by brine, dried over  $Na_2SO_4$ , and the solvent was removed under vacuum. The crude product was purified by flash column chromatography on silica gel (petroleum ether/ $CH_2Cl_2$ , 1:2) to afford the pure product **4** as a white solid (98.7 mg, 82% yield), m.p. 196–197 °C. HPLC (Daicel Chiralpak IC, *n*-hexane/ethyl acetate = 85:15, flow rate 1.0 mL/min, detection at 254 nm):  $t_R$  = 9.1 min (minor),  $t_R$  = 17.2 min (major); 95% *ee*.  $[\alpha]_D^{25}$  = +15.3° ( $c$  = 1.37,  $CH_2Cl_2$ ).  $^1H$  NMR (400 MHz,  $CDCl_3$ ):  $\delta$  7.87–7.84 (m, 2H, ArH), 7.57–7.50 (m, 3H, ArH), 7.49–7.46 (m, 1H, ArH), 7.40–7.33 (m, 3H, ArH), 7.21–7.15 (m, 2H, ArH), 7.07 (t,  $J$  = 8.0 Hz, 1H, ArH), 6.96 (d,  $J$  = 8.4 Hz, 1H, ArH), 4.94 (d,  $J$  = 13.6 Hz, 1H, CH), 4.21 (s, 1H, CH), 4.12–3.99 (m, 2H,  $CH_2$ ), 3.78–3.71 (m, 1H, CH), 2.66 (dd,  $J_1$  = 15.0 Hz,  $J_2$  = 3.4 Hz, 1H,  $CH_2$ ), 1.81 (dd,  $J_1$  = 15.2 Hz,  $J_2$  = 12.0 Hz, 1H,  $CH_2$ ), 1.67 (s, 9H,  $CH_3$ ), 1.05 (t,  $J$  = 7.2 Hz, 3H,  $CH_3$ ) ppm.  $^{13}C$  NMR (100 MHz,  $CDCl_3$ ):  $\delta$  190.5, 176.1, 175.3, 171.5, 166.9, 159.5, 148.9, 139.5, 136.6, 133.1, 130.8, 129.4, 129.3, 129.1, 127.2, 127.0, 124.7, 122.5, 121.1, 120.0, 117.7, 115.4, 84.9, 82.4, 64.1, 62.6, 53.3, 47.1, 39.7, 33.9, 28.1, 13.6 ppm. HRMS (ESI):  $m/z$  calcd. for  $C_{36}H_{32}N_2O_9SNa$   $[M + Na]^+$  691.1721, found 691.1741.

## 8. Procedure and the characterization data of compound 5

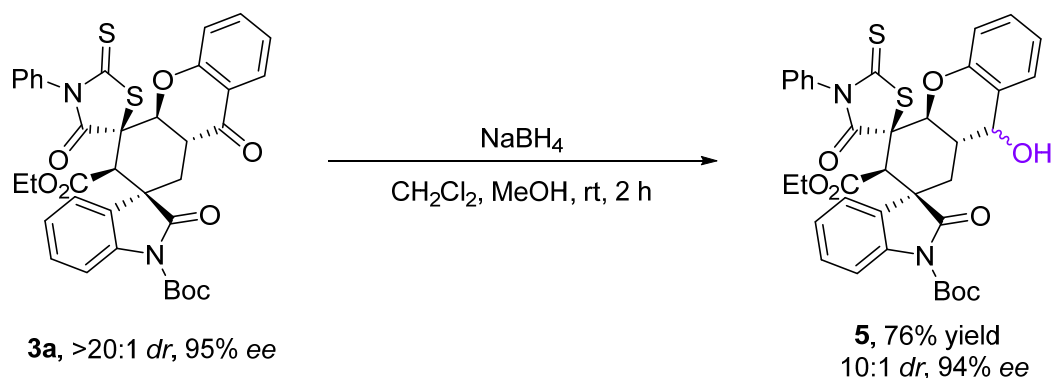

To a solution of compound **3a** (161.8 mg, 0.236 mmol) in CH<sub>2</sub>Cl<sub>2</sub> (5.0 mL) was added NaBH<sub>4</sub> (53.9 mg, 1.42 mmol) at 0 °C. Methanol (3.0 mL) was then added dropwise to the reaction solution. The solution was stirred at room temperature for 2 h. The mixture was treated with water (20 mL) and extracted with CH<sub>2</sub>Cl<sub>2</sub> (3 × 10 mL). The combined organic extracts was washed by brine, dried over Na<sub>2</sub>SO<sub>4</sub>, and the solvent was removed under vacuum. The crude product was purified by flash column chromatography on silica gel (petroleum ether/CH<sub>2</sub>Cl<sub>2</sub>, 1:2 to CH<sub>2</sub>Cl<sub>2</sub>) to afford the pure product **5** as a white solid (123.2 mg, 76% yield), m.p. 182–184 °C. HPLC (Daicel Chiralpak IB, *n*-hexane/ethyl acetate = 75:25, flow rate 1.0 mL/min, detection at 254 nm): *t*<sub>R</sub> = 11.2 min (minor), *t*<sub>R</sub> = 11.9 min (major); 94% *ee*. [ $\alpha$ ]<sub>D</sub><sup>25</sup> = +91.5° (*c* = 1.46, CH<sub>2</sub>Cl<sub>2</sub>). <sup>1</sup>H NMR (400 MHz, CDCl<sub>3</sub>):  $\delta$  7.91 (d, *J* = 8.0 Hz, 1H, ArH), 7.84 (dd, *J*<sub>1</sub> = 7.6 Hz, *J*<sub>2</sub> = 1.6 Hz, 1H, ArH), 7.62–7.52 (m, 4H, ArH), 7.44–7.41 (m, 2H, ArH), 7.37–7.33 (m, 1H, ArH), 7.20–7.16 (m, 2H, ArH), 7.08 (t, *J* = 8.0 Hz, 1H, ArH), 6.97 (d, *J* = 8.0 Hz, 1H, ArH), 4.89 (d, *J* = 13.6 Hz, 1H, CH), 4.10 (s, 1H, CH), 4.07–3.99 (m, 2H, CH<sub>2</sub>), 3.82–3.75 (m, 1H, CH), 3.67–3.52 (m, 1H, CH), 2.67 (dd, *J*<sub>1</sub> = 15.0 Hz, *J*<sub>2</sub> = 3.4 Hz, 1H, CH<sub>2</sub>), 1.81 (dd, *J*<sub>1</sub> = 15.2 Hz, *J*<sub>2</sub> = 12.0 Hz, 1H, CH<sub>2</sub>), 1.66 (s, 9H, CH<sub>3</sub>), 1.02 (t, *J* = 7.2 Hz, 3H, CH<sub>3</sub>) ppm. <sup>13</sup>C NMR (100 MHz, CDCl<sub>3</sub>):  $\delta$  199.8, 190.2, 175.6, 173.2, 166.7, 159.3, 149.0, 139.5, 136.6, 133.7, 130.8, 130.7, 130.3, 129.0, 127.2, 126.3, 124.7, 122.5, 120.9, 119.9, 117.7, 115.4, 84.9, 82.8, 64.5, 62.8, 53.3, 47.0, 39.4, 33.8, 28.0, 13.3 ppm. HRMS (ESI): *m/z* calcd. for C<sub>36</sub>H<sub>35</sub>N<sub>2</sub>O<sub>8</sub>S<sub>2</sub> [M + H]<sup>+</sup> 687.1829, found 687.1823.

## 9. Reference

- [1] X. Li, Liu, G. Zhou, Y. Gong, Z. Yao, X. Zuo, W. H. Zhang and Y. Zhou, *Org. Lett.*, 2019, **21**, 2528–2531.
- [2] (a) T. Shailendra, K. P. Singh, K. Akhilesh, P. Poonam and N. F. Ansari, *J. Applicable Chem.*, 2014, **3**, 2372–2377. (b) S. Jin, M. Tagliazucchi, H. J. Son, R. D. Harris, K. O. Aruda, D. J. Weinberg, A. B. Nepomnyashchii, O. K. Farha, J. T. Hupp and E. A. Weiss, *J. Phys. Chem. C*, 2015, **119**, 5195–5202. (c) Ş. H. Üngören, S. Albayrak, A. Günay, L. Yurtseven and N. Yurttas, *Tetrahedron*, 2015, **71**, 4312–4323.
- [3] (a) Y. Zhu, J. P. Malerich and V. H. Rawal, *Angew. Chem. Int. Ed.*, 2010, **49**, 153–156; *Angew. Chem.* **2010**, 122, 157–160. (b) W. Yang and D. M. Du, *Org. Lett.*, 2010, **12**, 5450–5453. (c) W. Yang and D. M. Du, *Adv. Synth. Catal.*, 2011, **353**, 1241–1246. (d) B. Vakulya, S. Varga, A. Csampai and T. Soós, *Org. Lett.*, 2005, **7**, 1967–1969.



### 10. Copies of <sup>1</sup>H and <sup>13</sup>C NMR spectra of new compounds

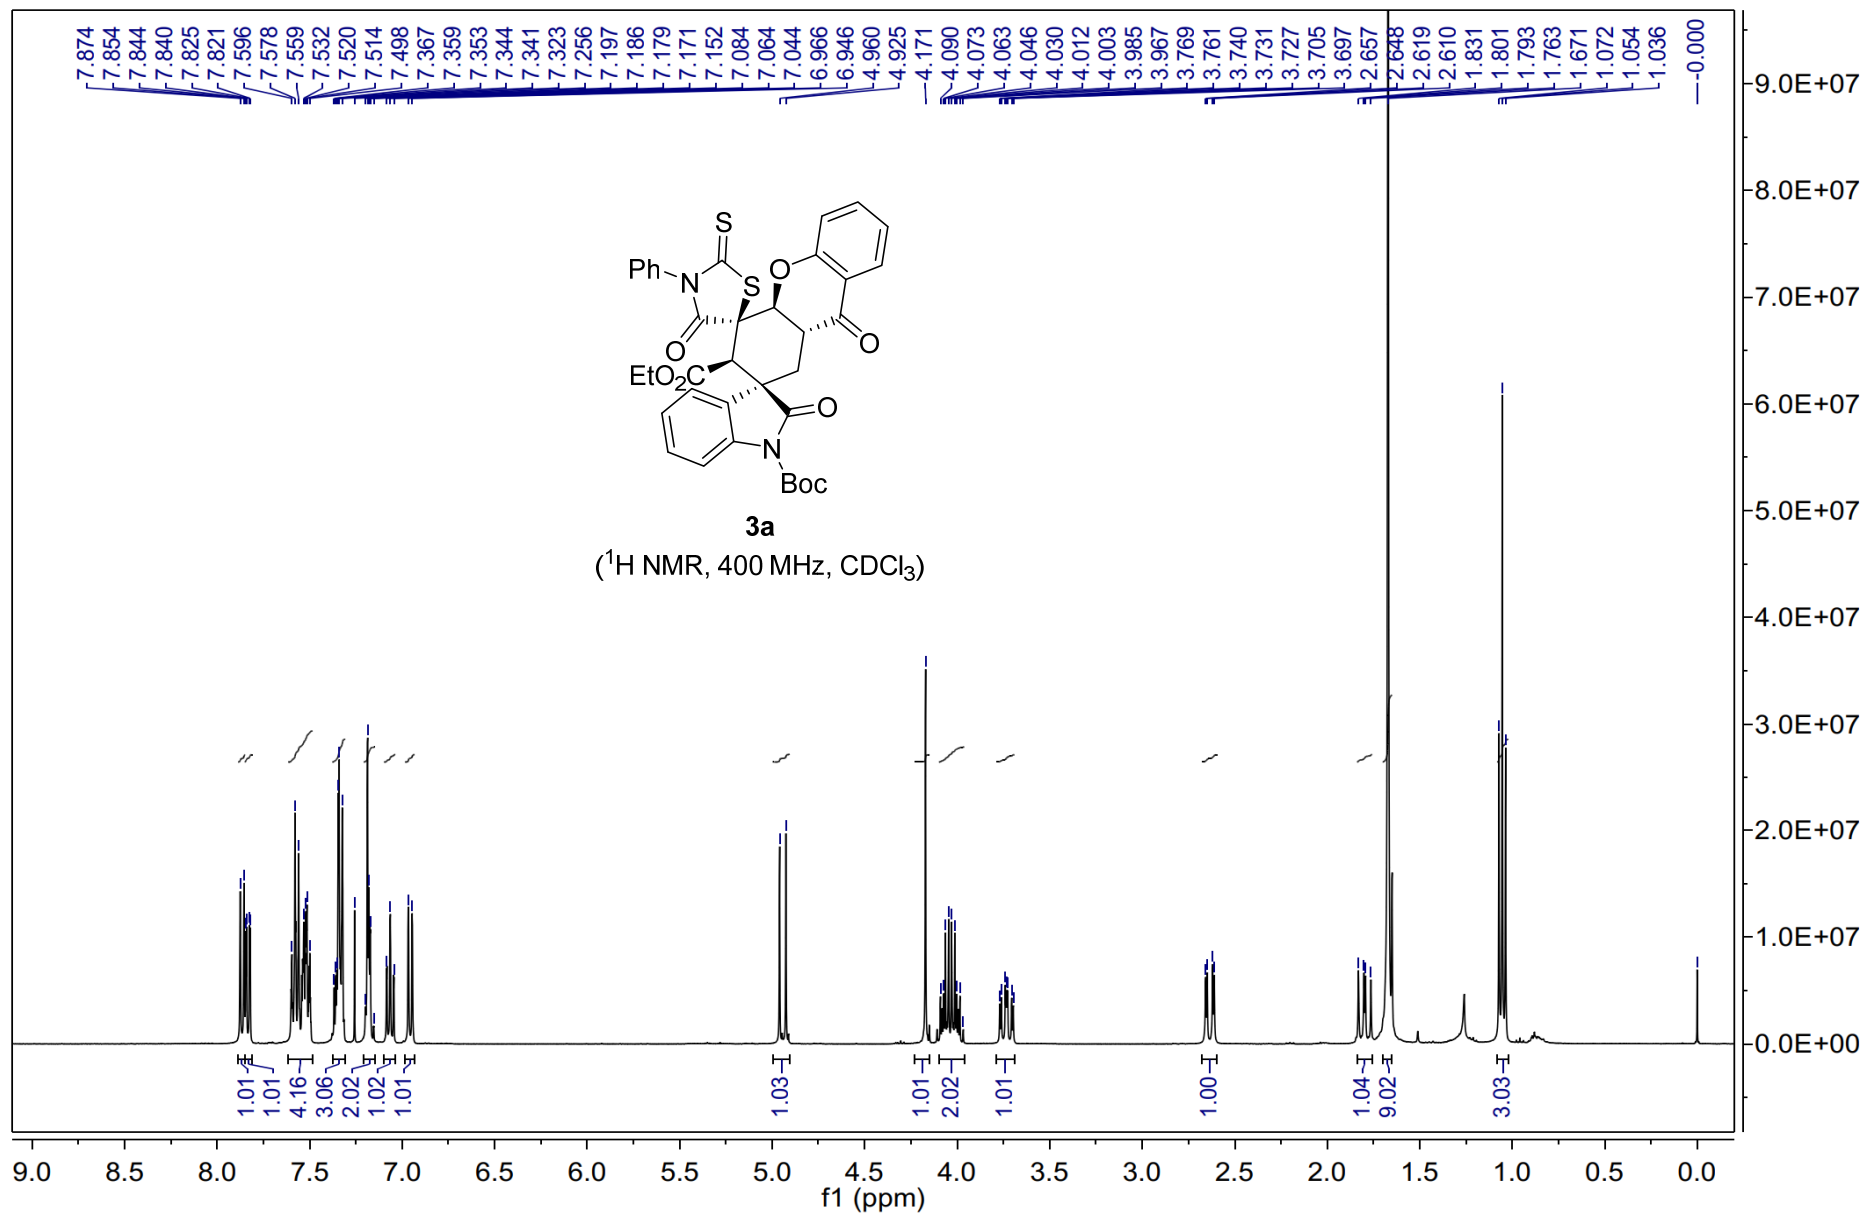

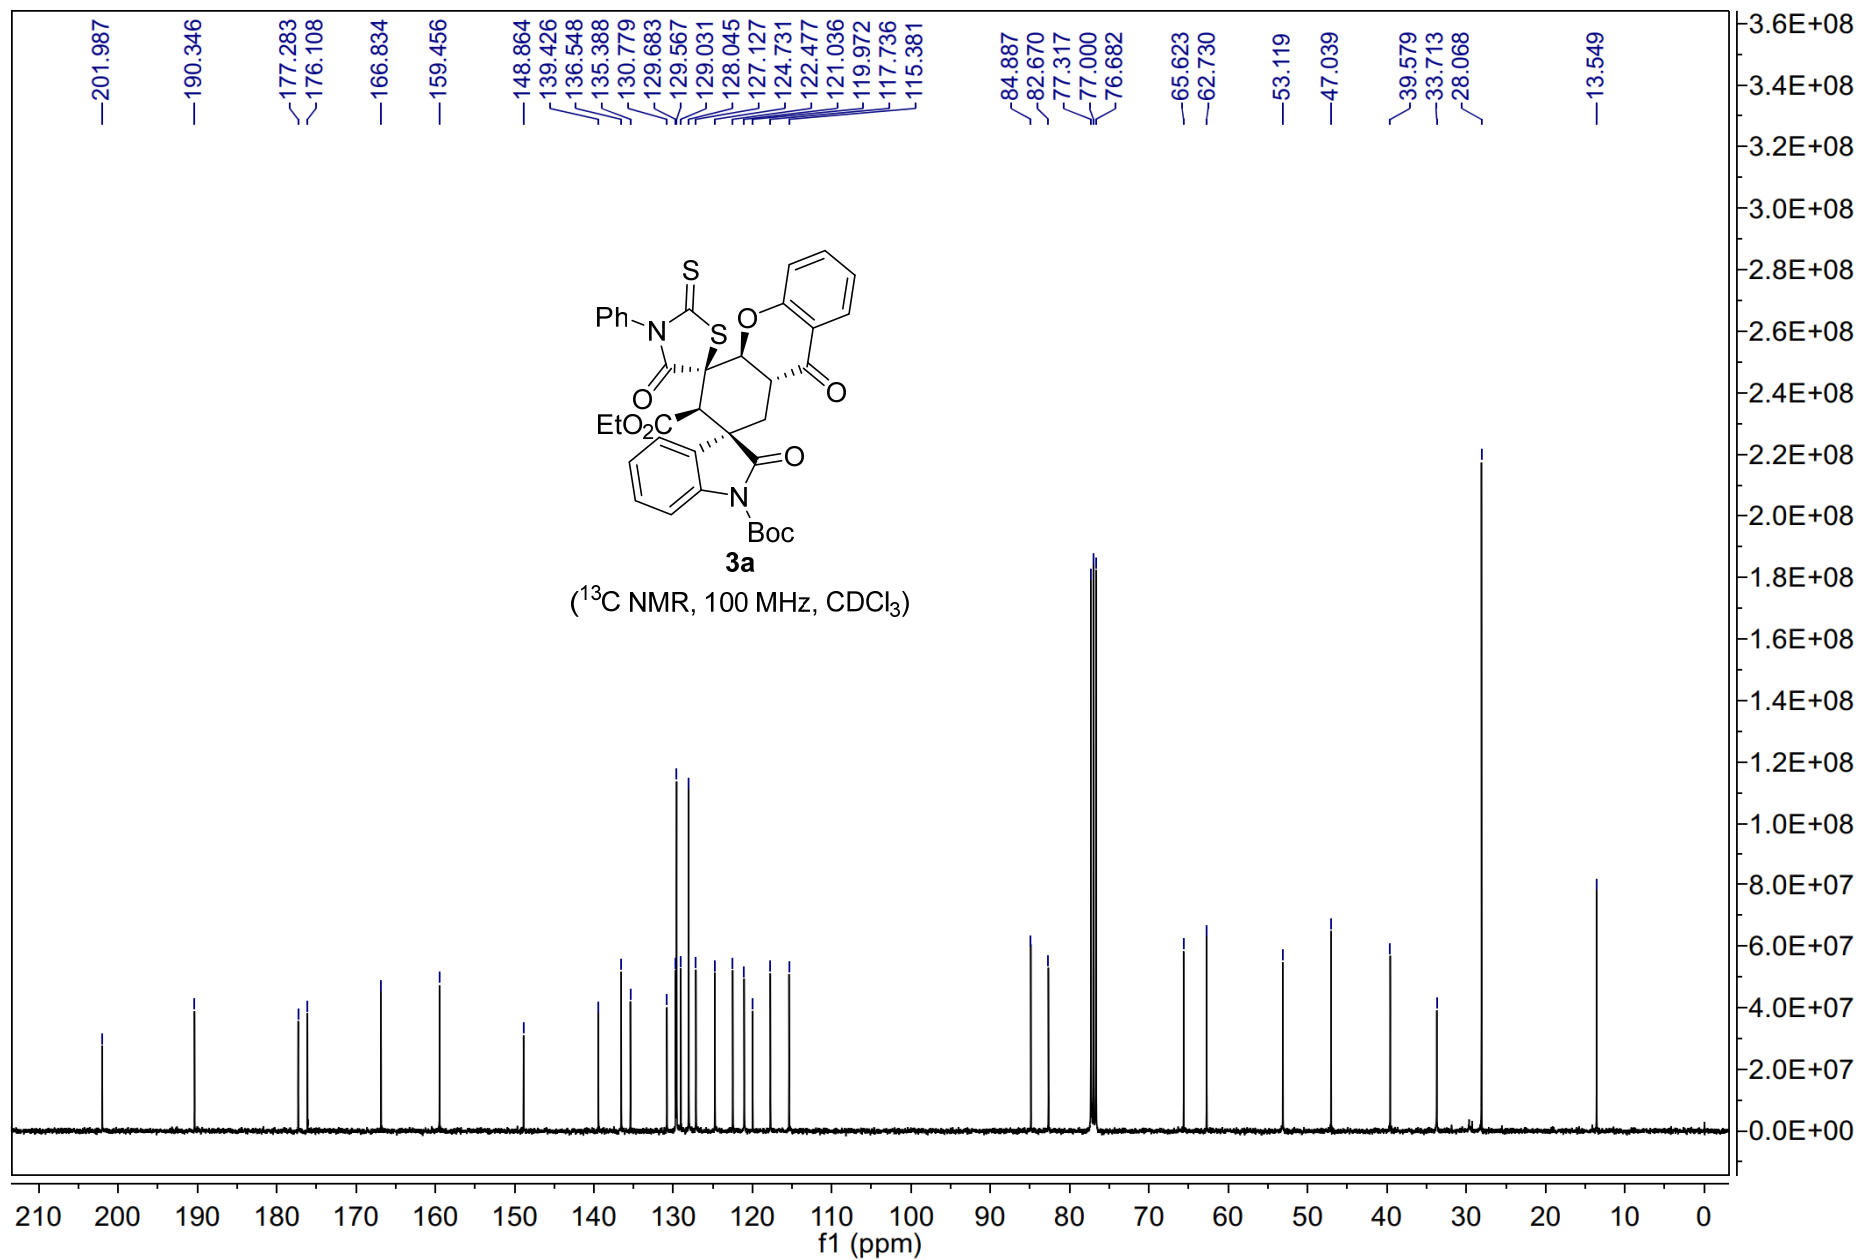

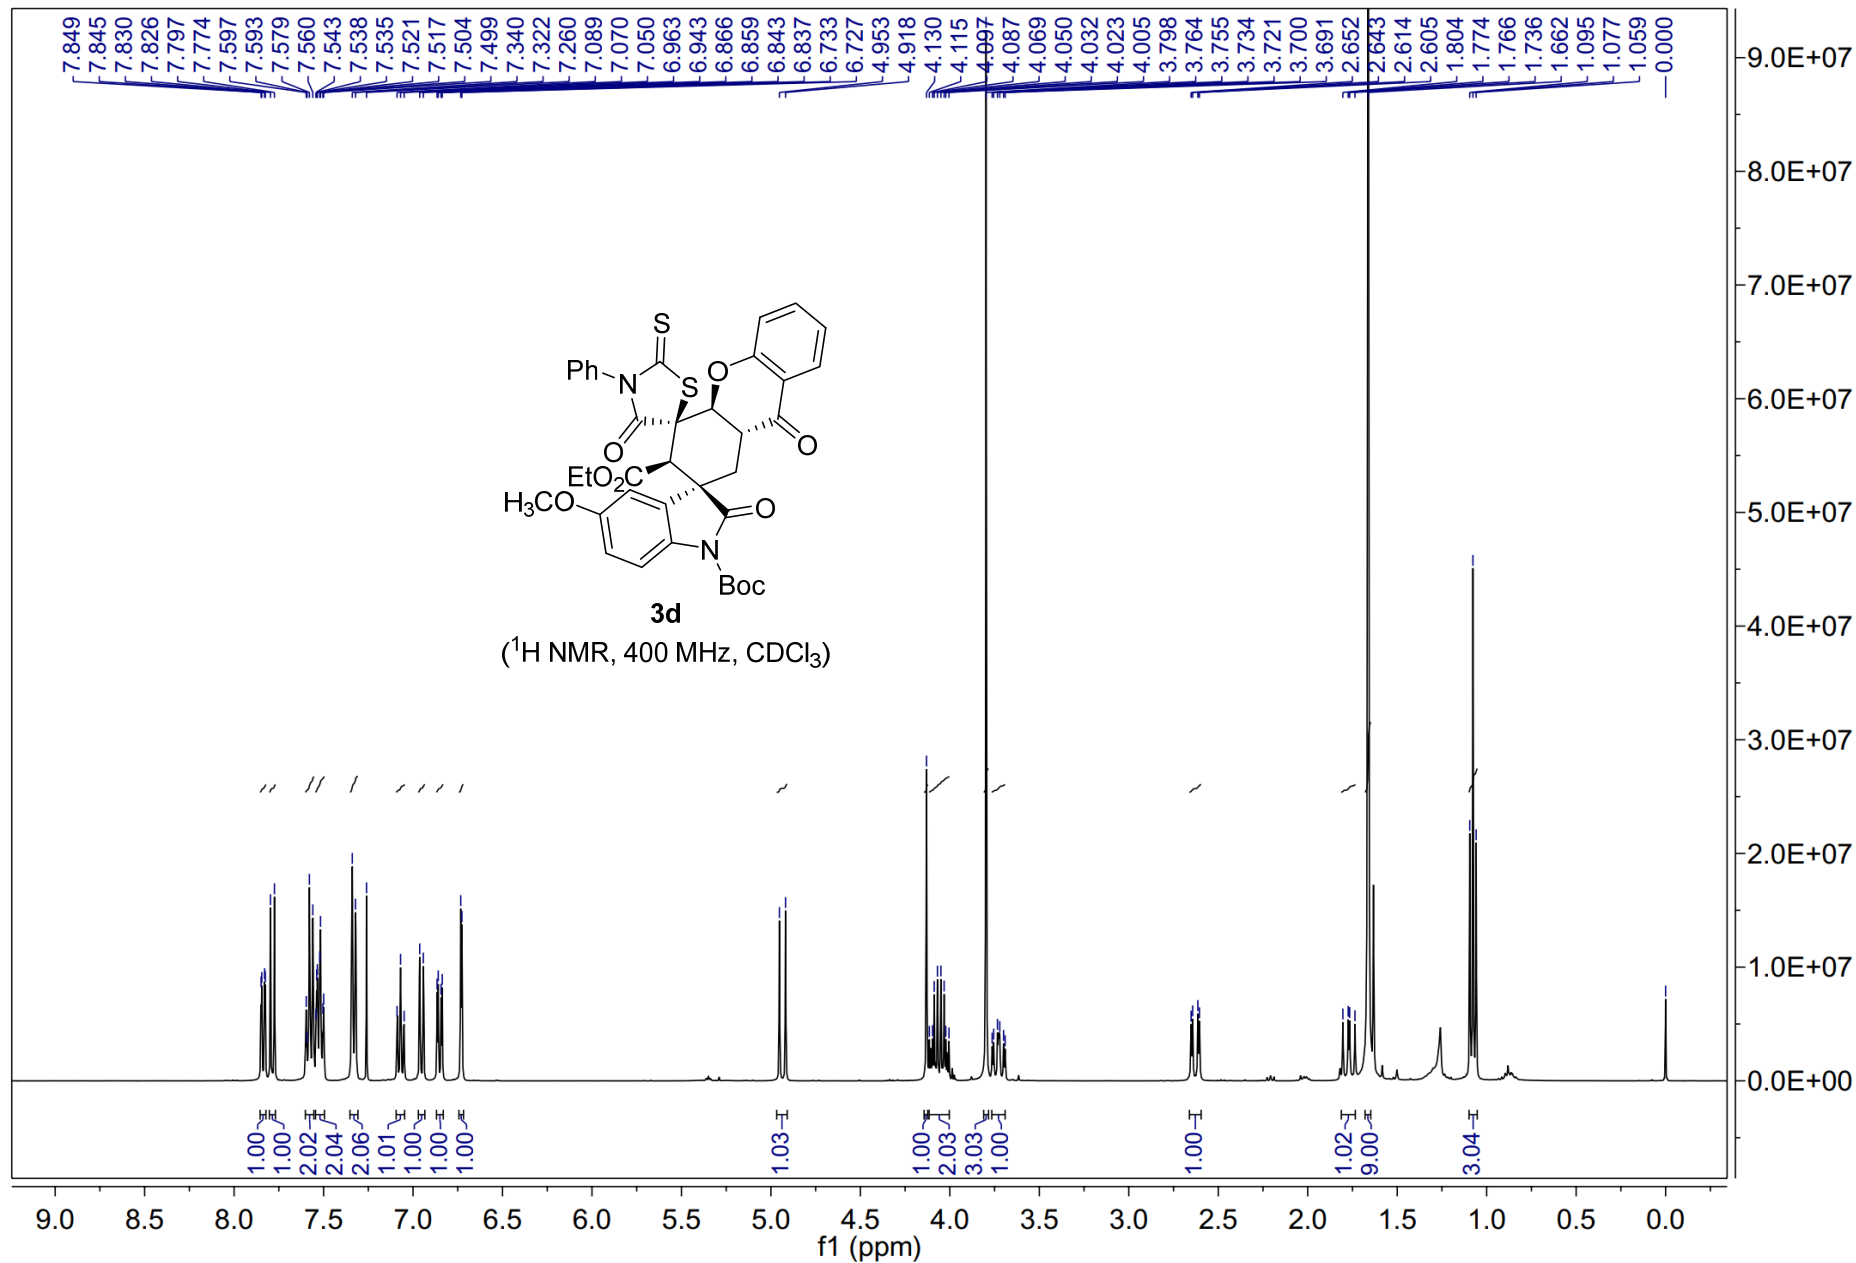

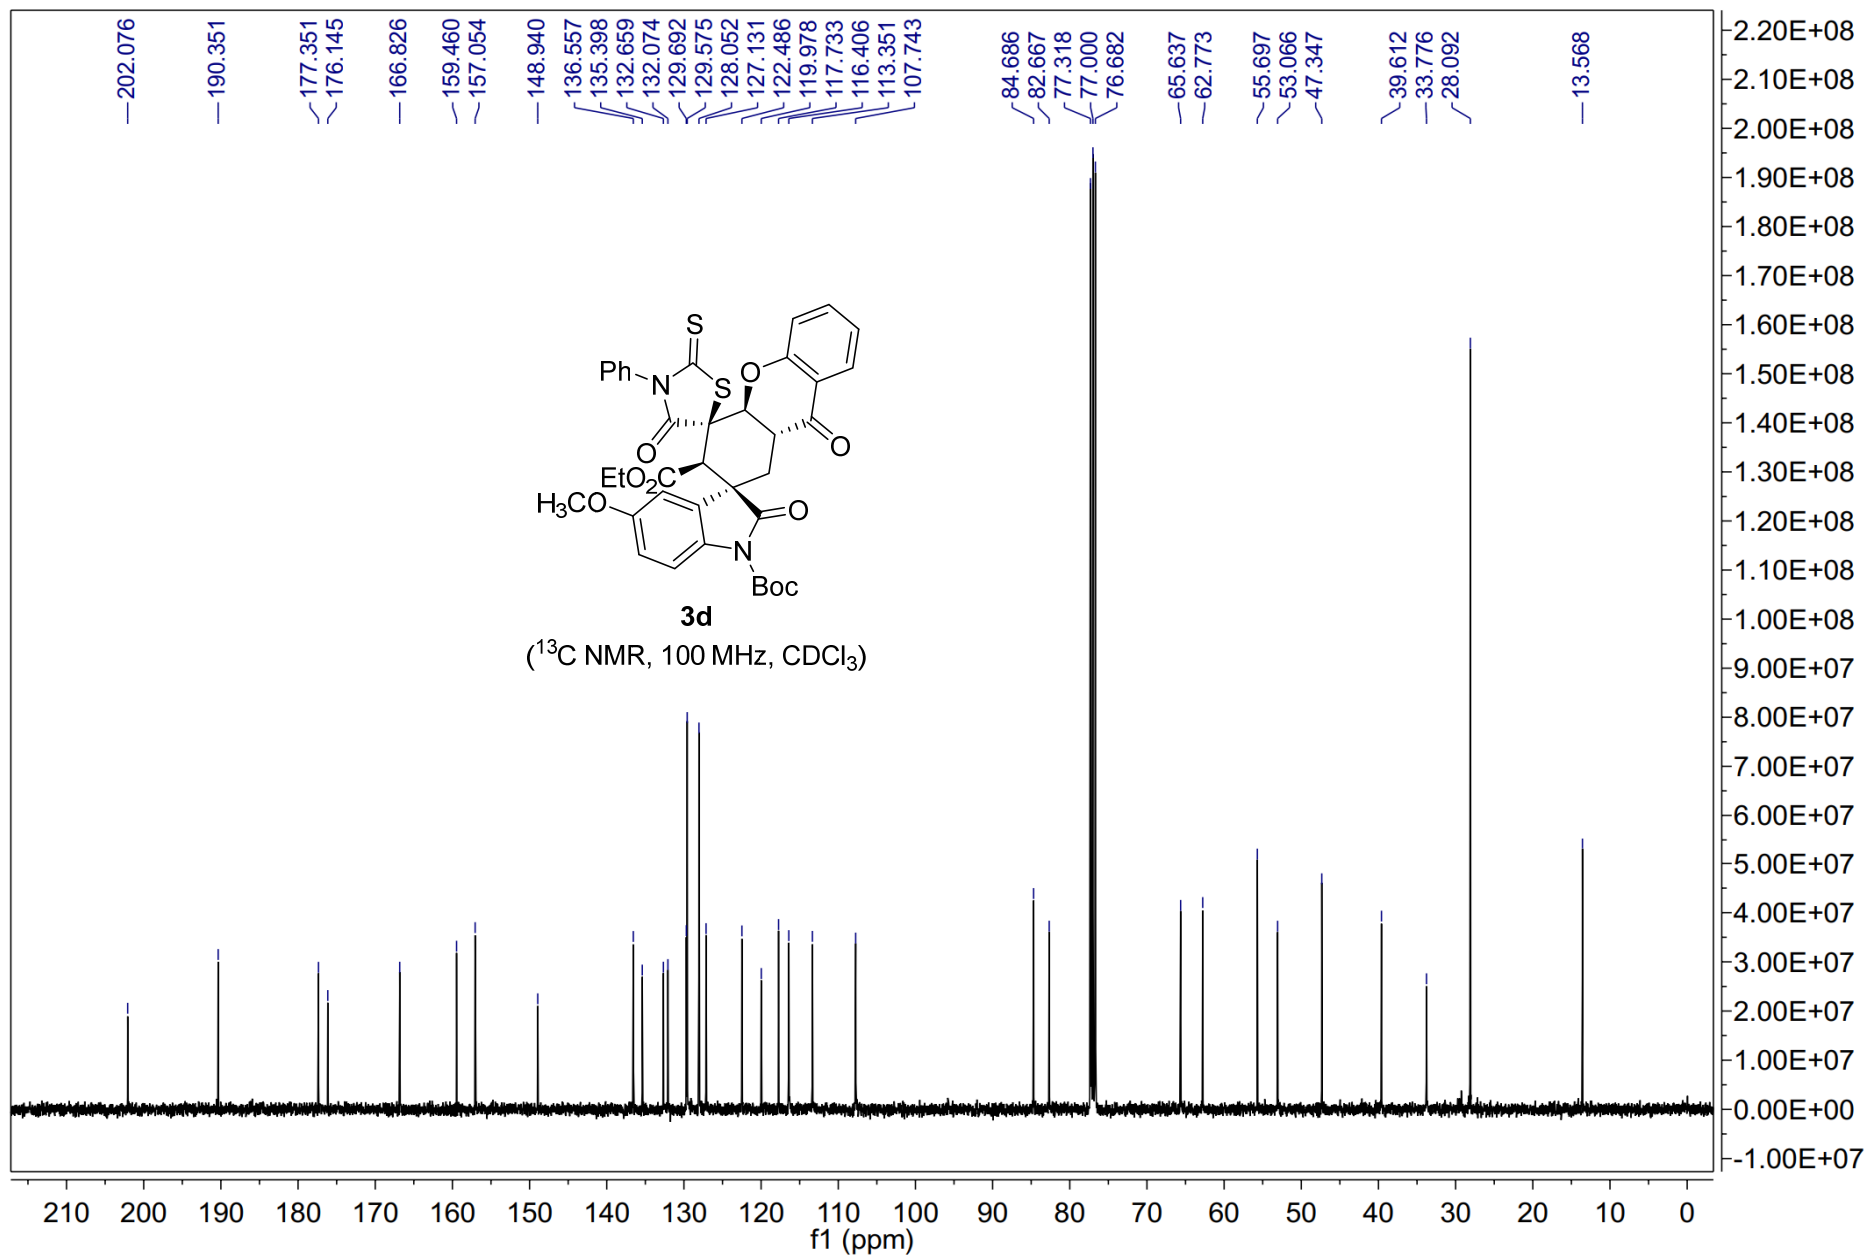

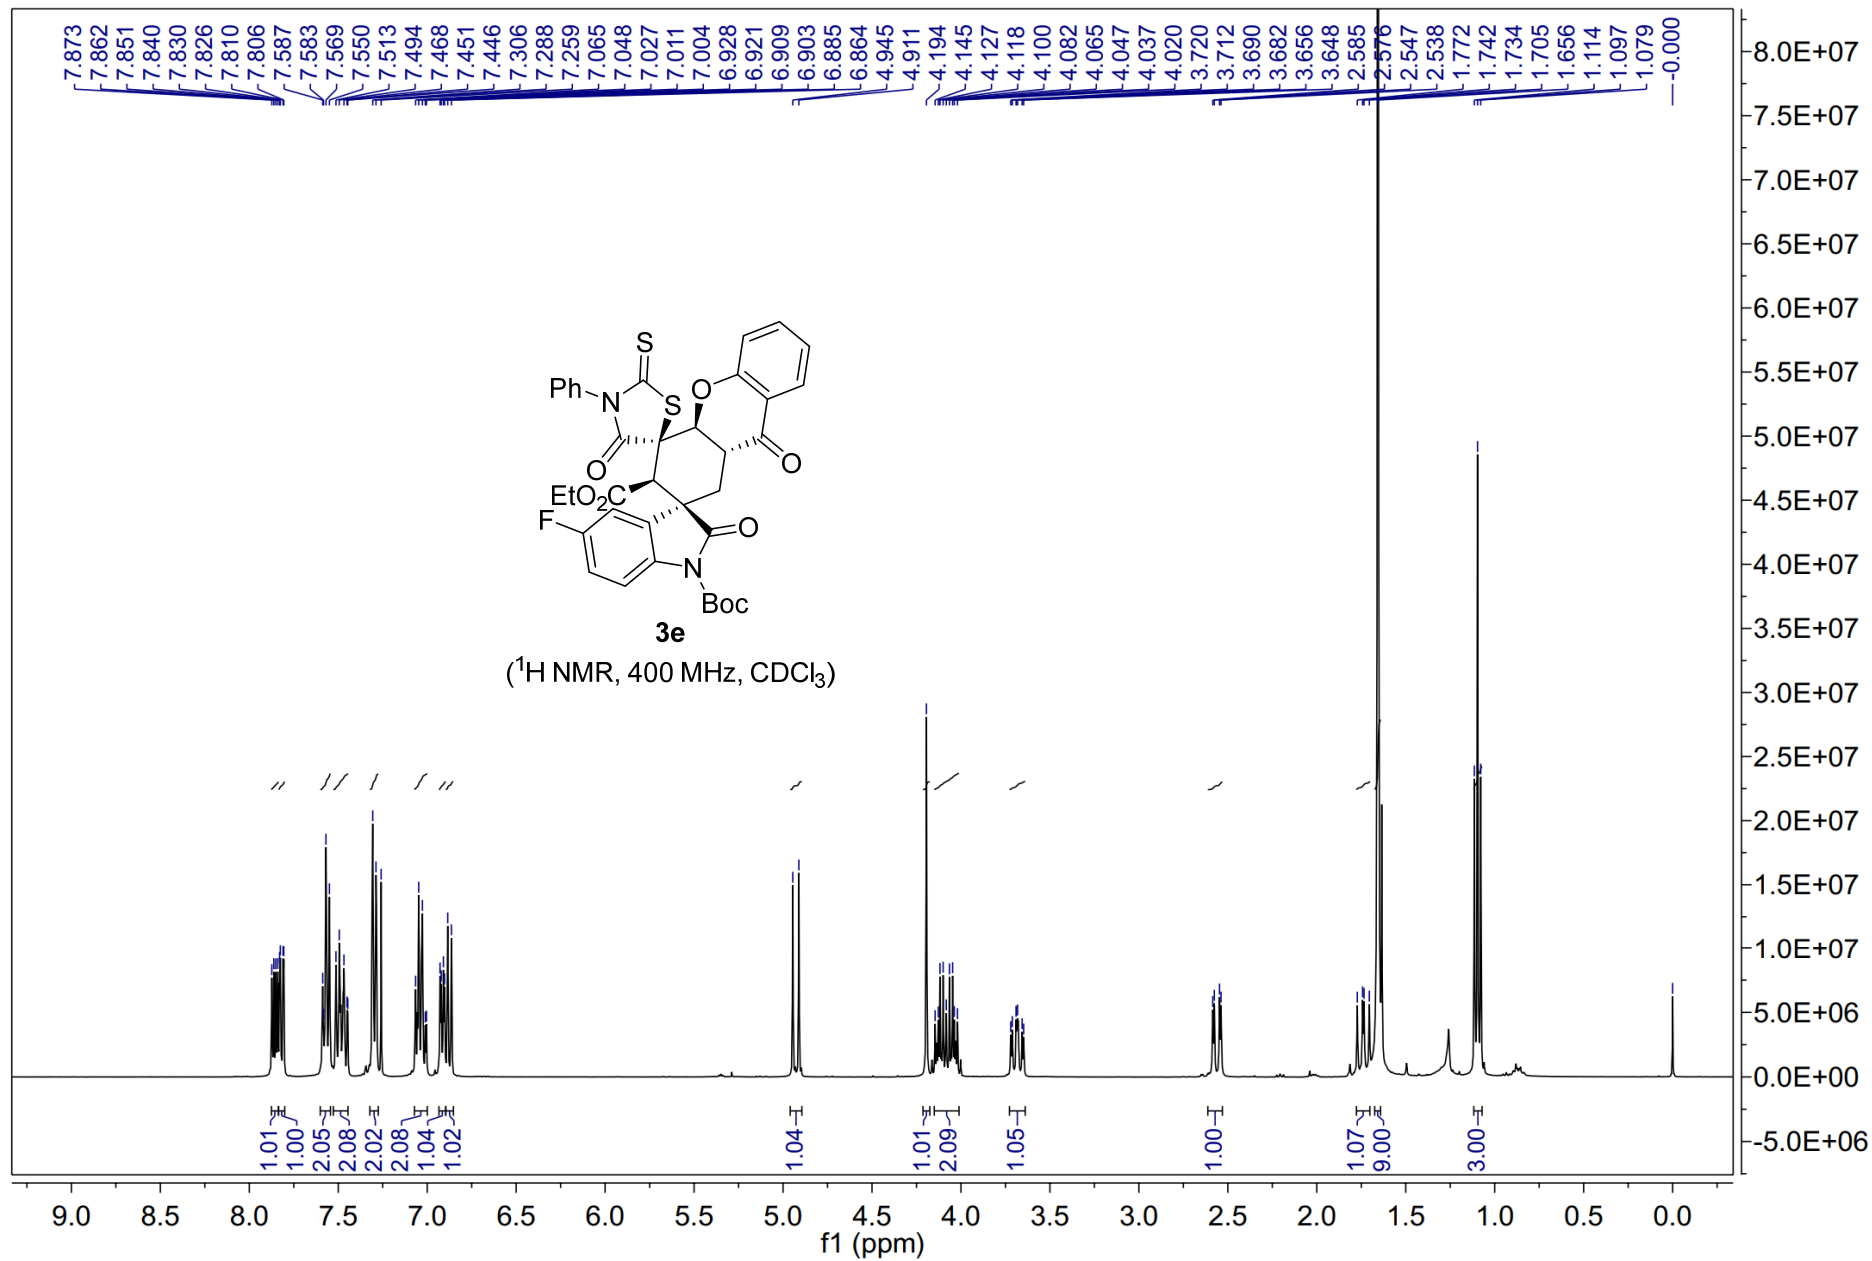



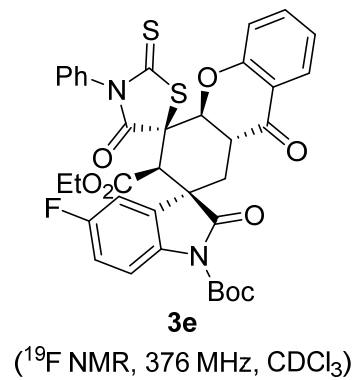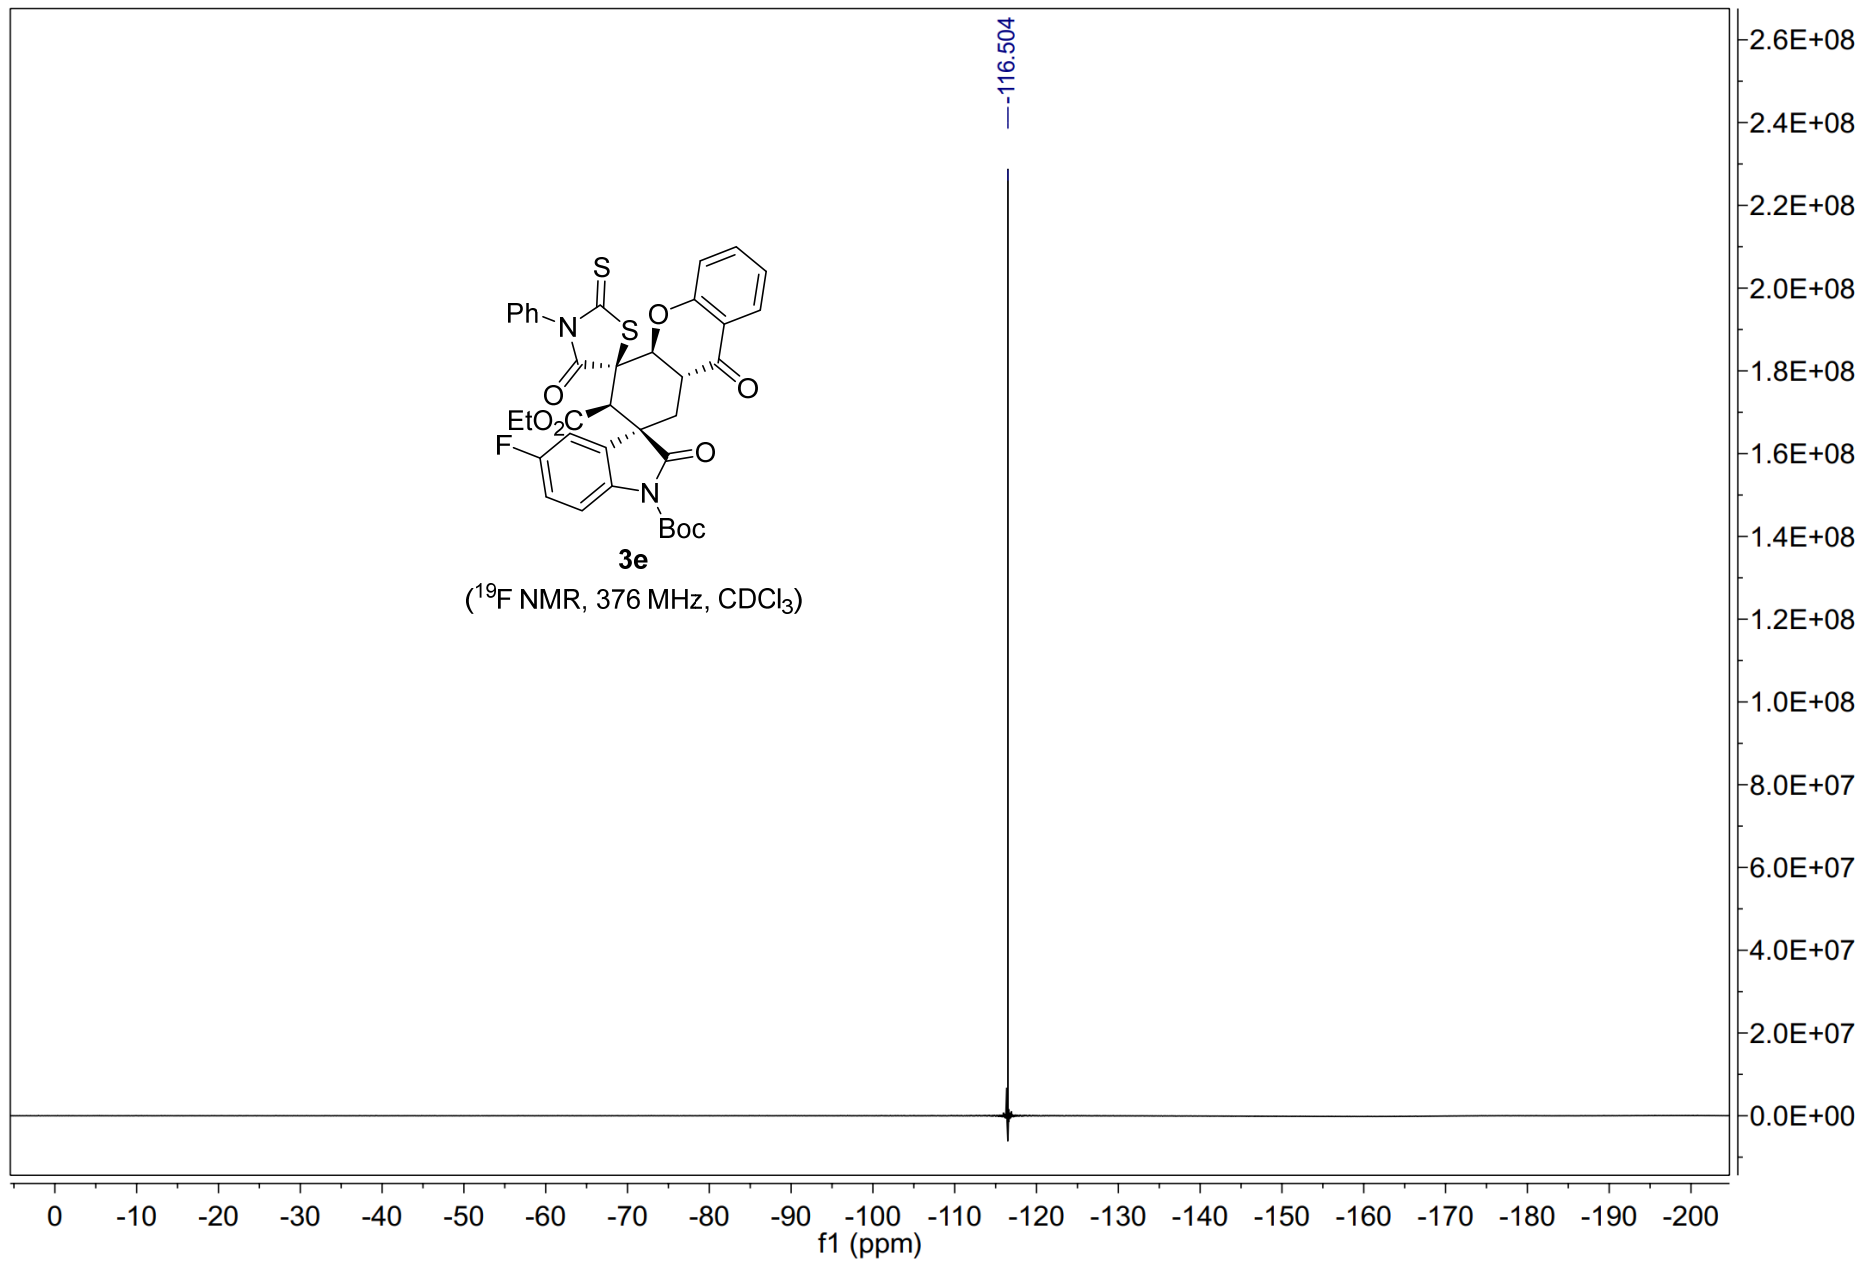

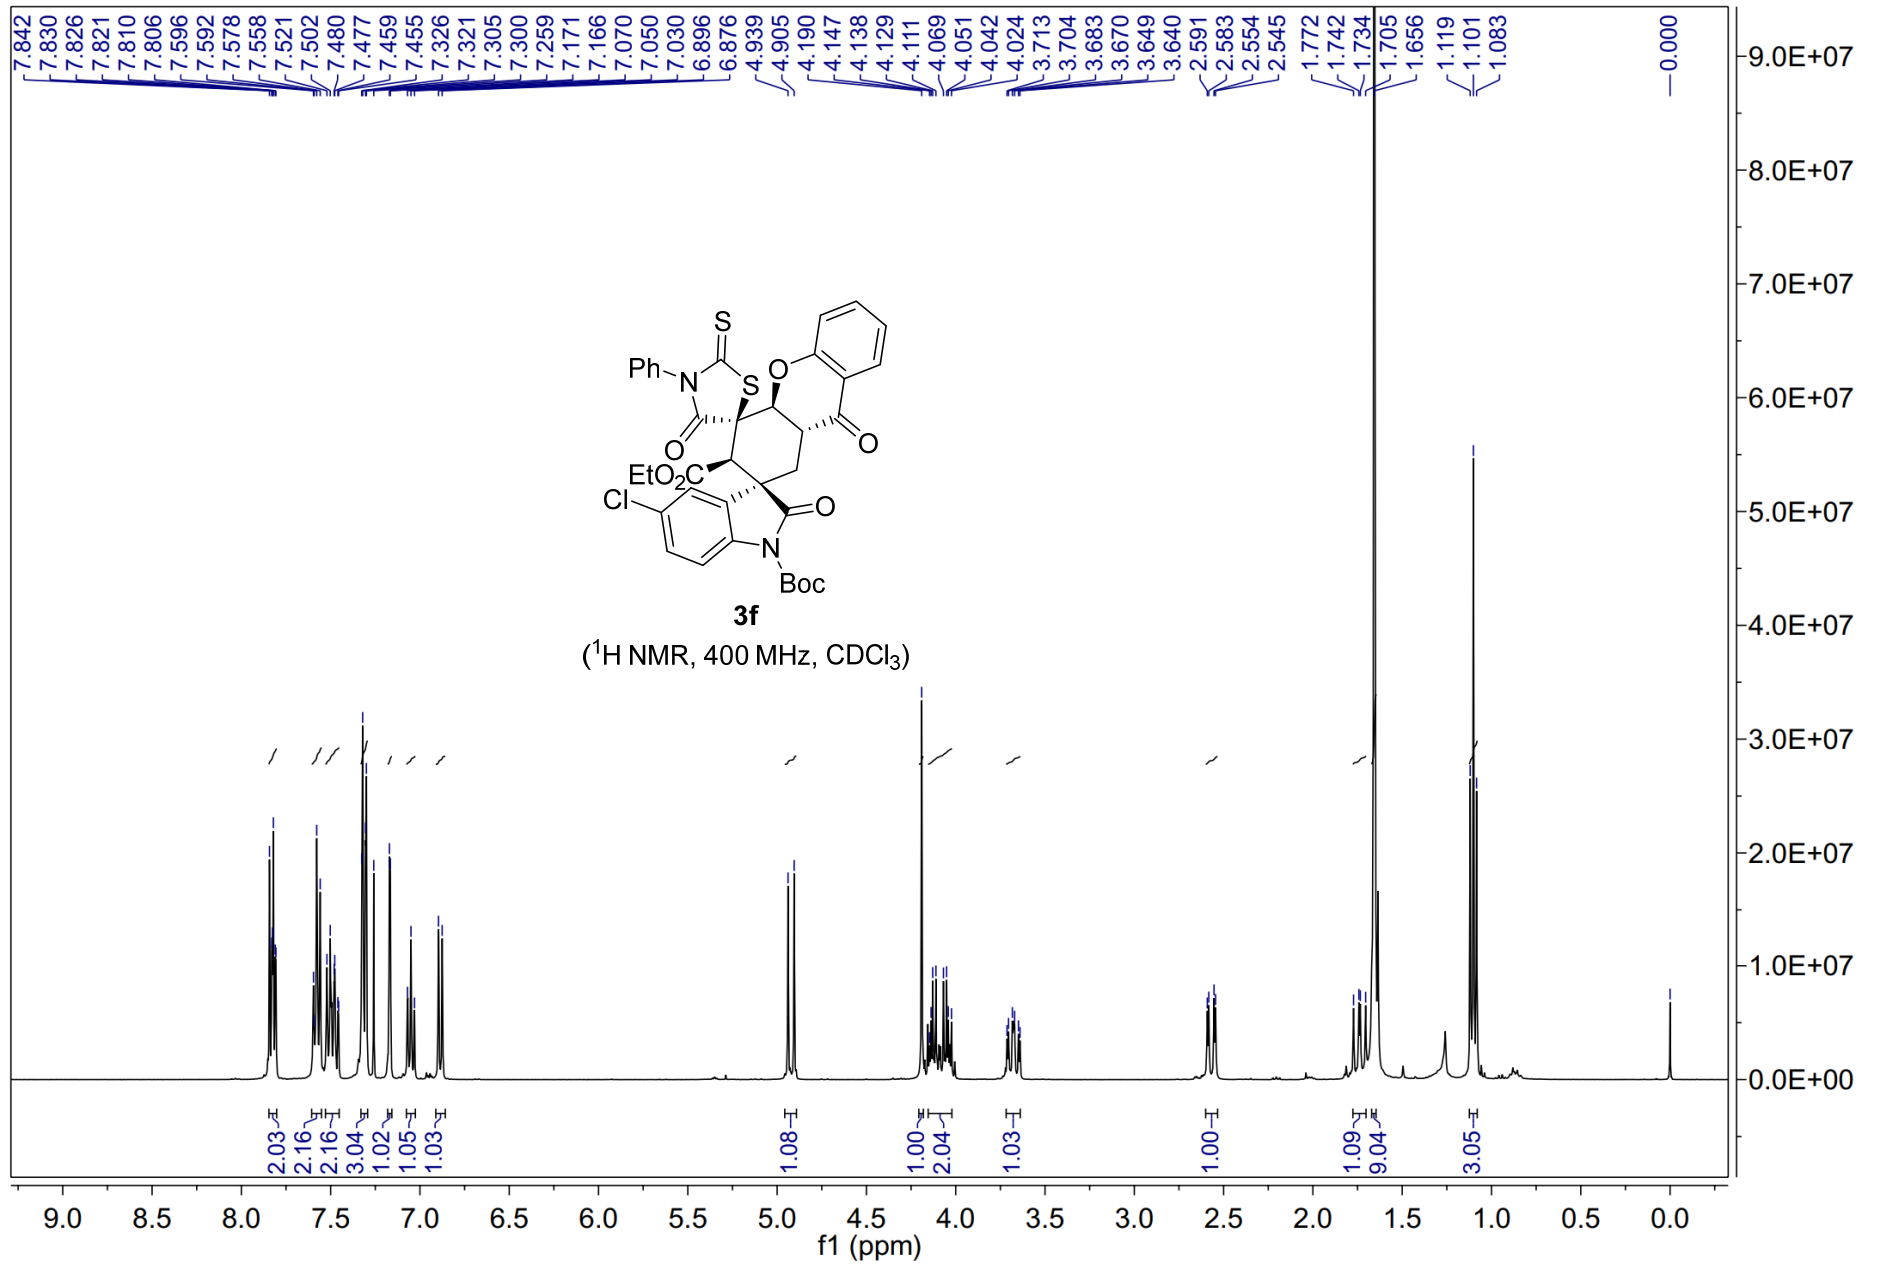



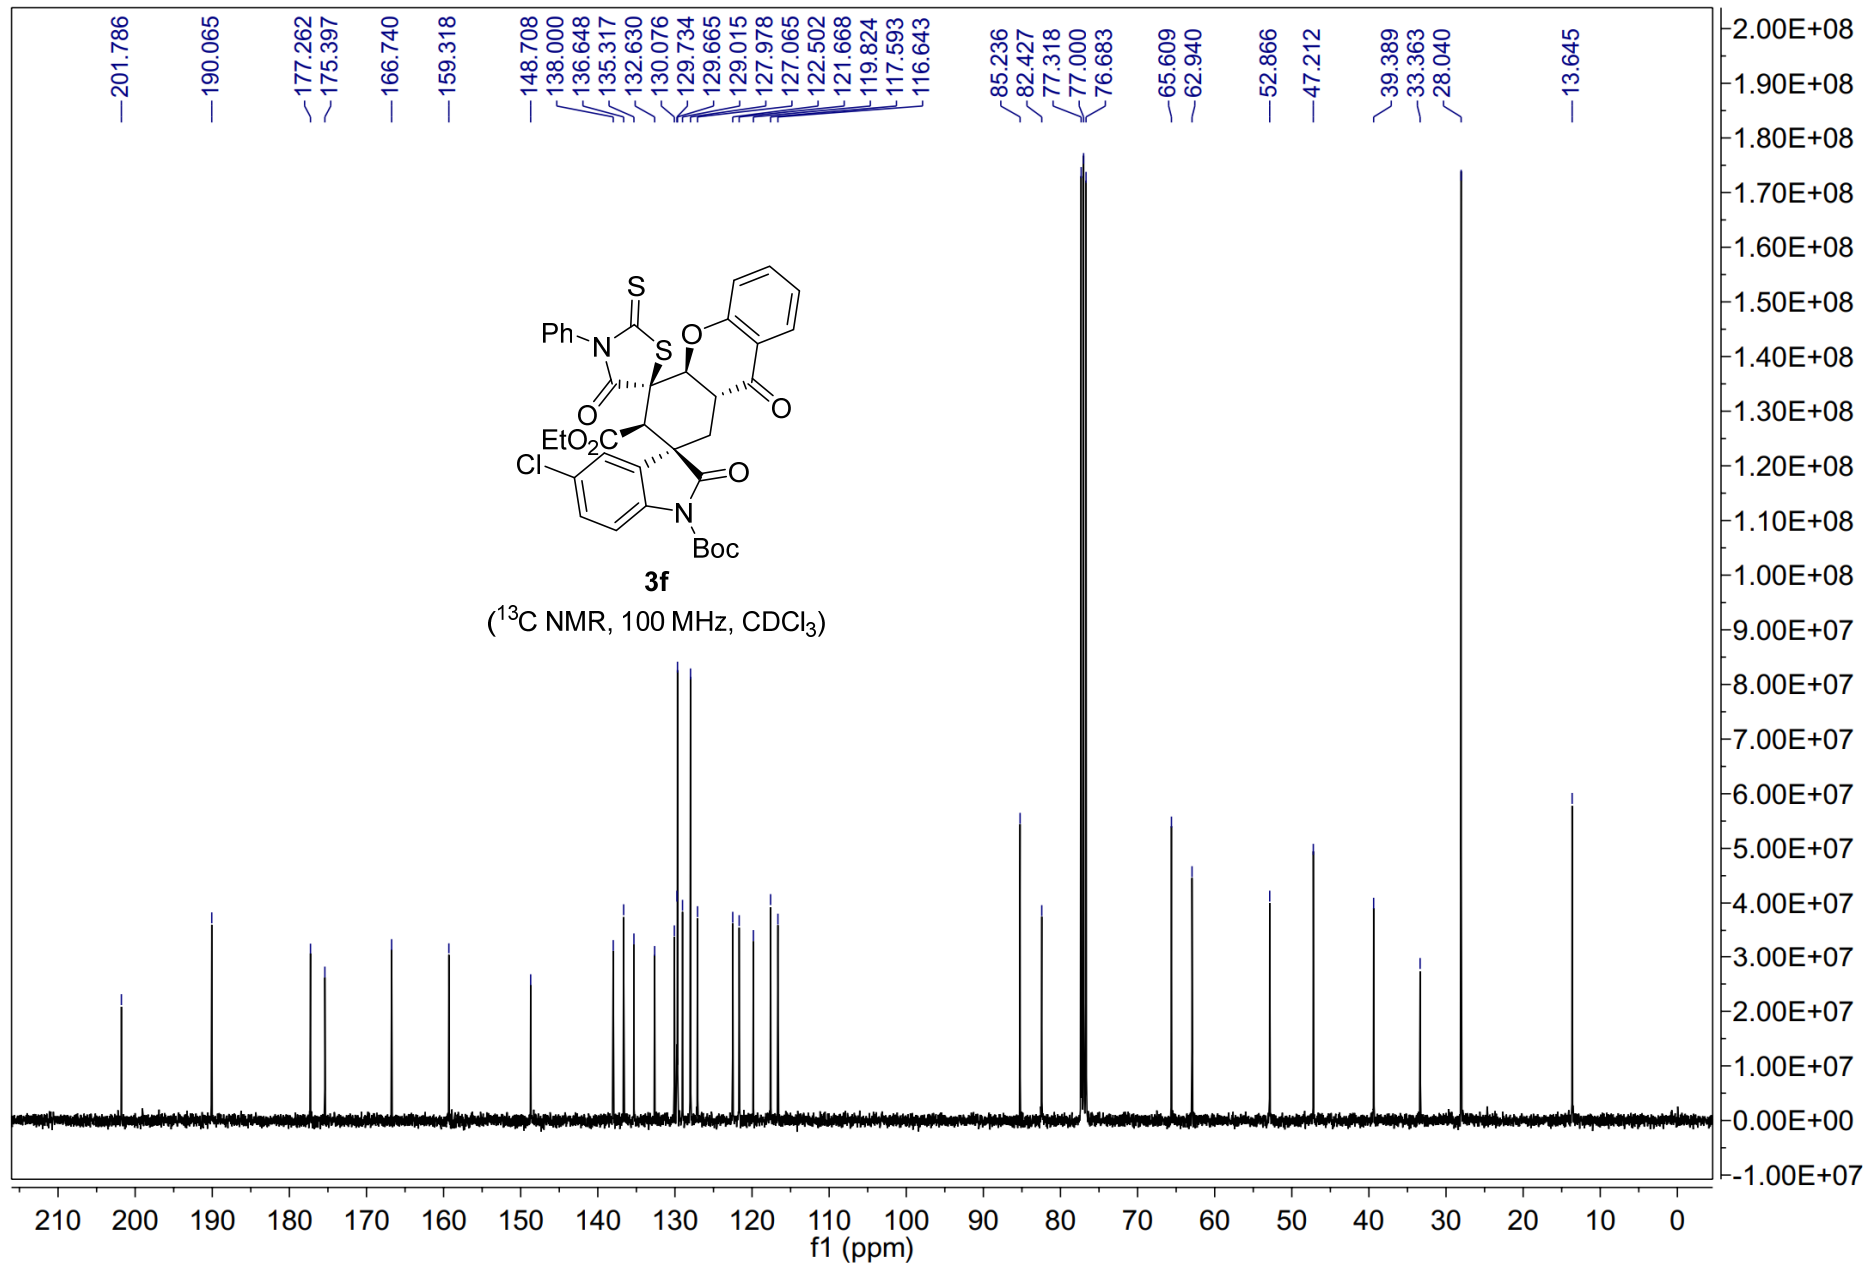

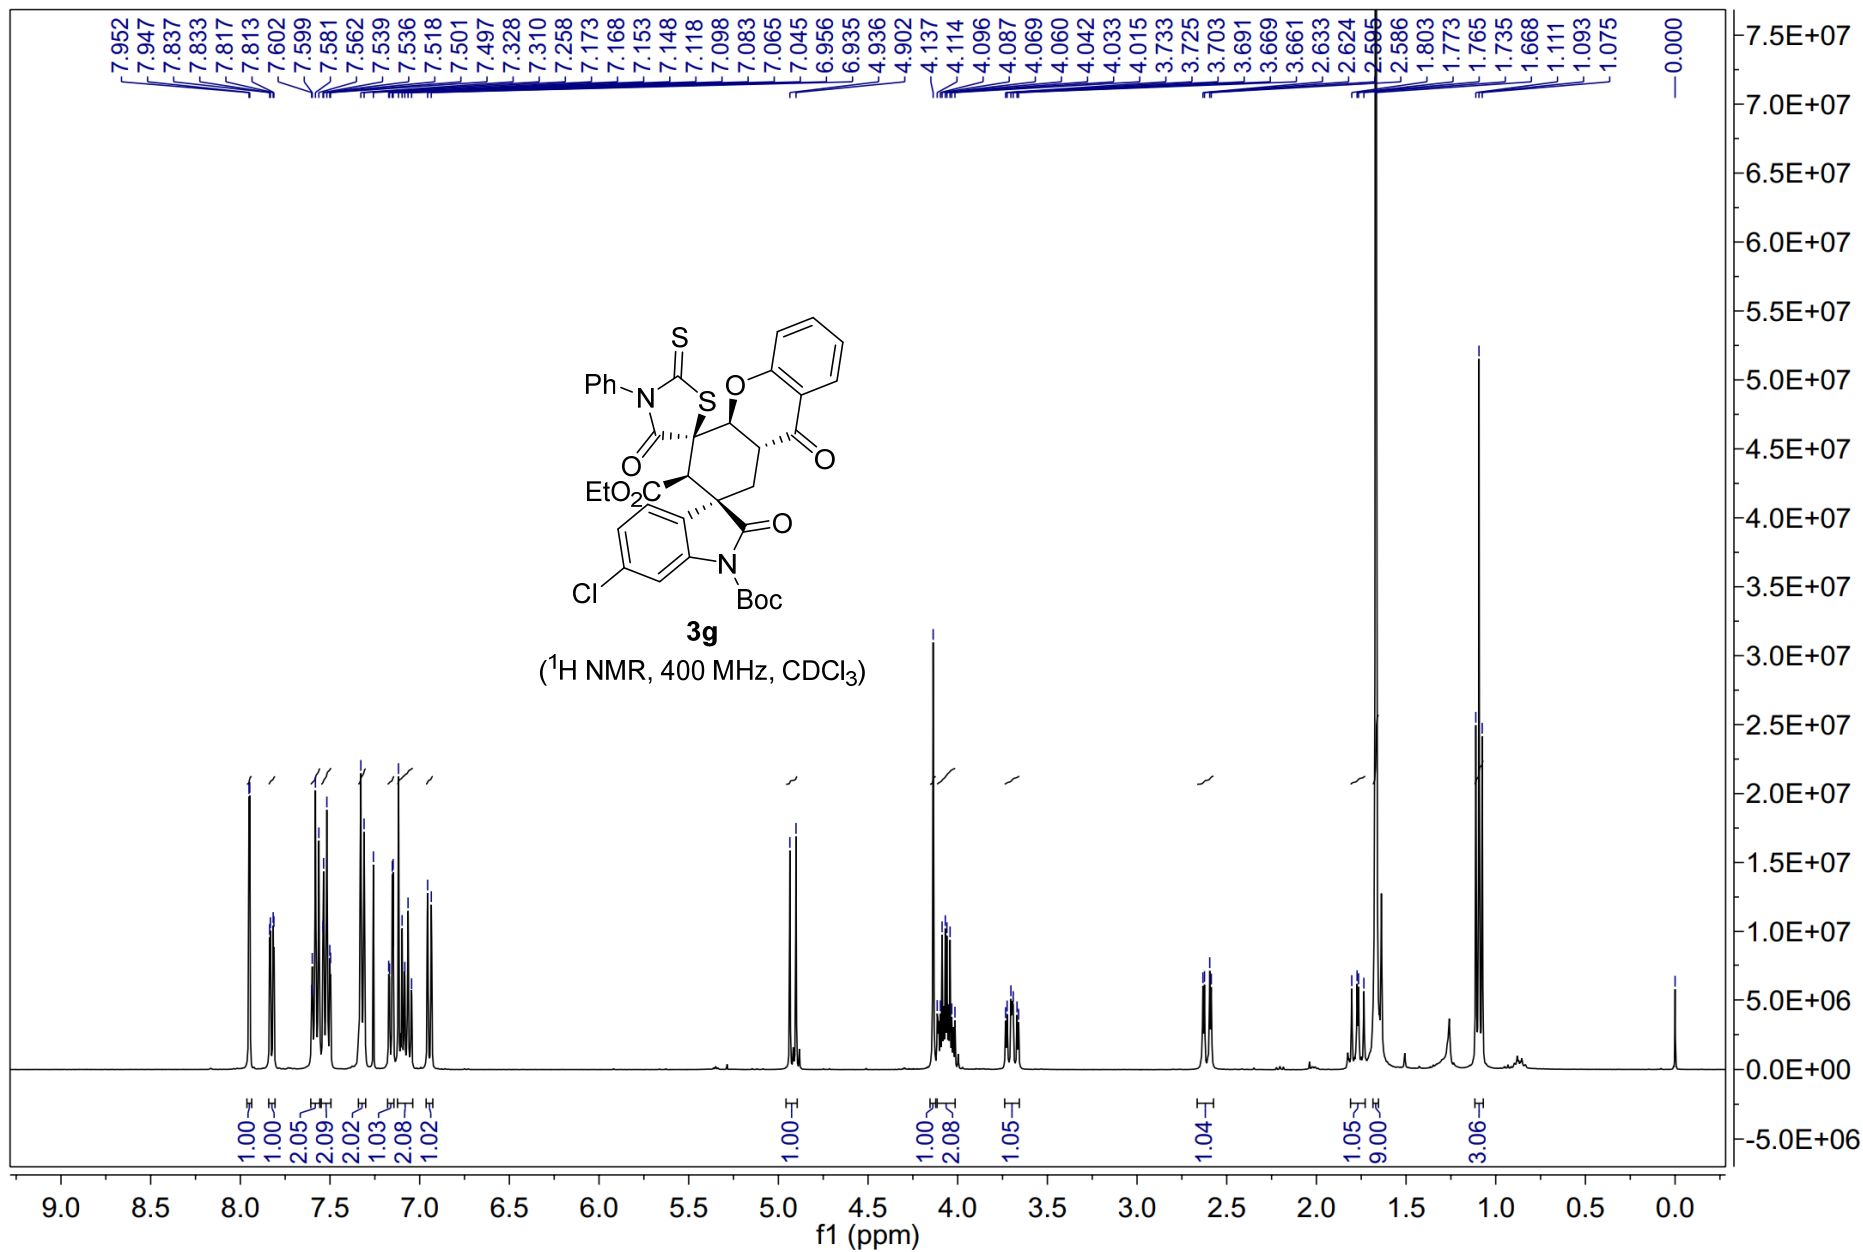

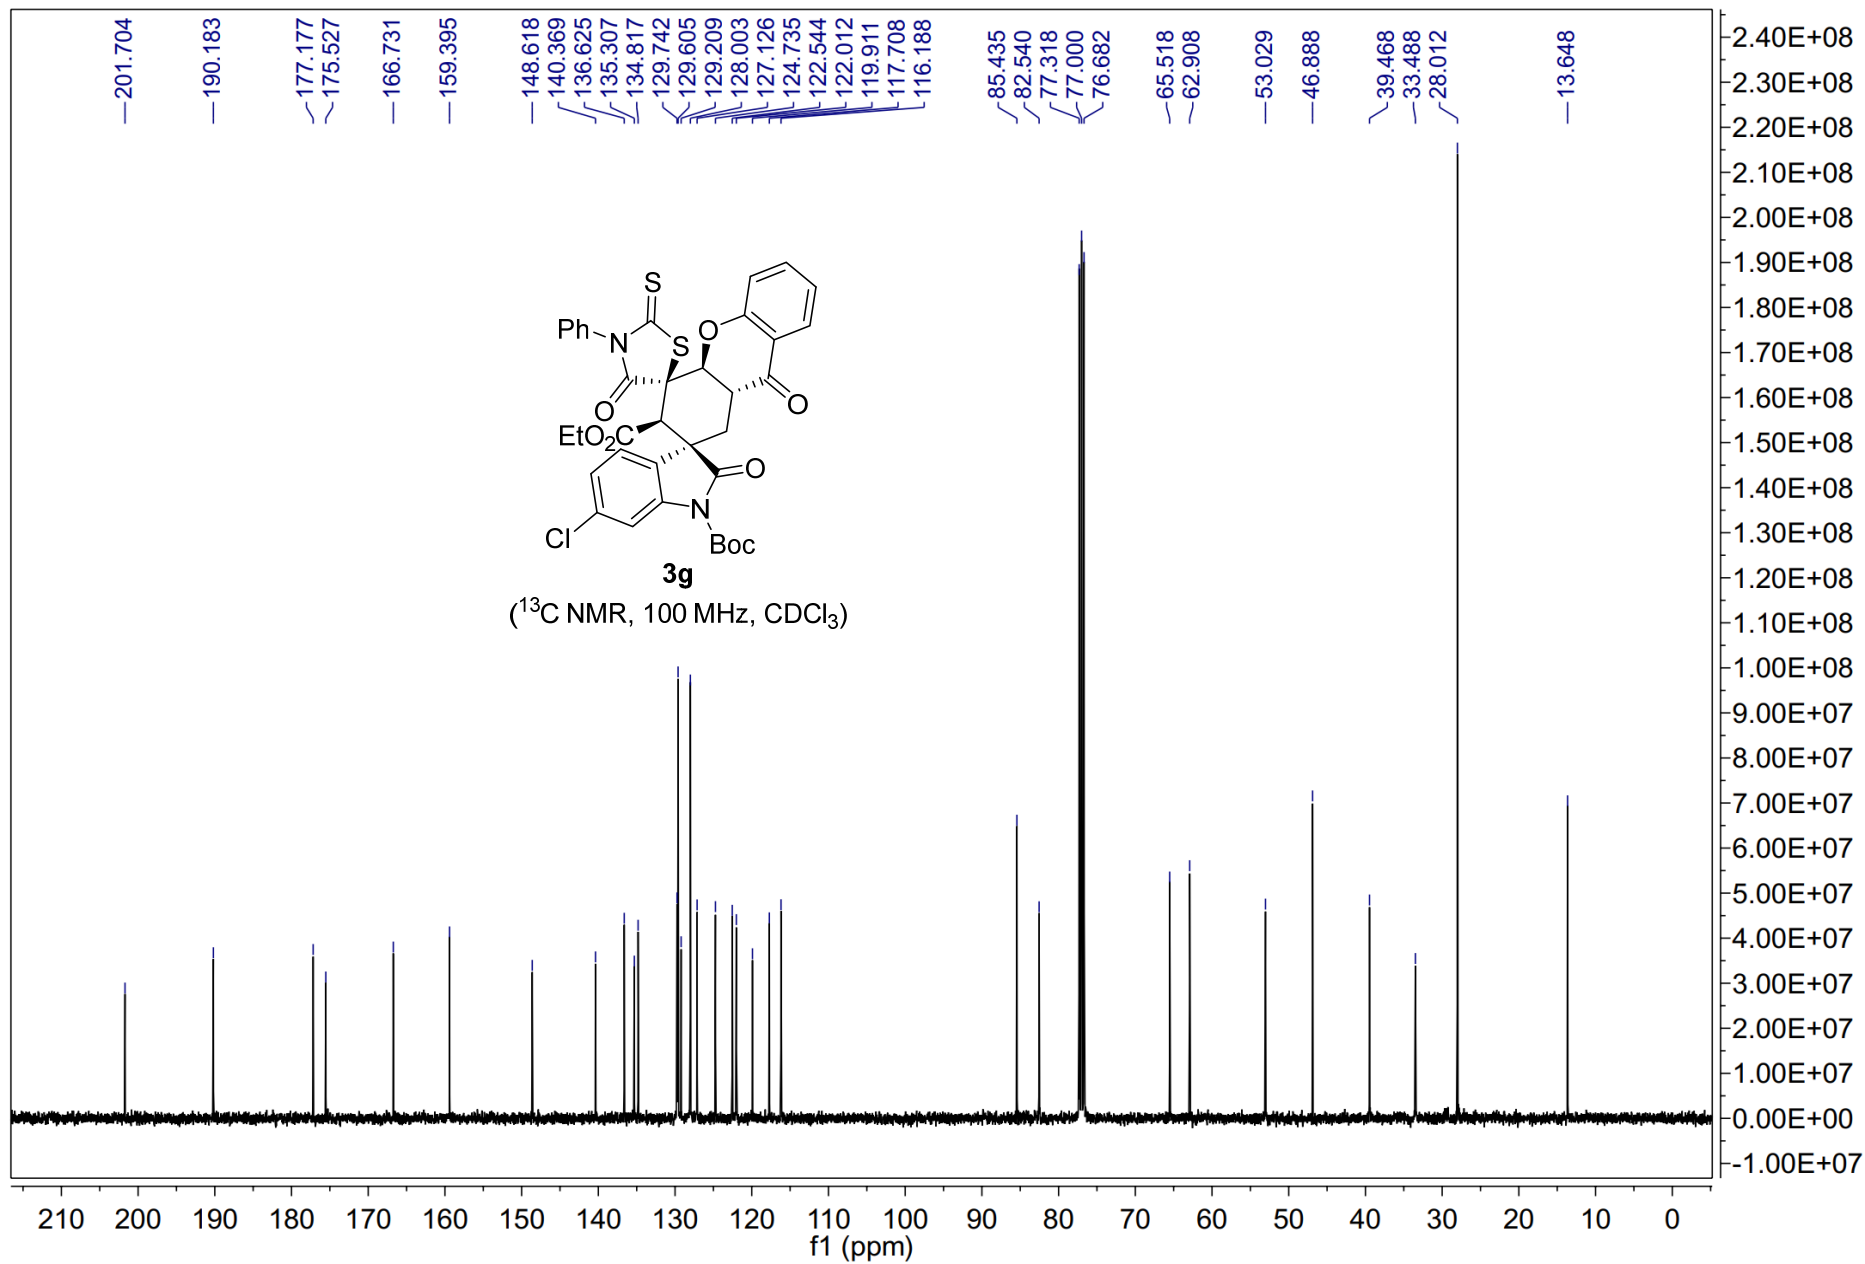

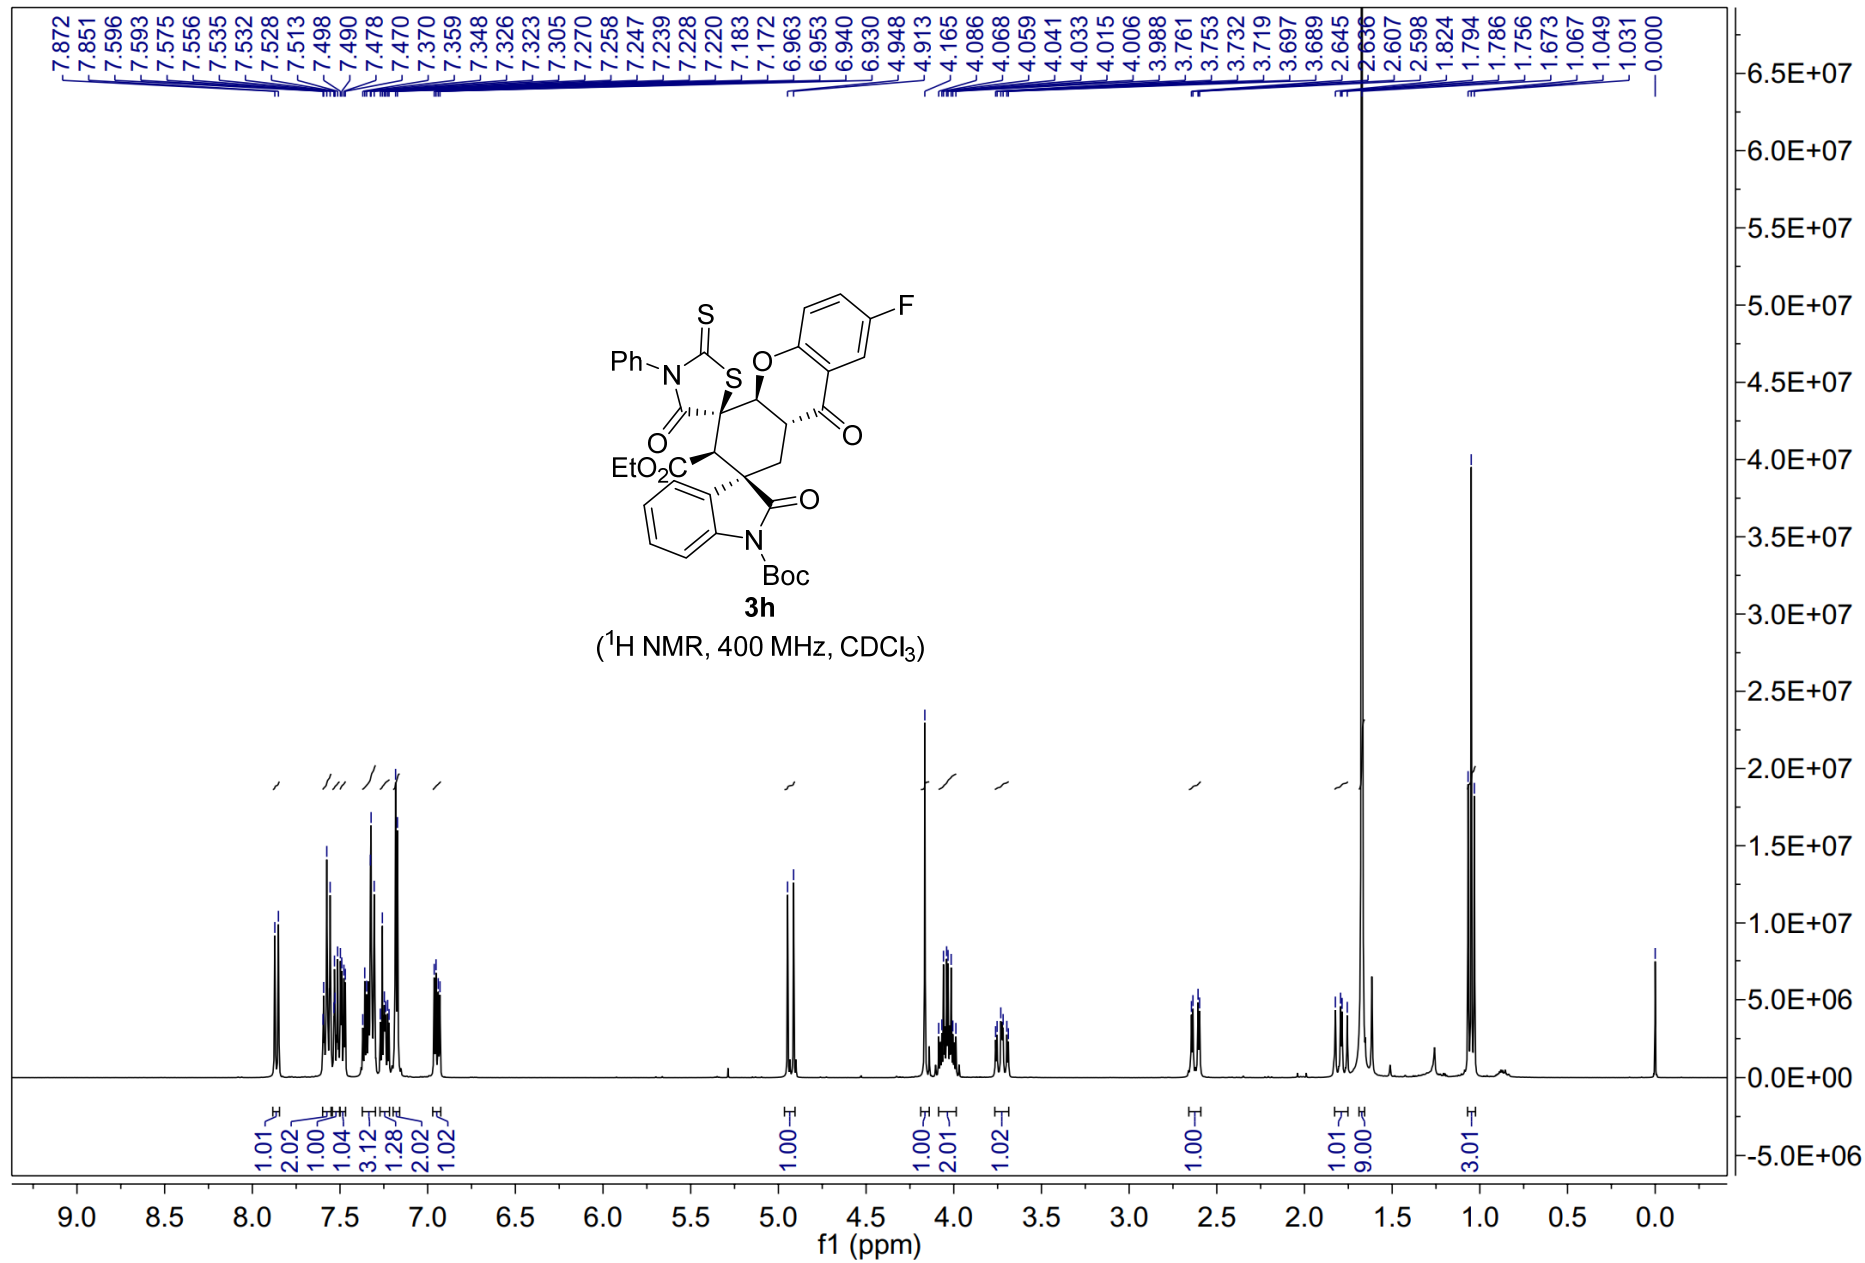

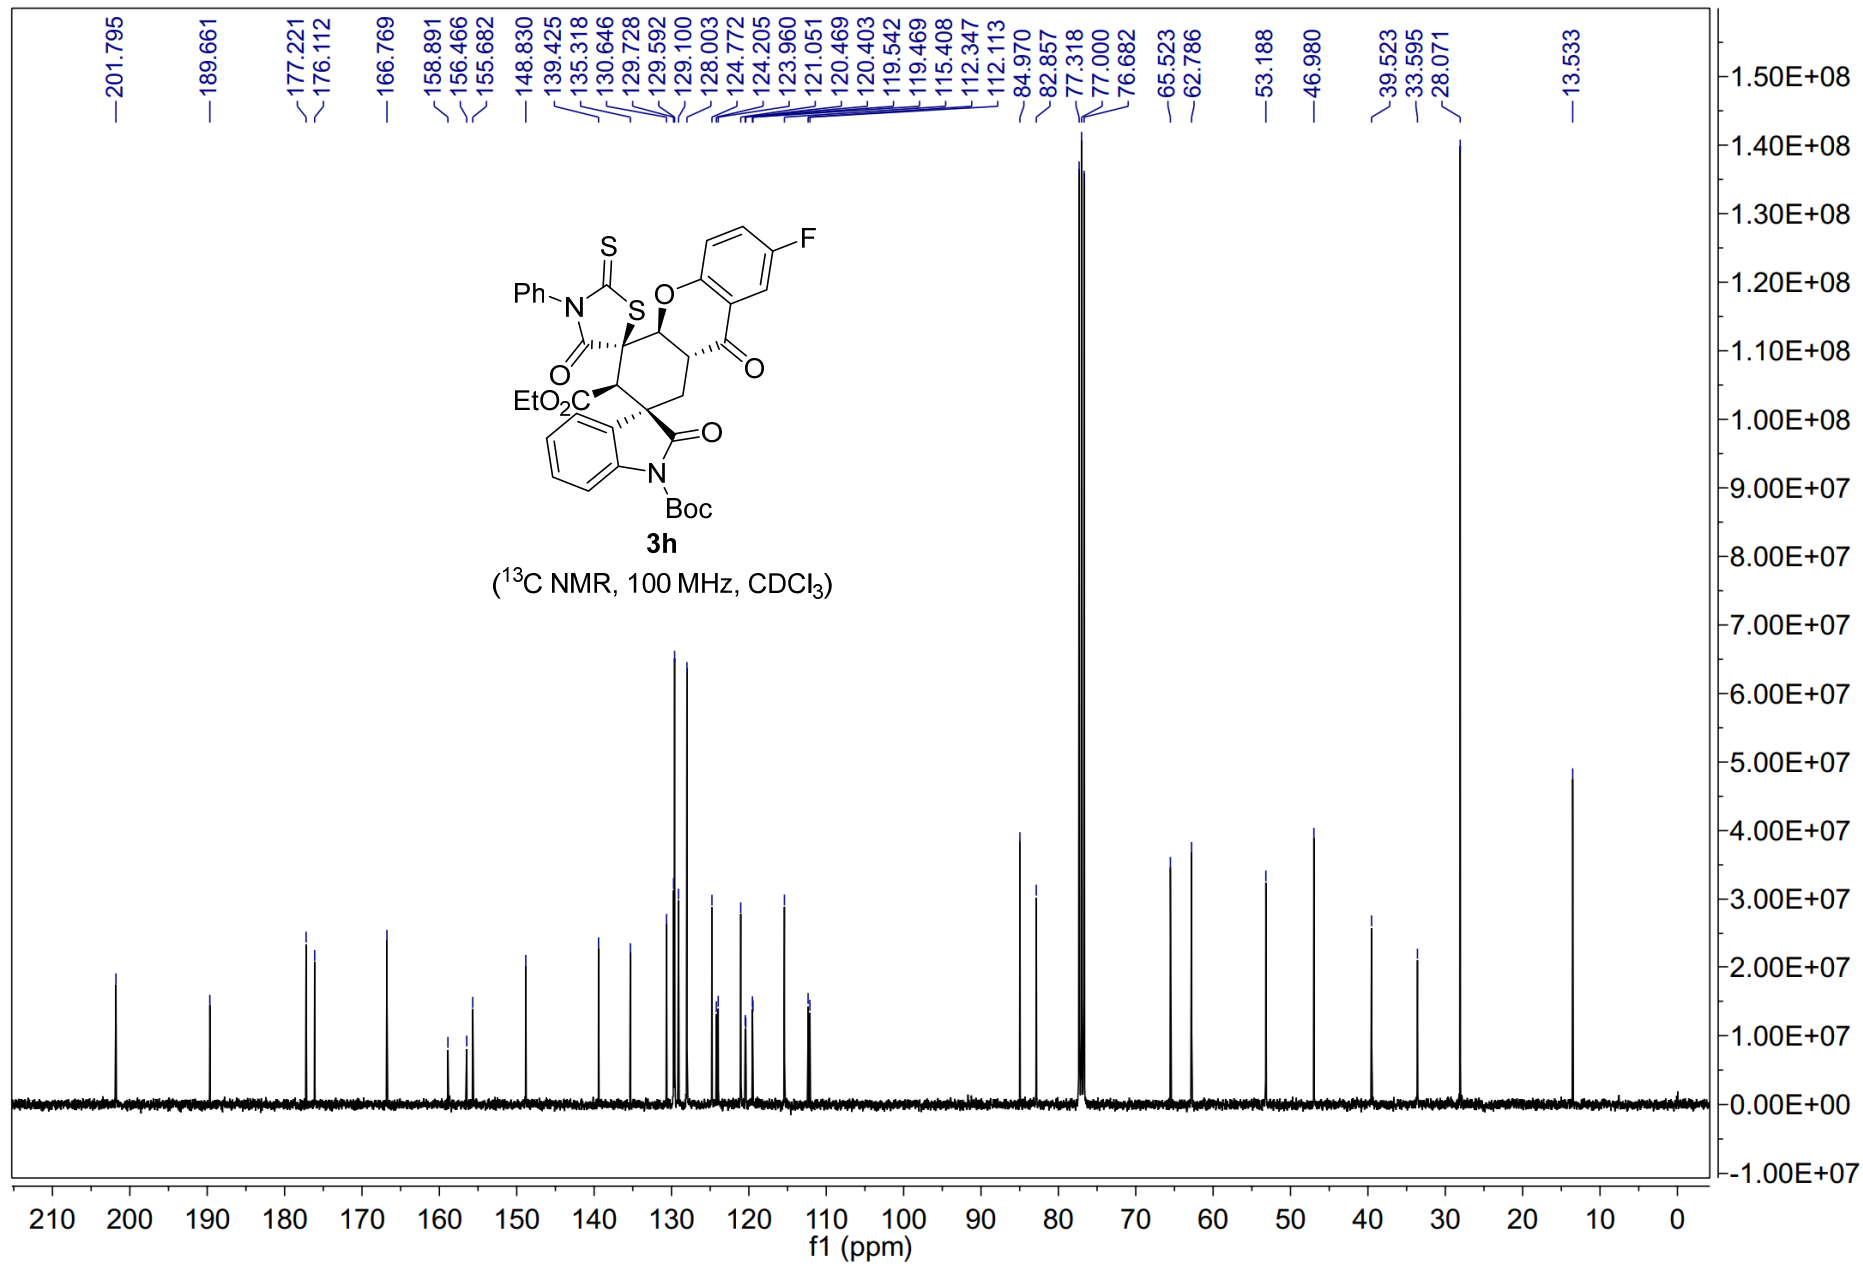

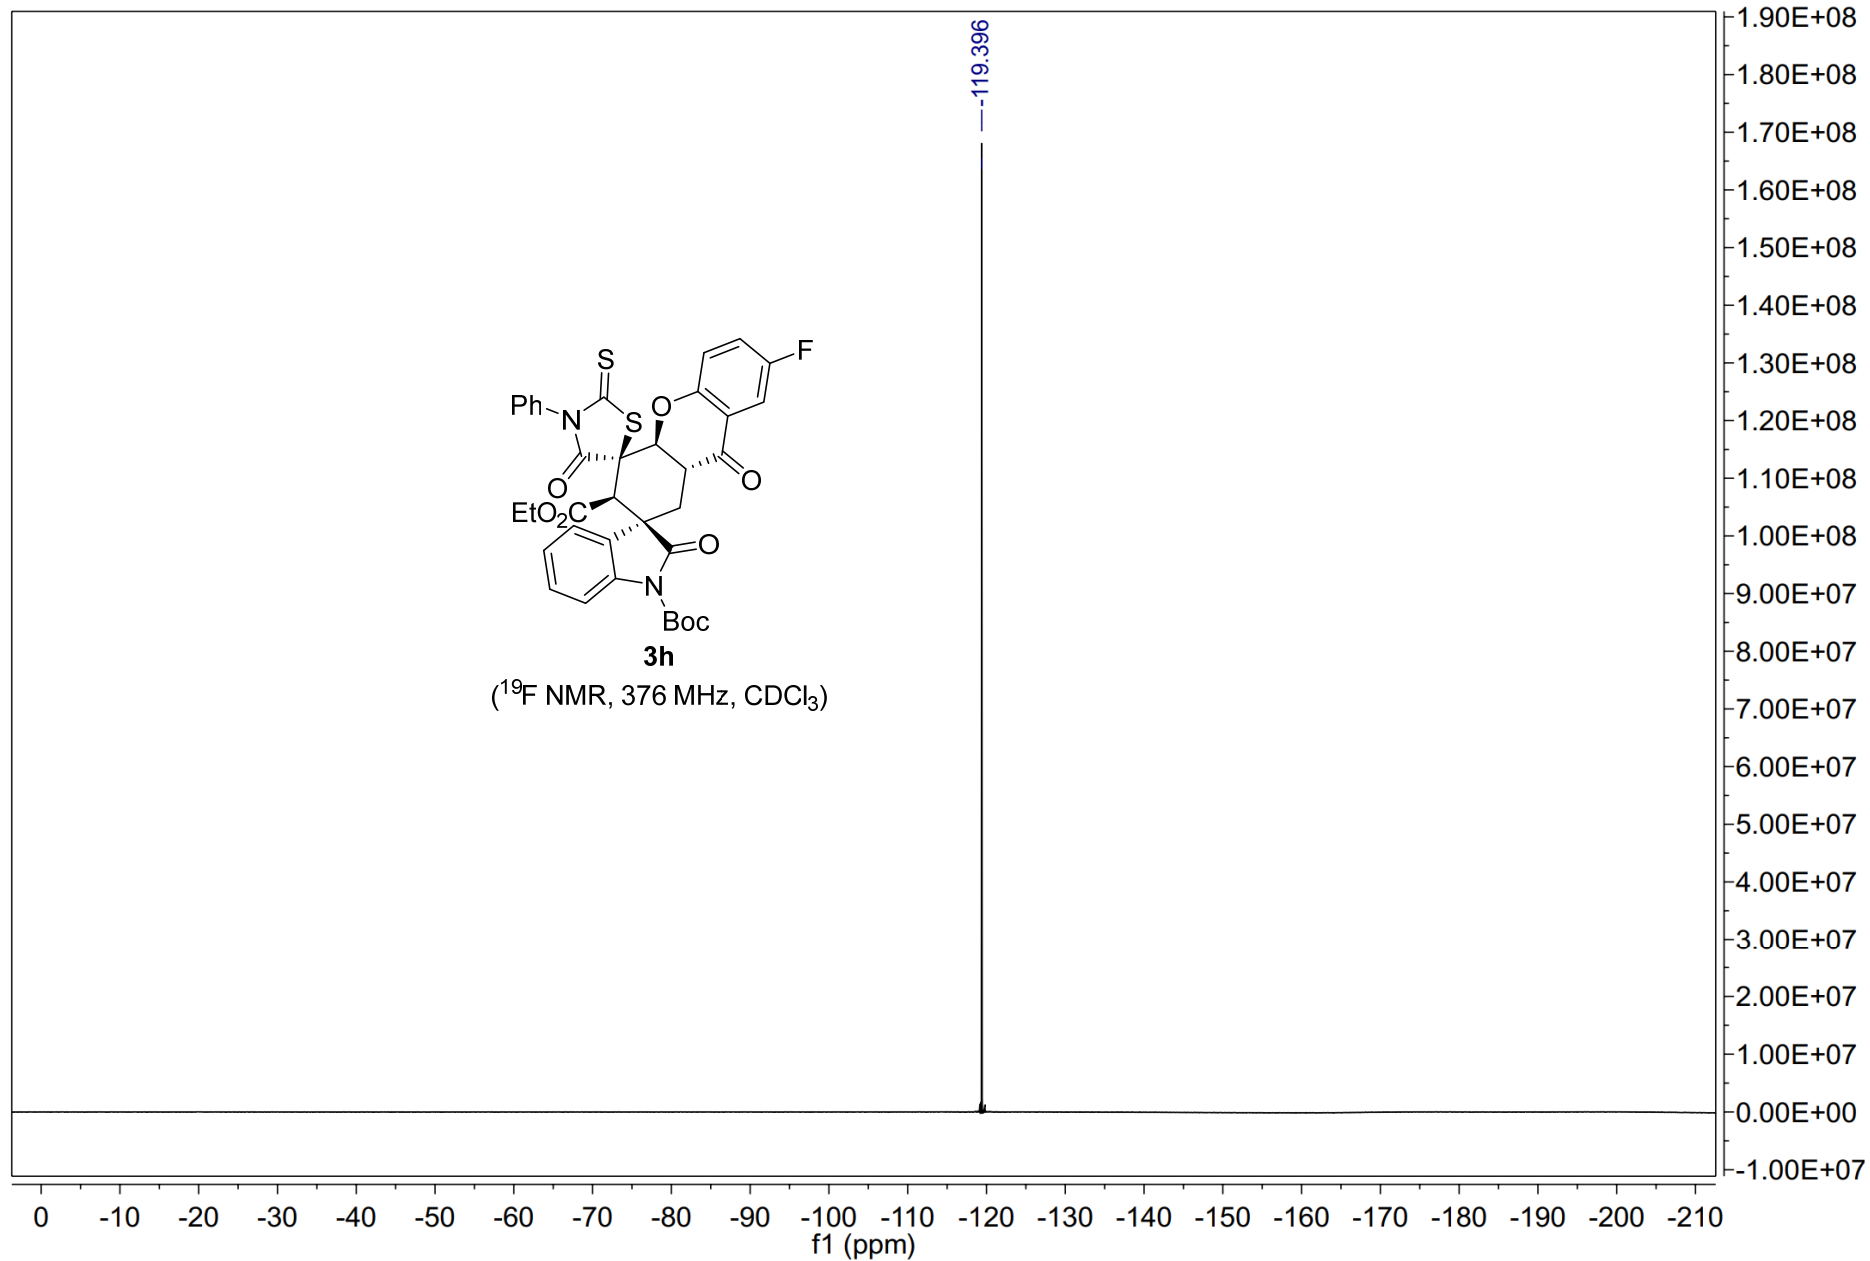

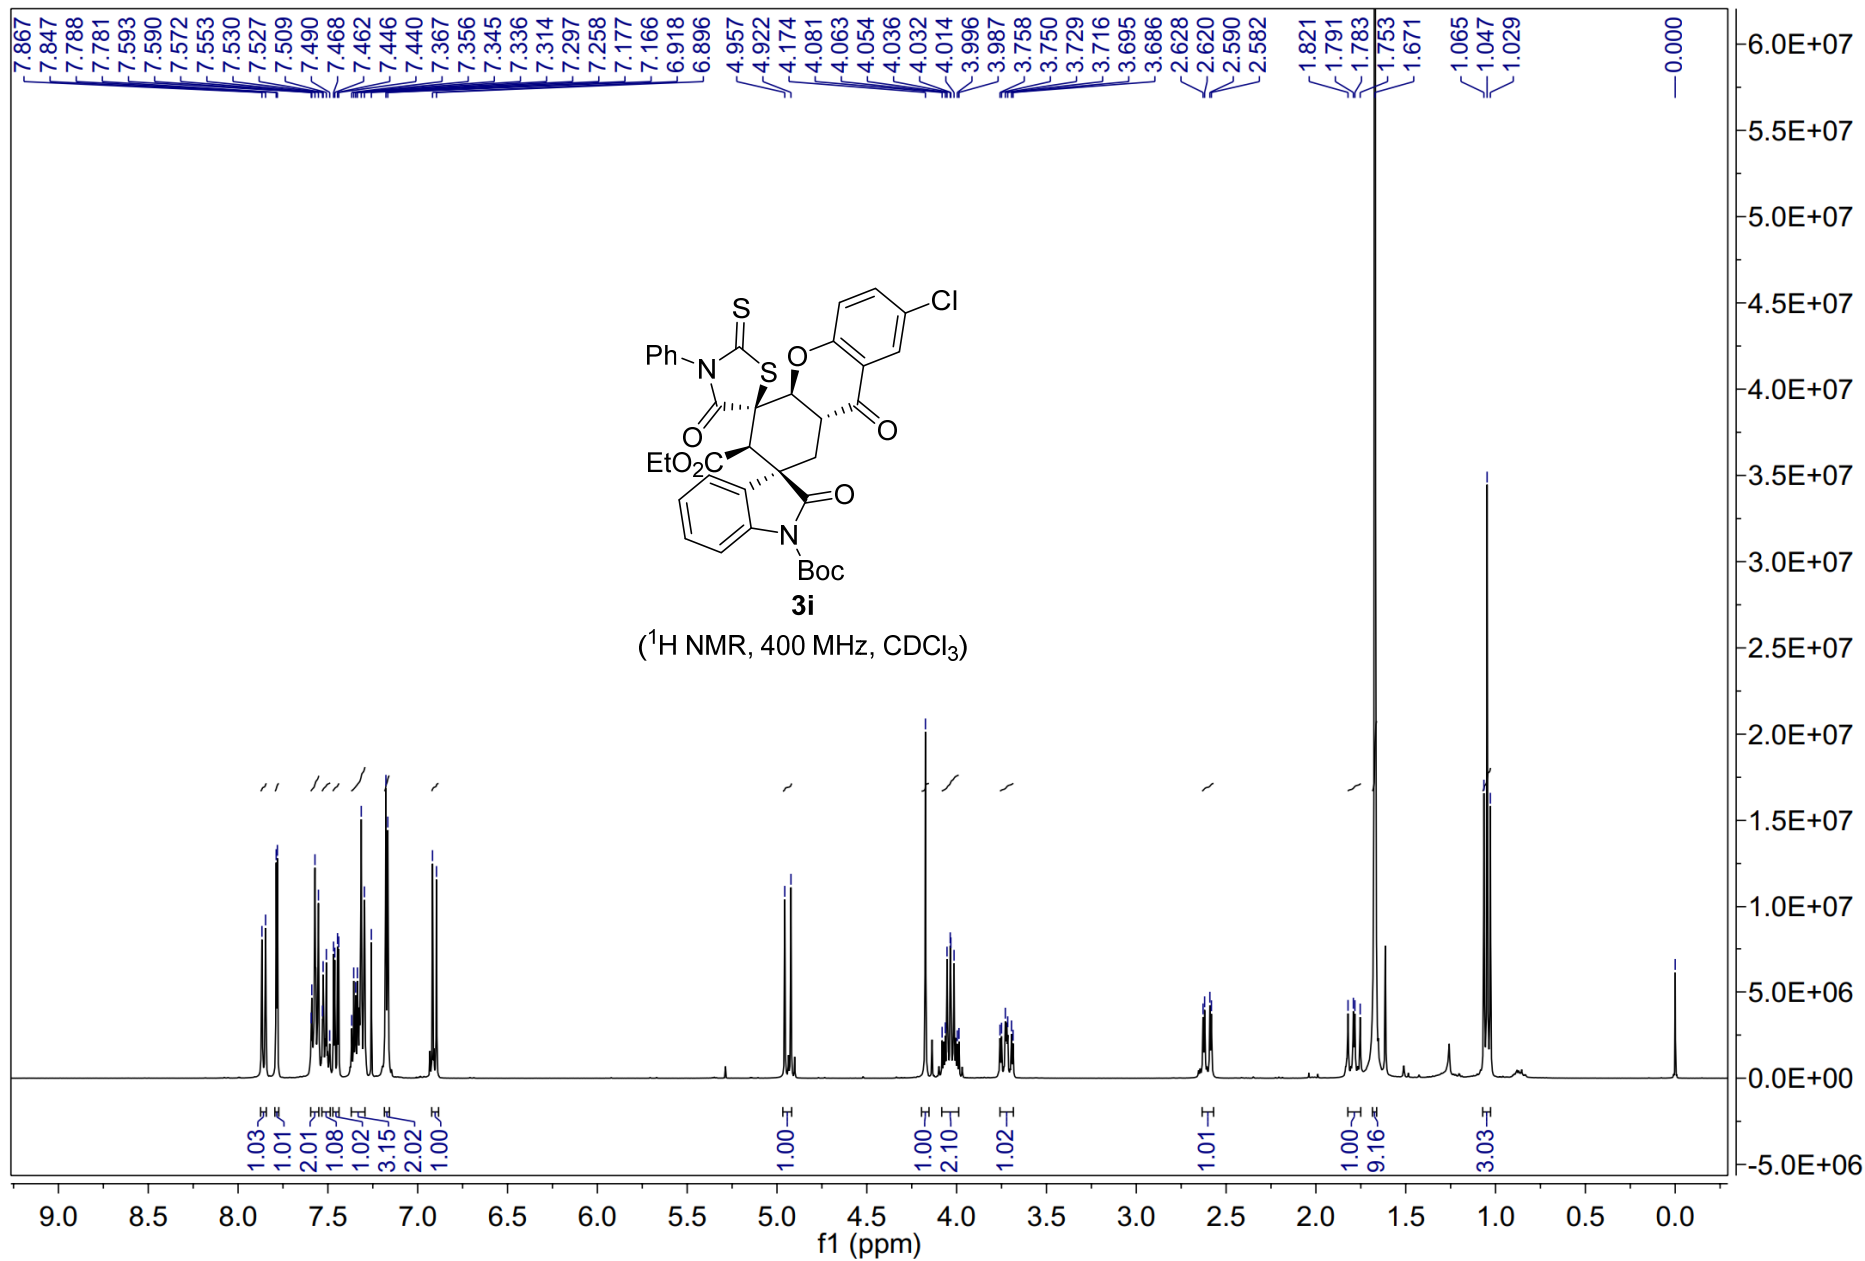

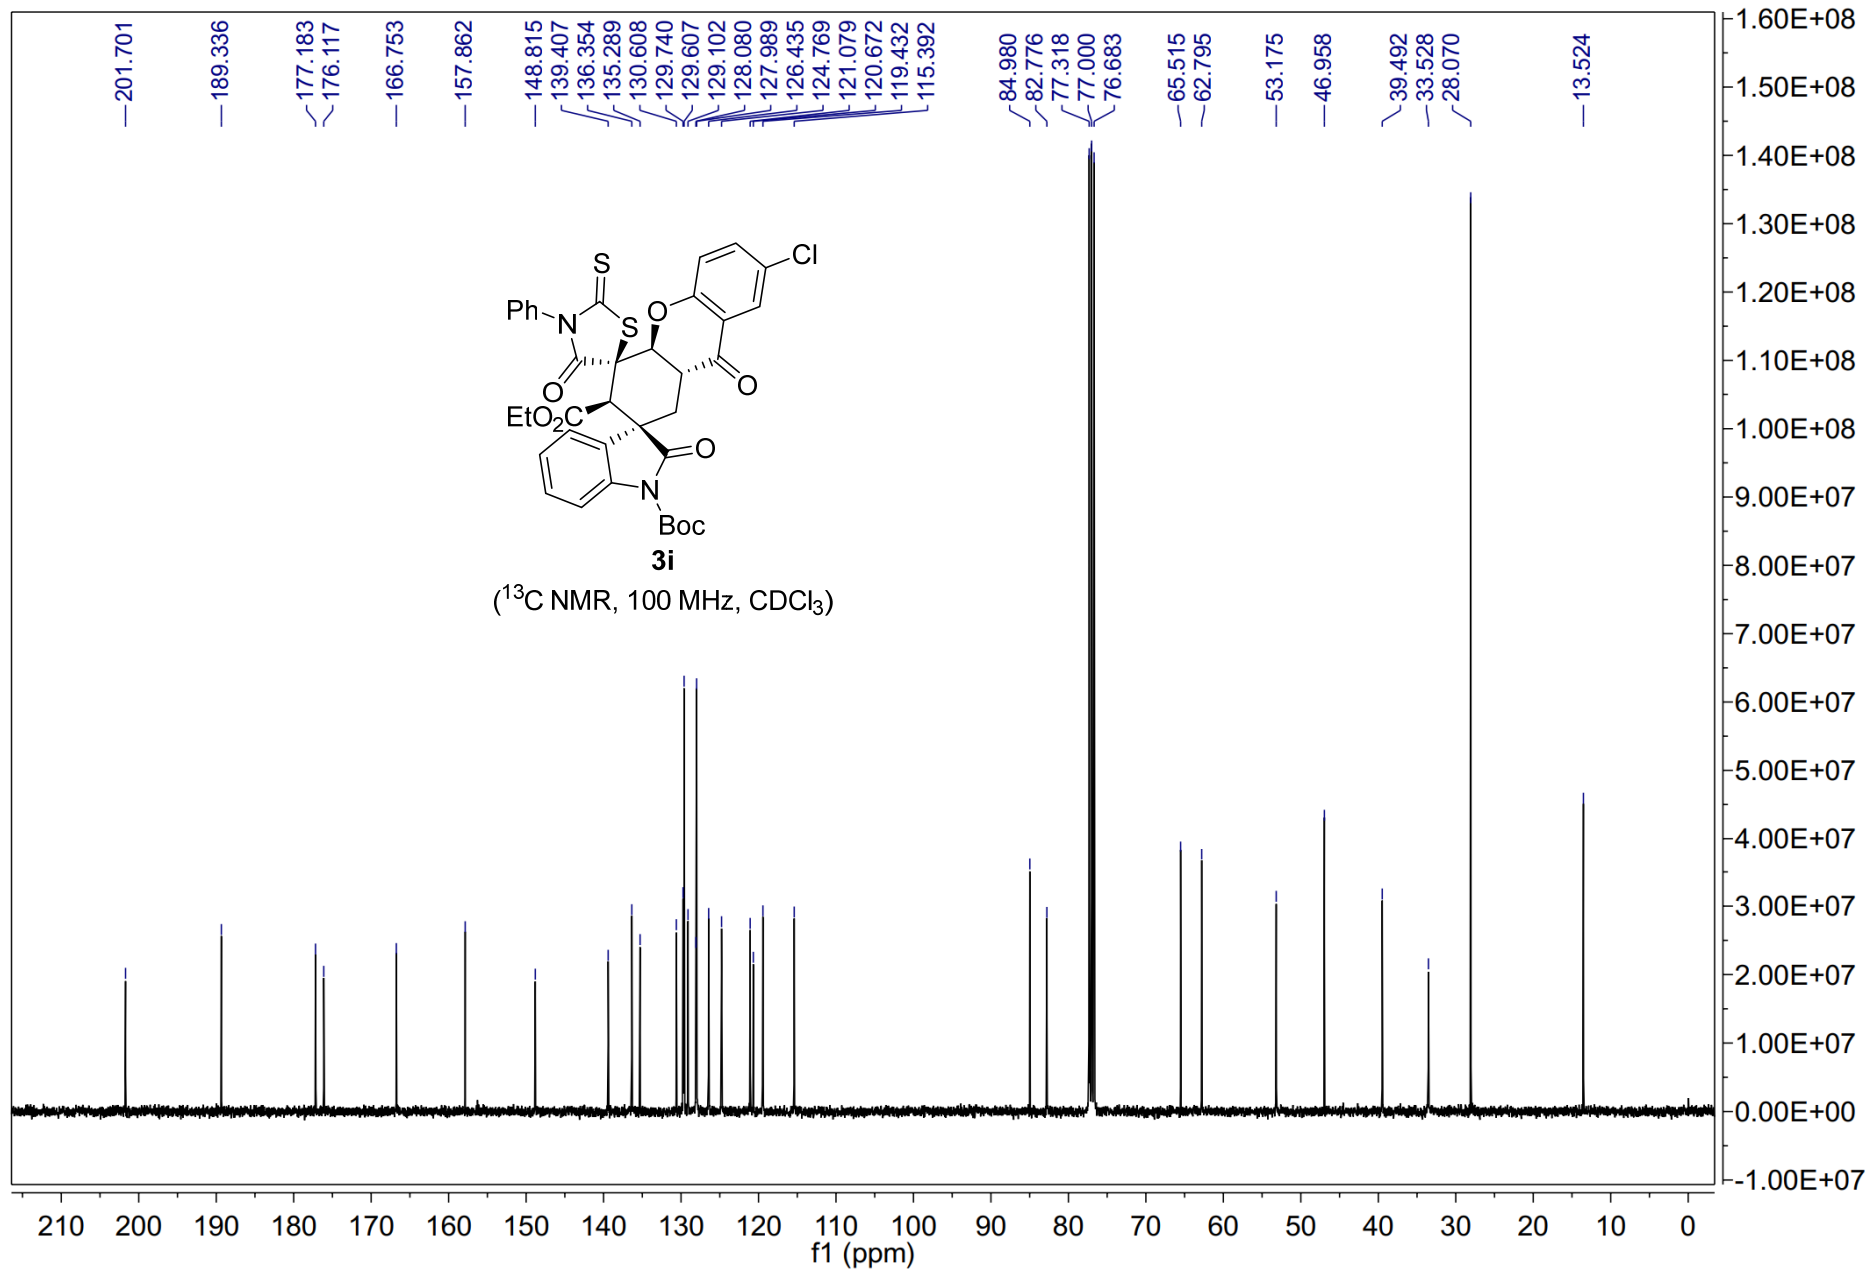



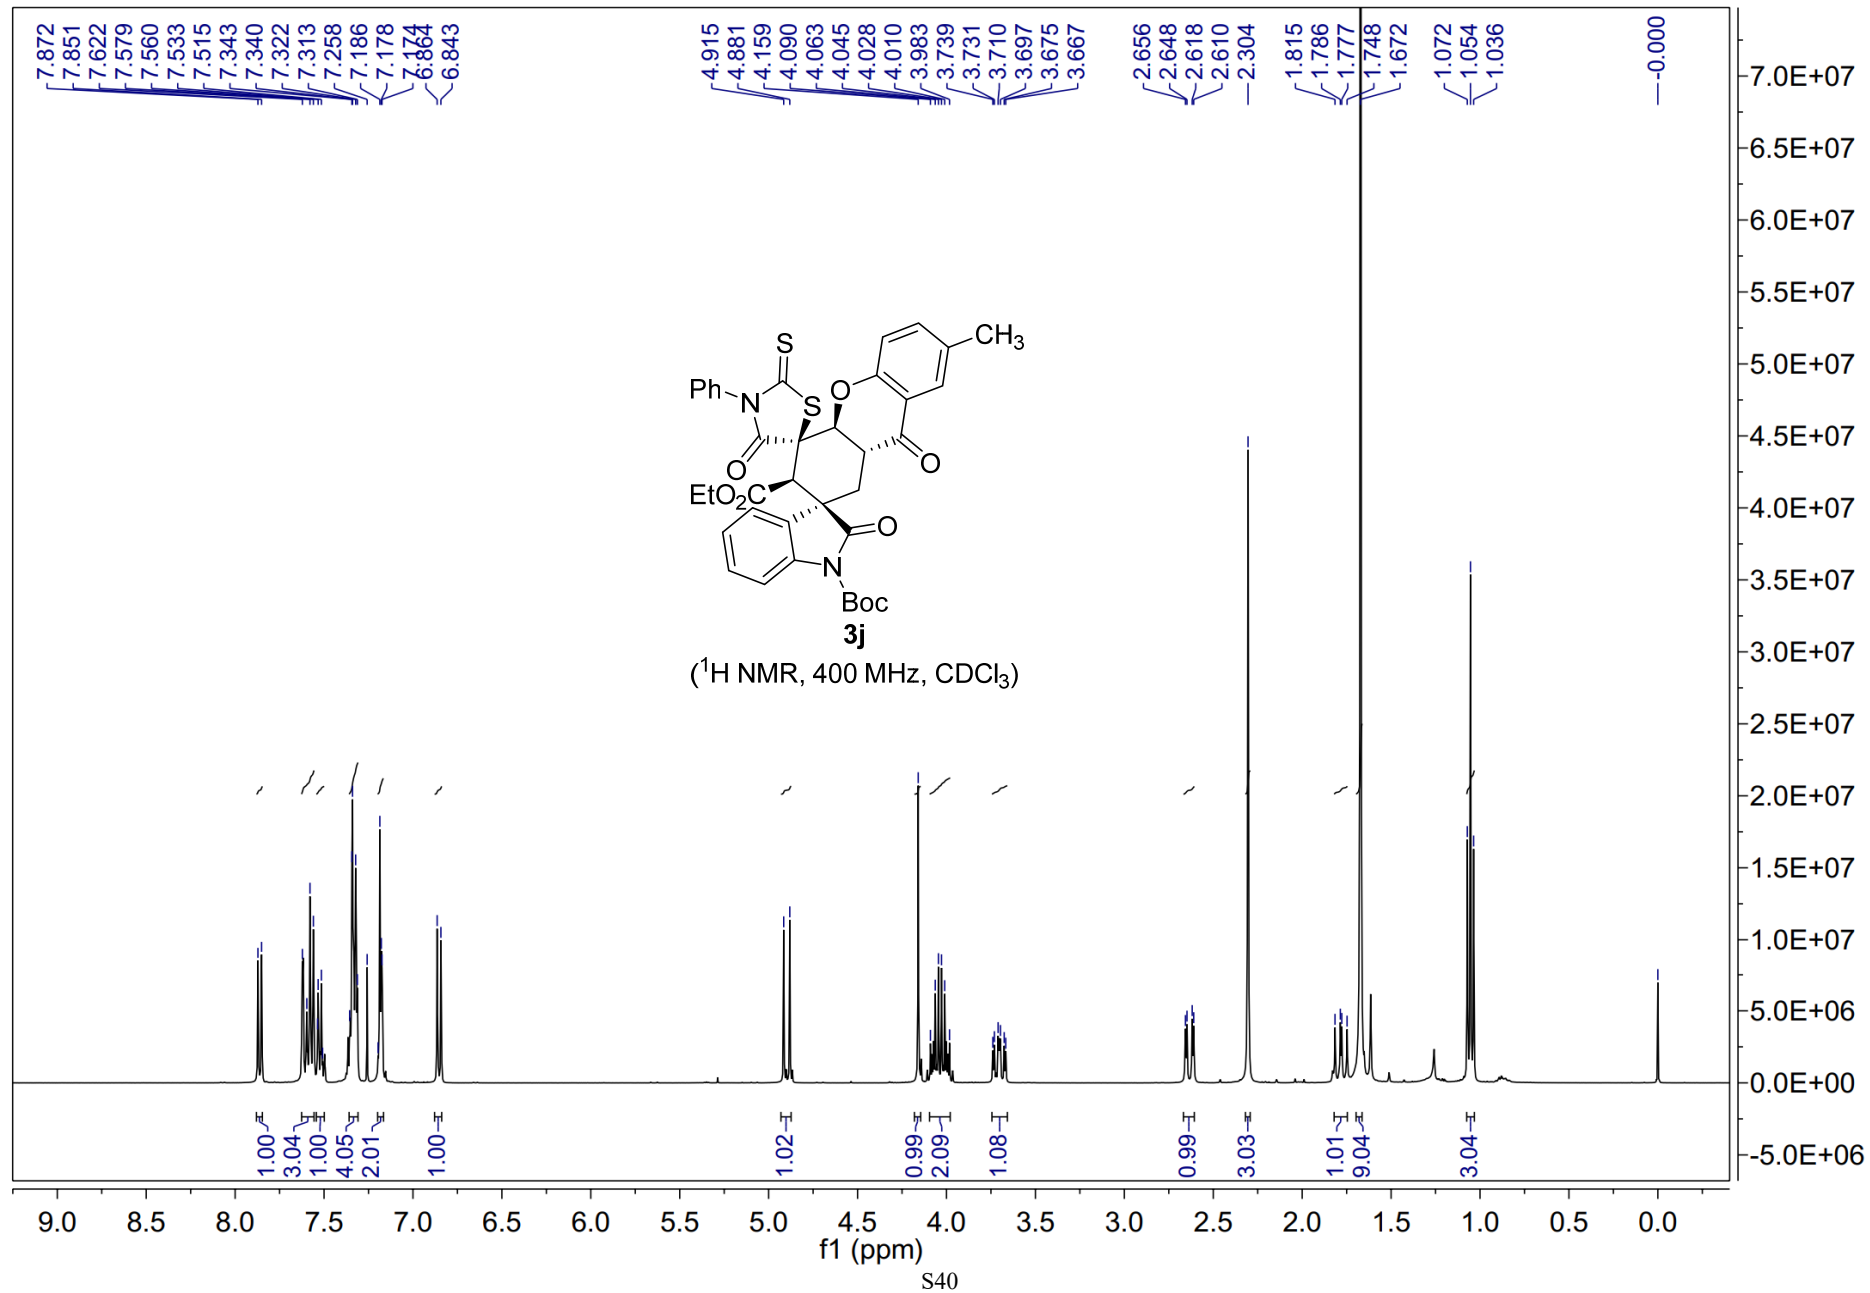

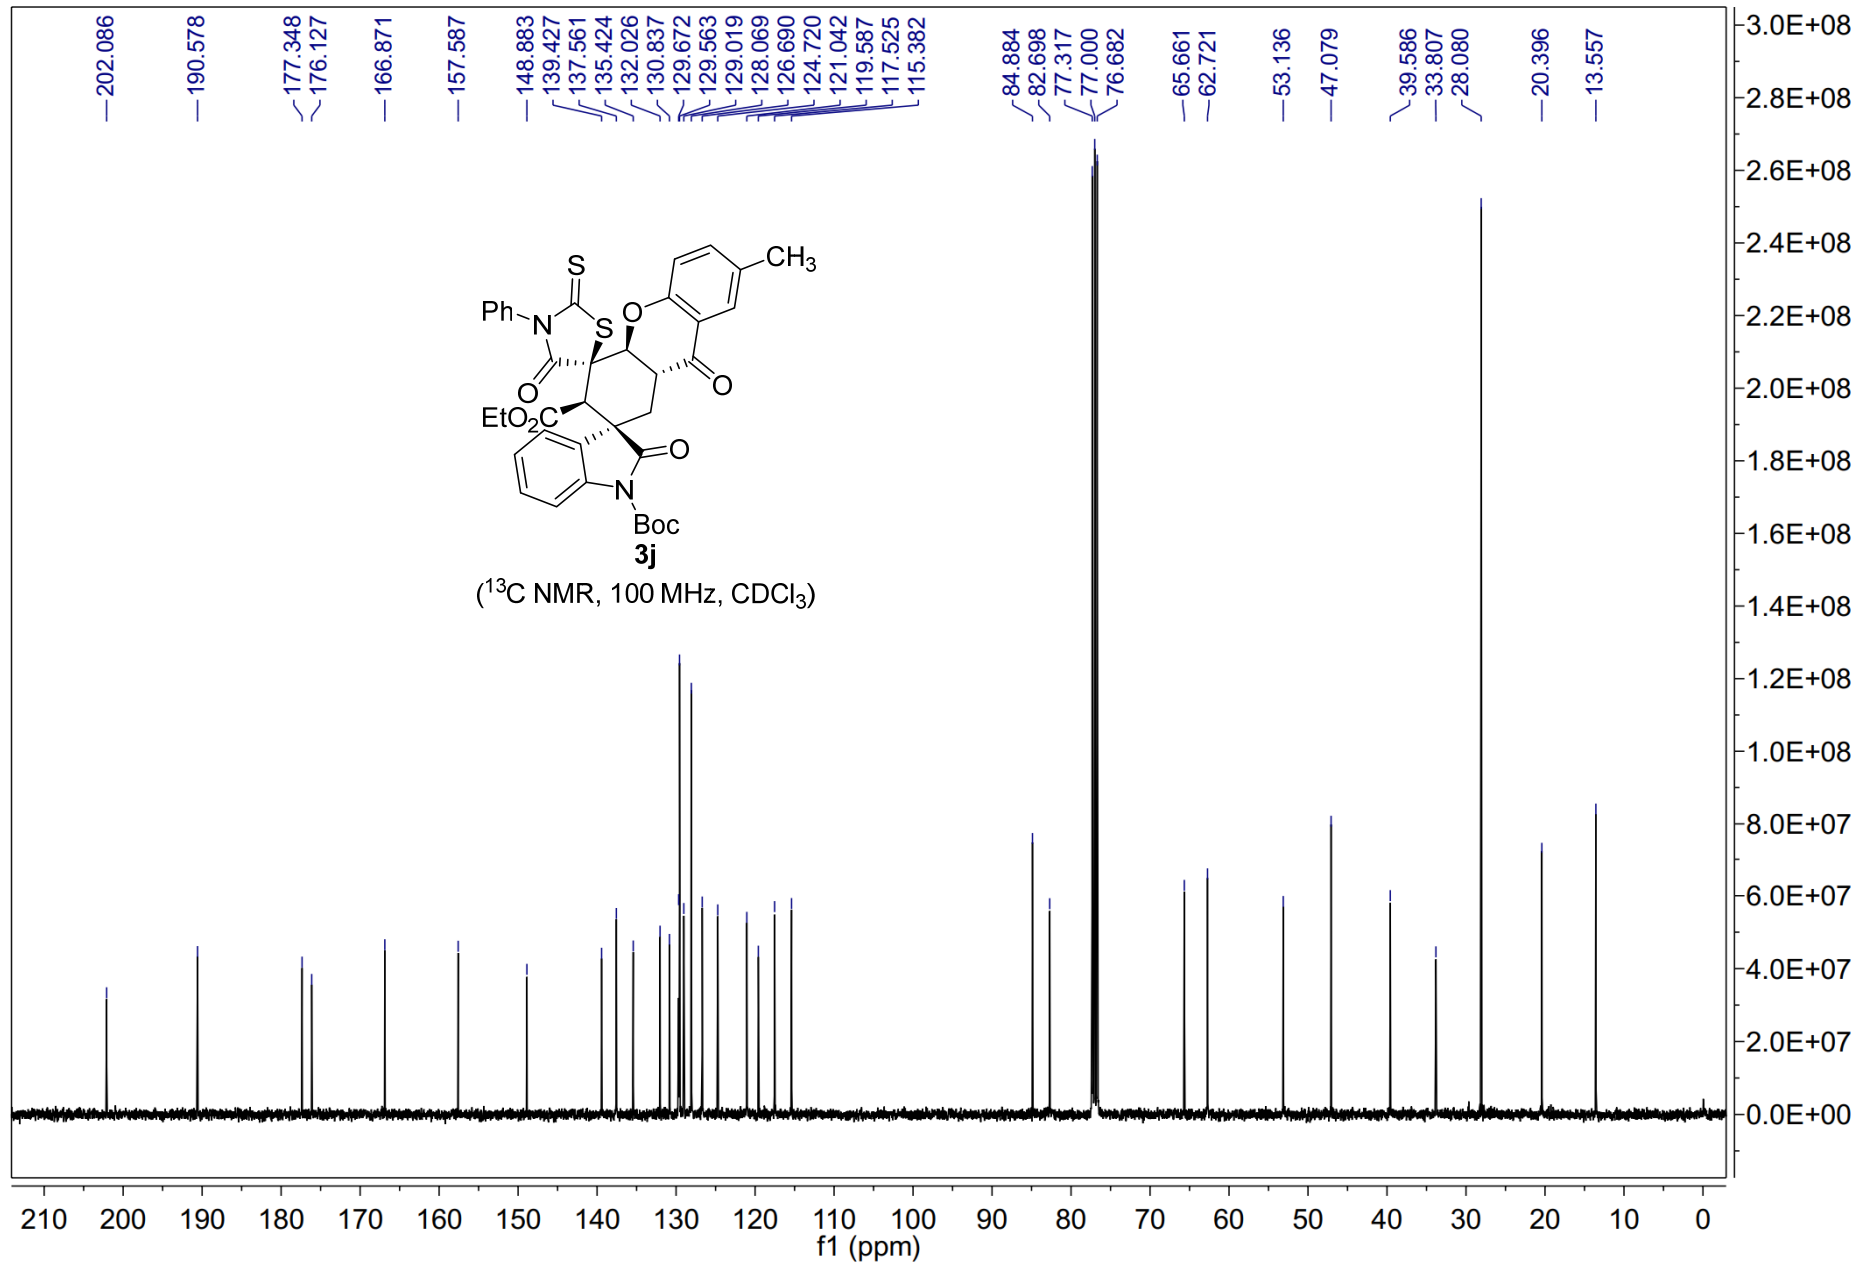

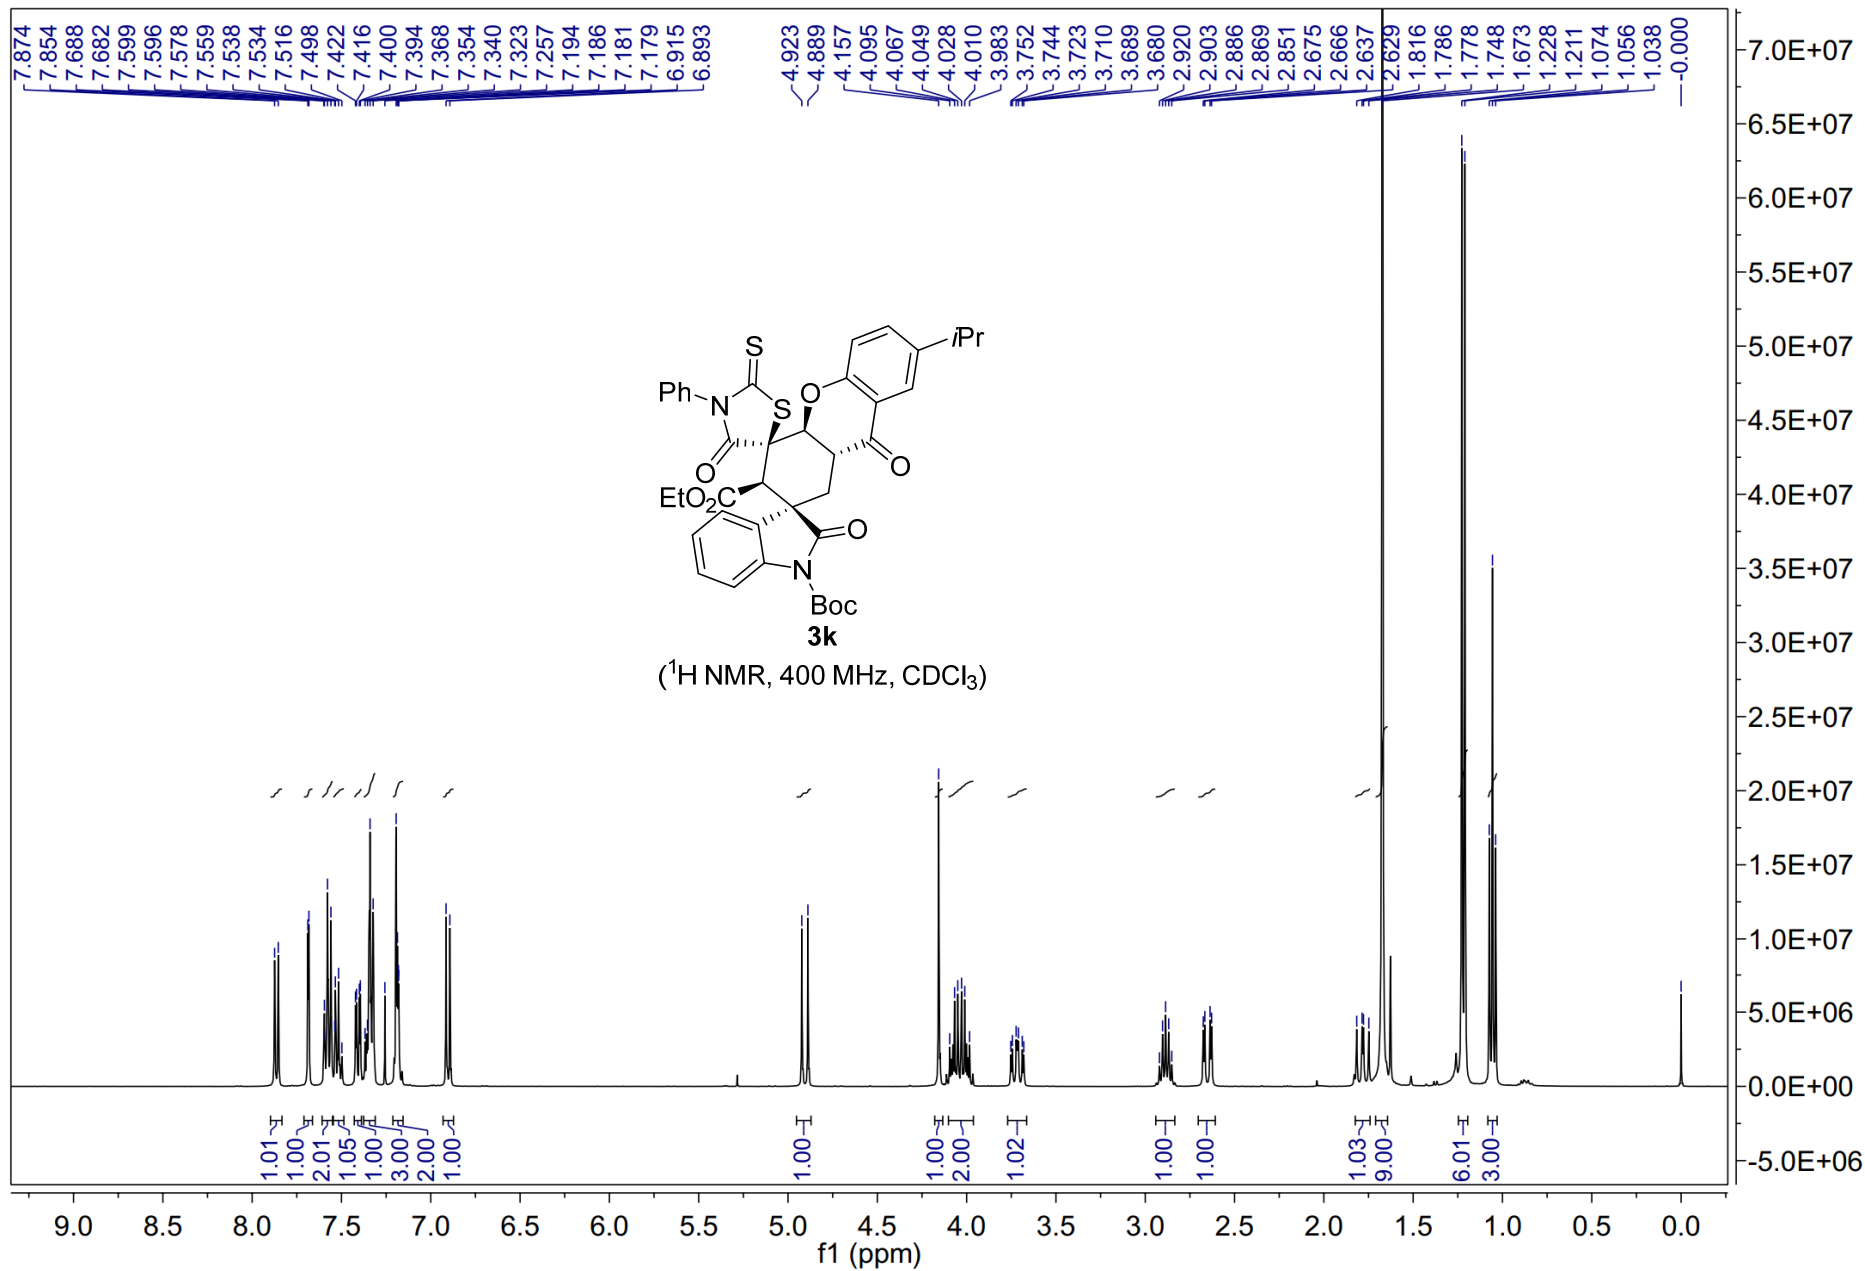

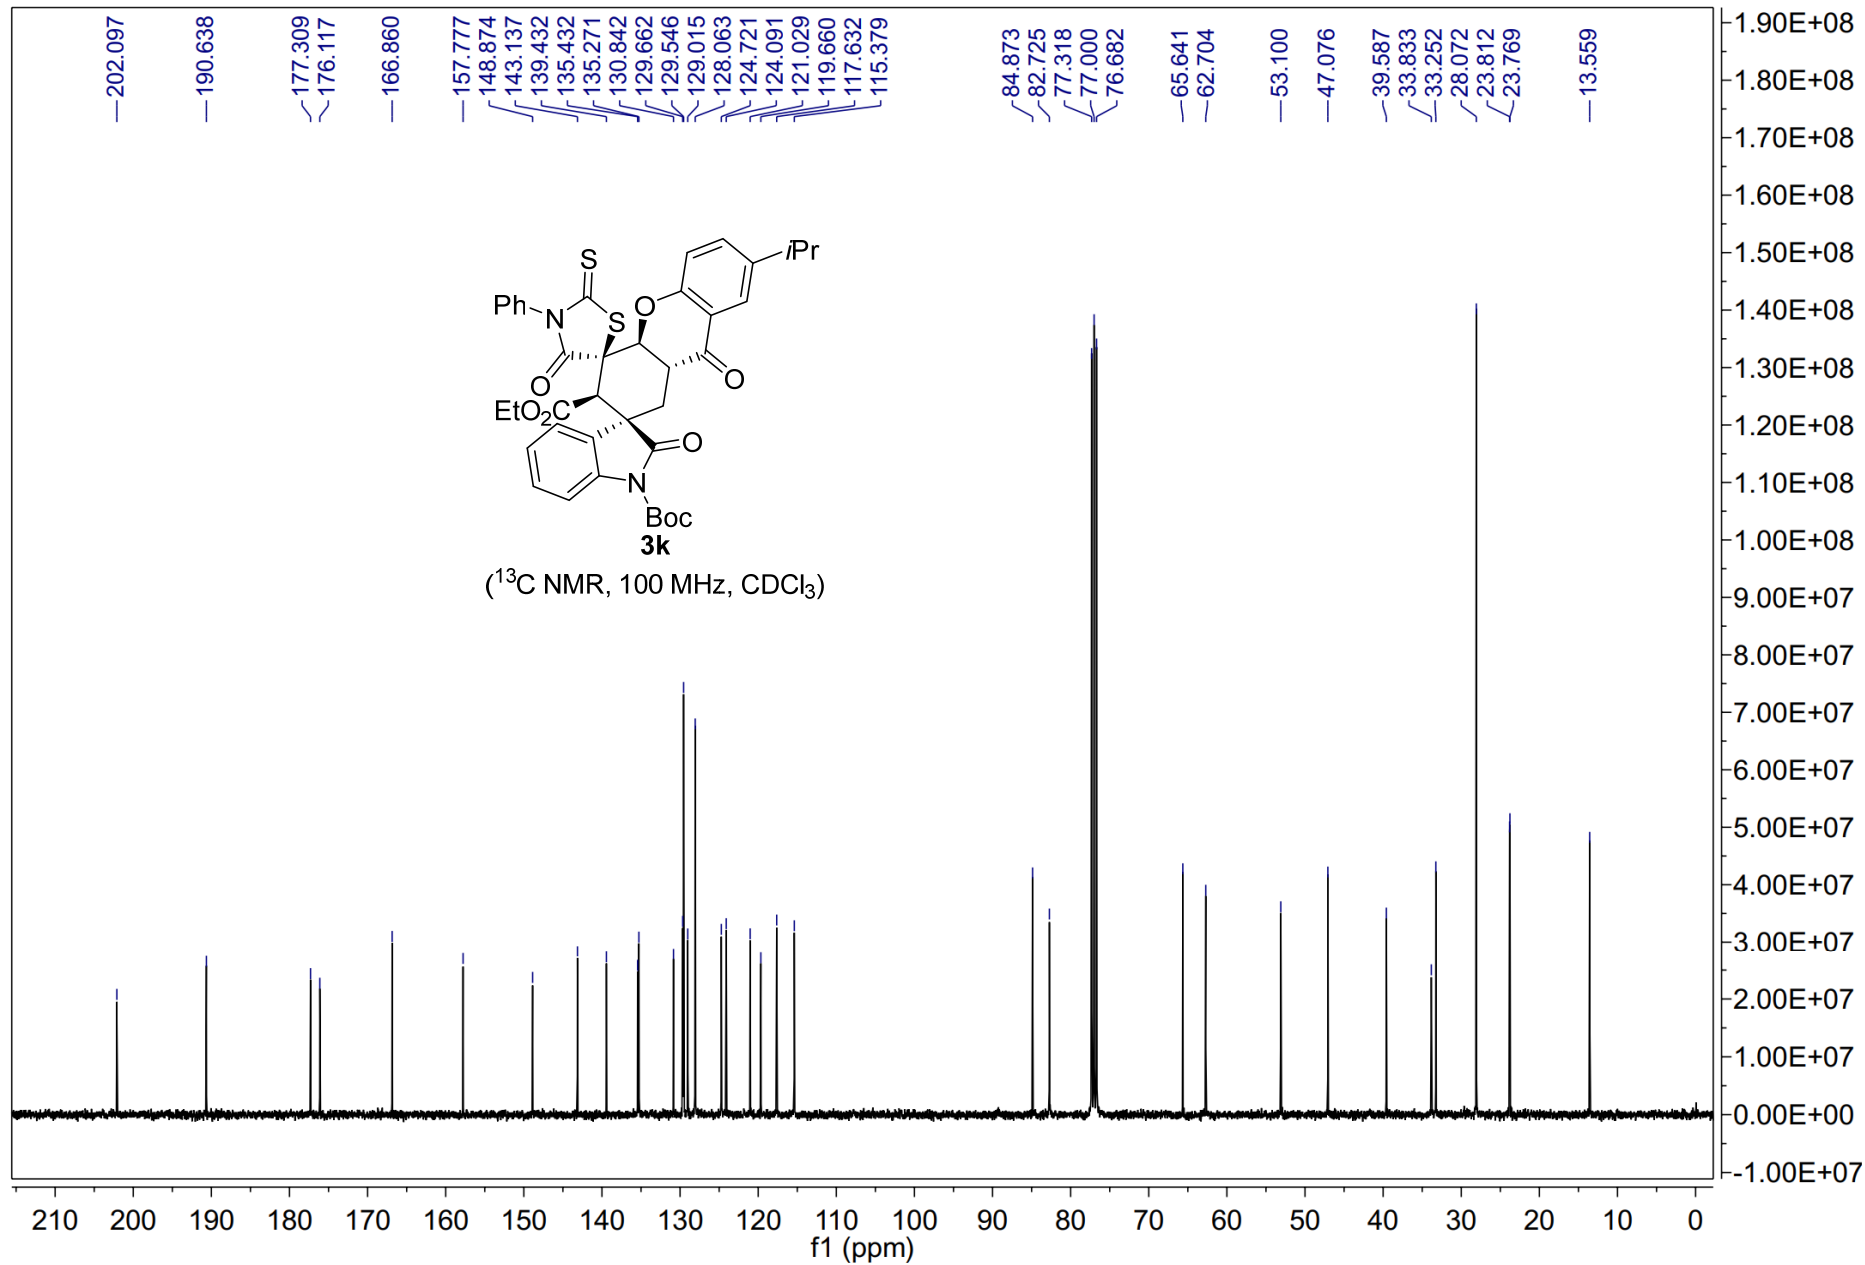

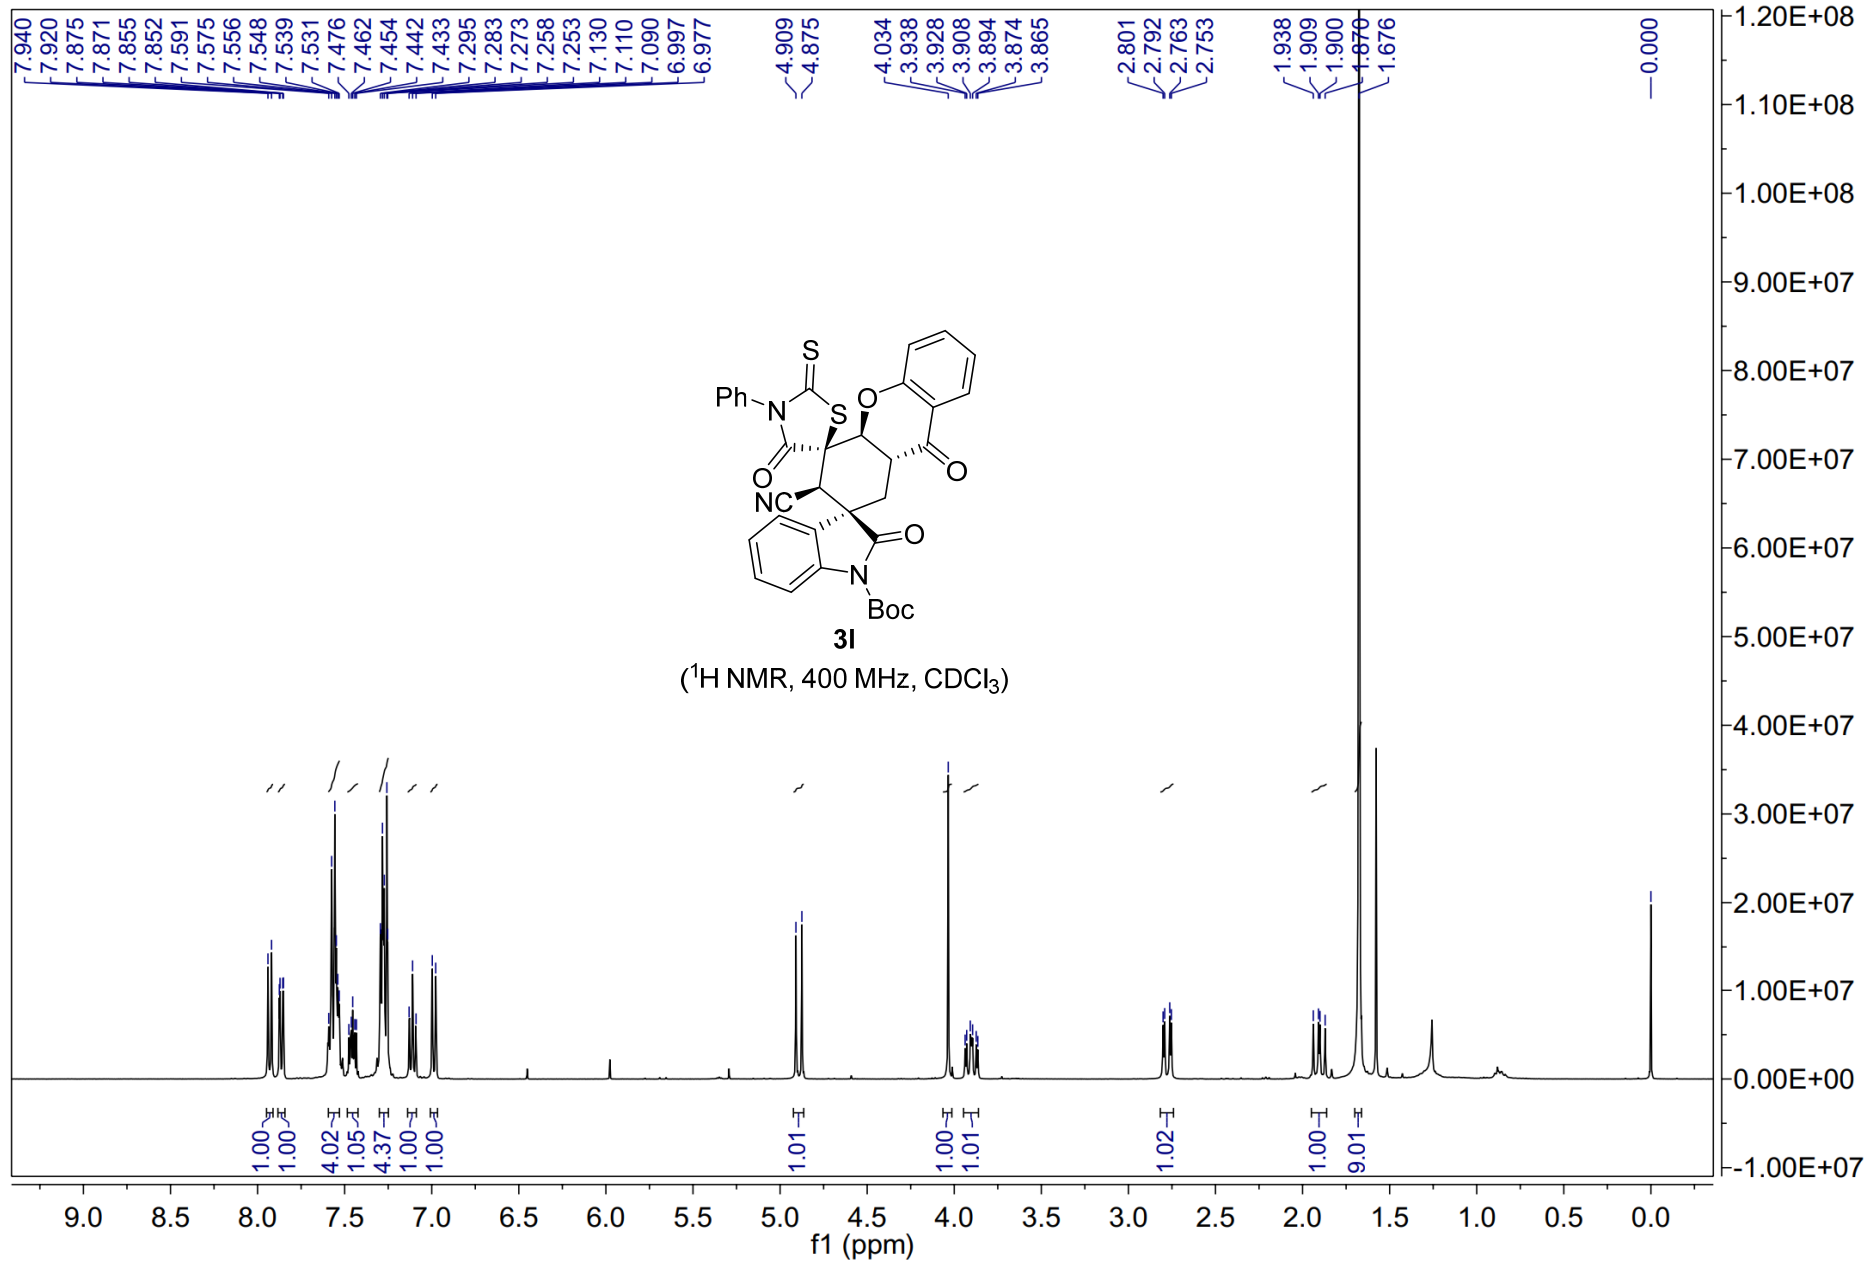

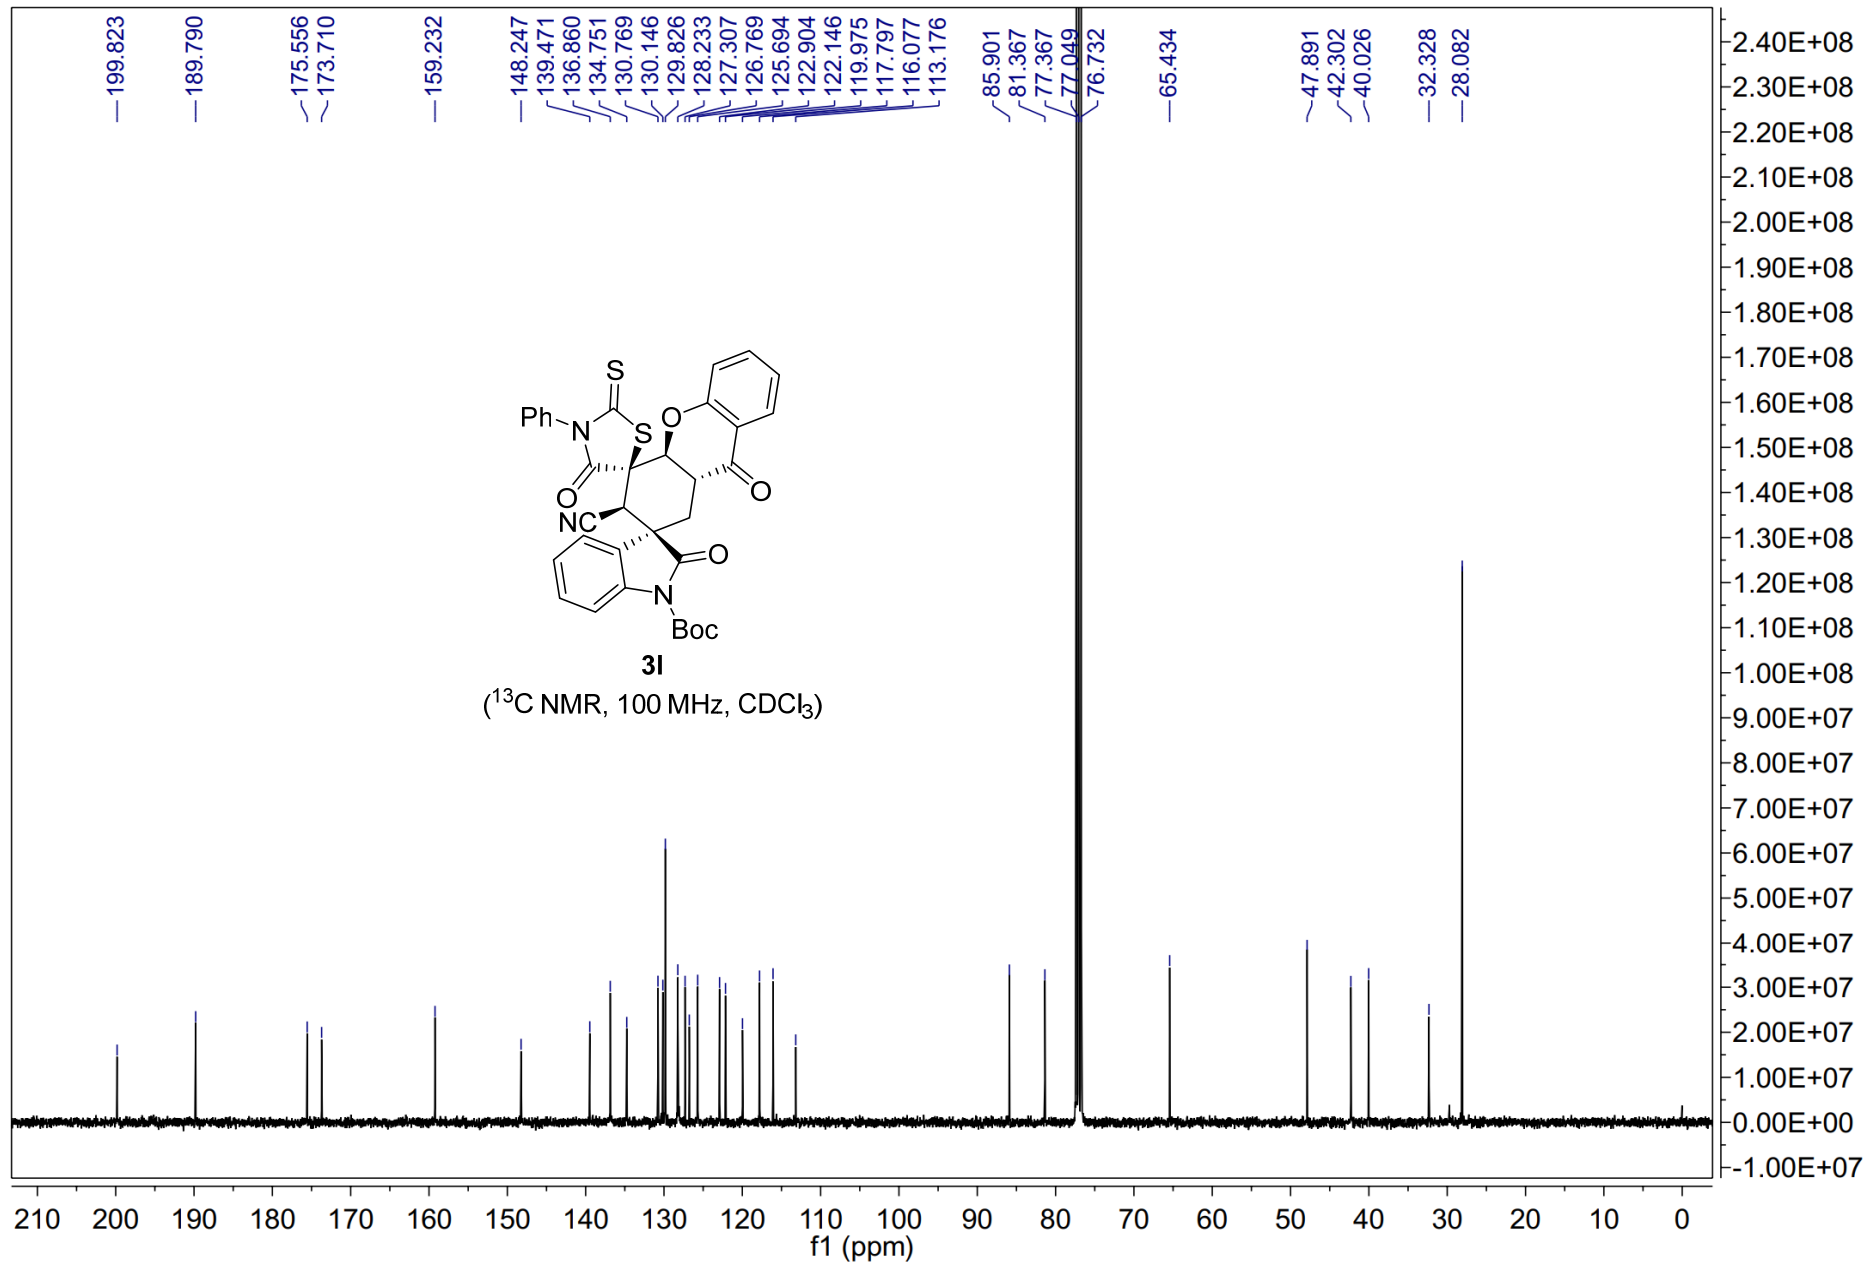

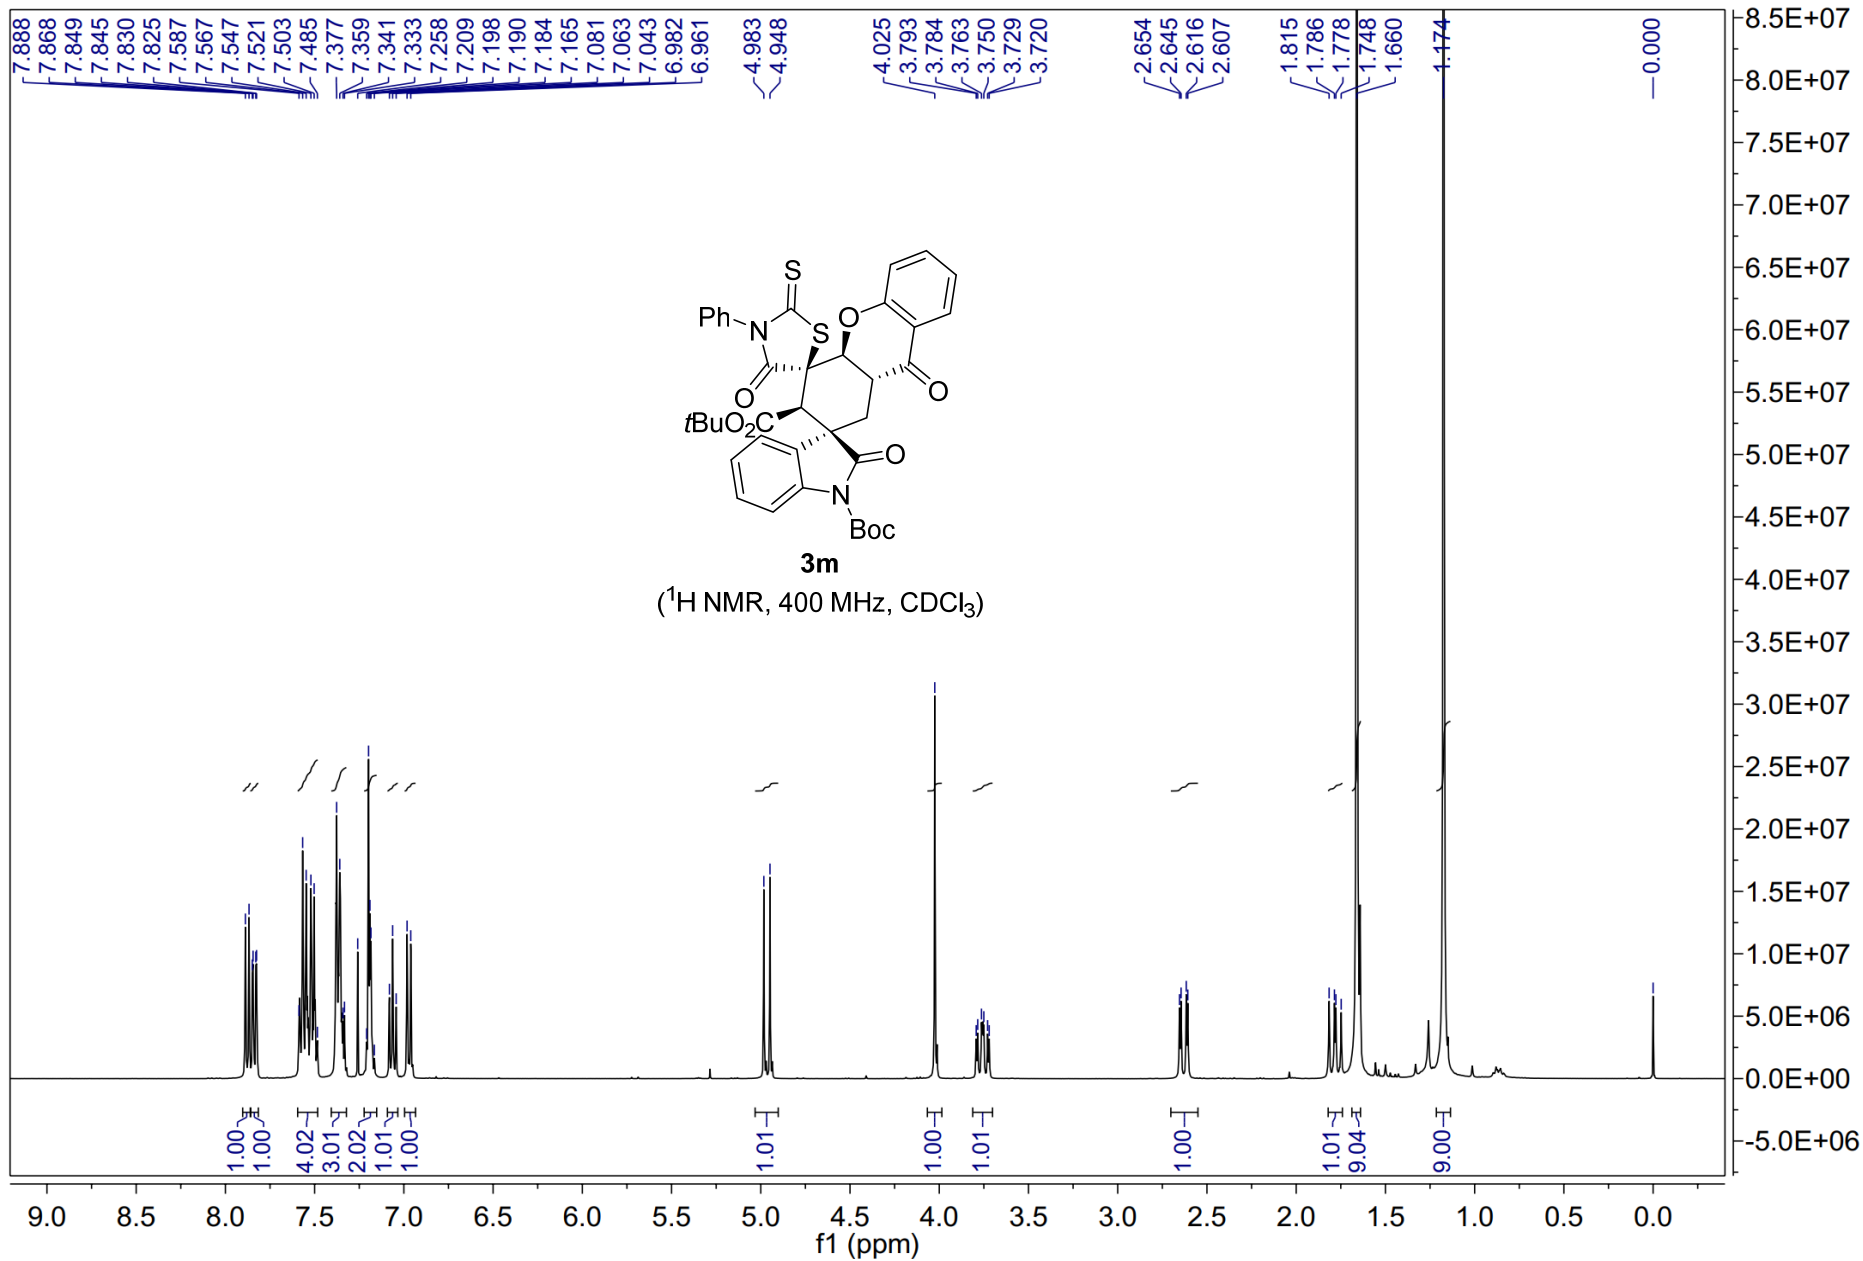

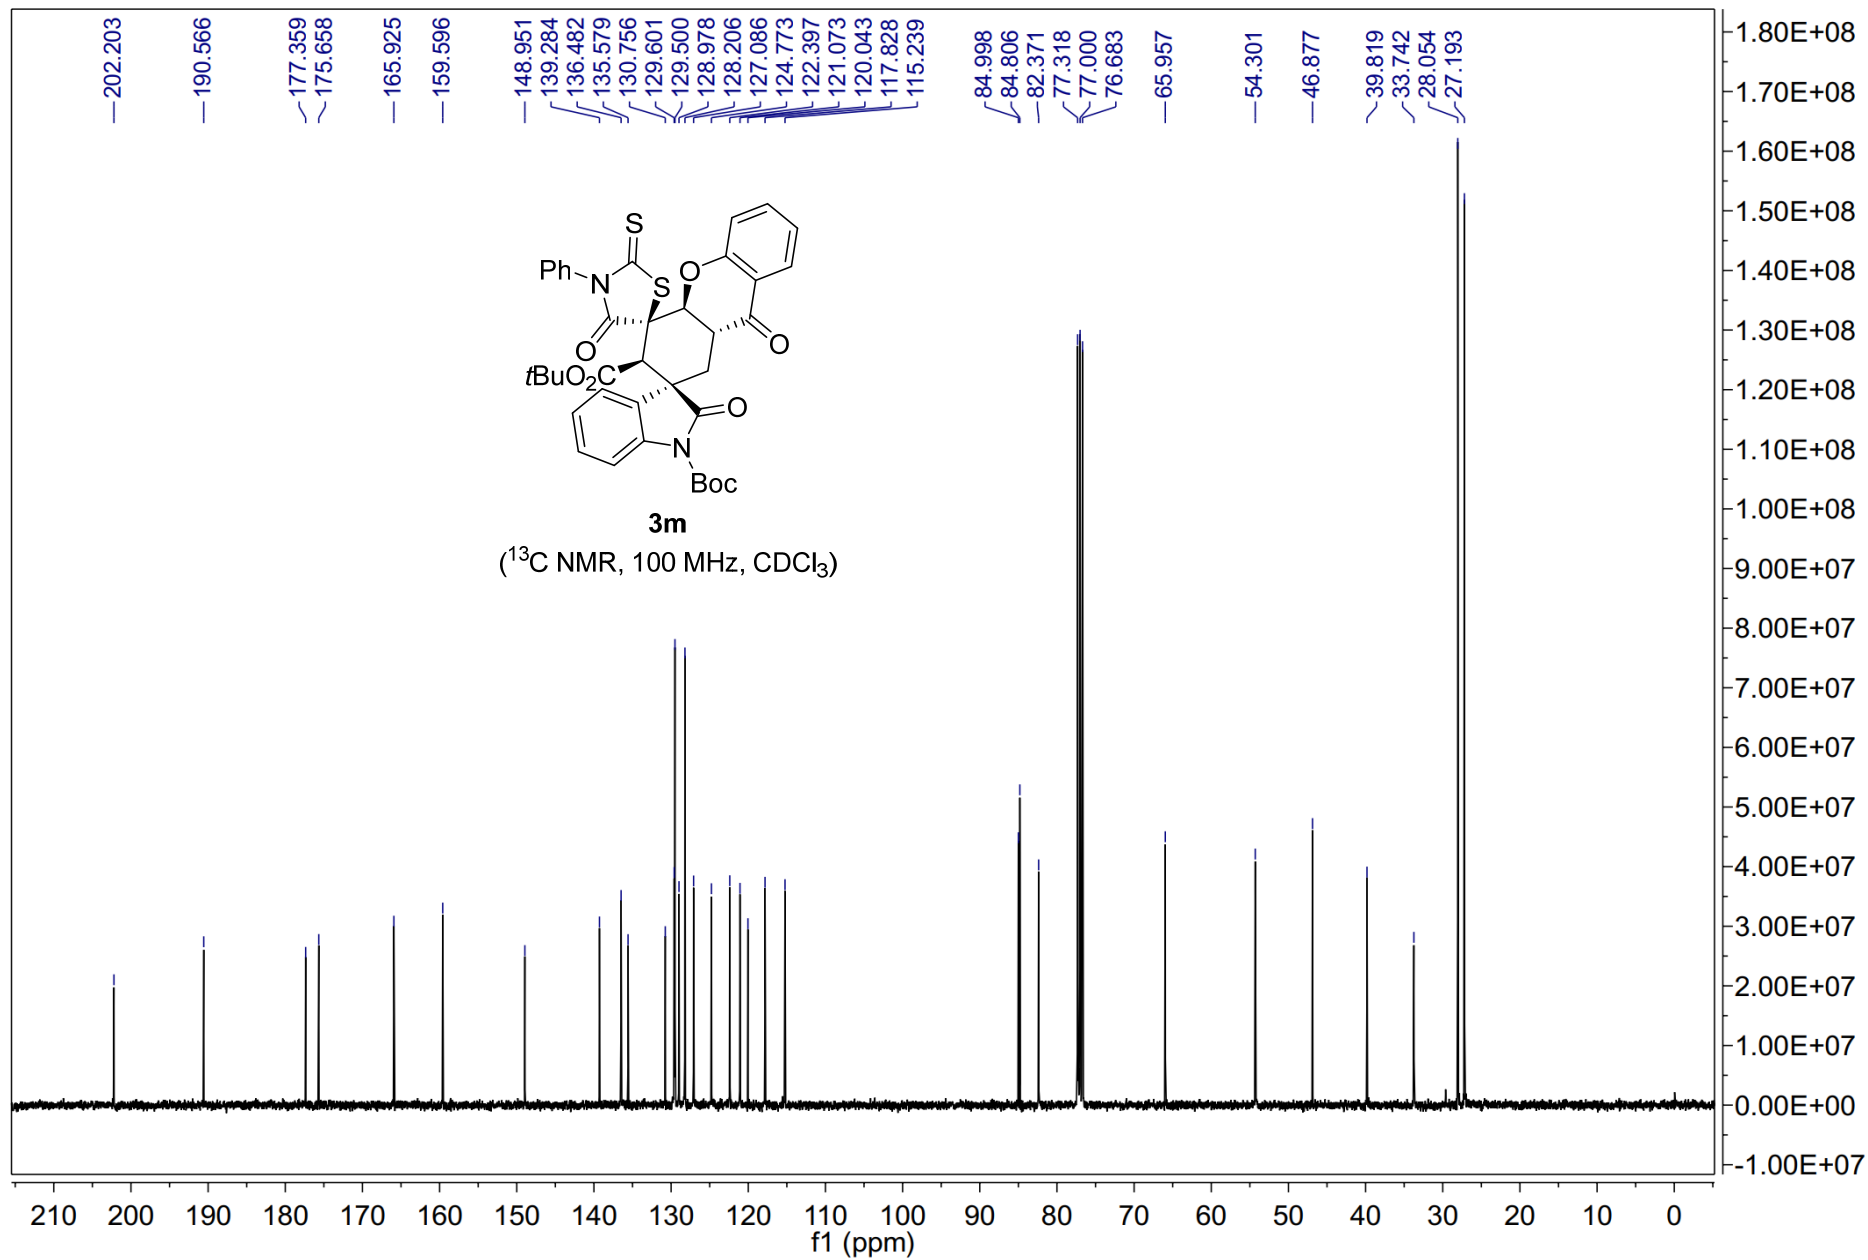



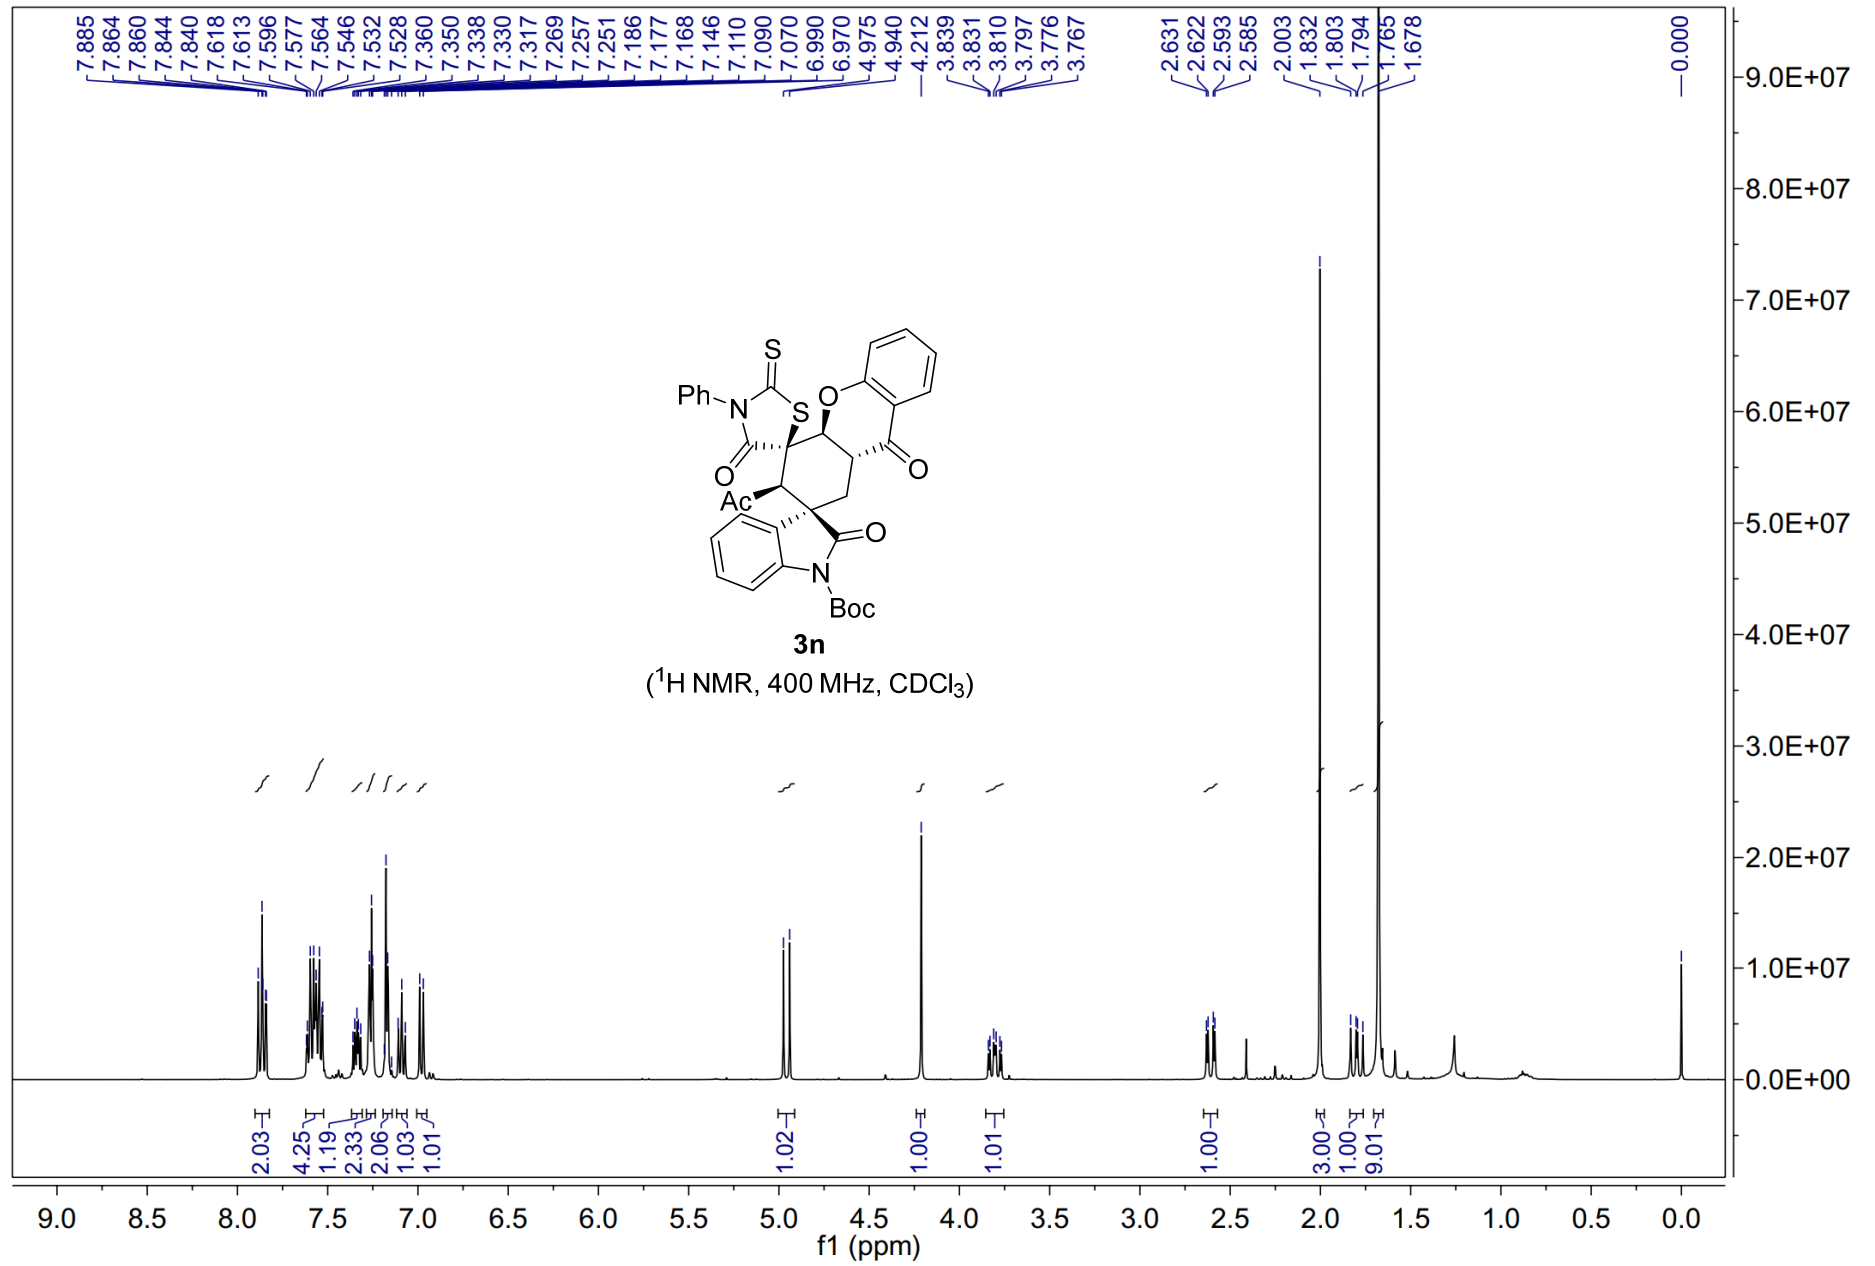

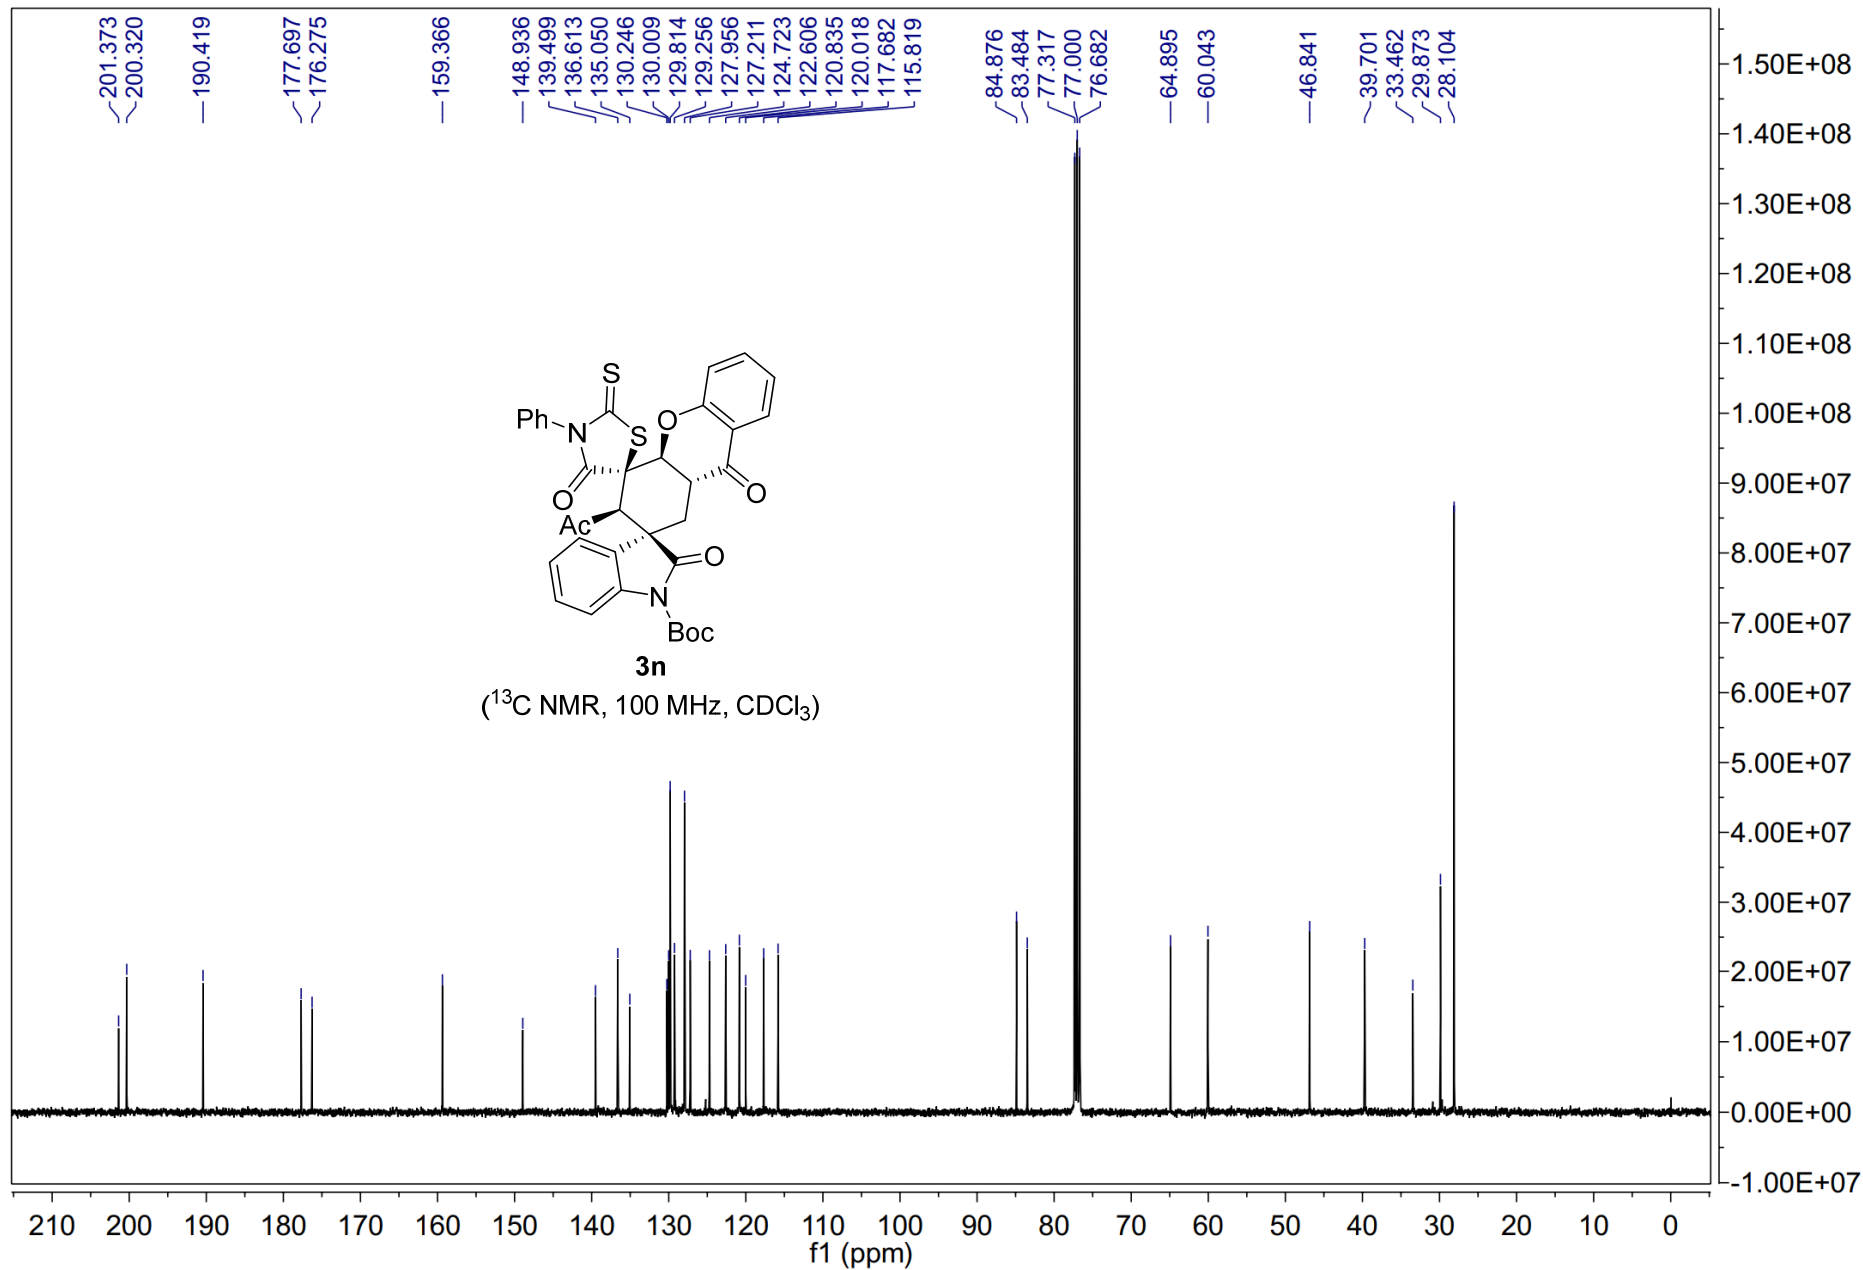

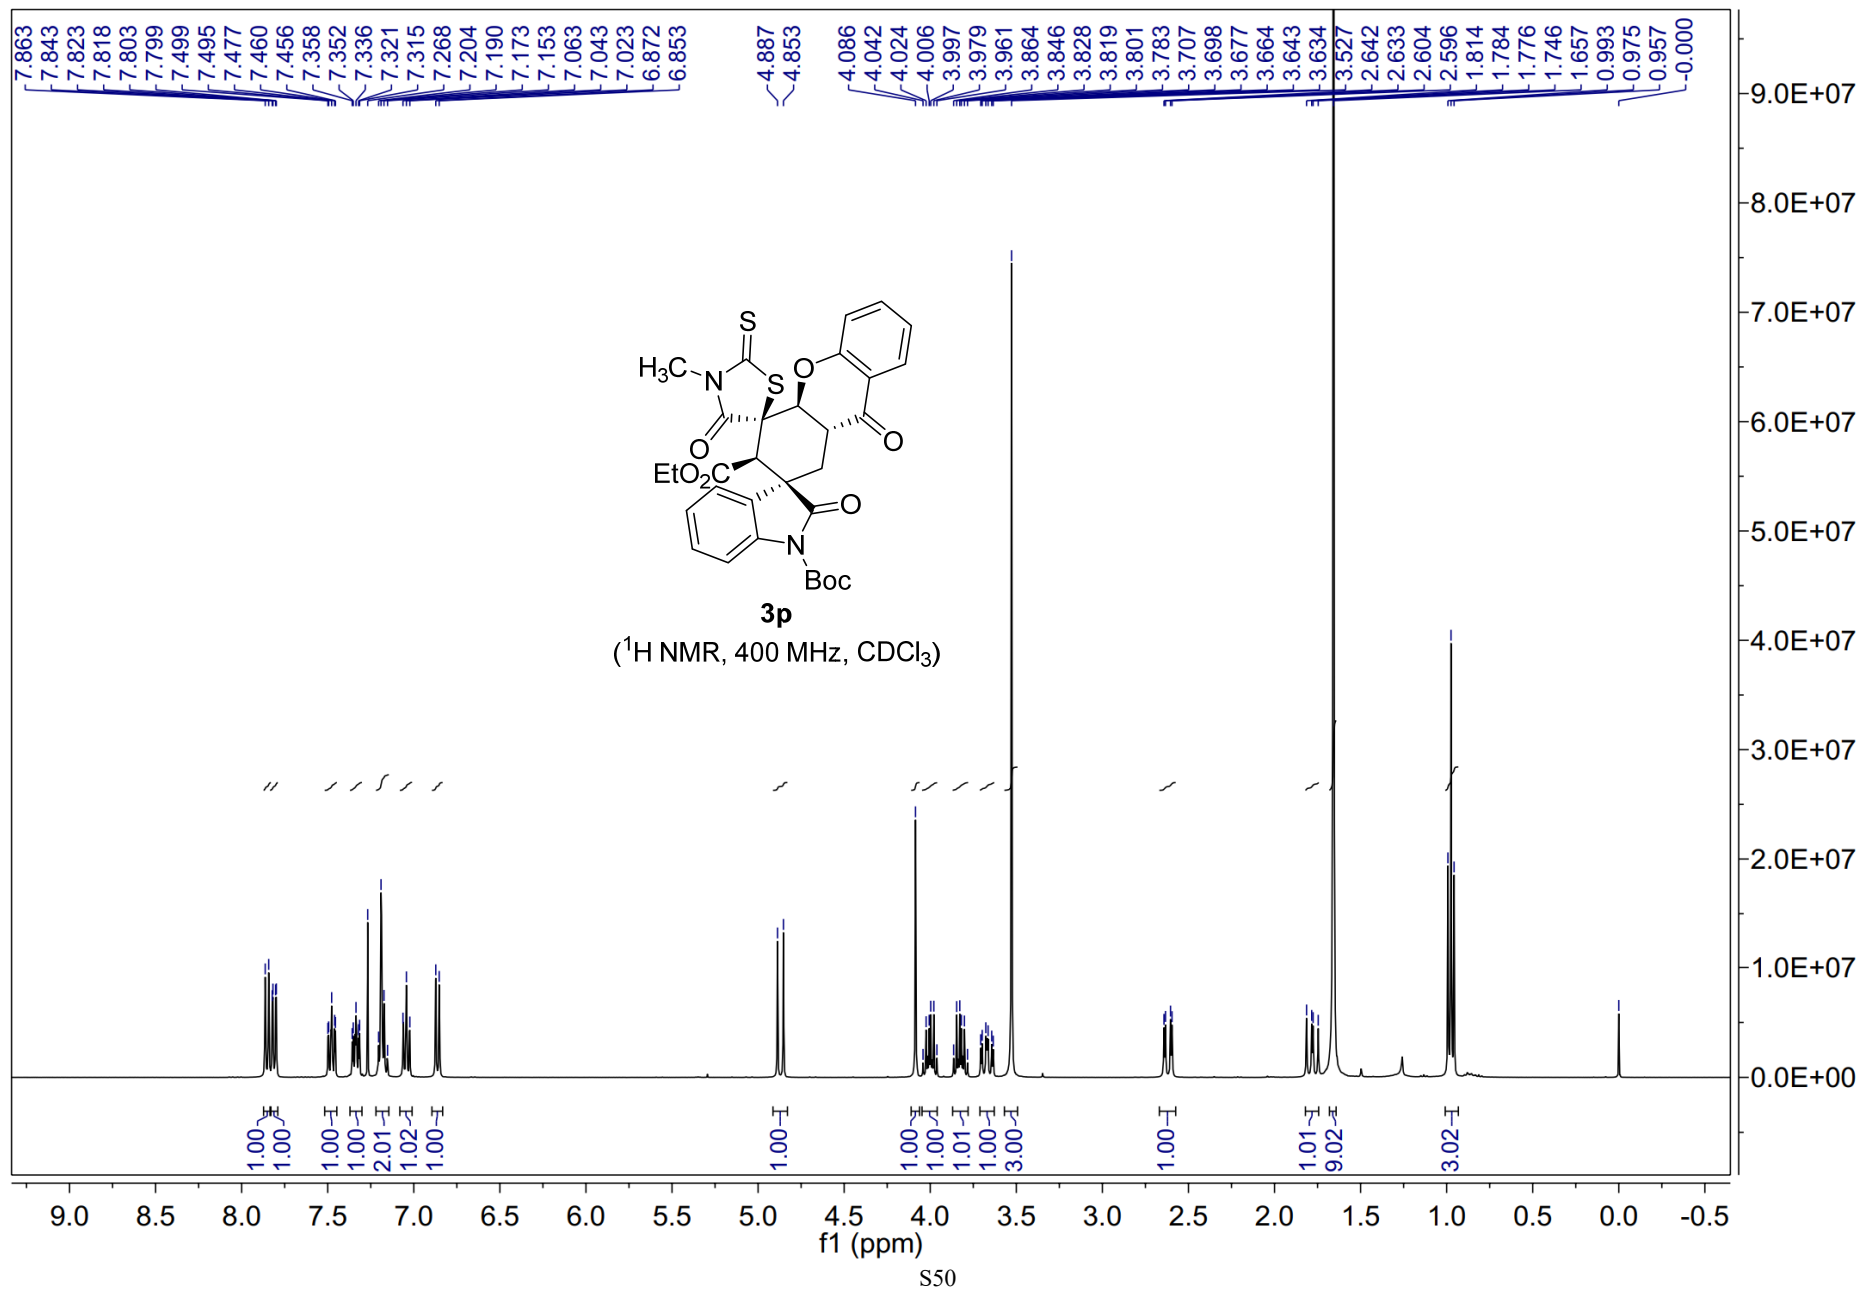

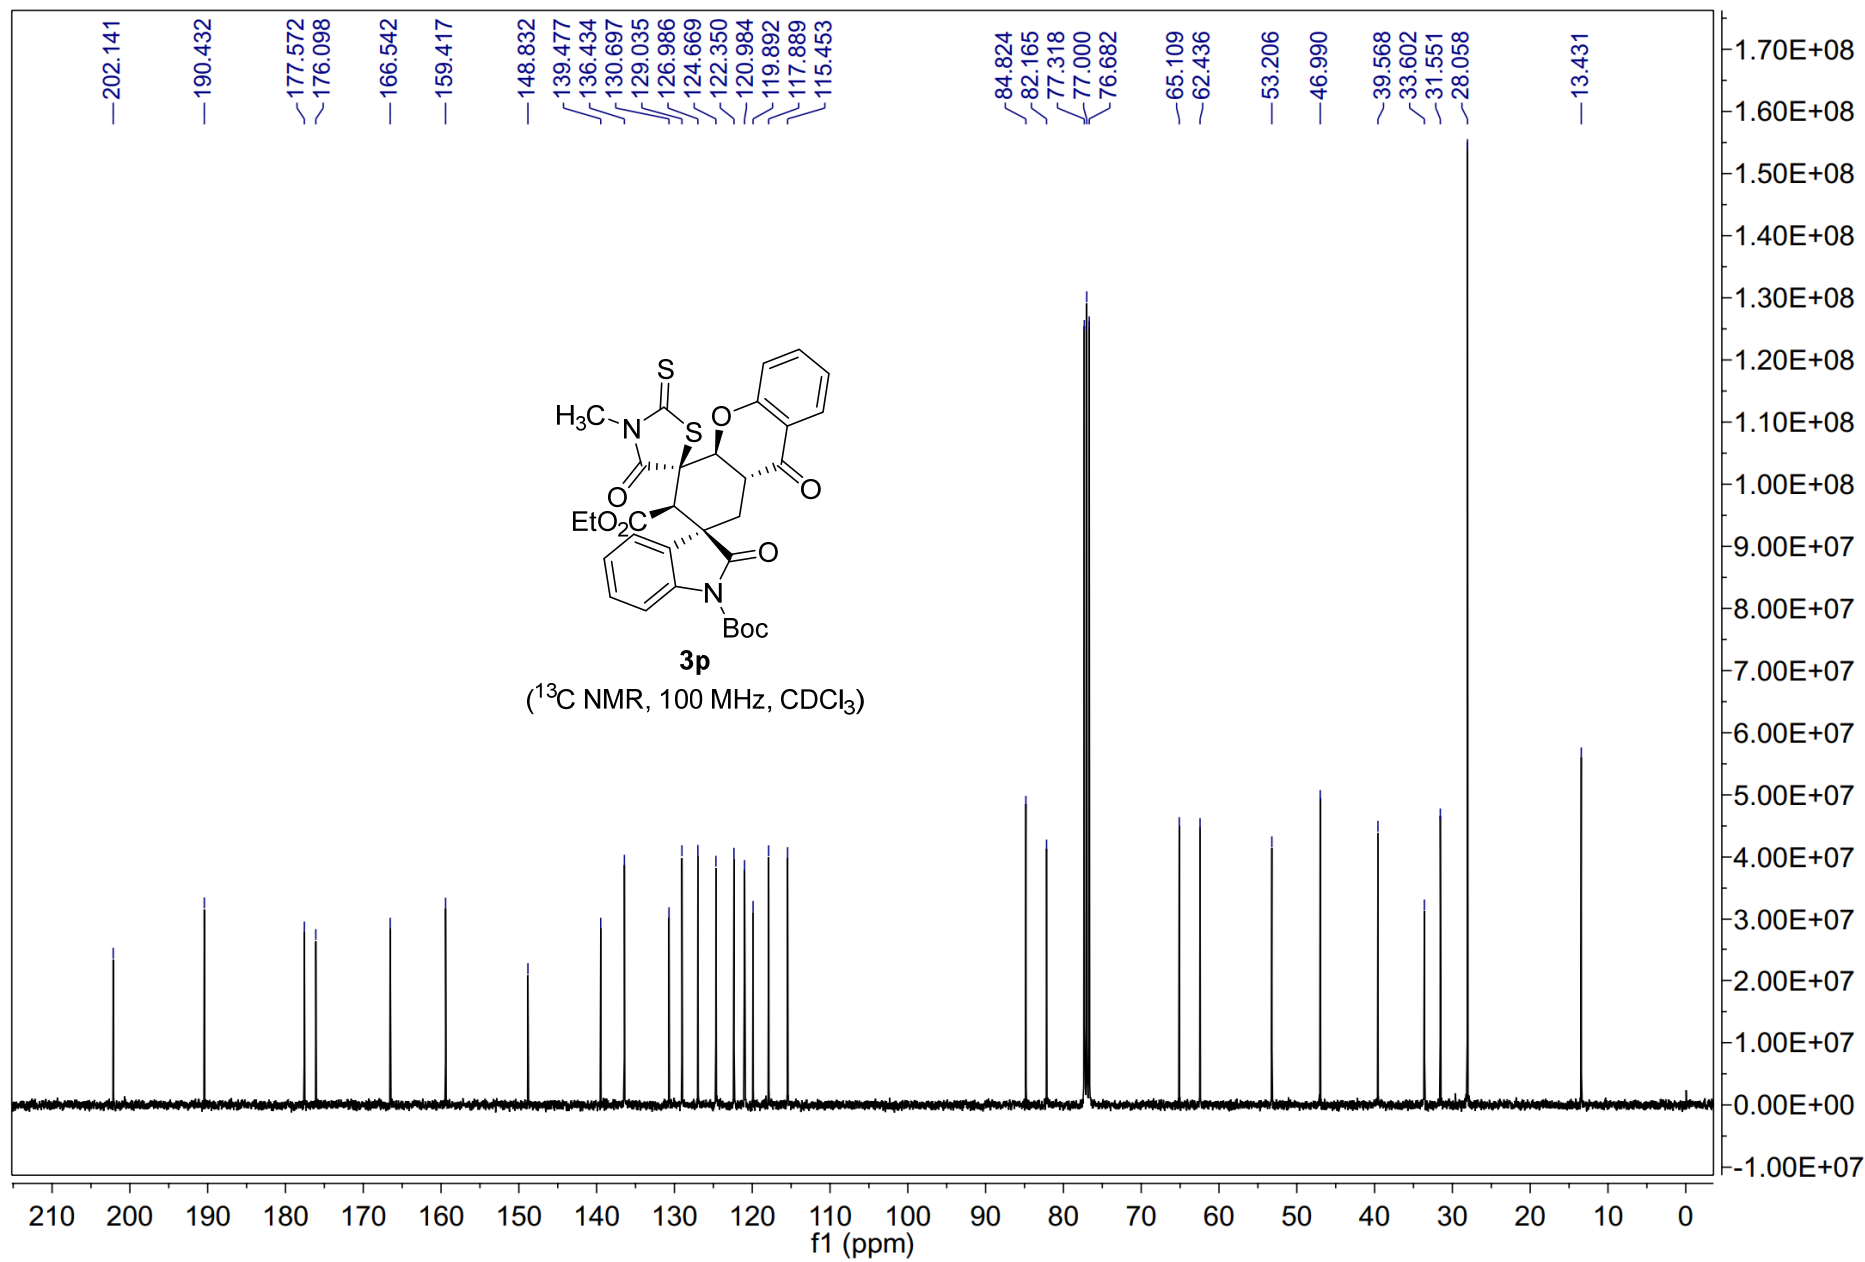

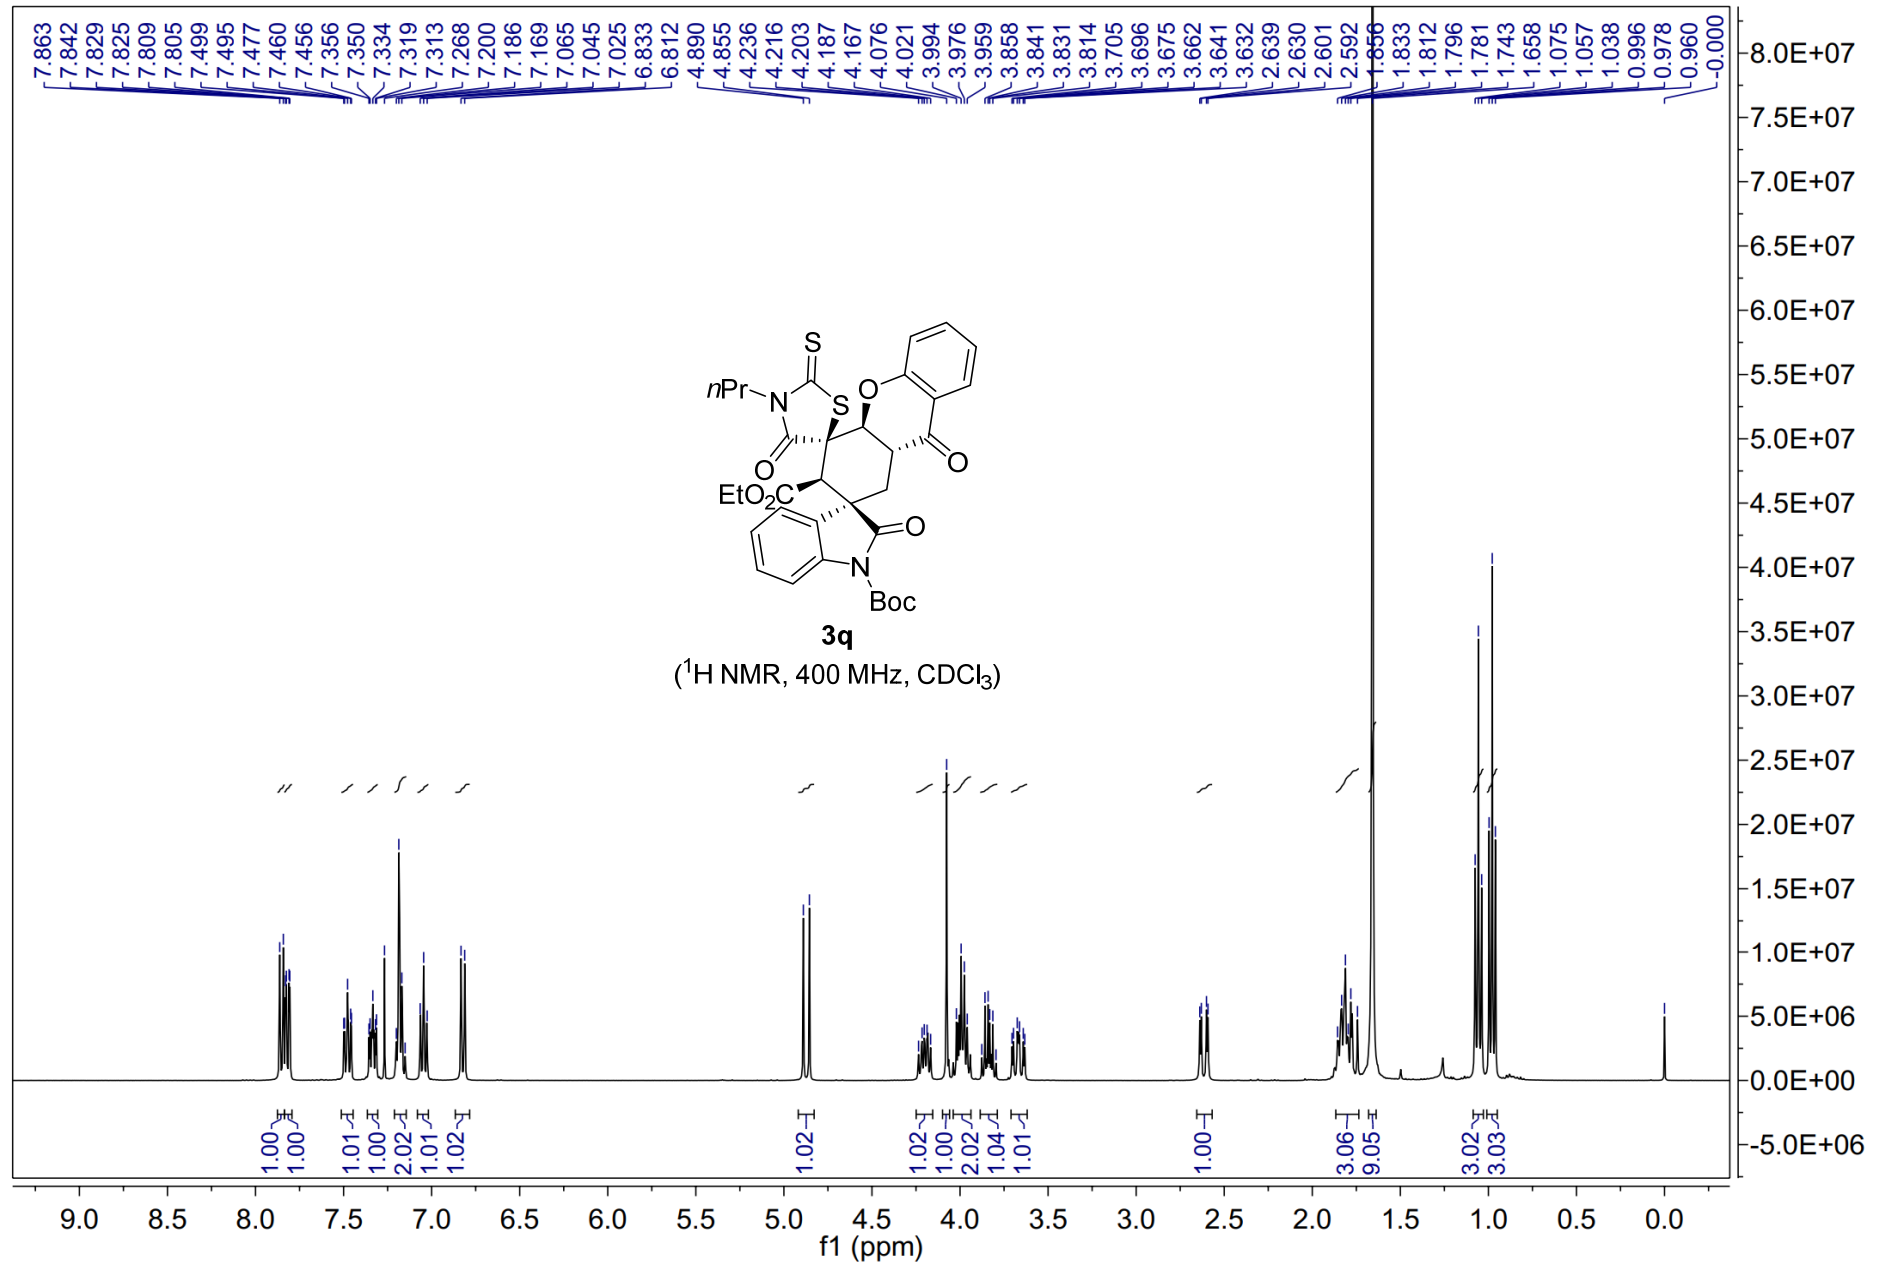

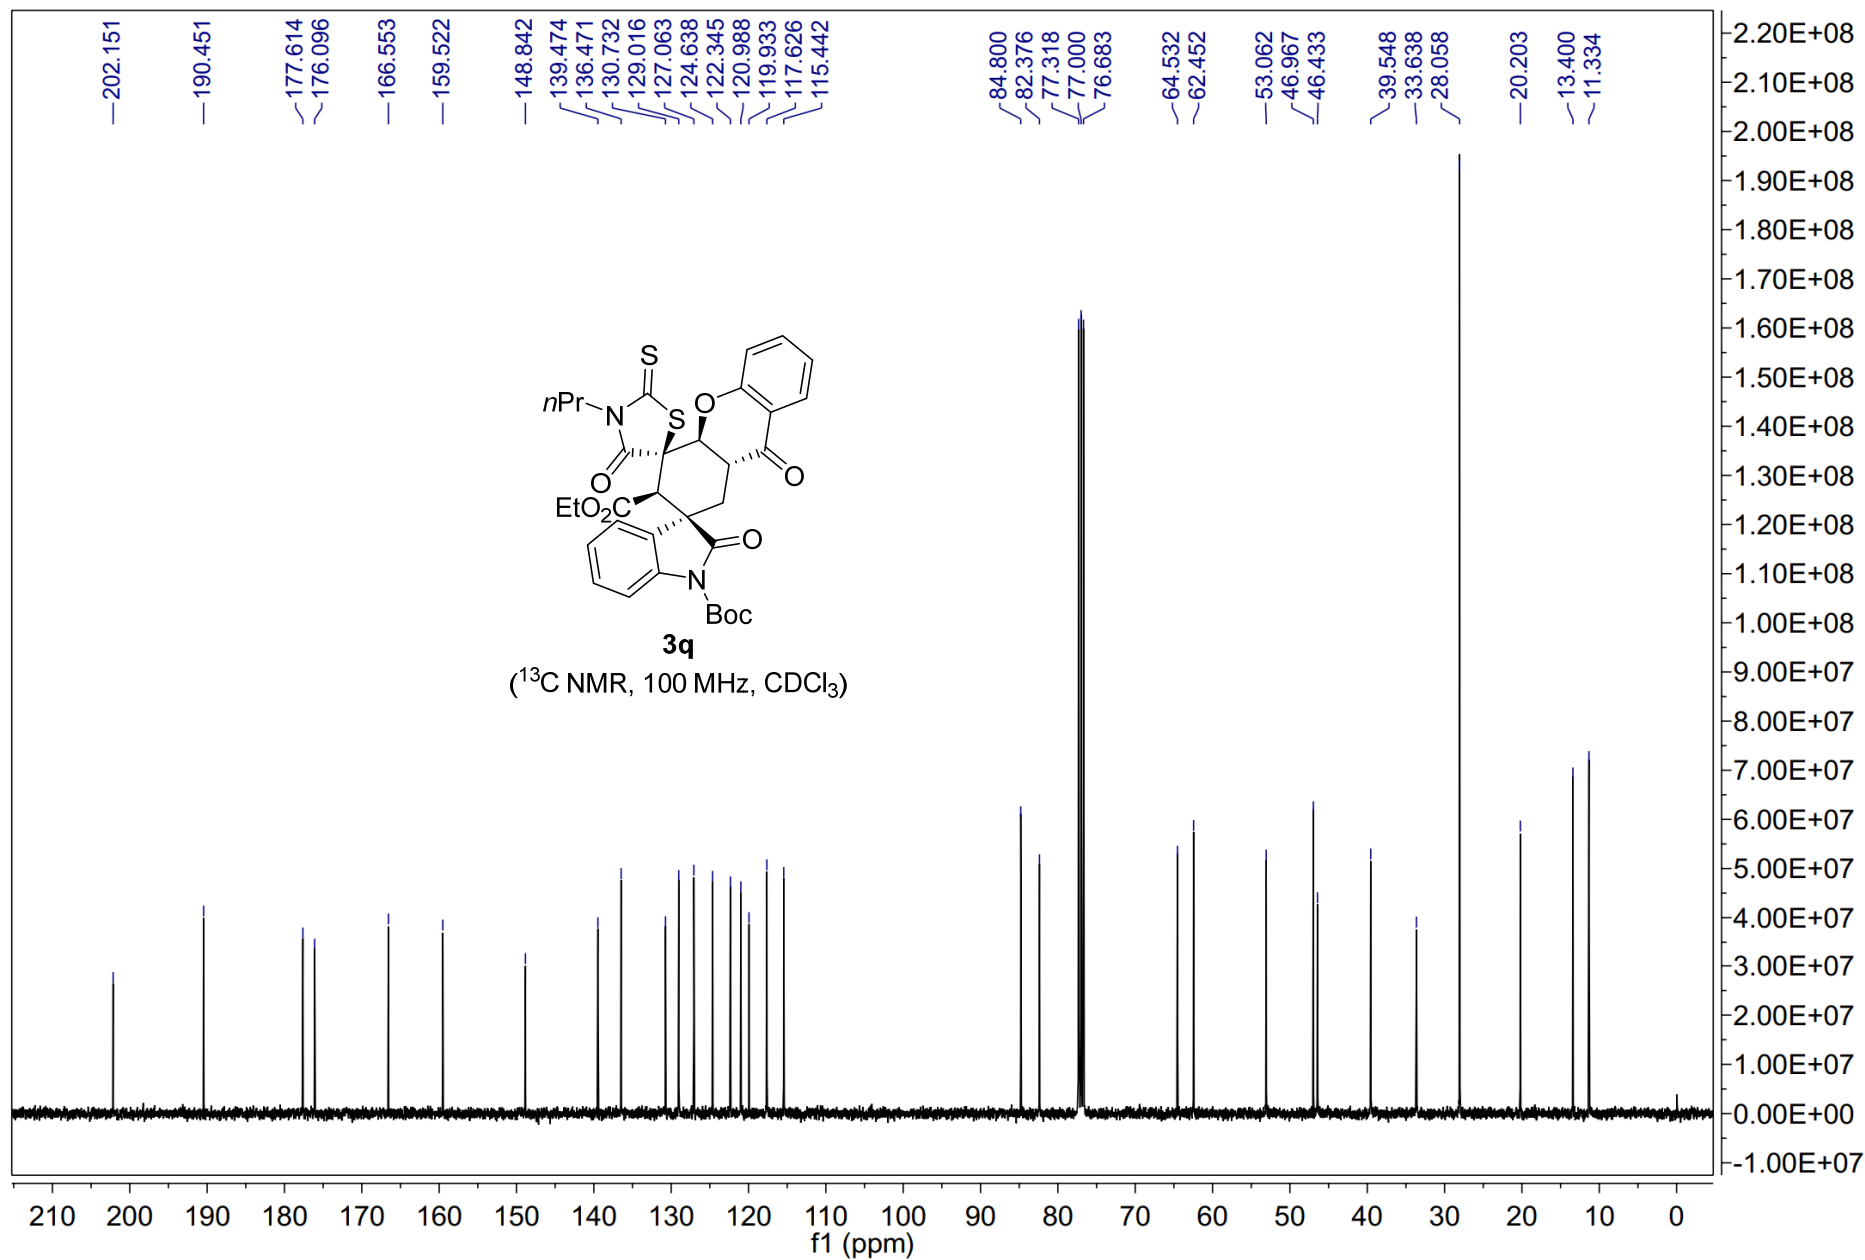

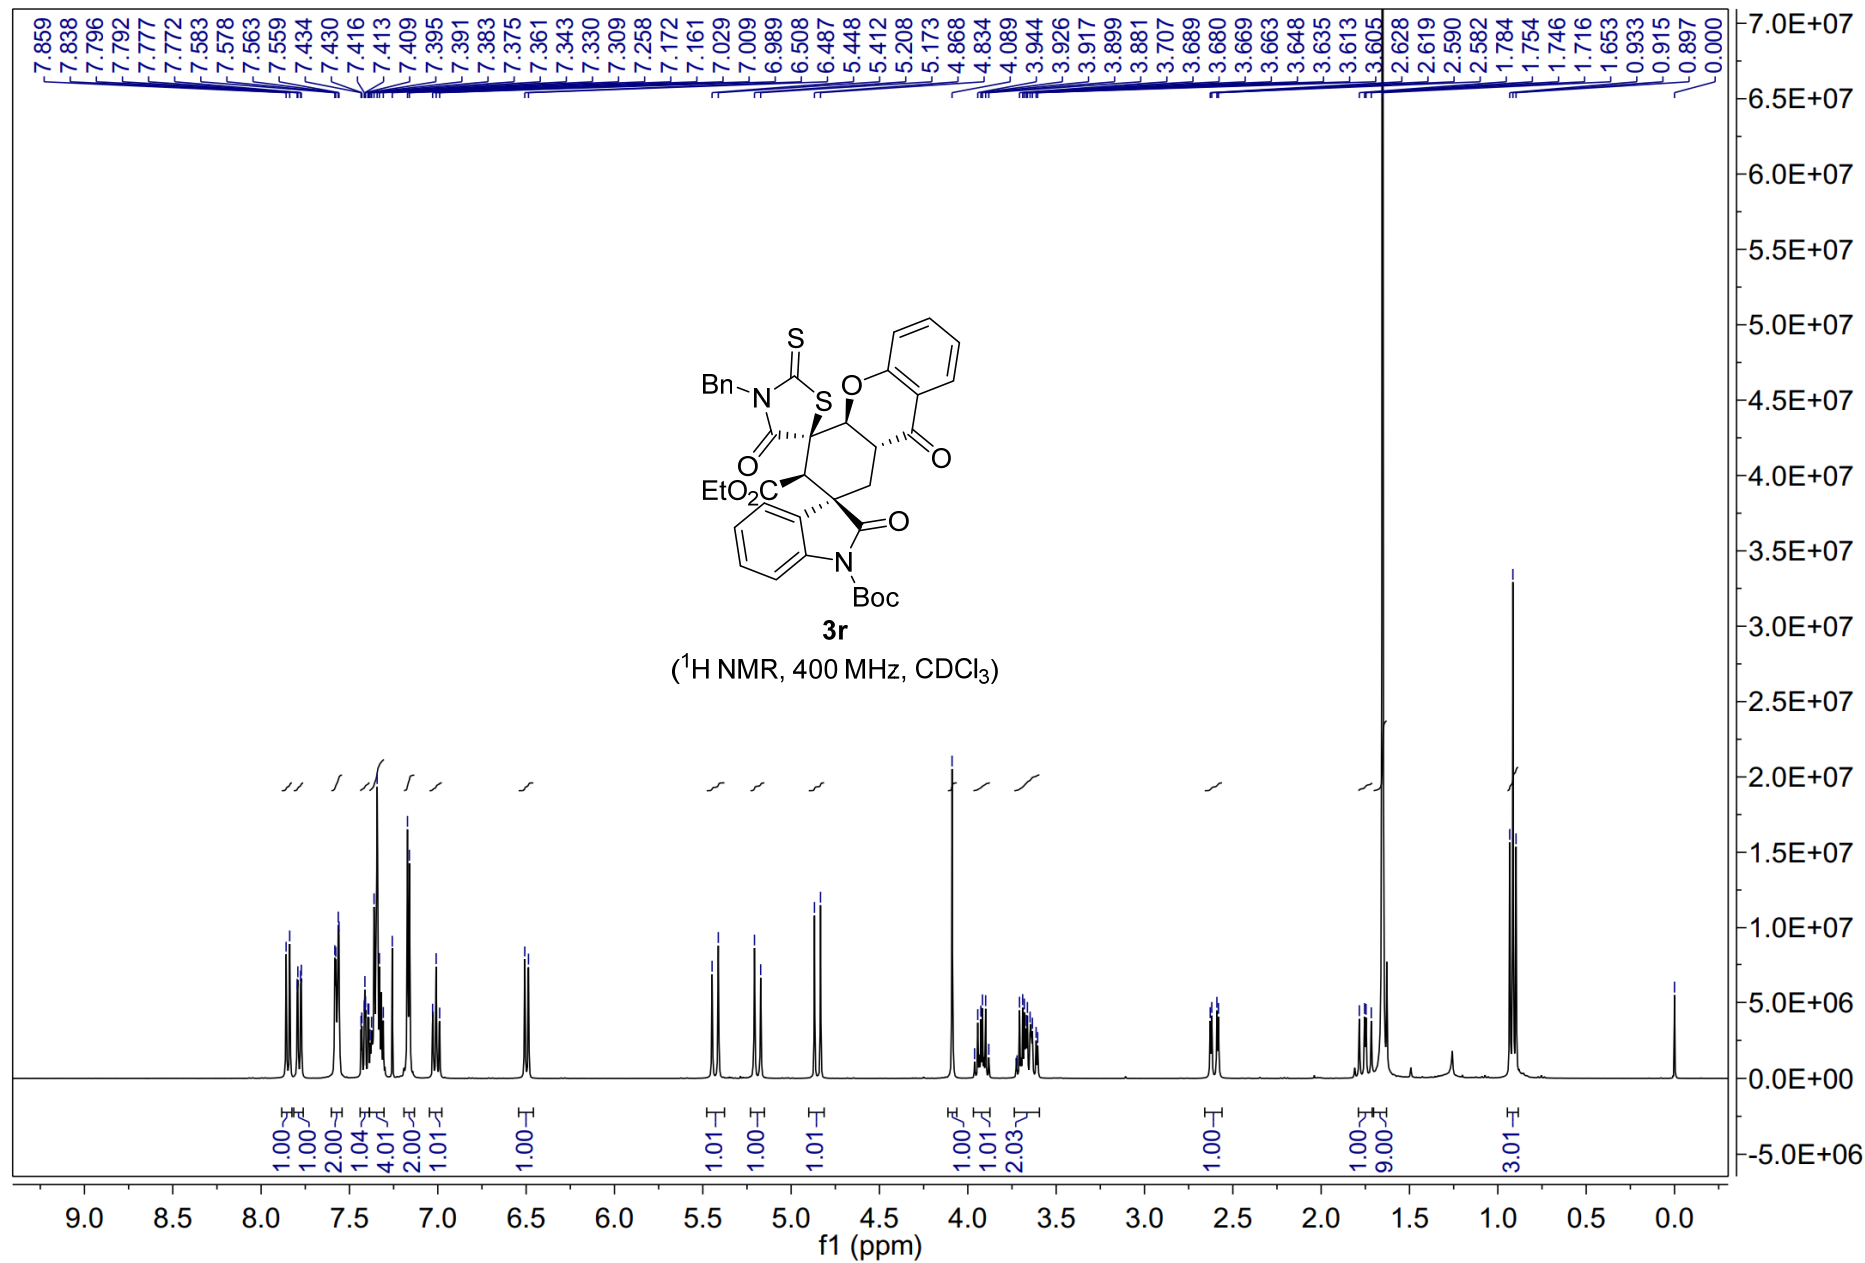

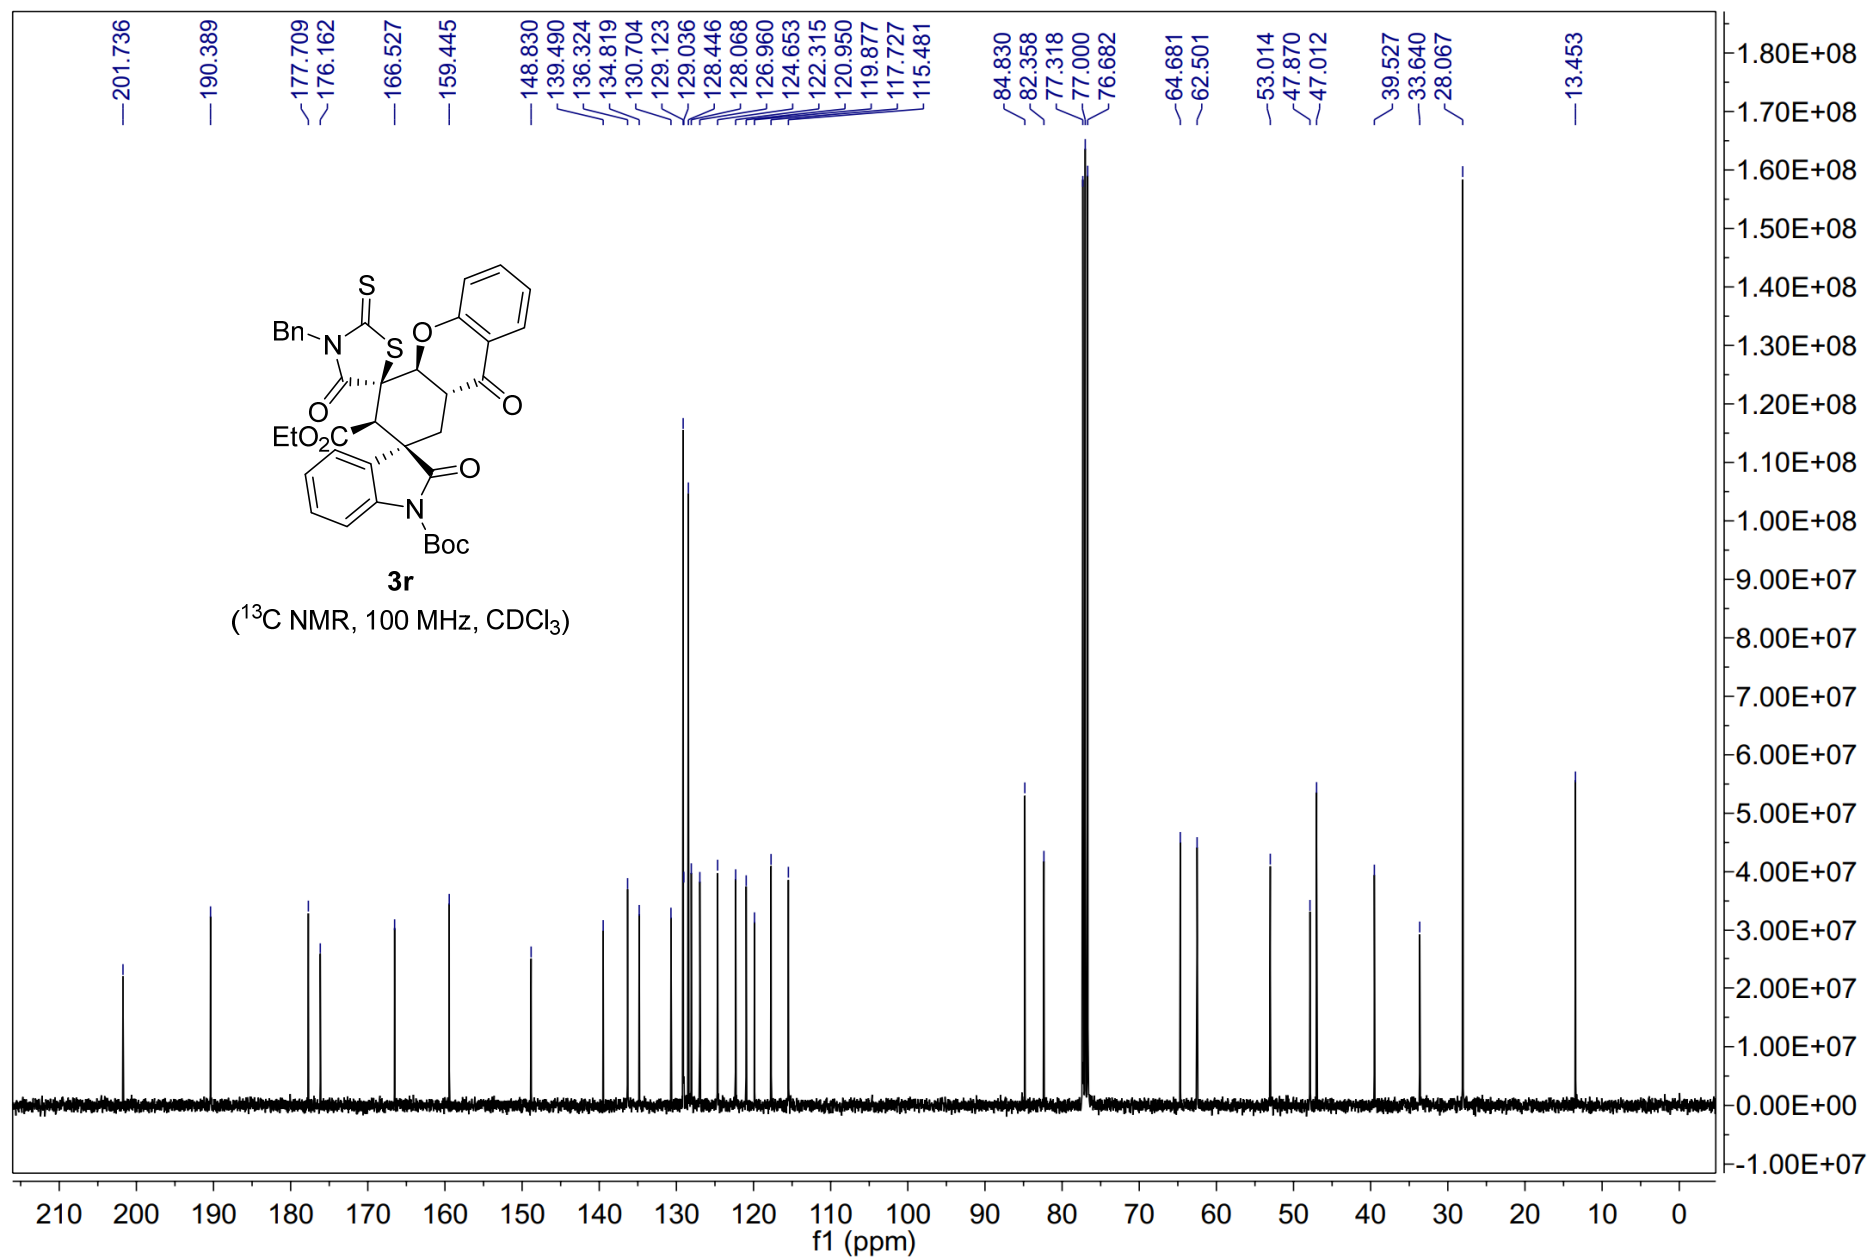



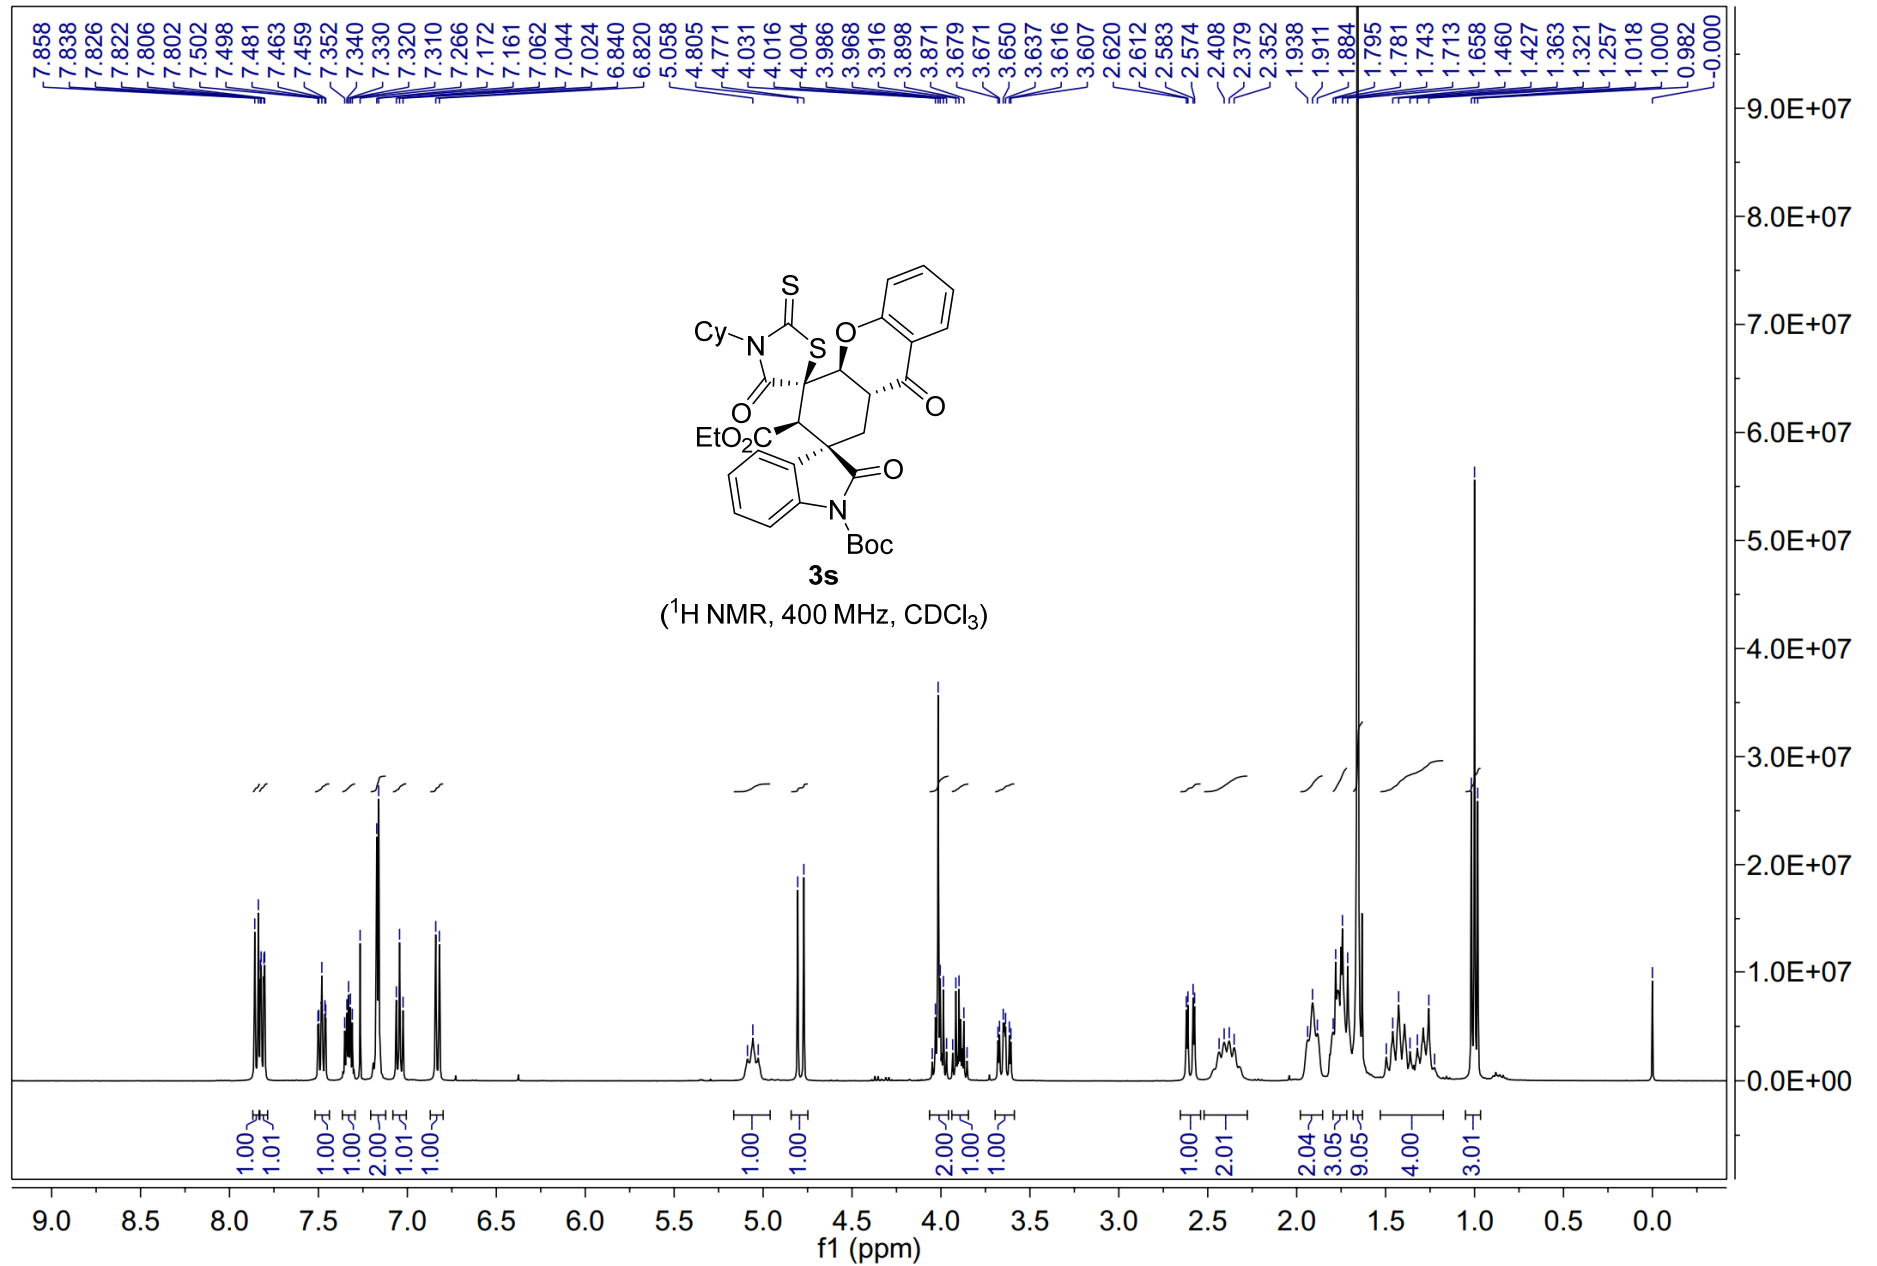

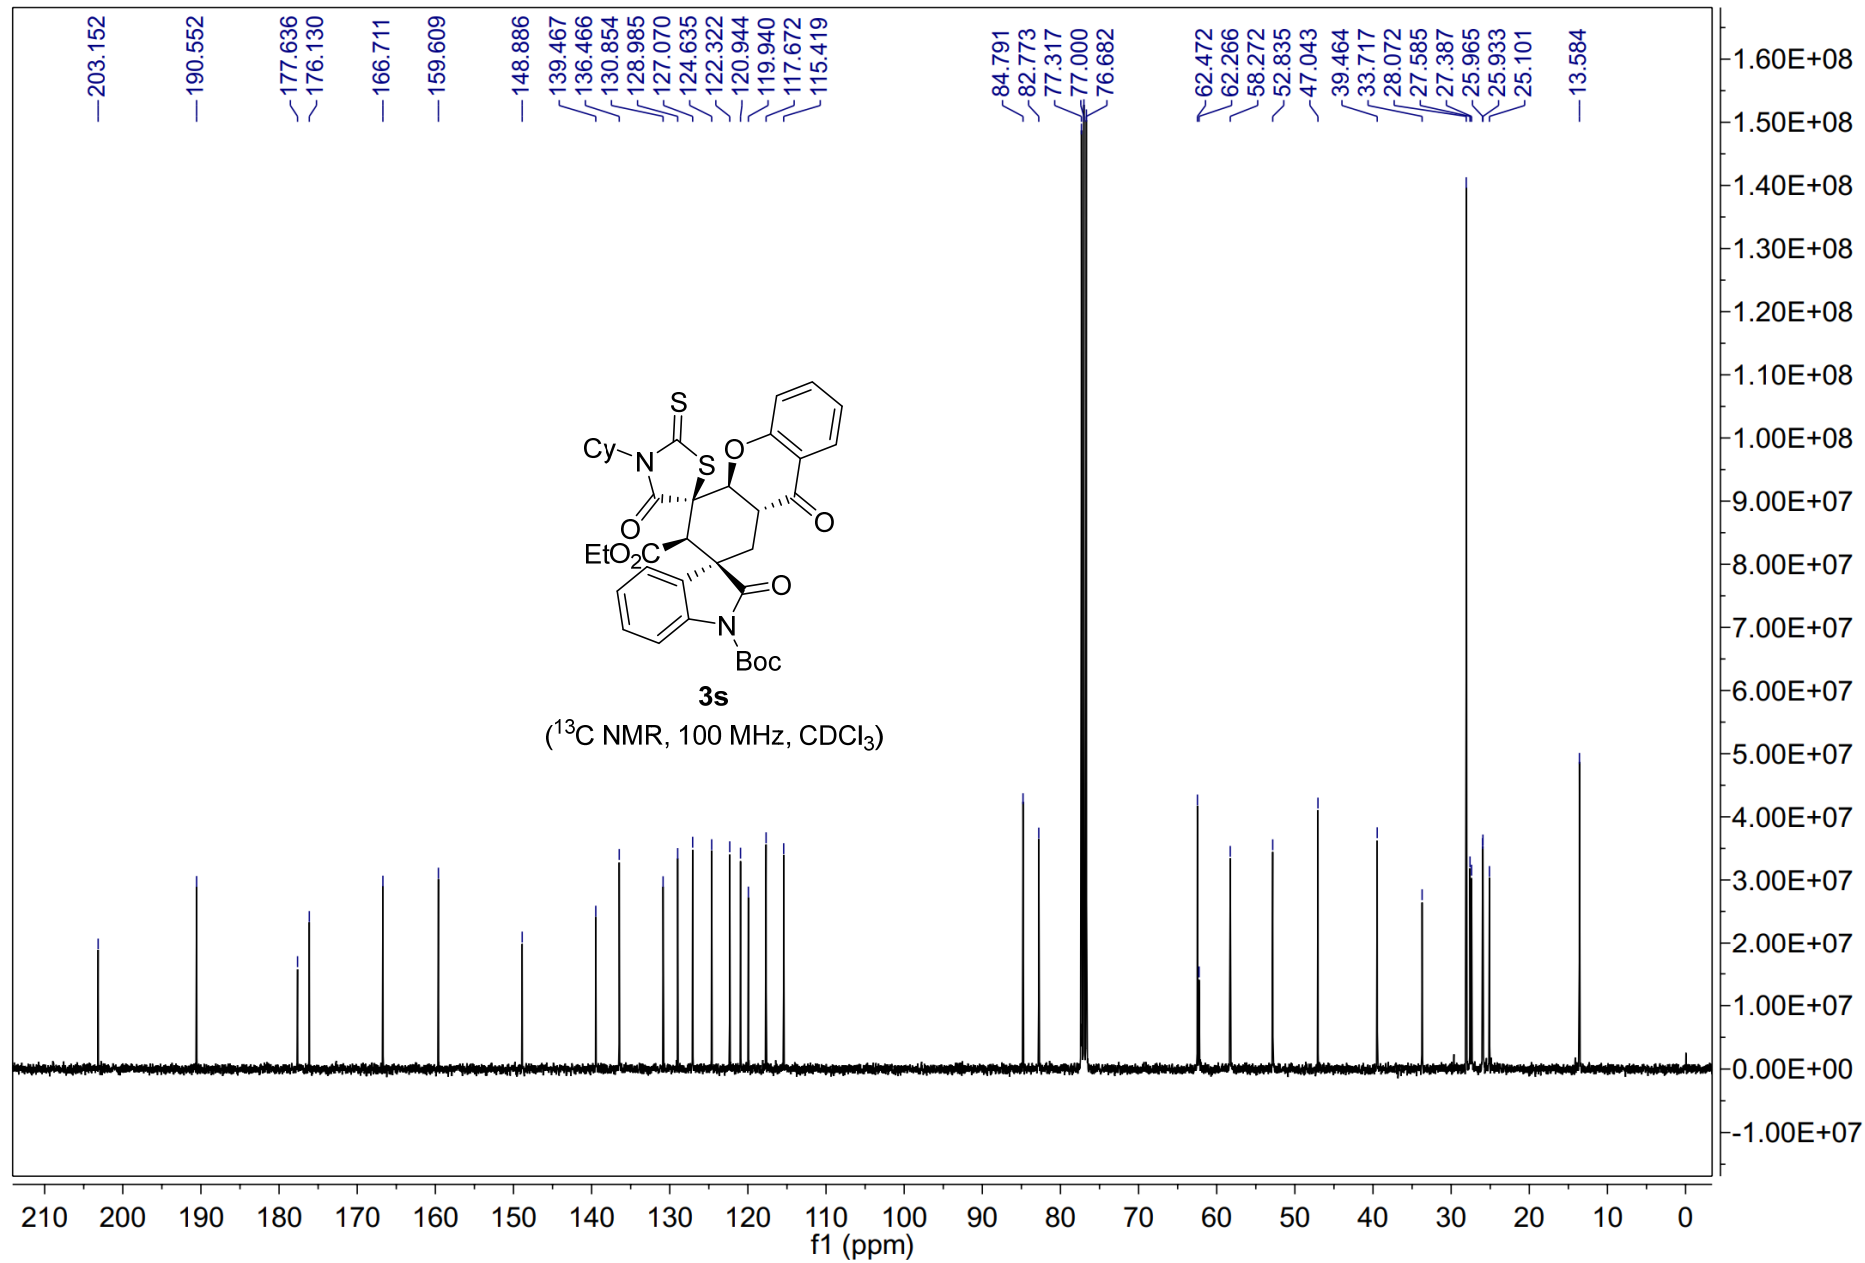

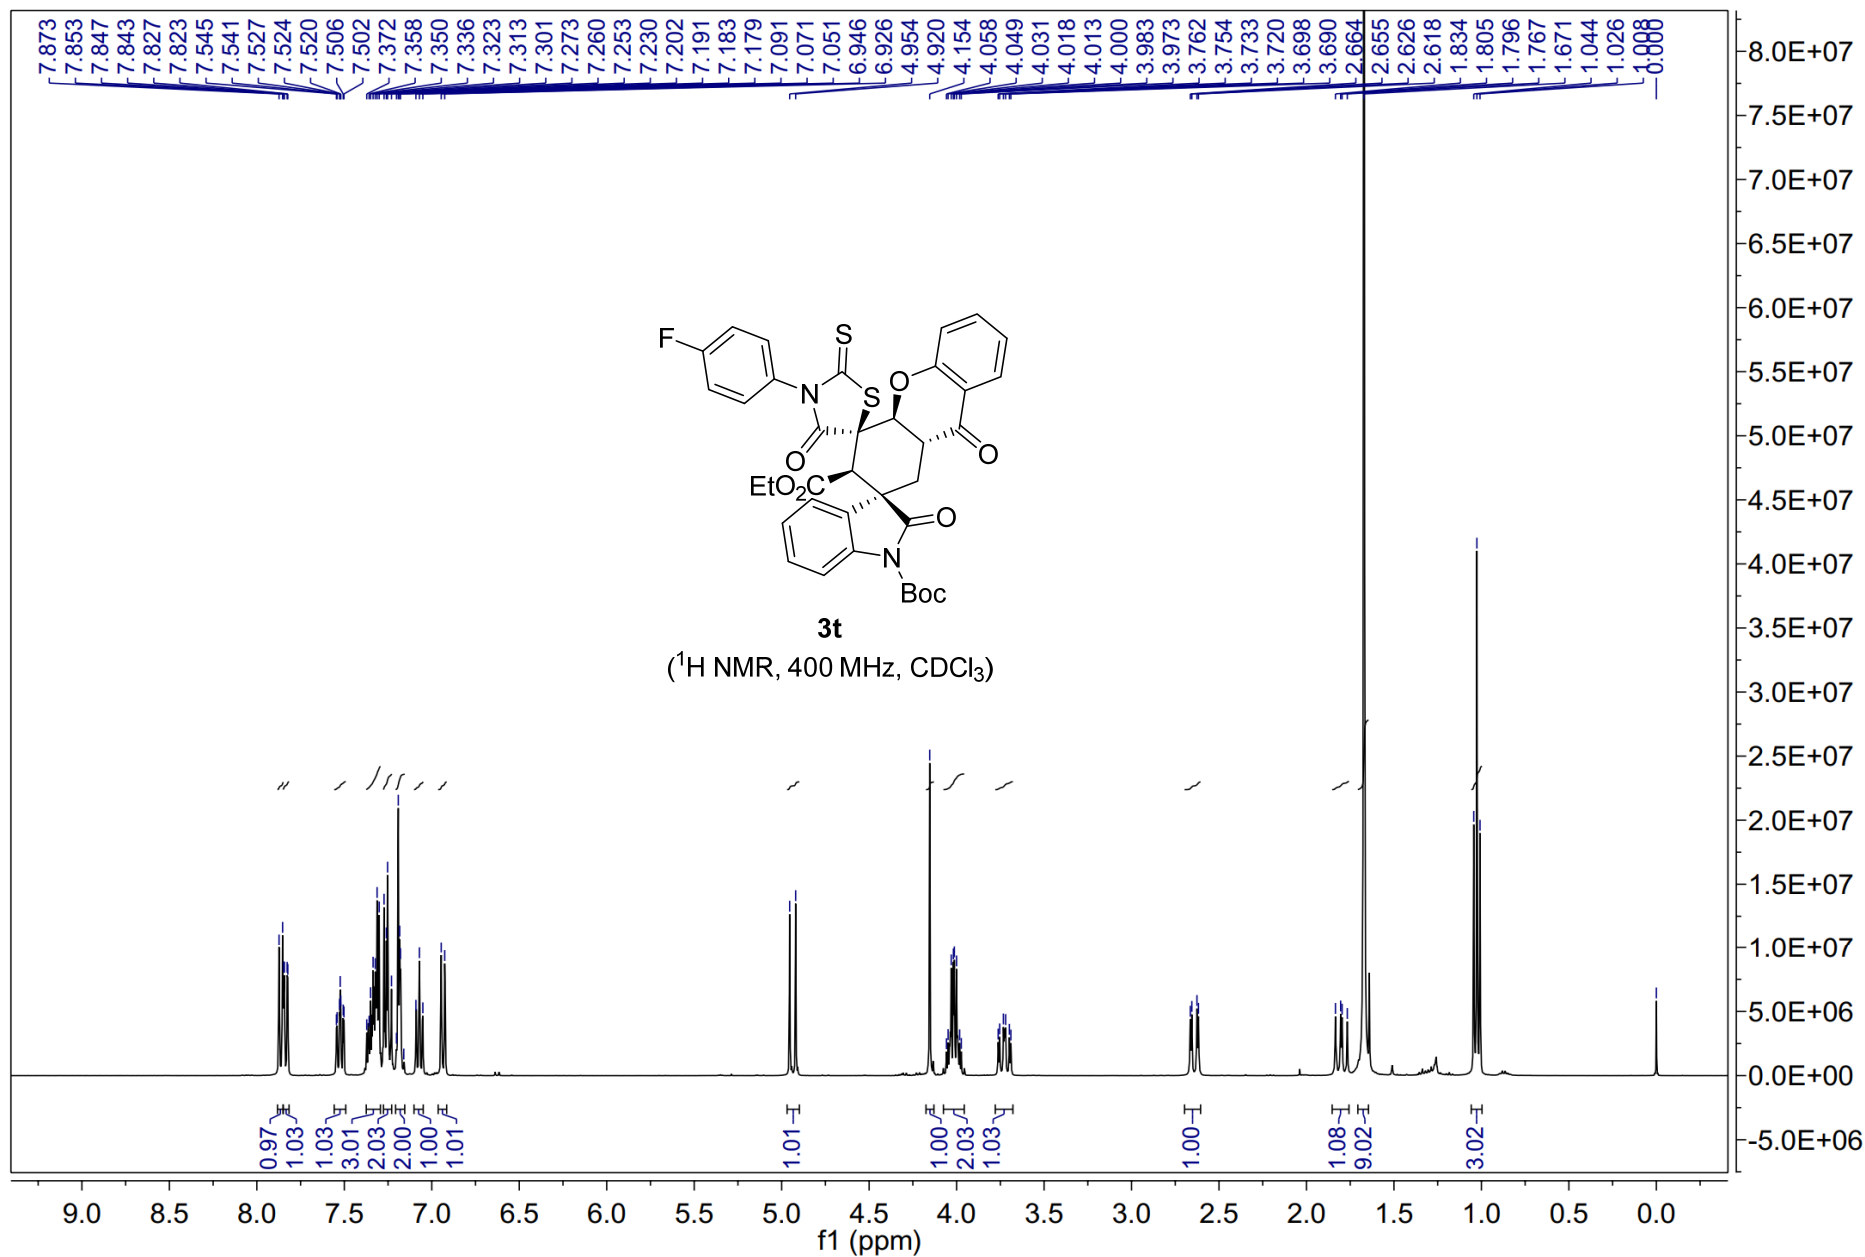

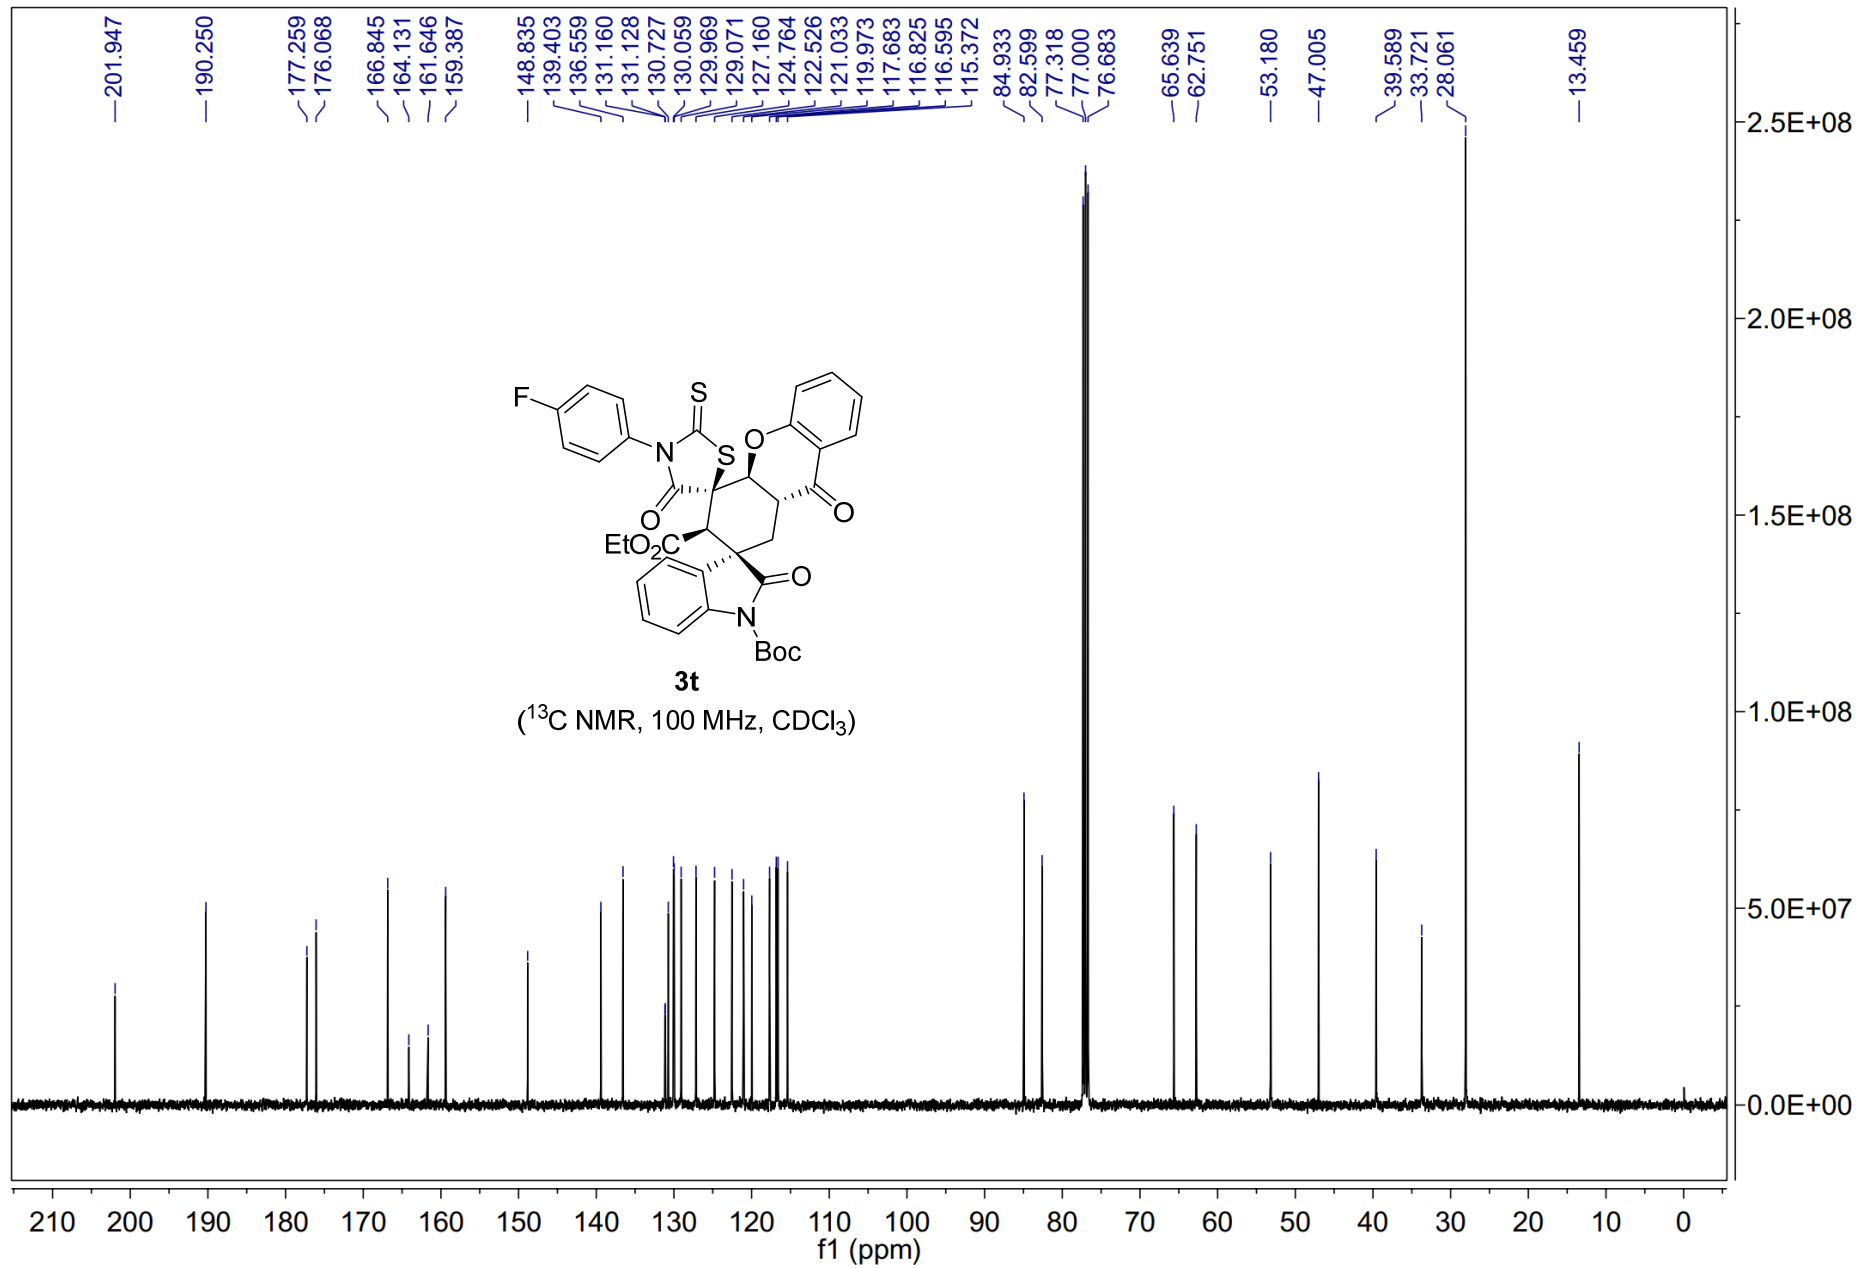

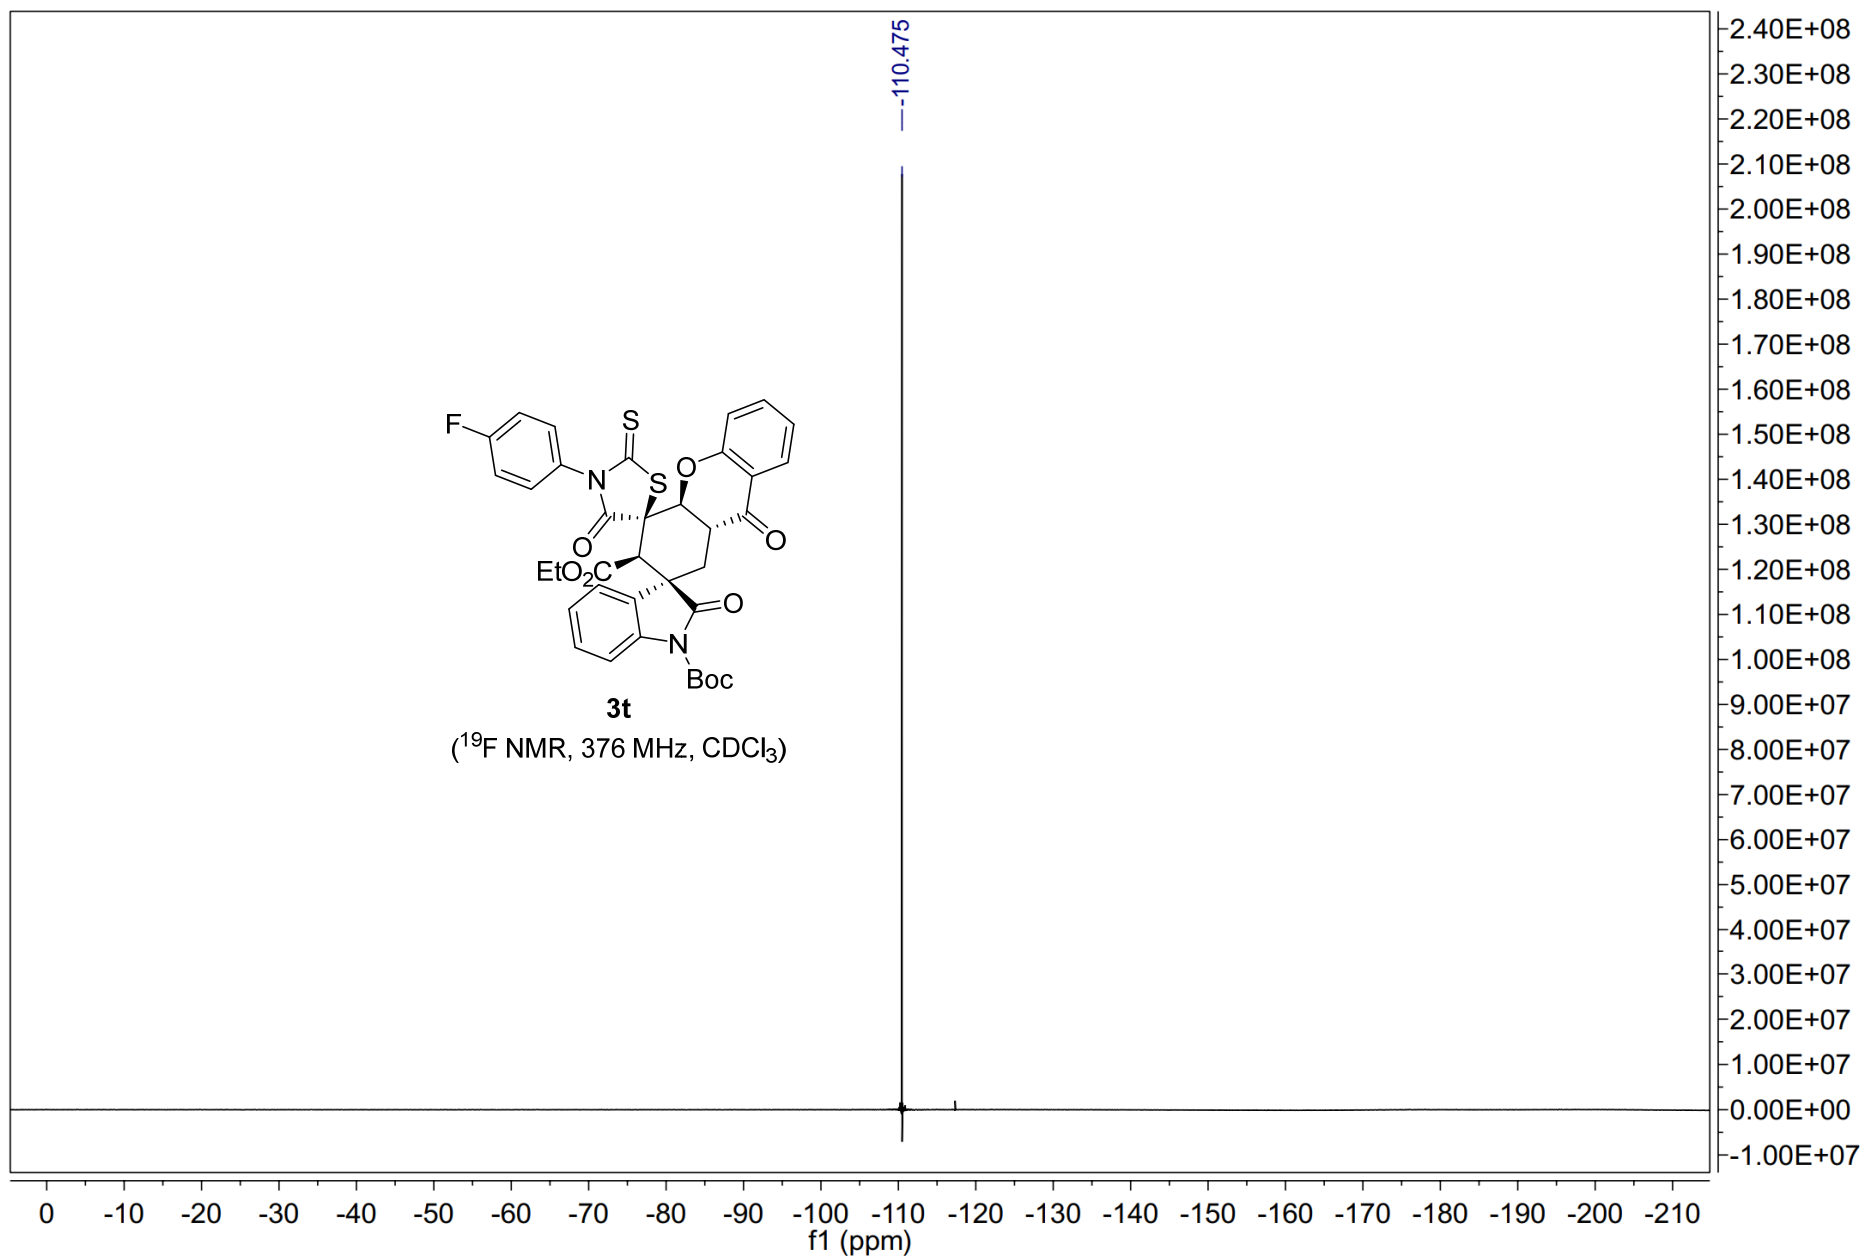

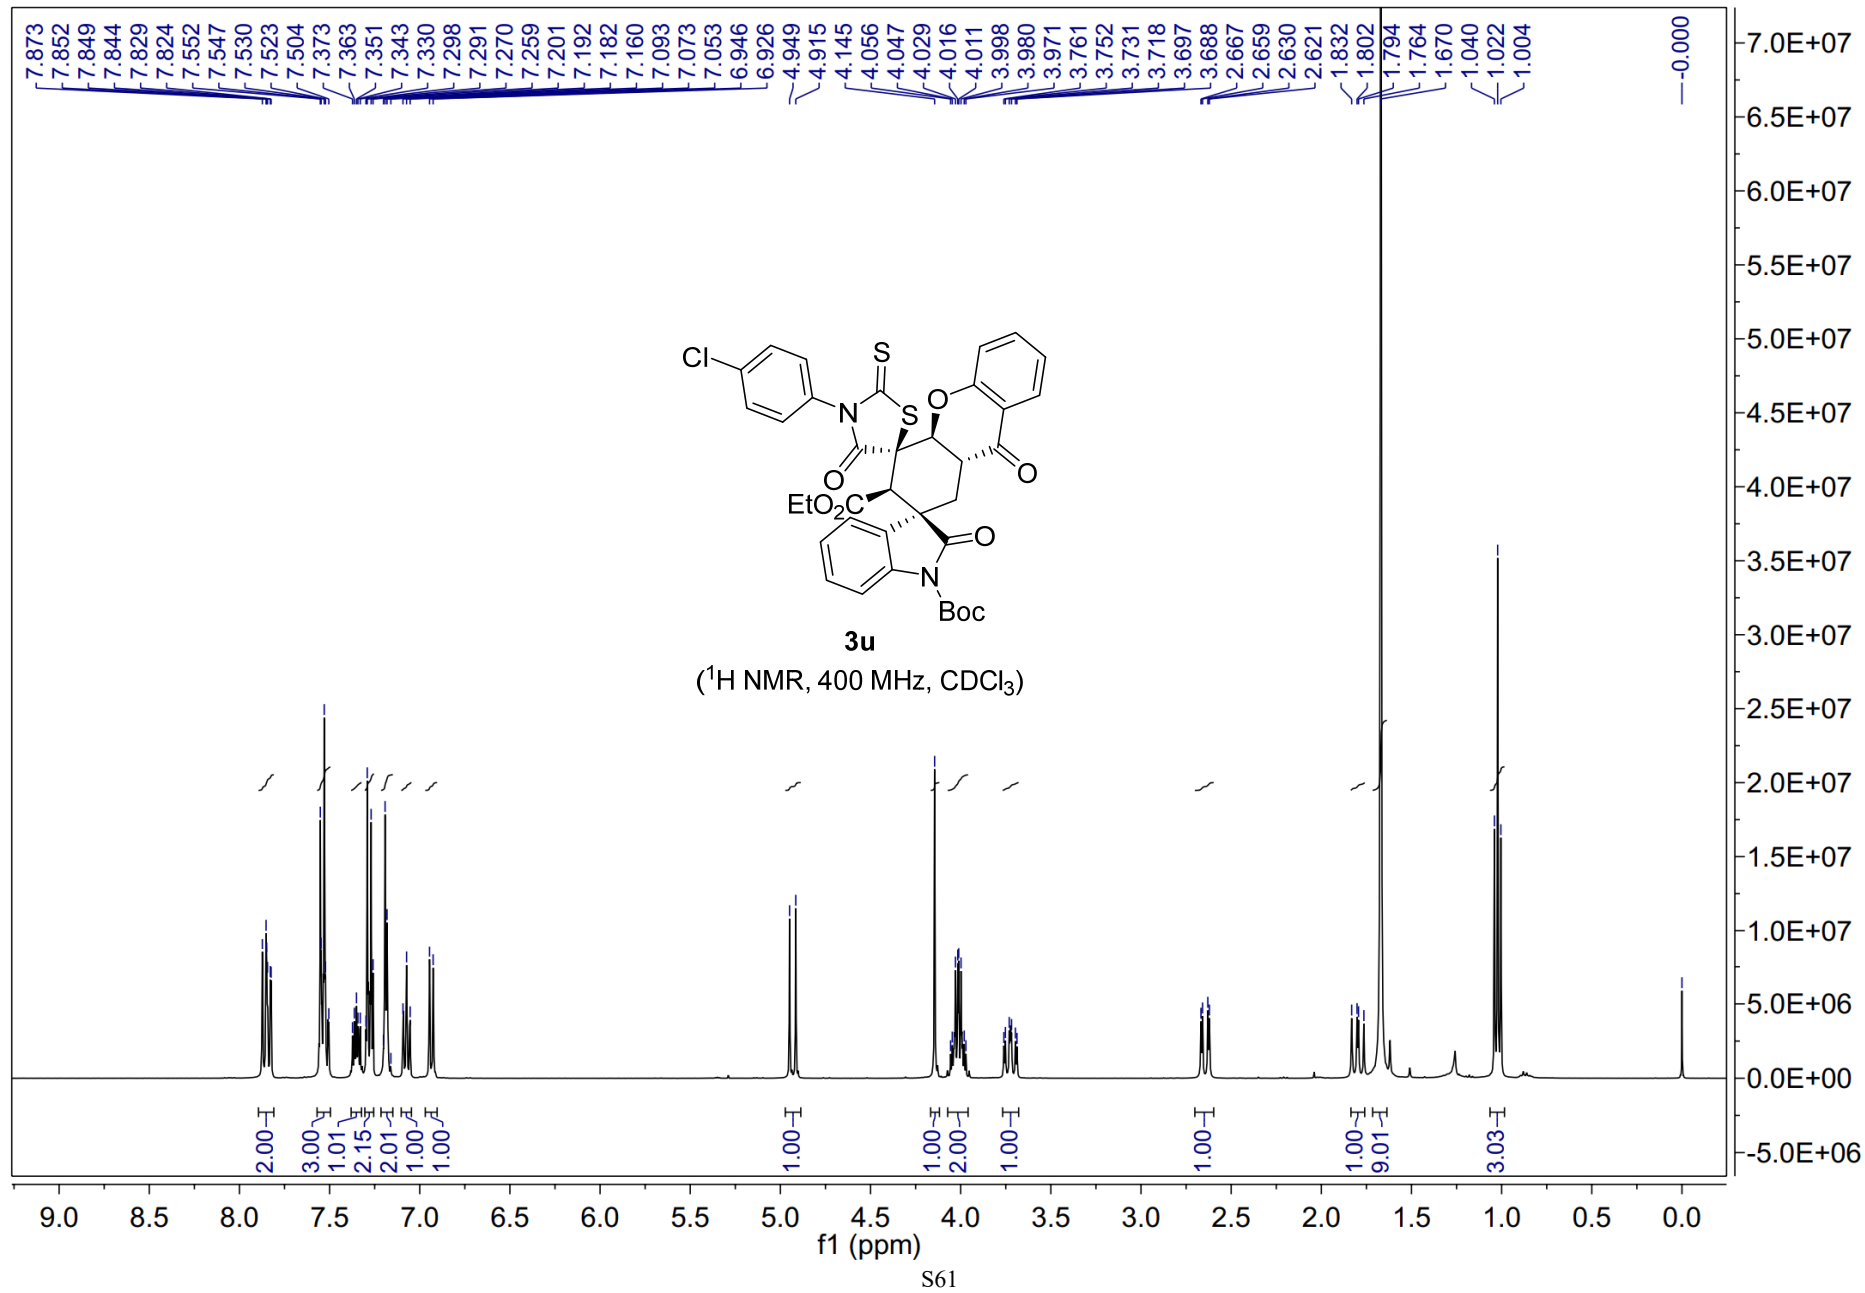

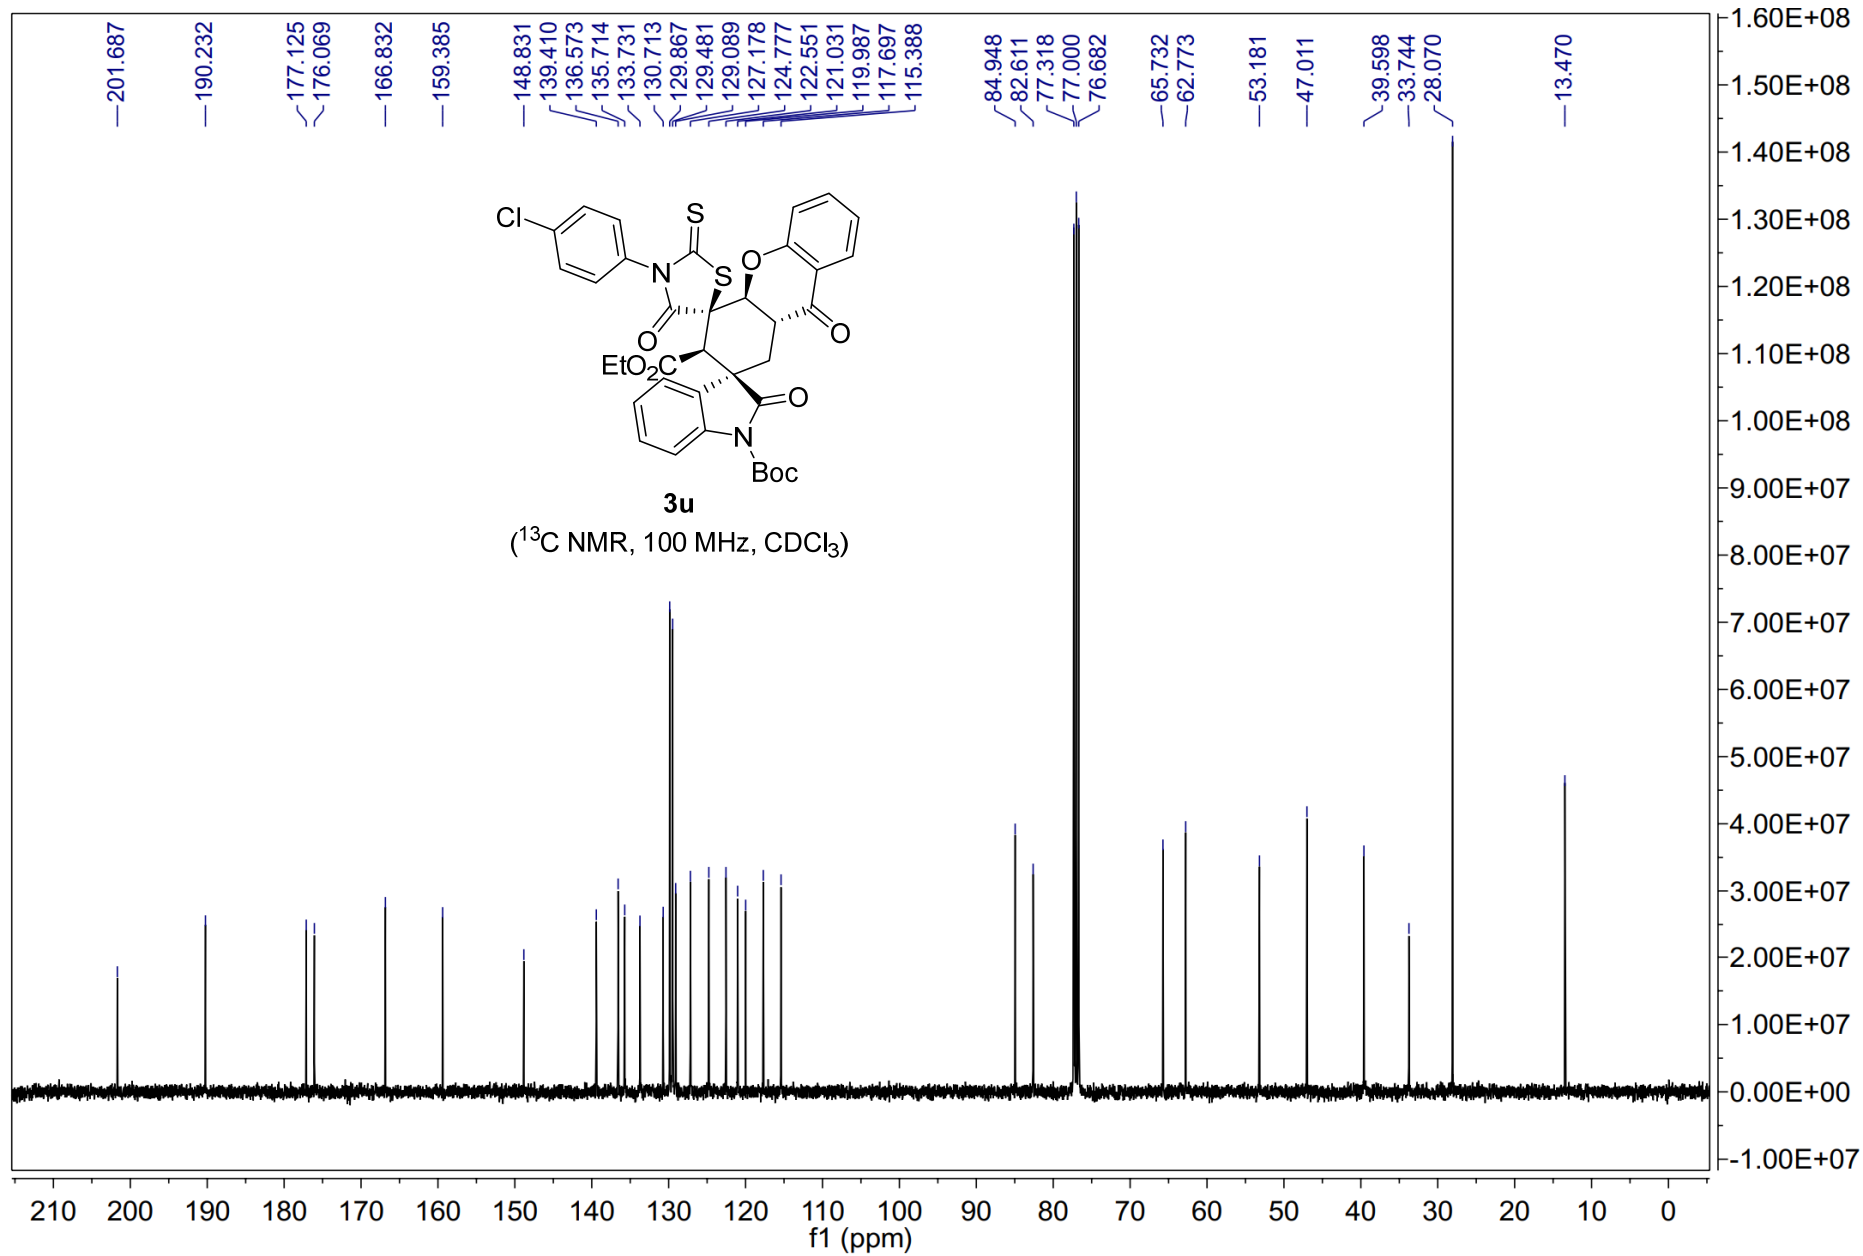

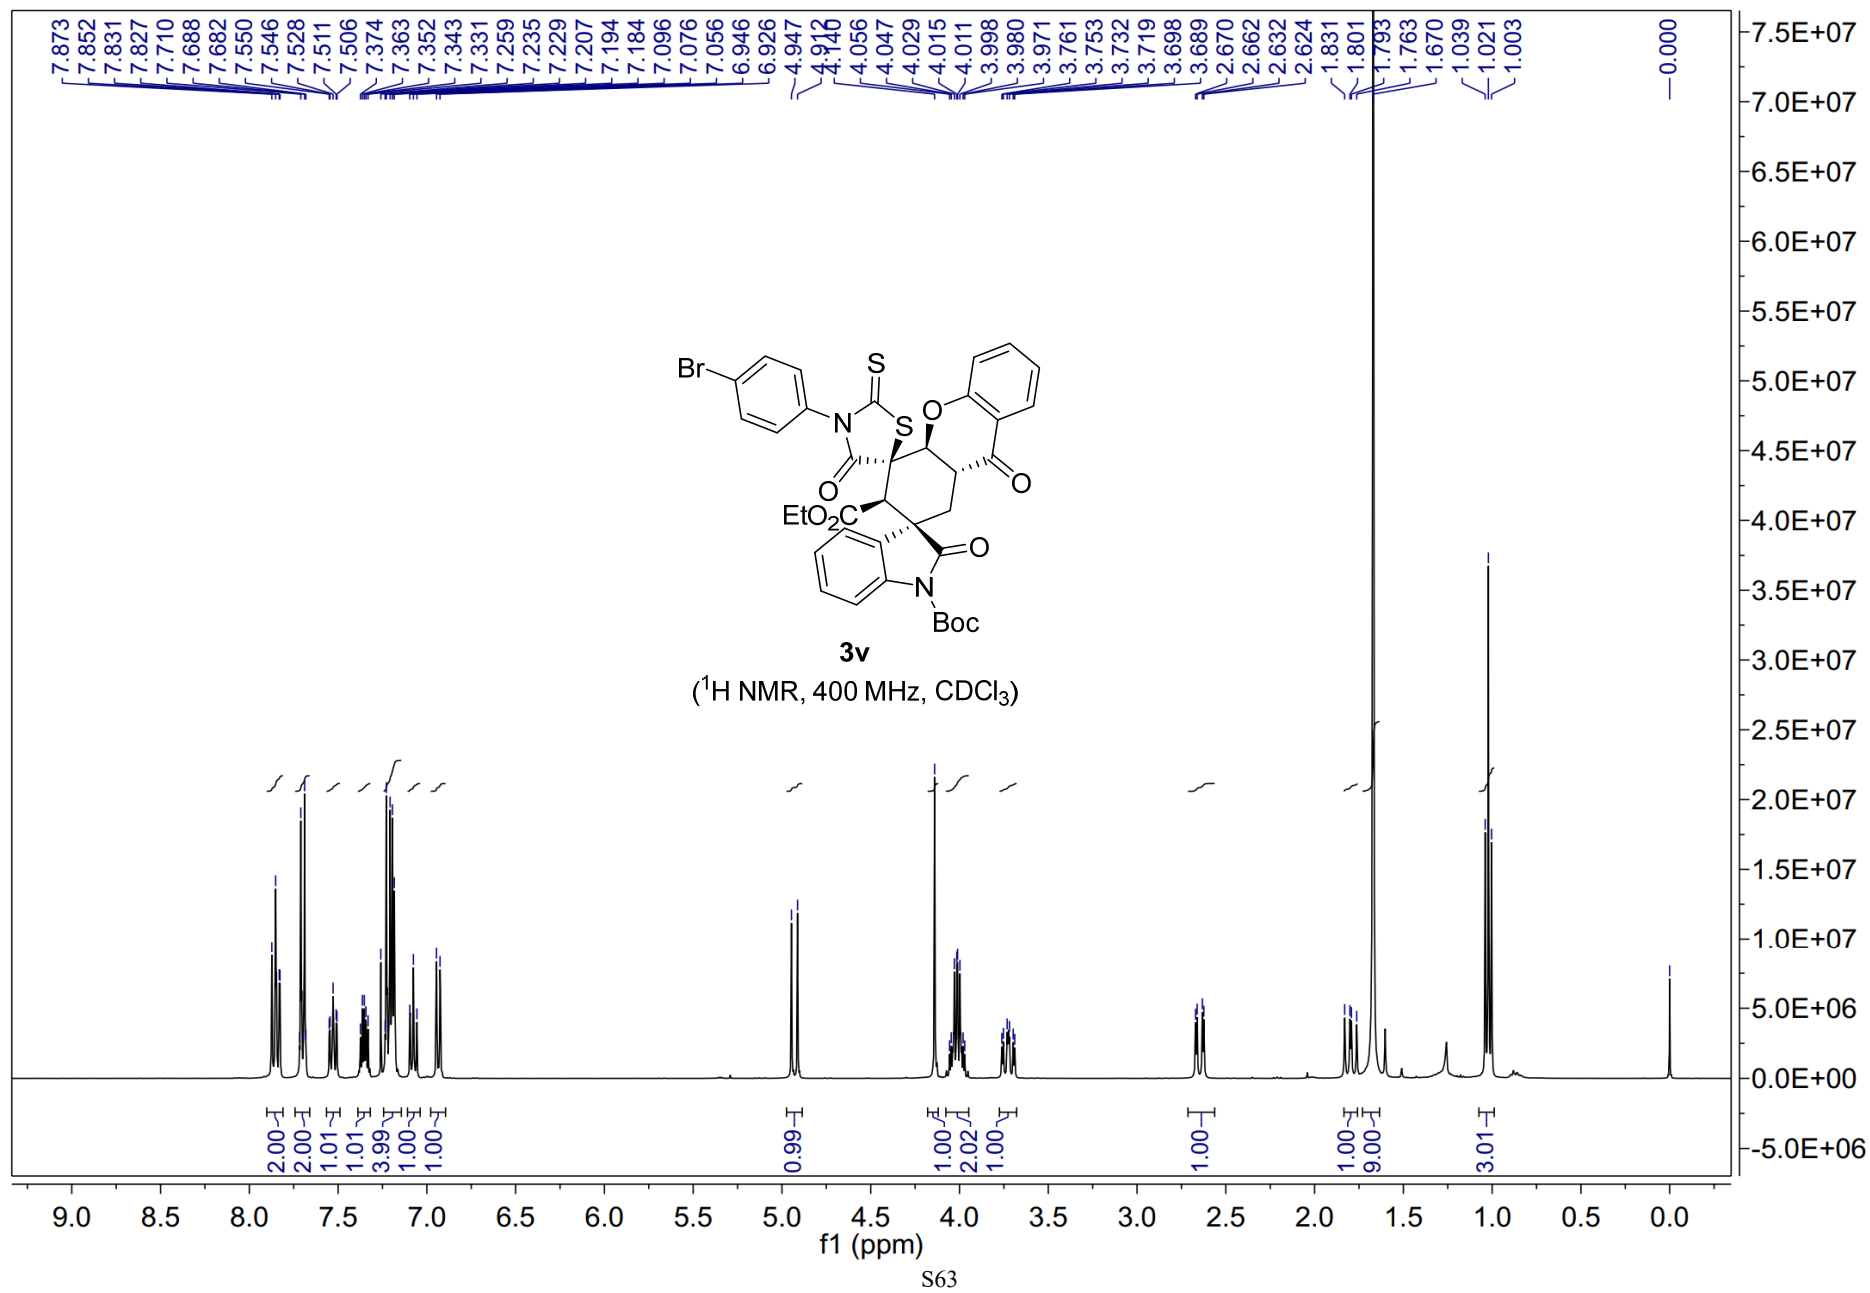



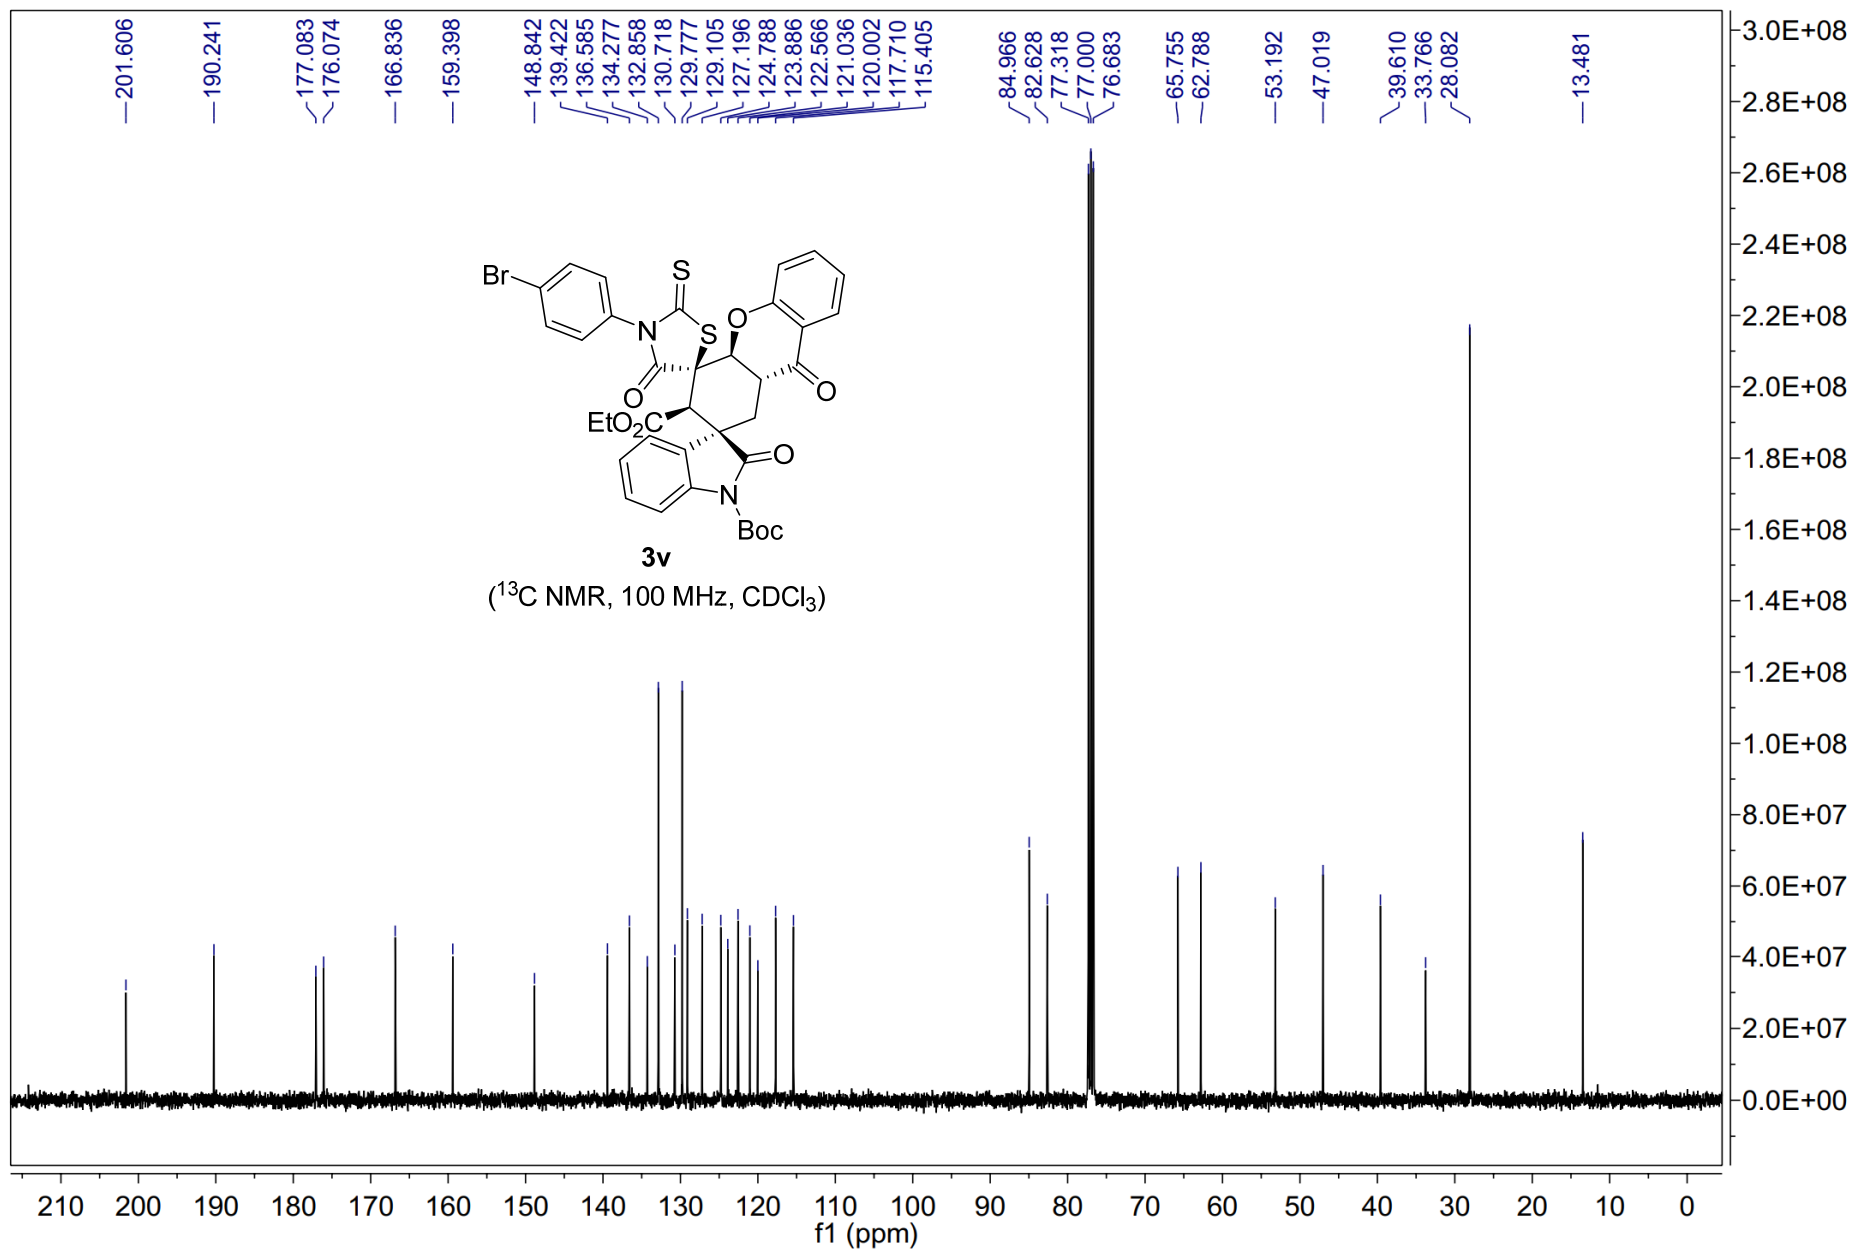

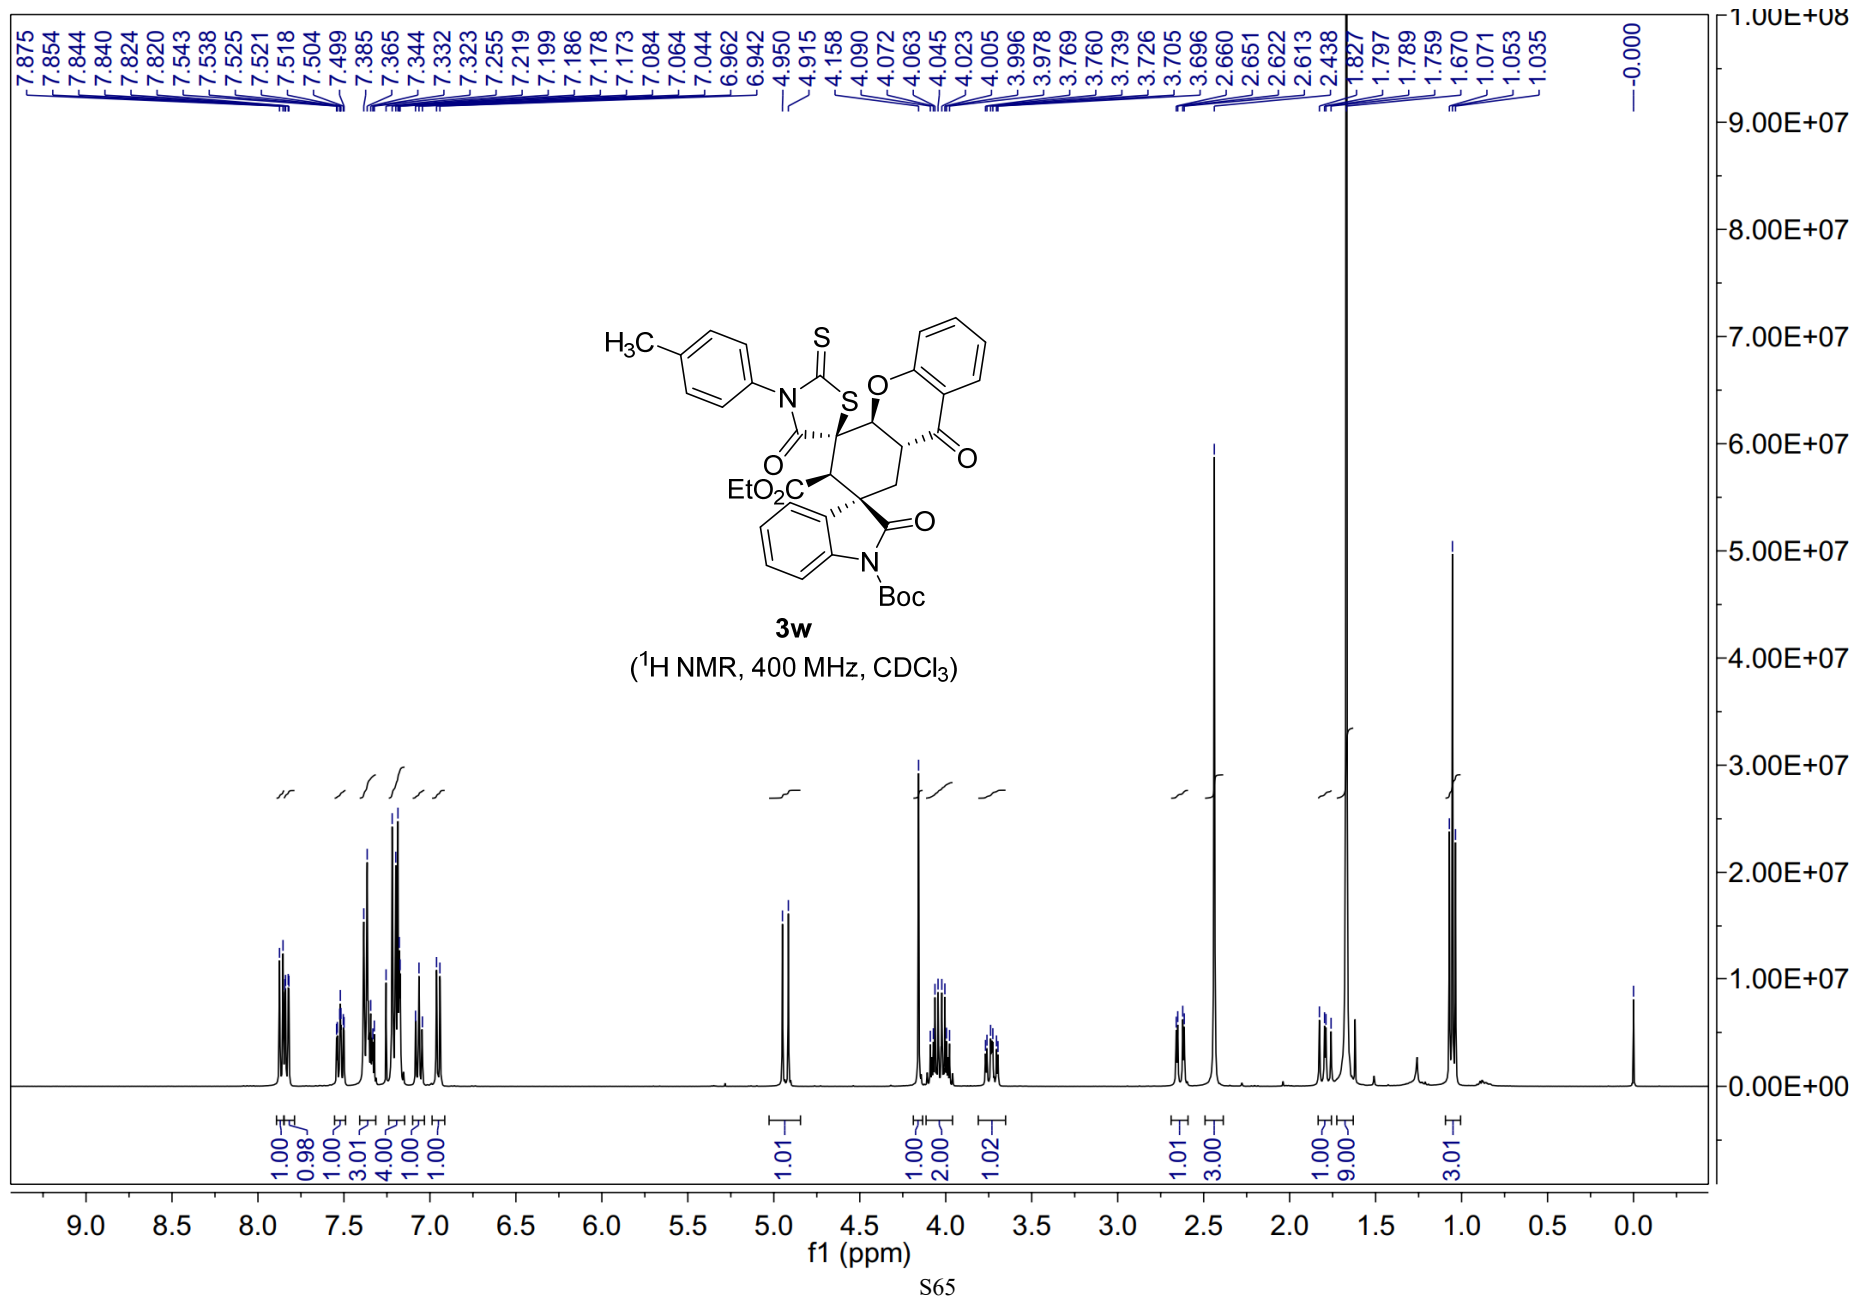

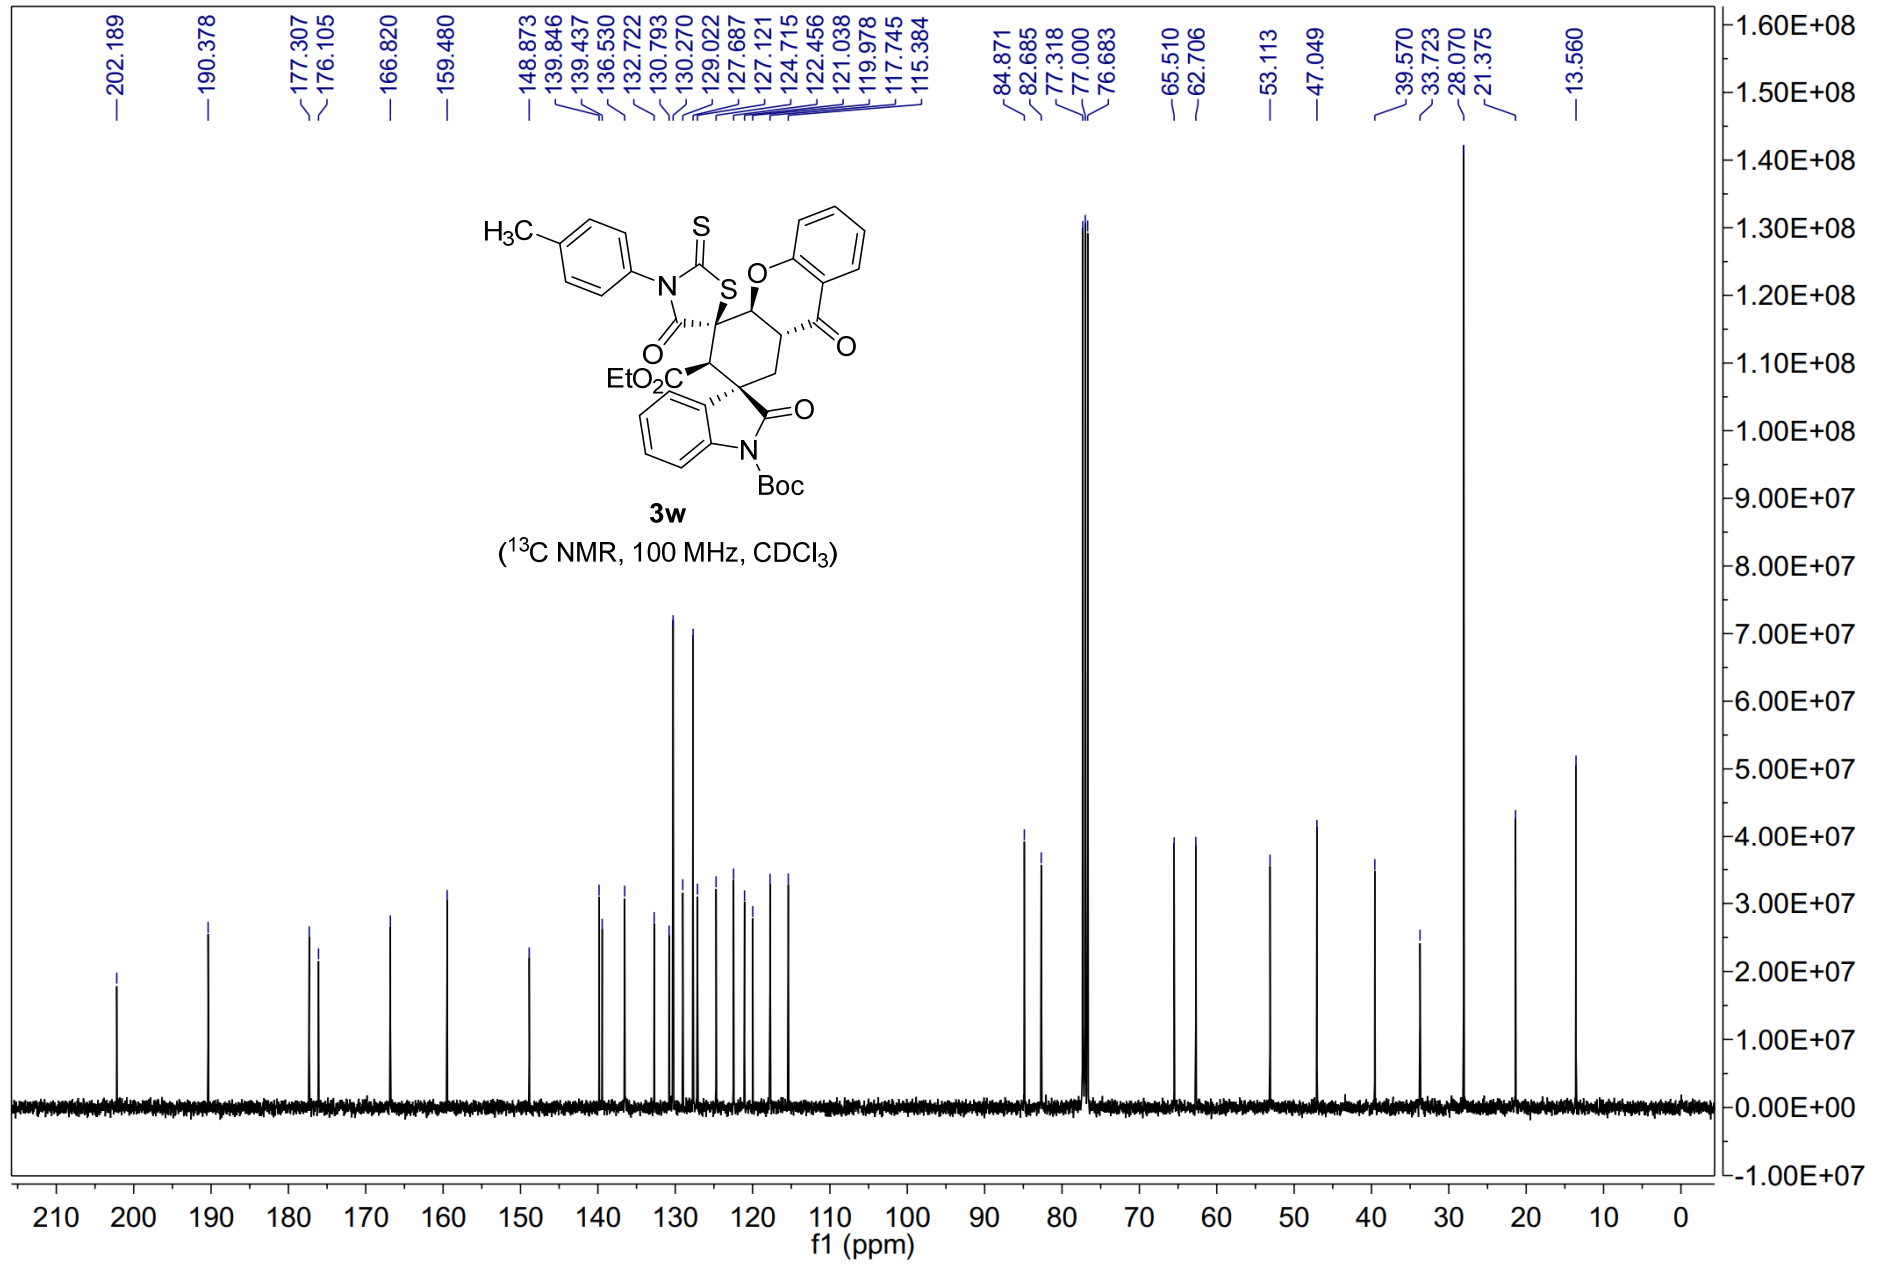

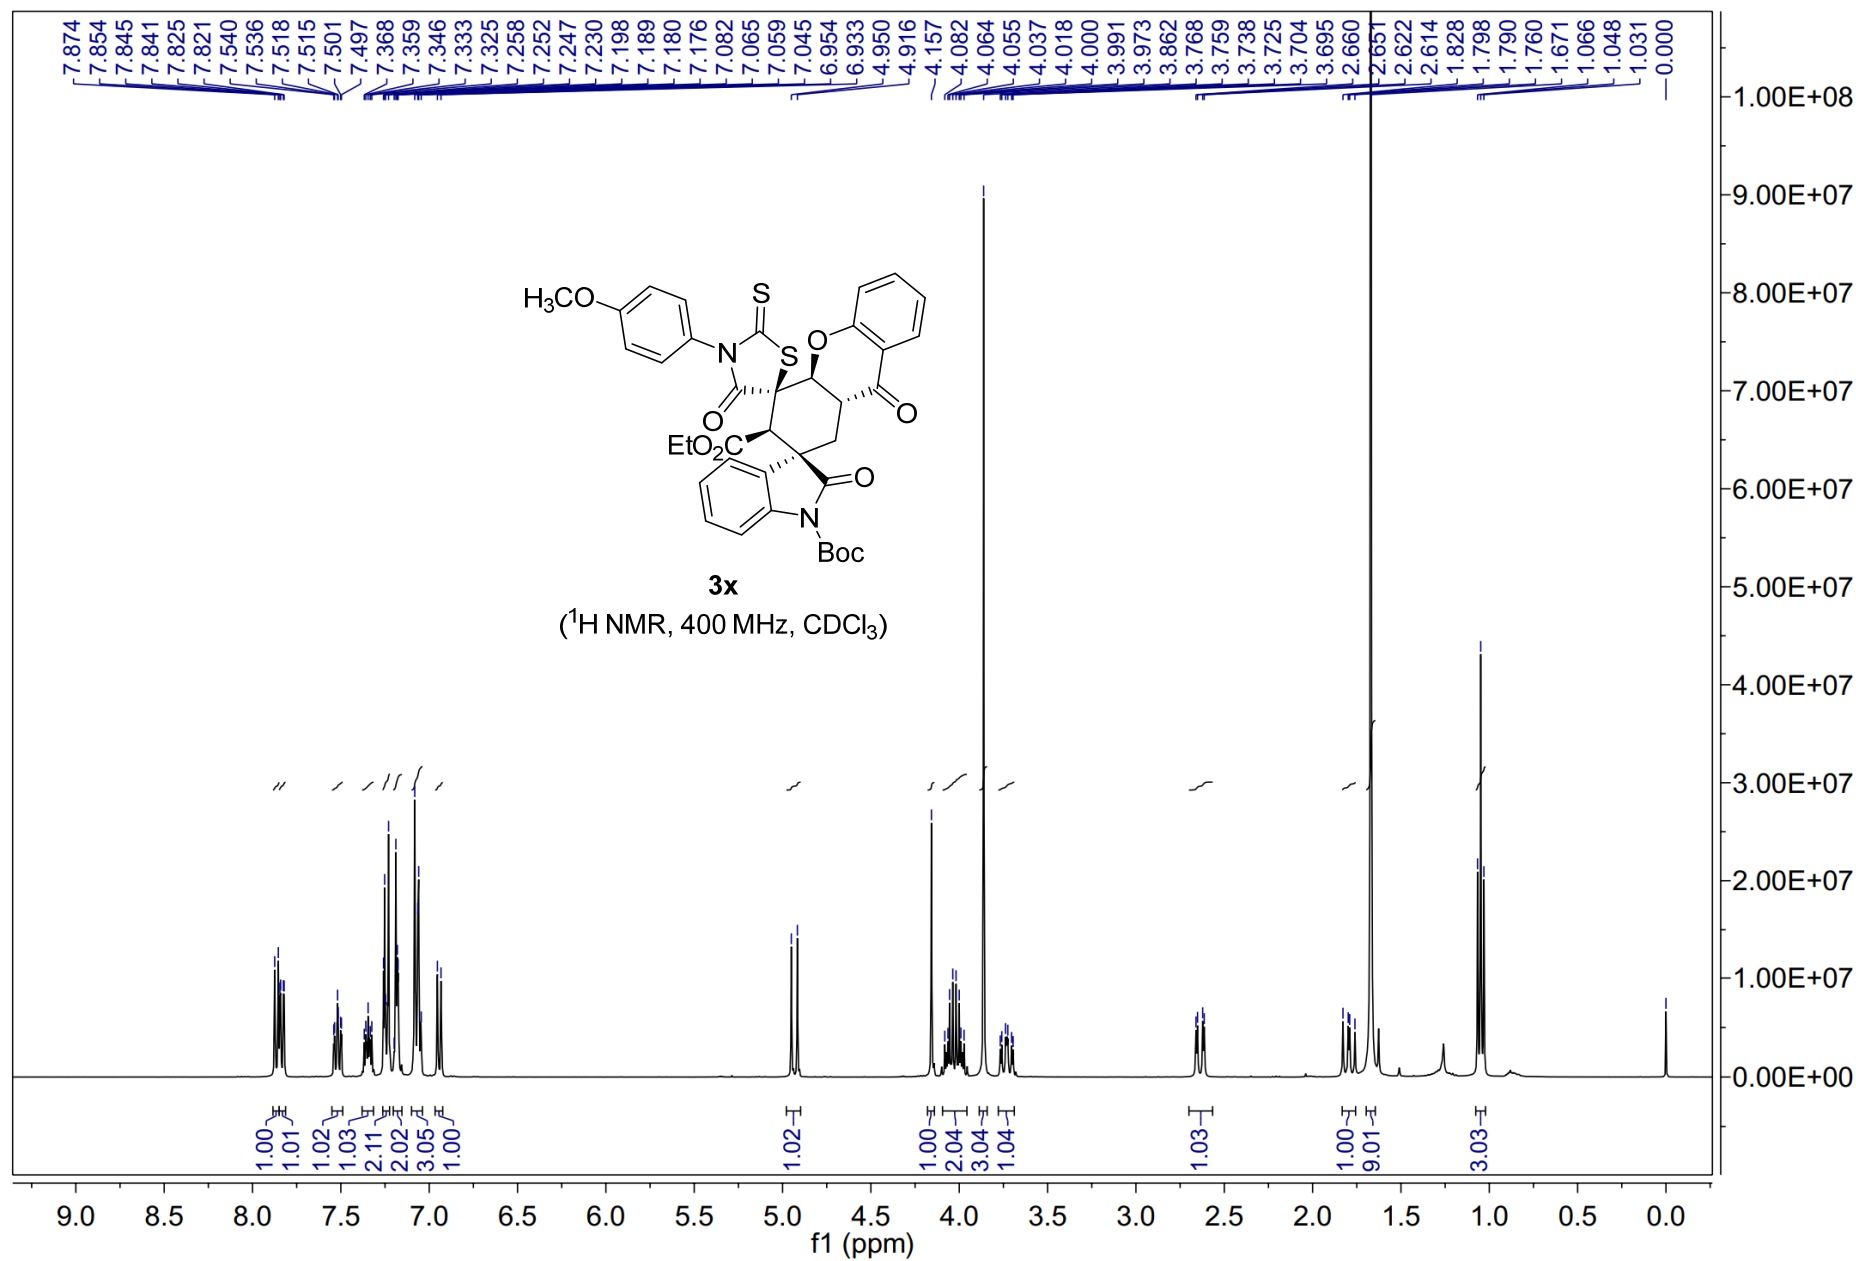

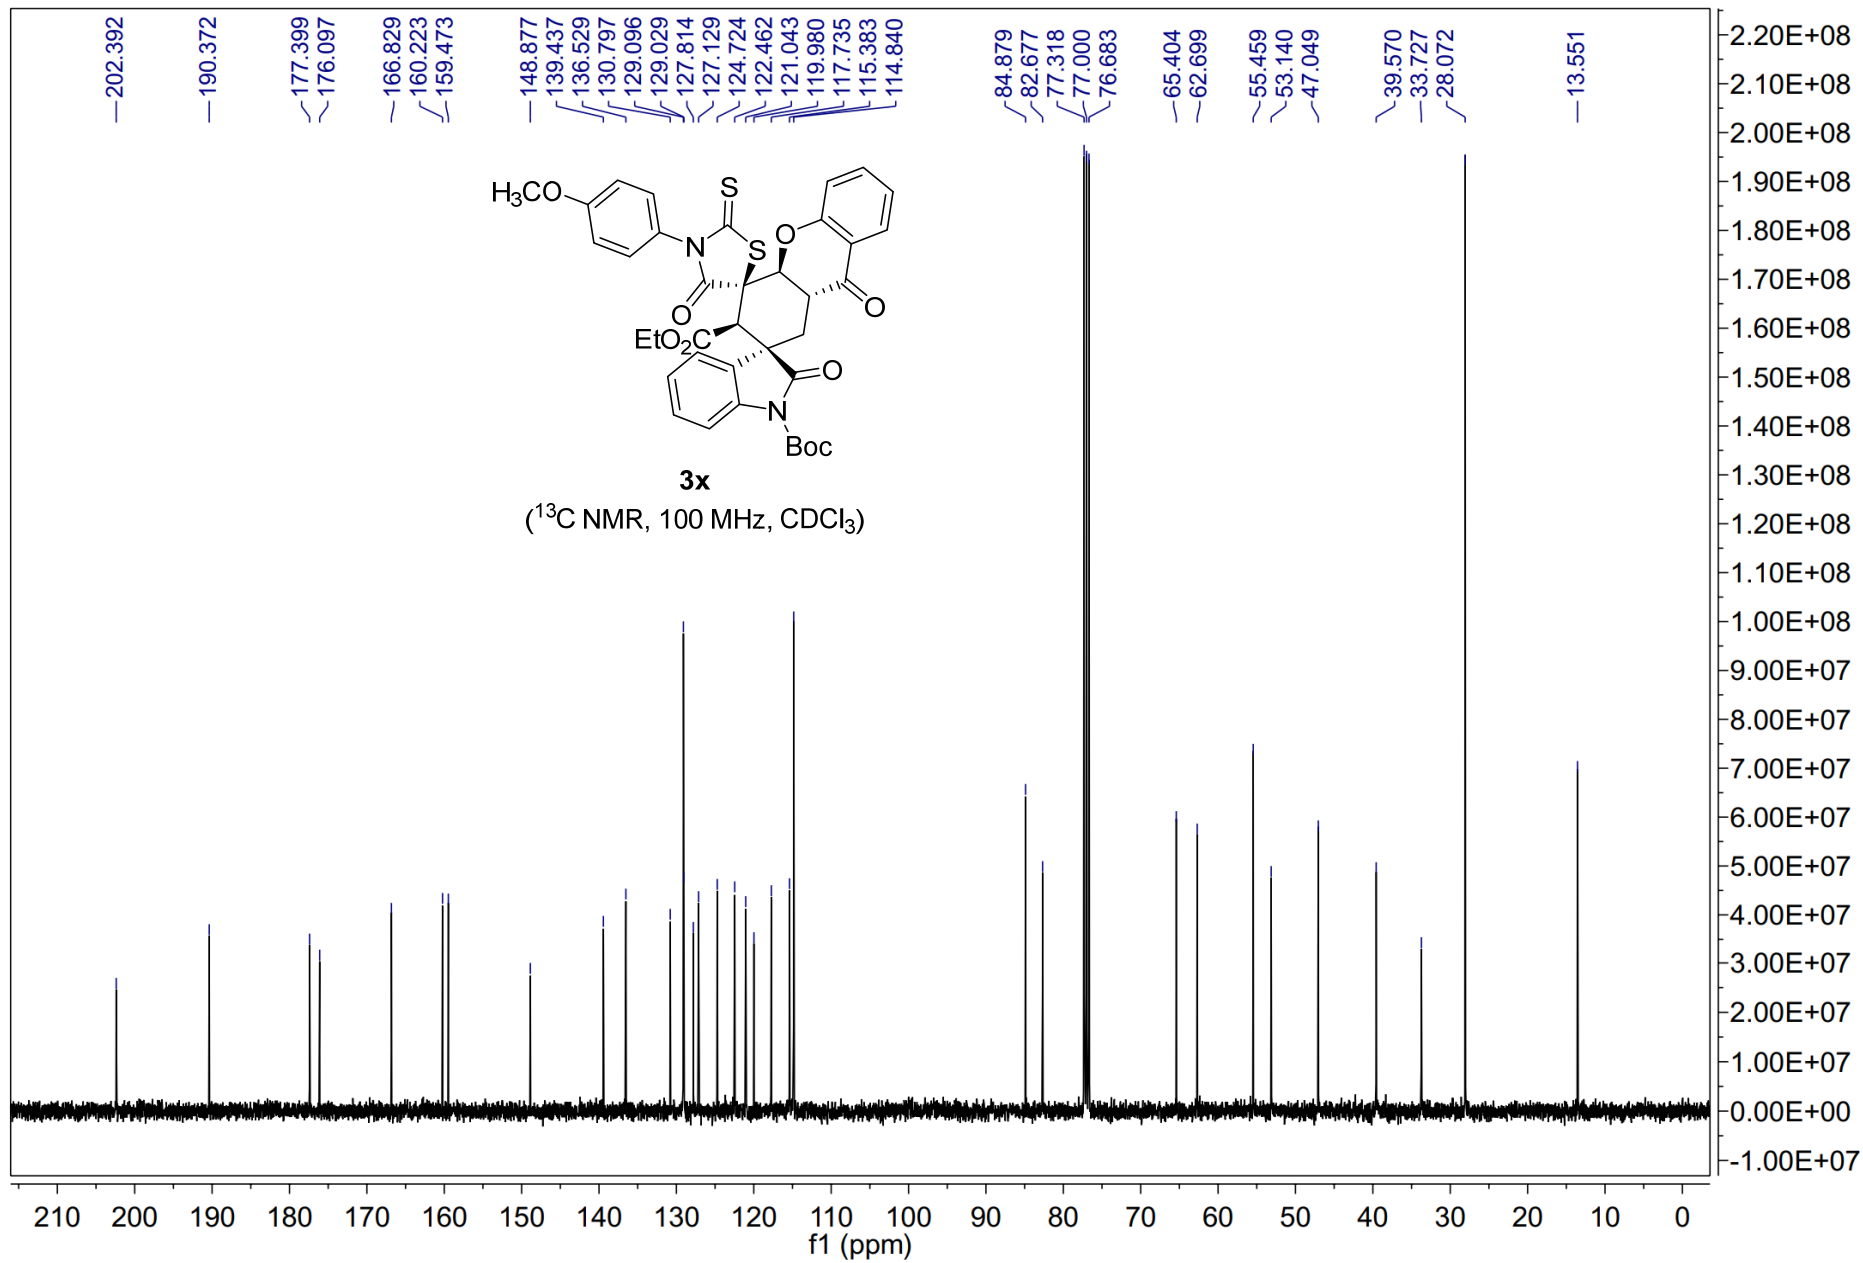

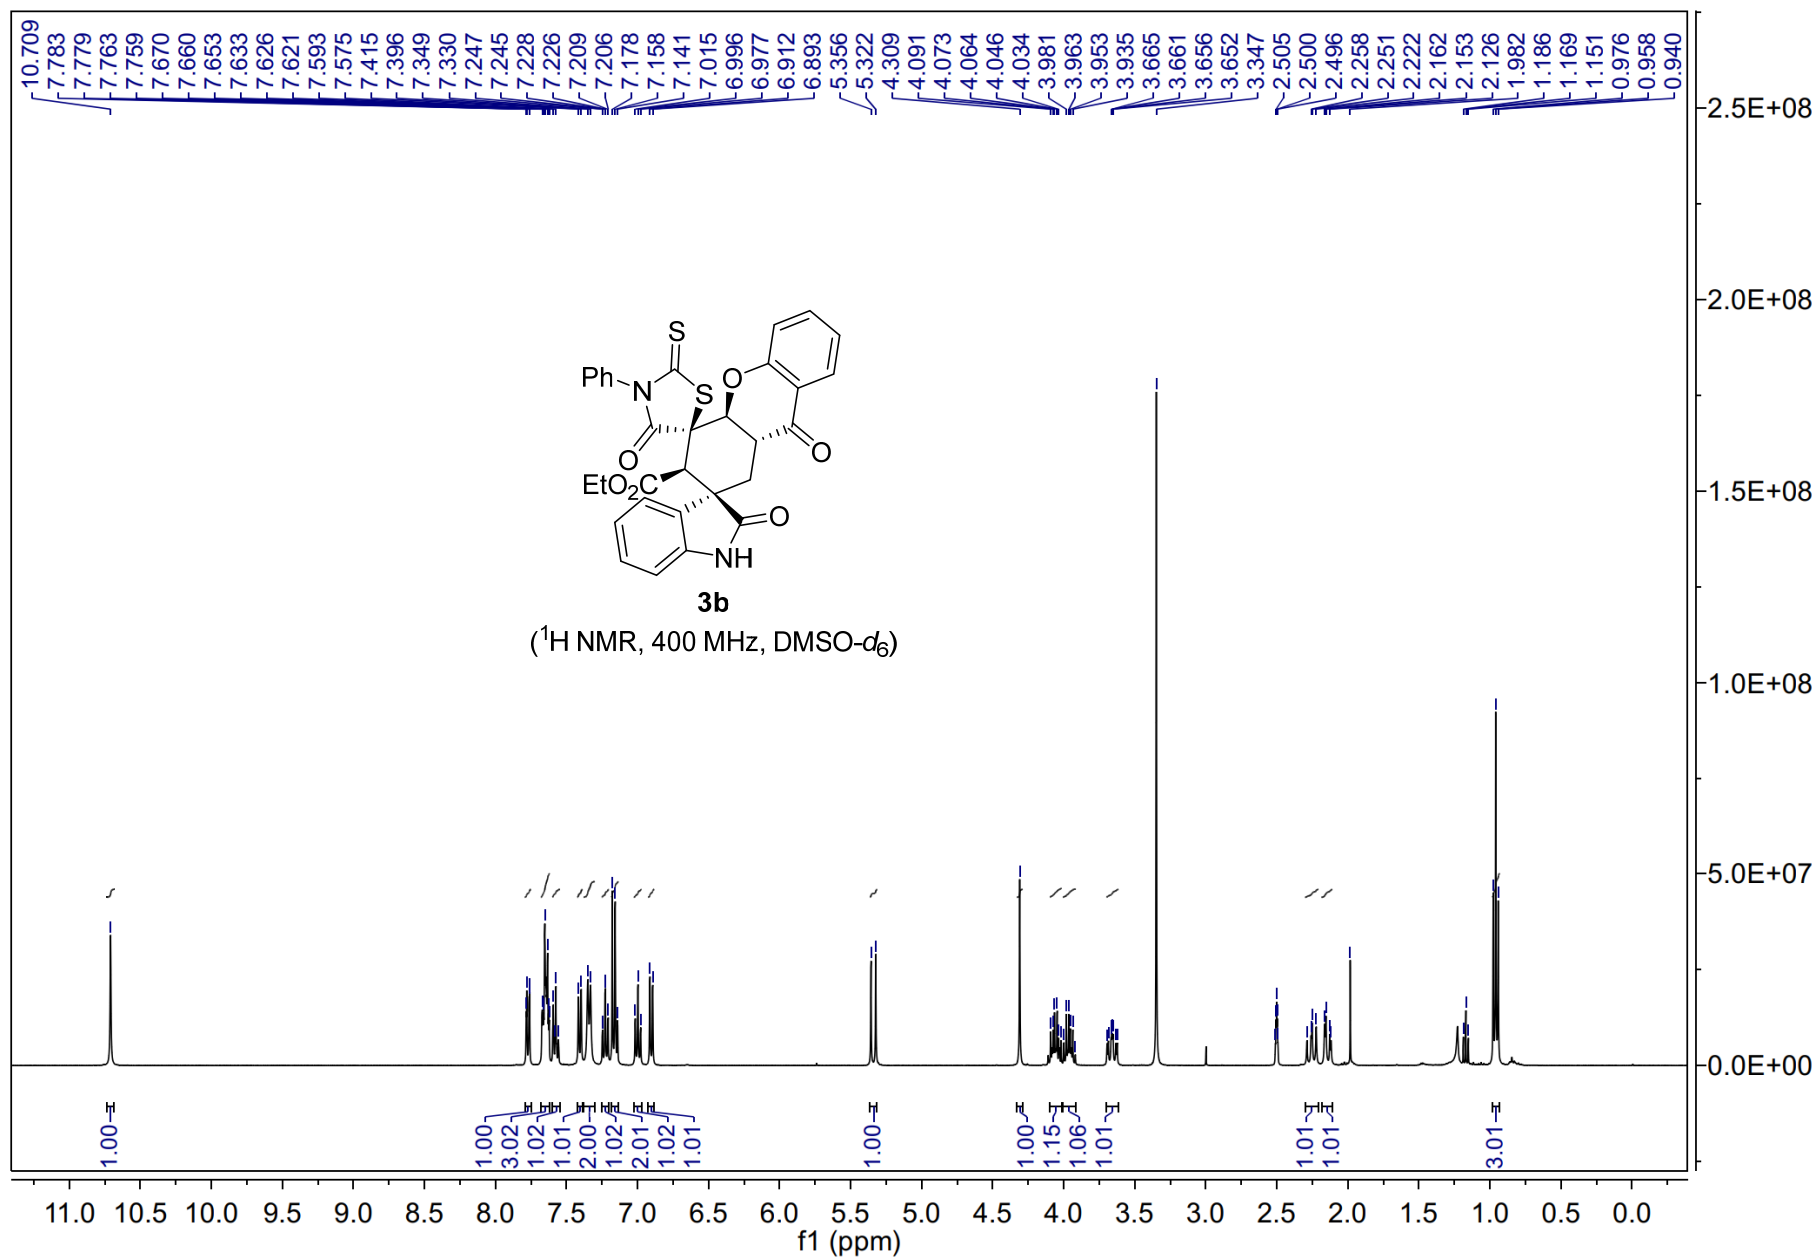

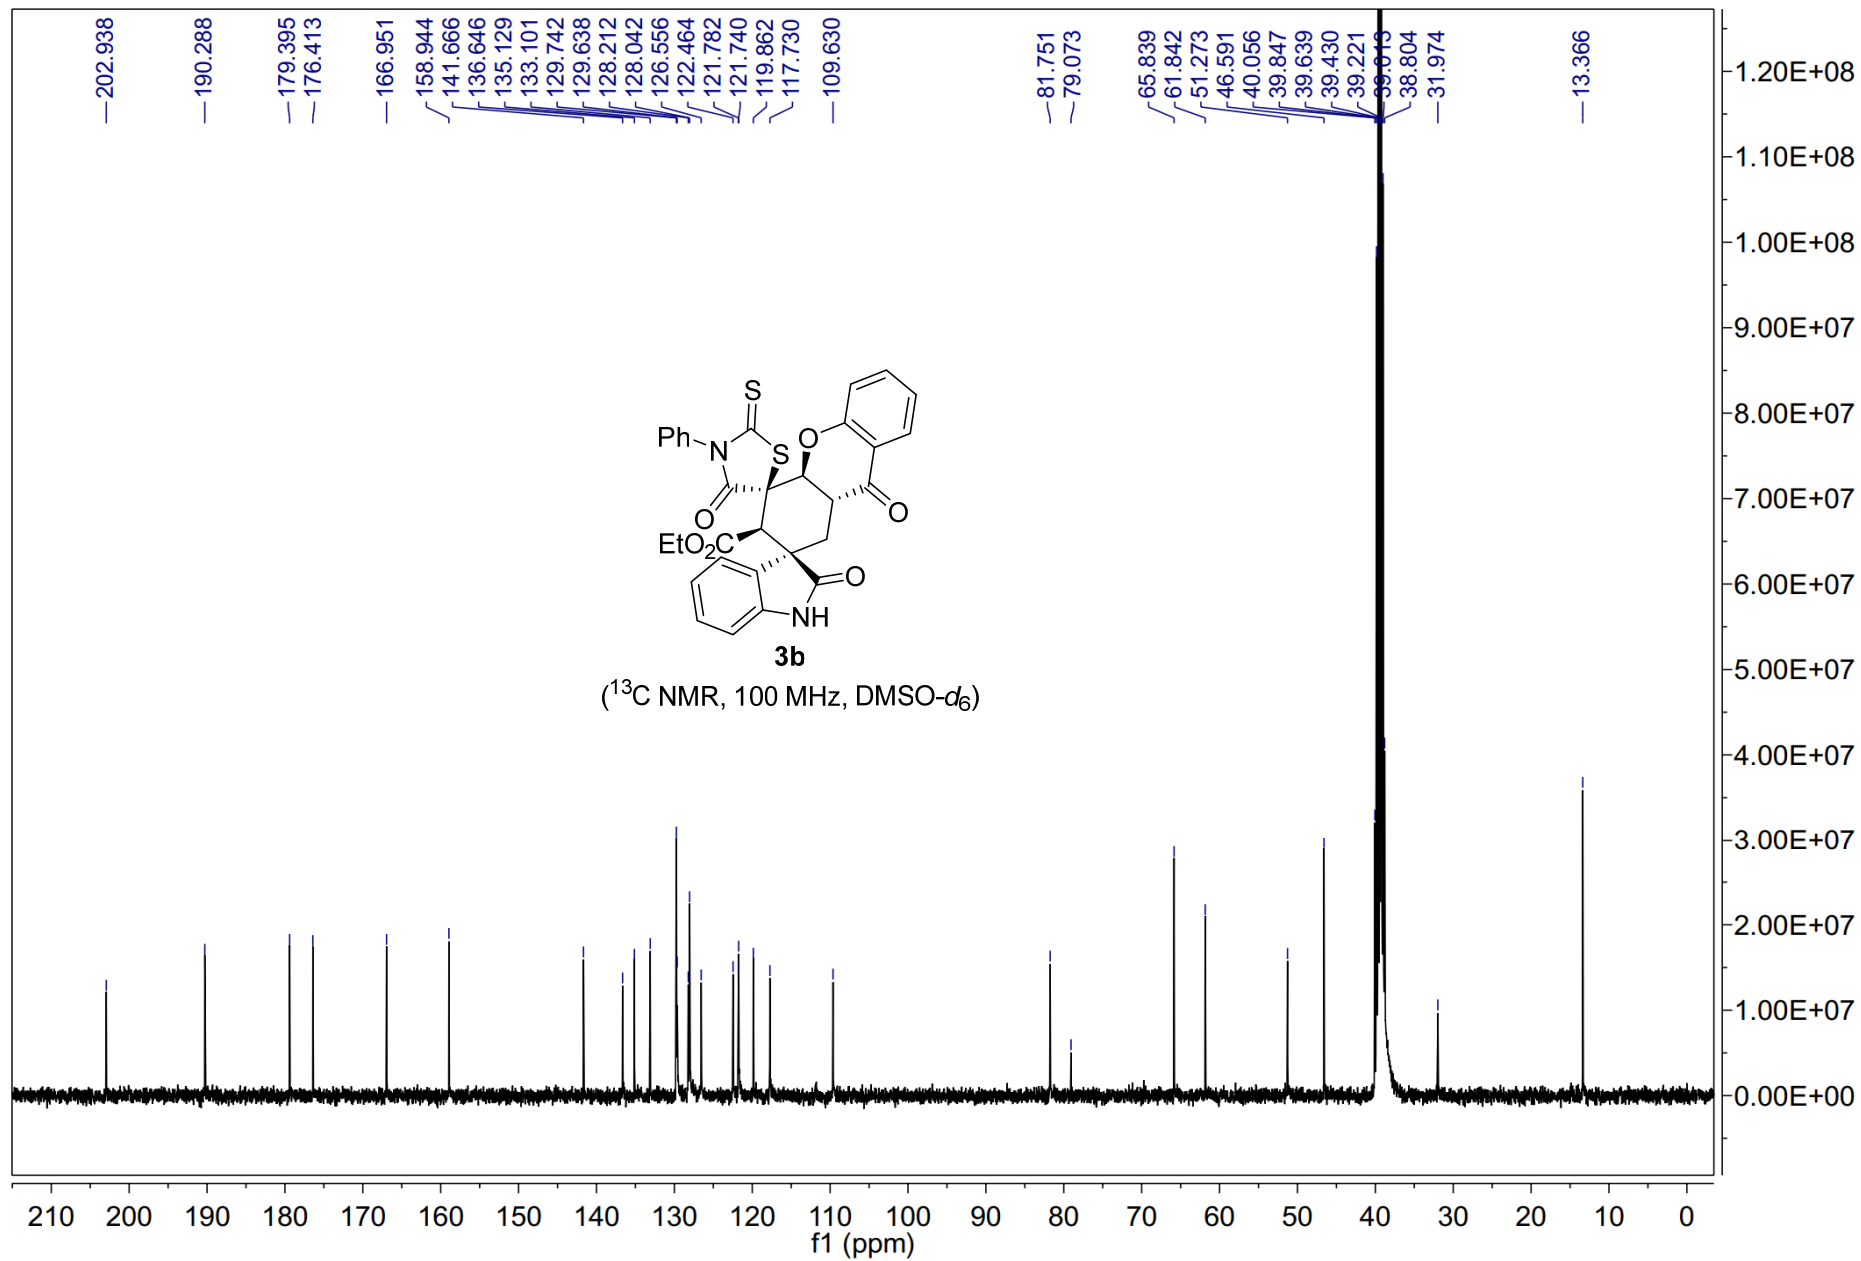

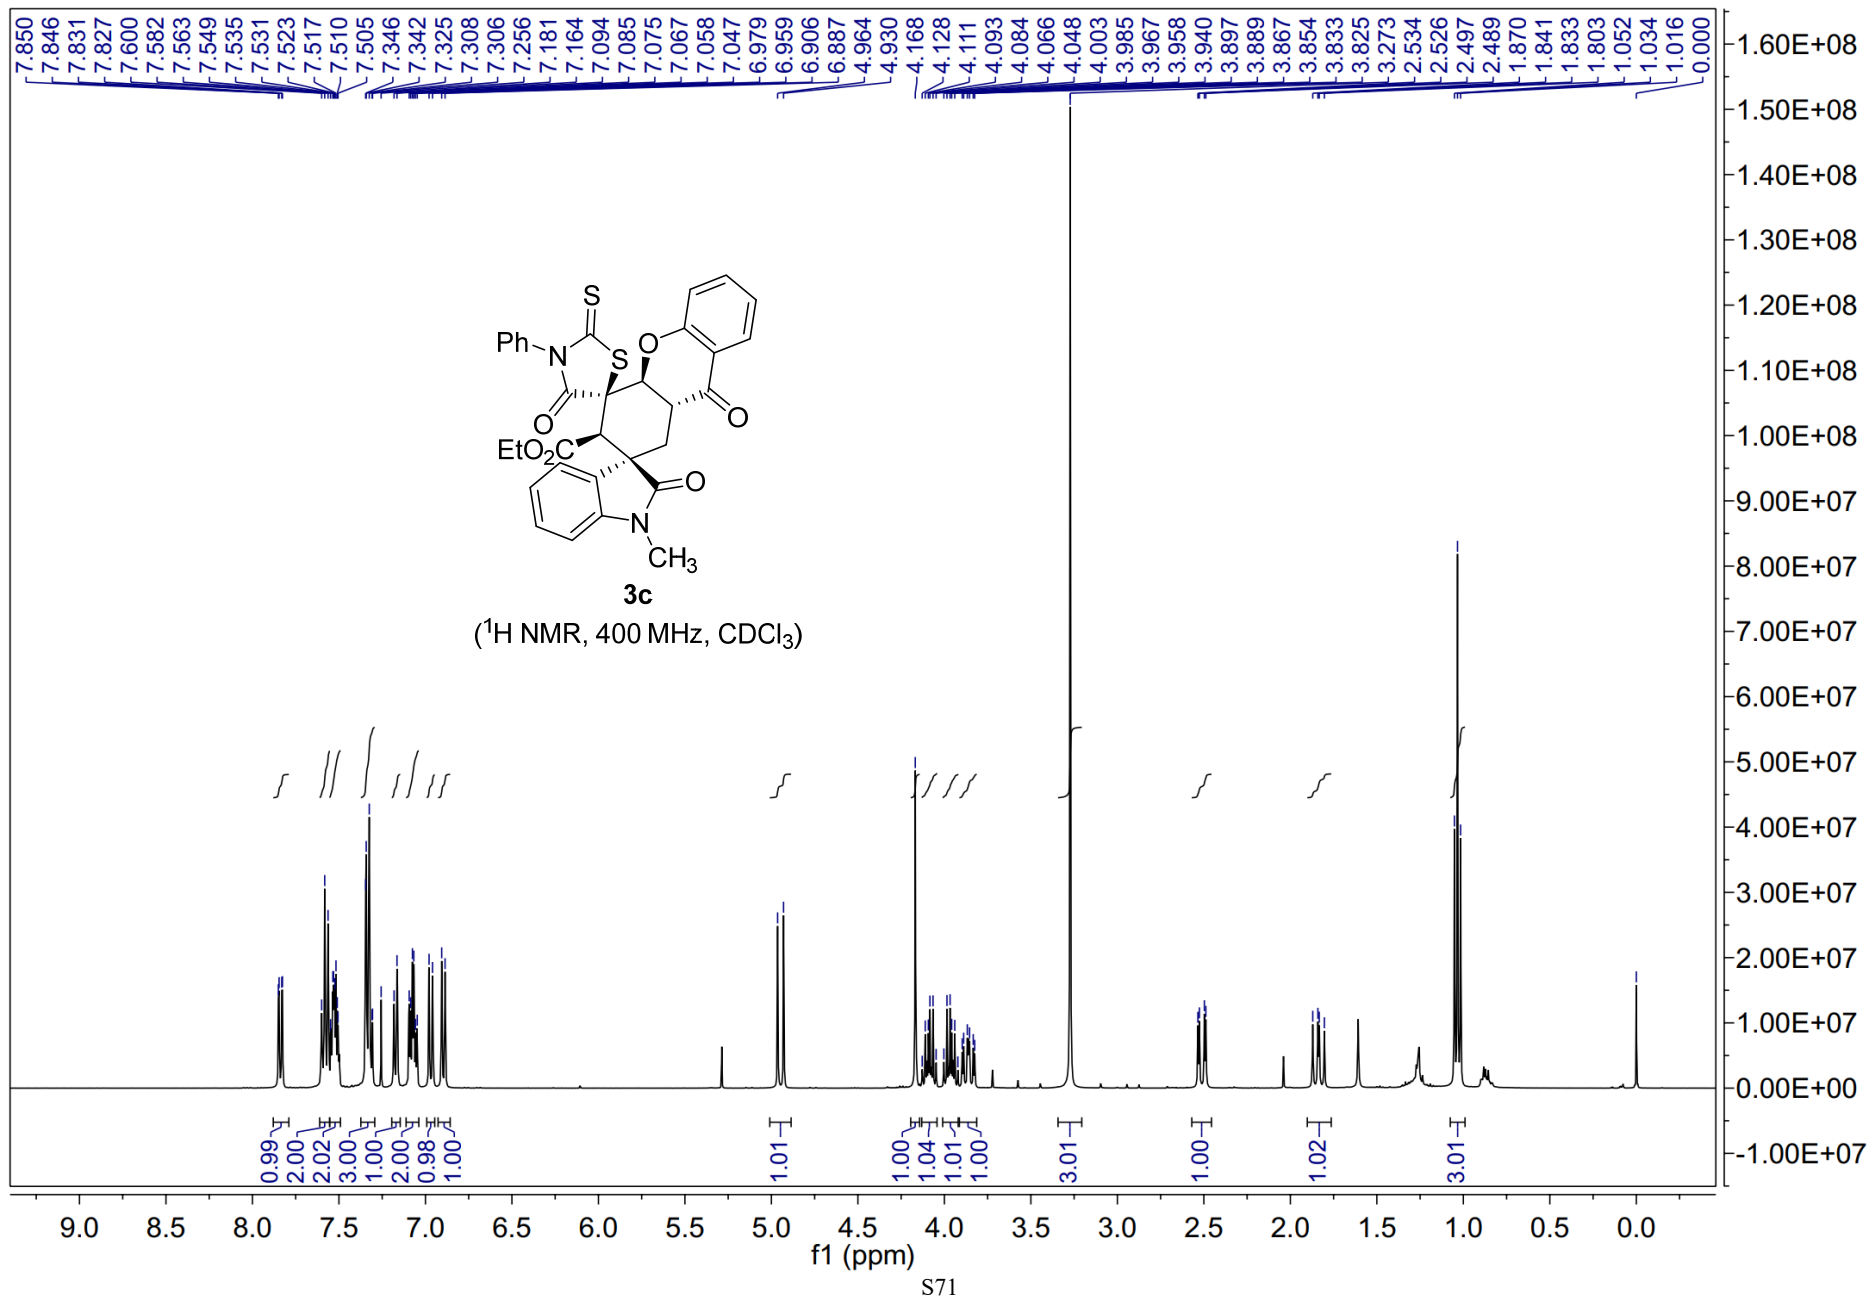



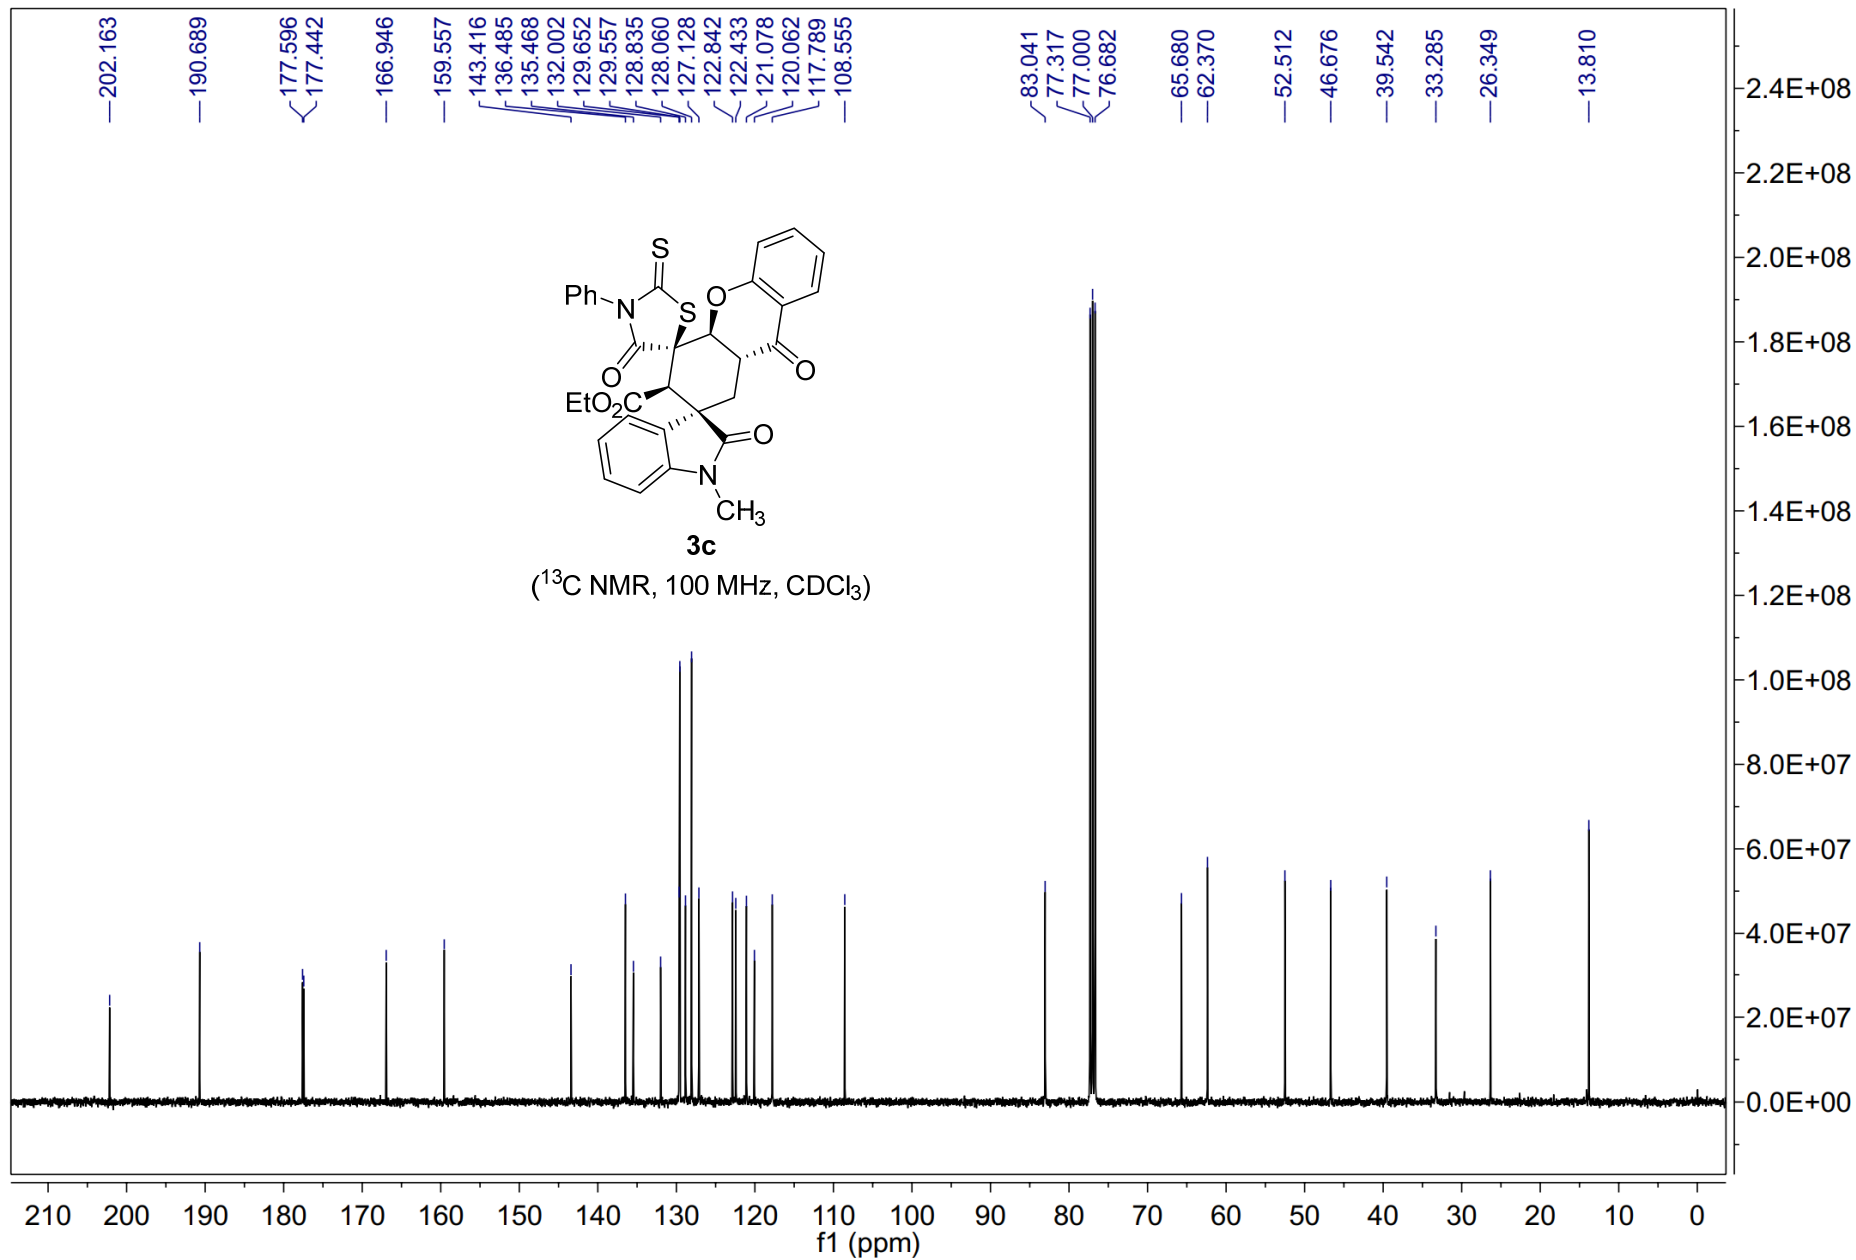

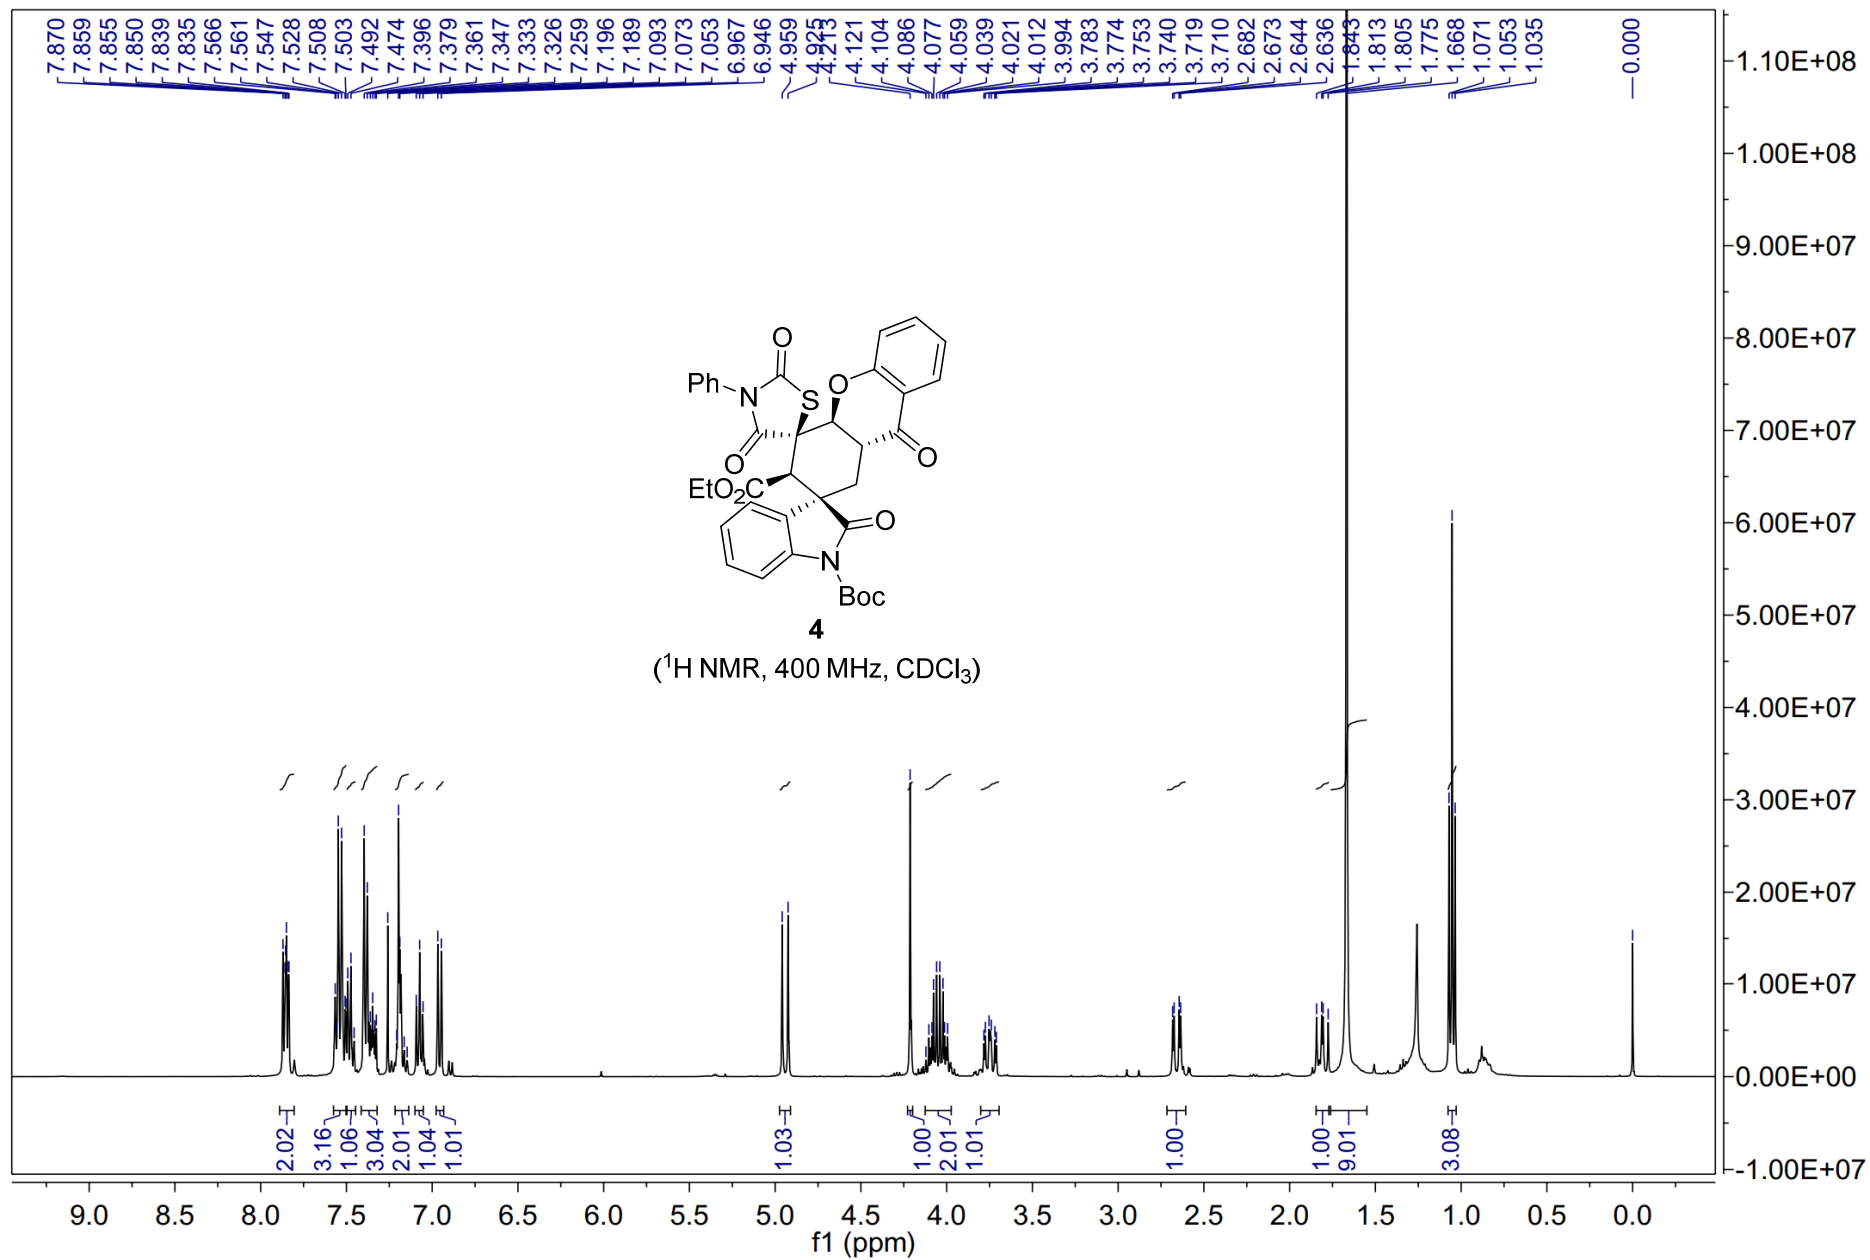

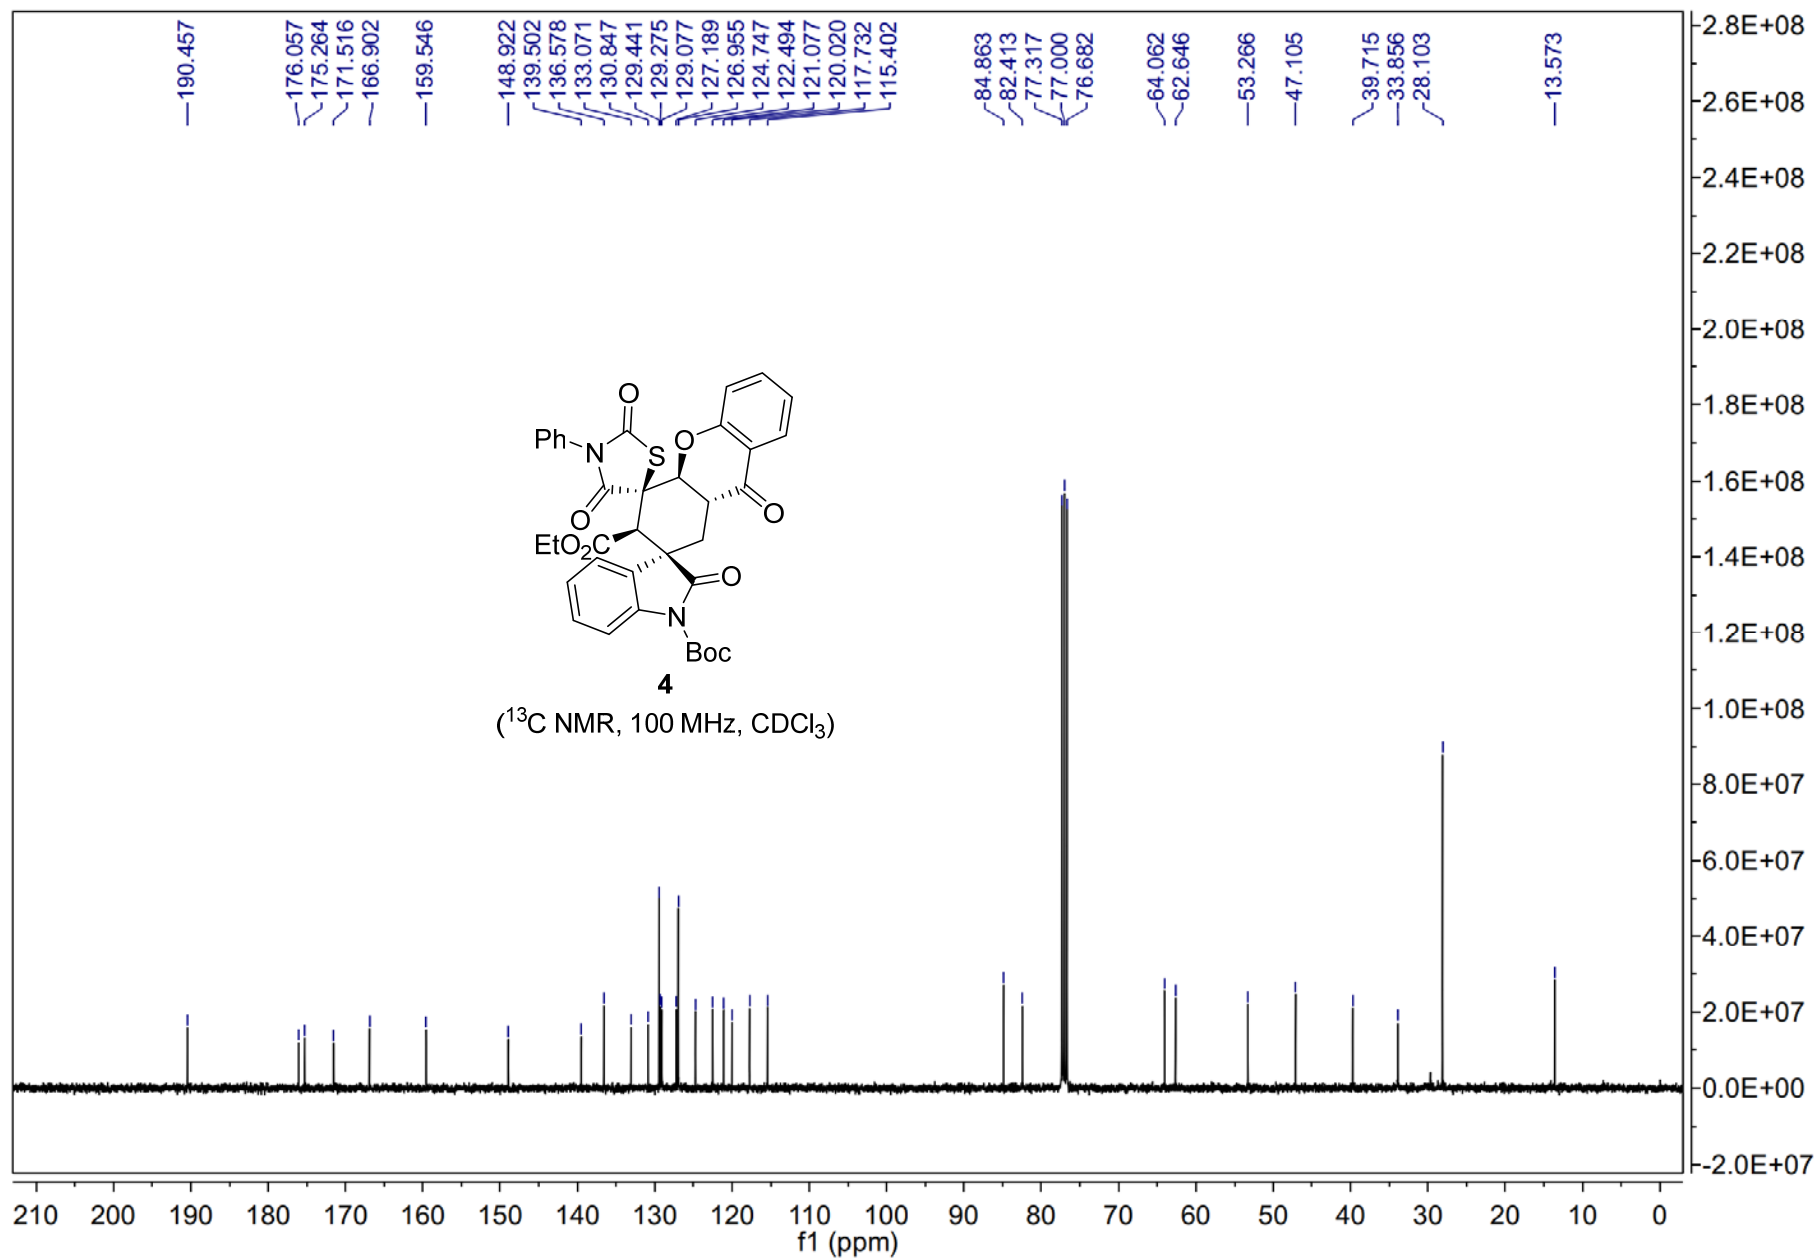

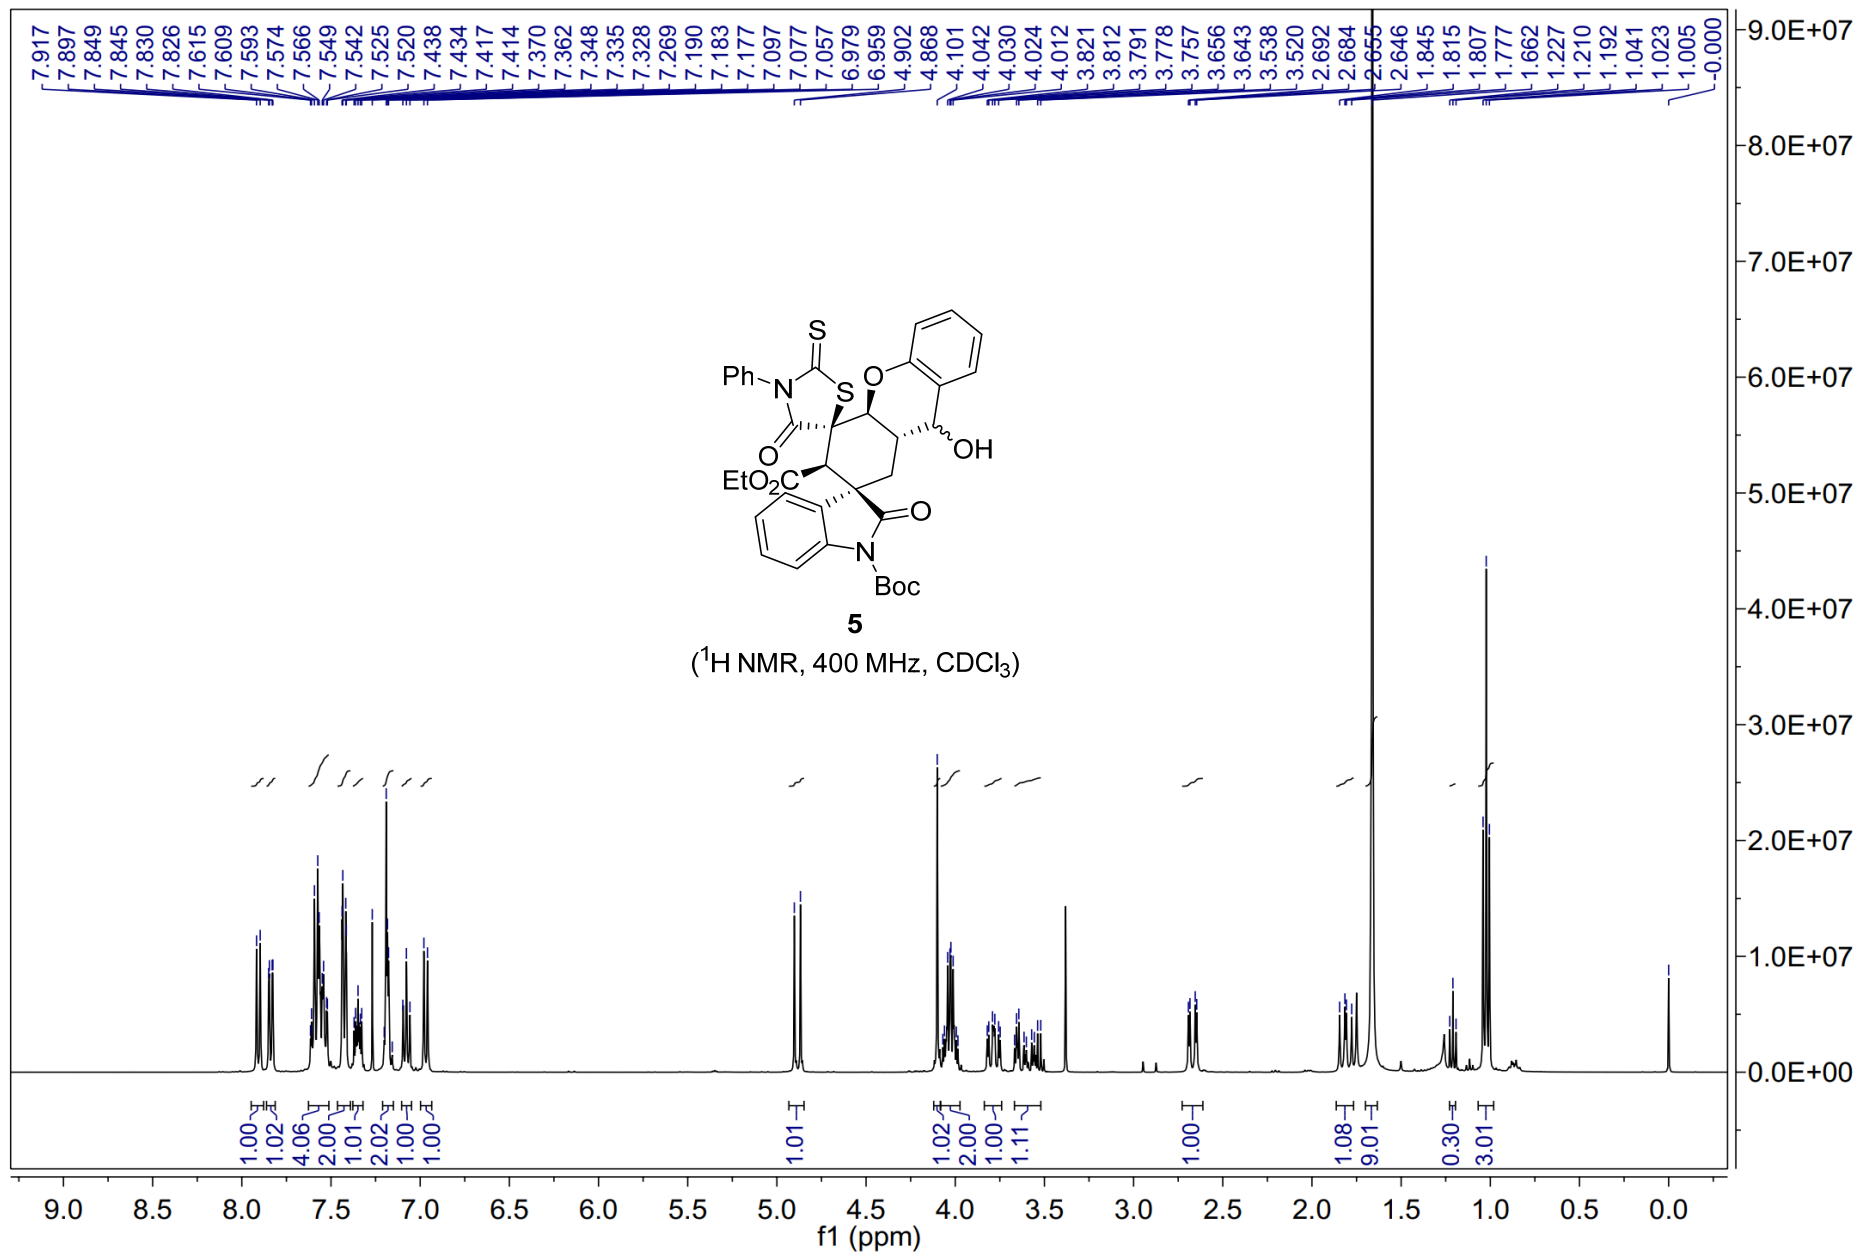

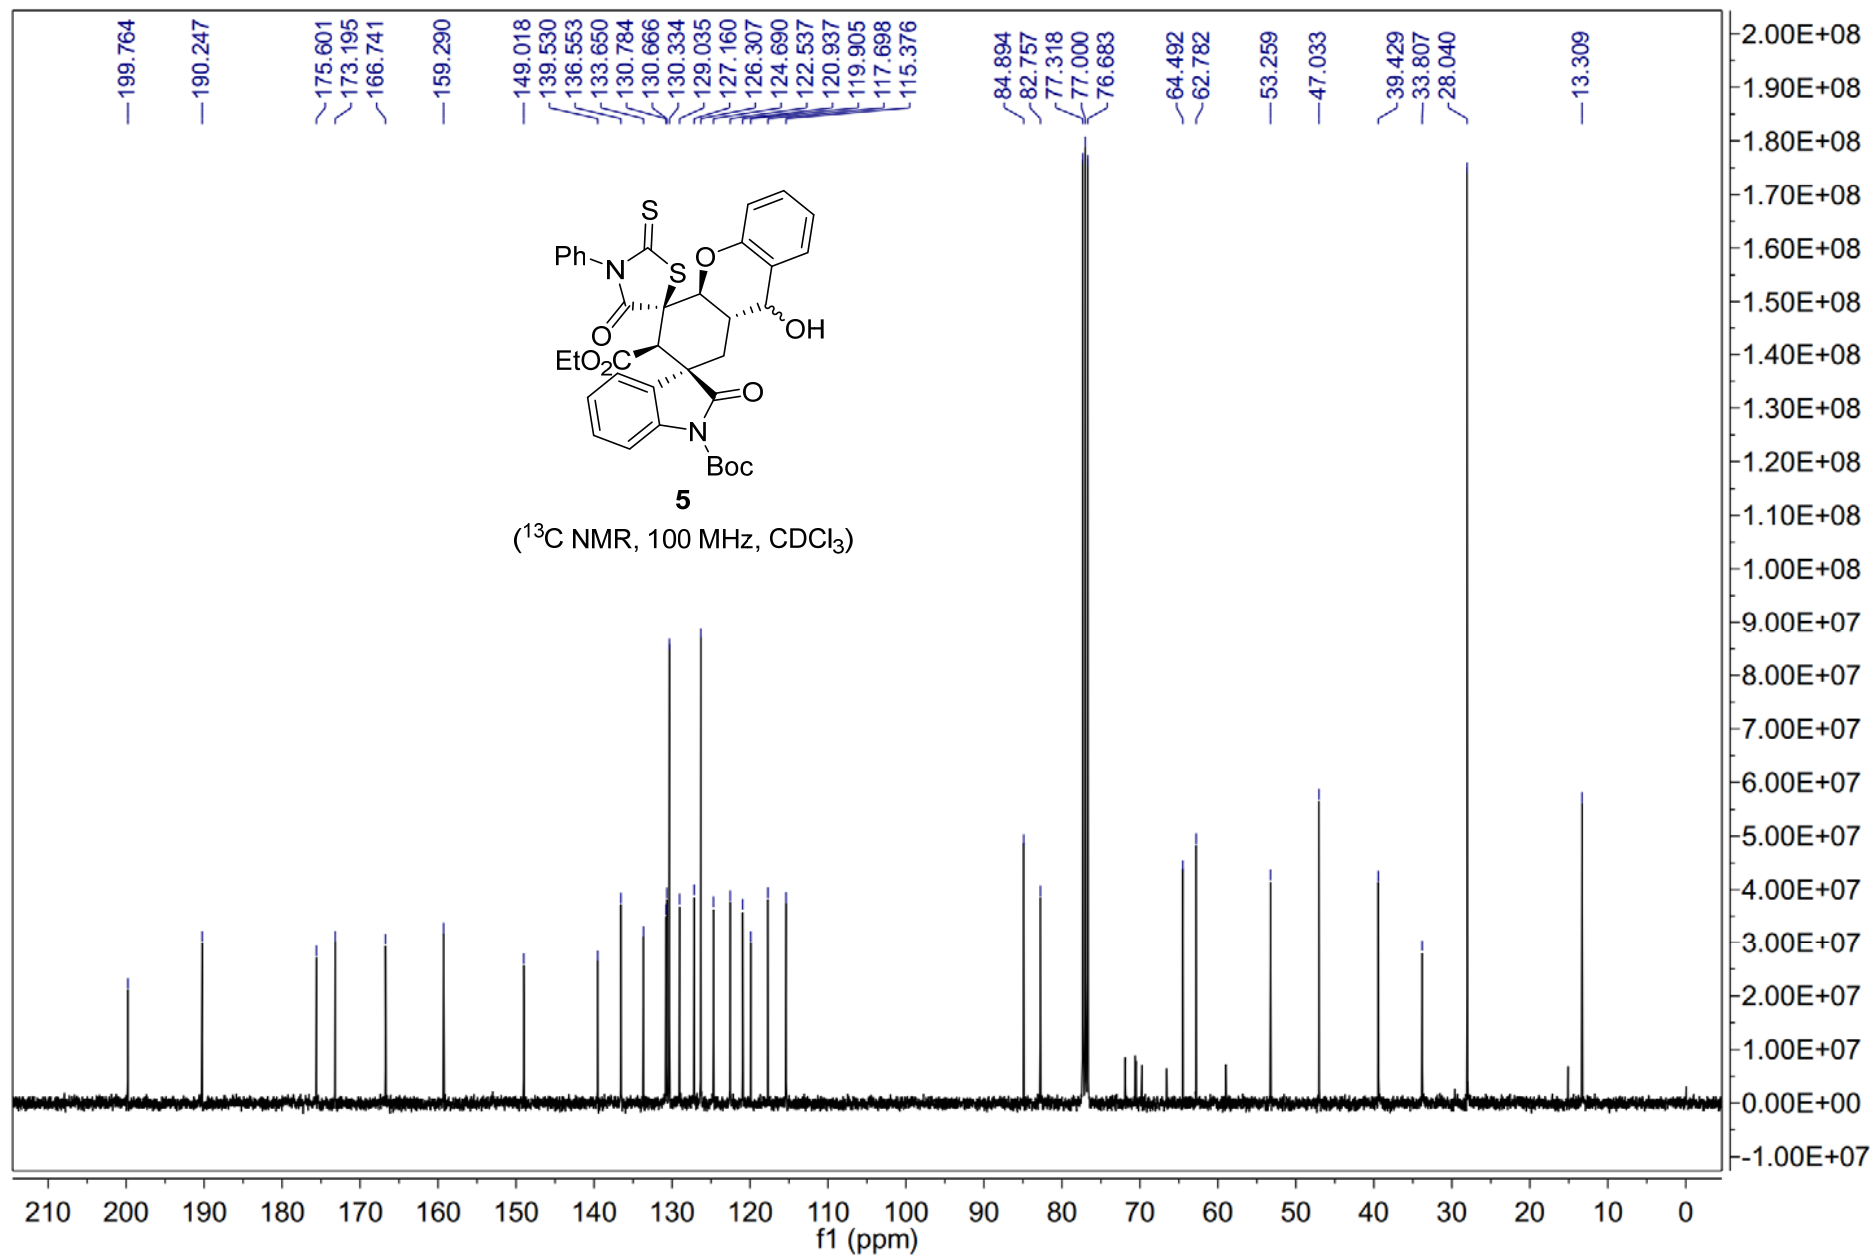

## 11. Copies of HPLC chromatograms

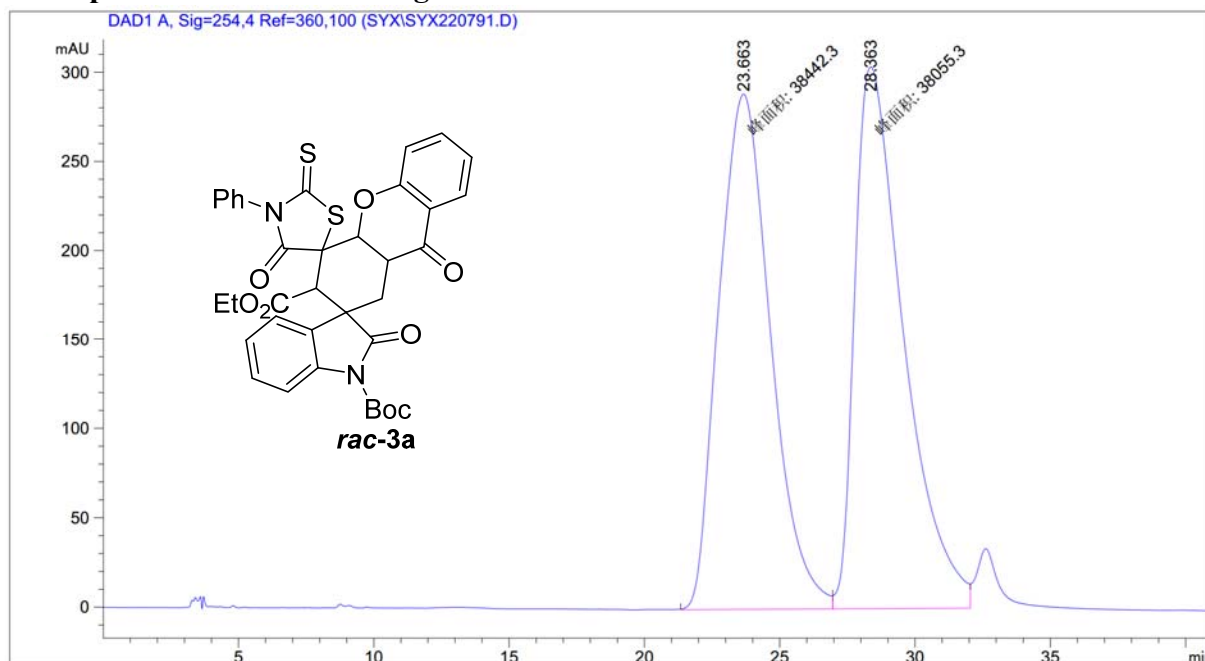

| Peak # | RetTime [min] | Type | Width [min] | Area [mAU*s] | Height [mAU] | Area %  |
|--------|---------------|------|-------------|--------------|--------------|---------|
| 1      | 23.663        | MF   | 2.2169      | 3.84423e4    | 289.01483    | 50.2530 |
| 2      | 28.363        | MF   | 2.0873      | 3.80553e4    | 303.87057    | 49.7470 |

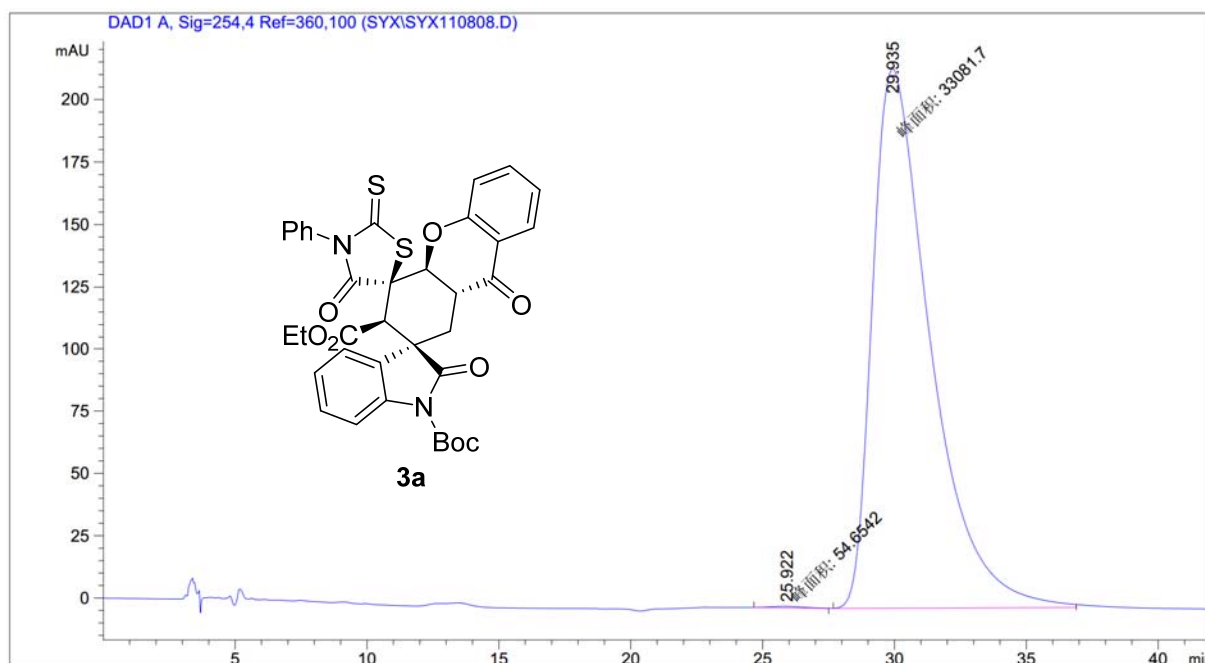

| Peak # | RetTime [min] | Type | Width [min] | Area [mAU*s] | Height [mAU] | Area %  |
|--------|---------------|------|-------------|--------------|--------------|---------|
| 1      | 25.922        | MM   | 1.5565      | 54.65420     | 5.85229e-1   | 0.1649  |
| 2      | 29.935        | MF   | 2.5480      | 3.30817e4    | 216.39006    | 99.8351 |

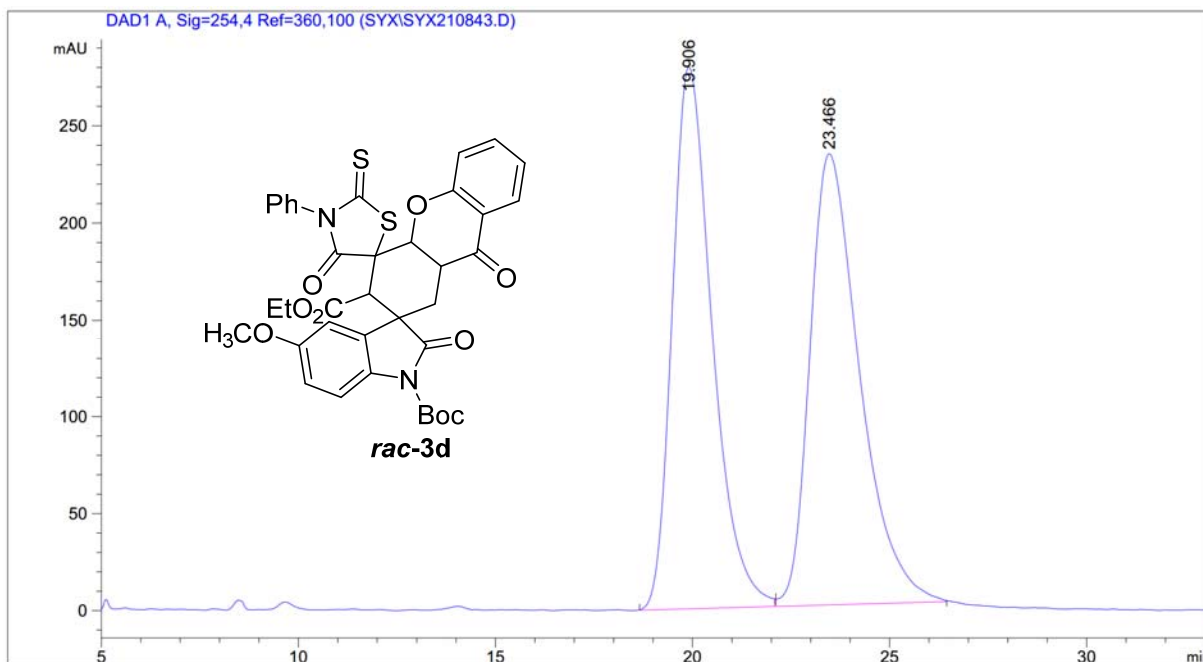

| Peak # | RetTime [min] | Type | Width [min] | Area [mAU*s] | Height [mAU] | Area %  |
|--------|---------------|------|-------------|--------------|--------------|---------|
| 1      | 19.906        | BB   | 1.0698      | 1.96359e4    | 279.45636    | 49.0242 |
| 2      | 23.466        | BB   | 1.2716      | 2.04176e4    | 232.70374    | 50.9758 |

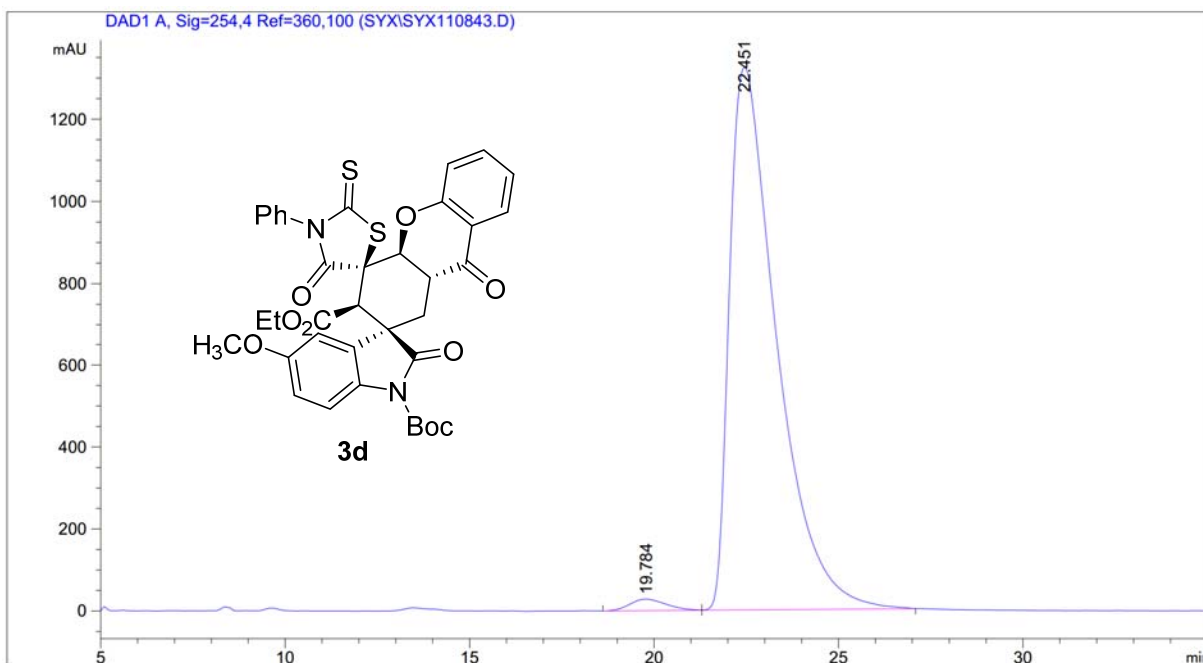

| Peak # | RetTime [min] | Type | Width [min] | Area [mAU*s] | Height [mAU] | Area %  |
|--------|---------------|------|-------------|--------------|--------------|---------|
| 1      | 19.784        | BV   | 0.8161      | 1910.21118   | 28.06273     | 1.5968  |
| 2      | 22.451        | VB   | 1.2259      | 1.17721e5    | 1323.27209   | 98.4032 |

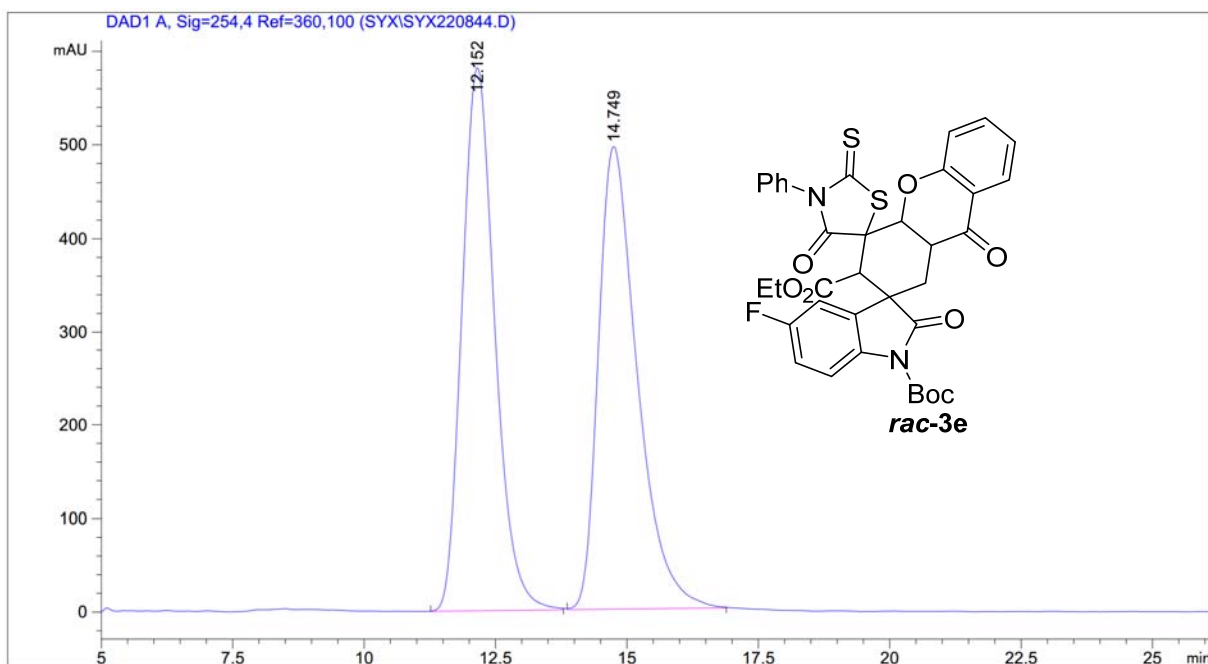

| Peak # | RetTime [min] | Type | Width [min] | Area [mAU*s] | Height [mAU] | Area %  |
|--------|---------------|------|-------------|--------------|--------------|---------|
| 1      | 12.152        | BB   | 0.6696      | 2.51759e4    | 580.88934    | 49.7418 |
| 2      | 14.749        | BB   | 0.7736      | 2.54372e4    | 494.94943    | 50.2582 |

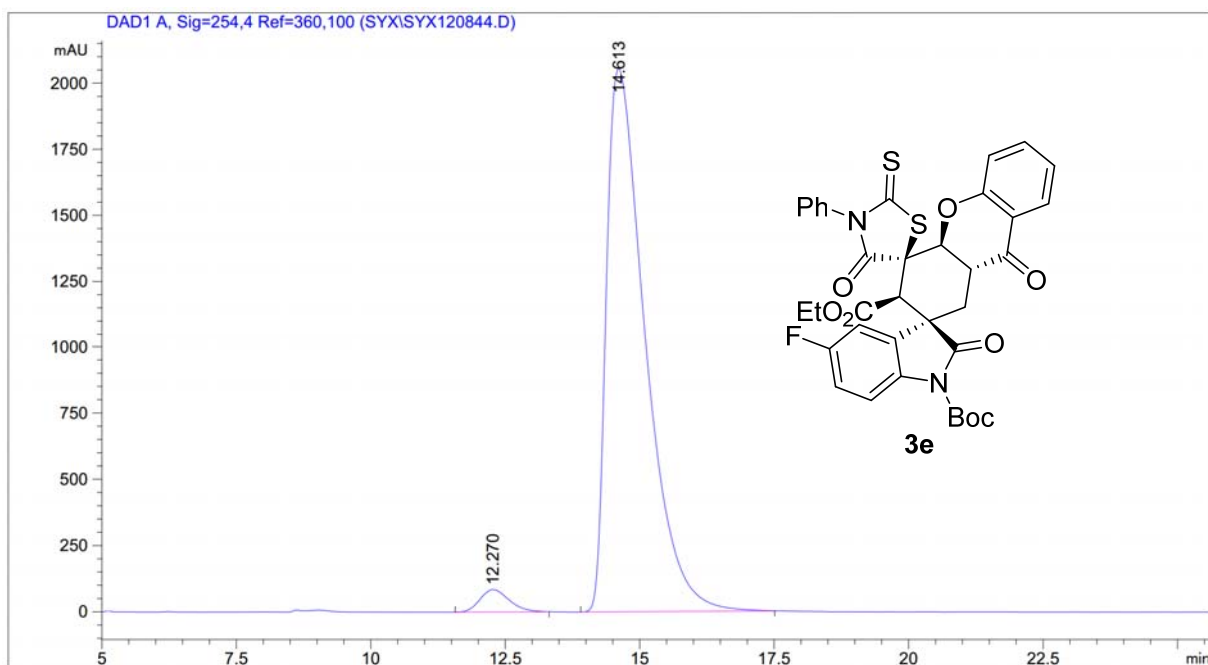

| Peak # | RetTime [min] | Type | Width [min] | Area [mAU*s] | Height [mAU] | Area %  |
|--------|---------------|------|-------------|--------------|--------------|---------|
| 1      | 12.270        | BB   | 0.5801      | 3179.92334   | 84.29928     | 3.0035  |
| 2      | 14.613        | BB   | 0.6606      | 1.02696e5    | 2056.56860   | 96.9965 |



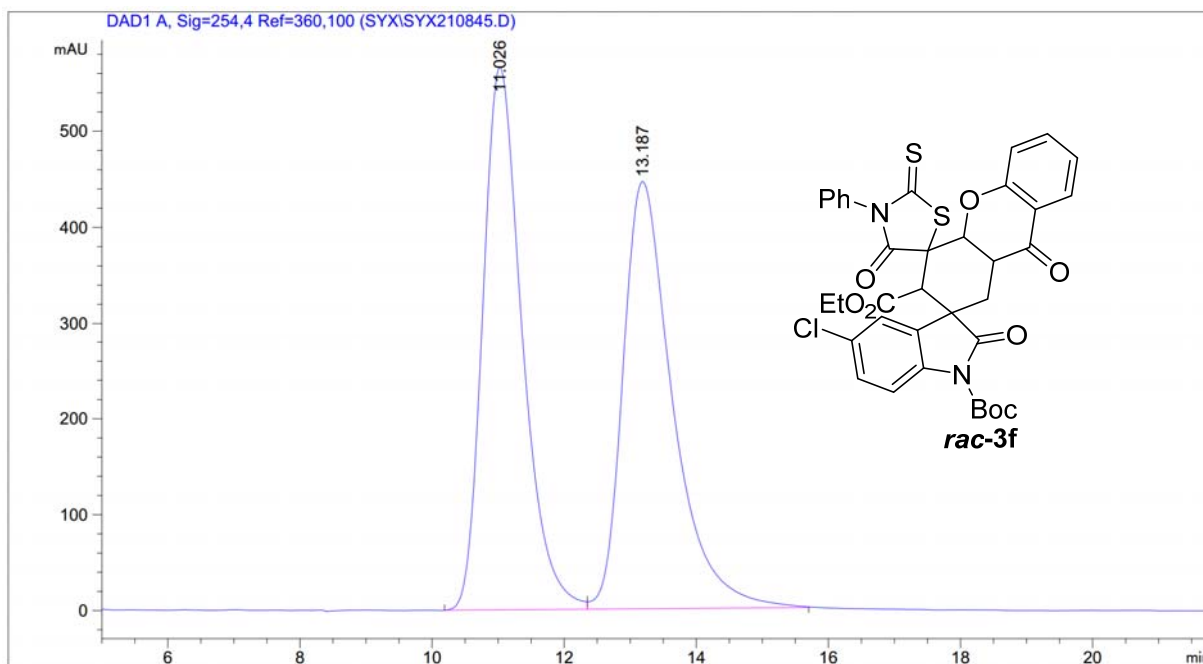

| Peak # | RetTime [min] | Type | Width [min] | Area [mAU*s] | Height [mAU] | Area %  |
|--------|---------------|------|-------------|--------------|--------------|---------|
| 1      | 11.026        | BV   | 0.6310      | 2.34169e4    | 565.57068    | 50.1171 |
| 2      | 13.187        | VB   | 0.7862      | 2.33074e4    | 445.63153    | 49.8829 |

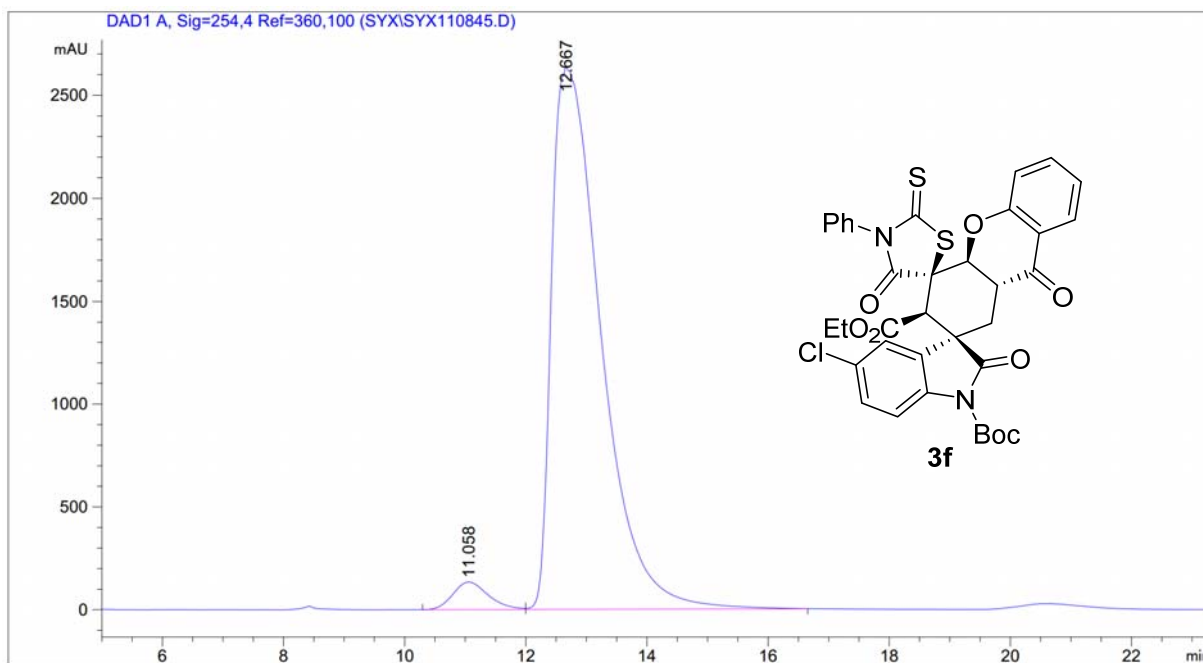

| Peak # | RetTime [min] | Type | Width [min] | Area [mAU*s] | Height [mAU] | Area %  |
|--------|---------------|------|-------------|--------------|--------------|---------|
| 1      | 11.058        | BV   | 0.6220      | 5447.13330   | 134.08180    | 3.5214  |
| 2      | 12.667        | VB   | 0.6750      | 1.49237e5    | 2634.17163   | 96.4786 |

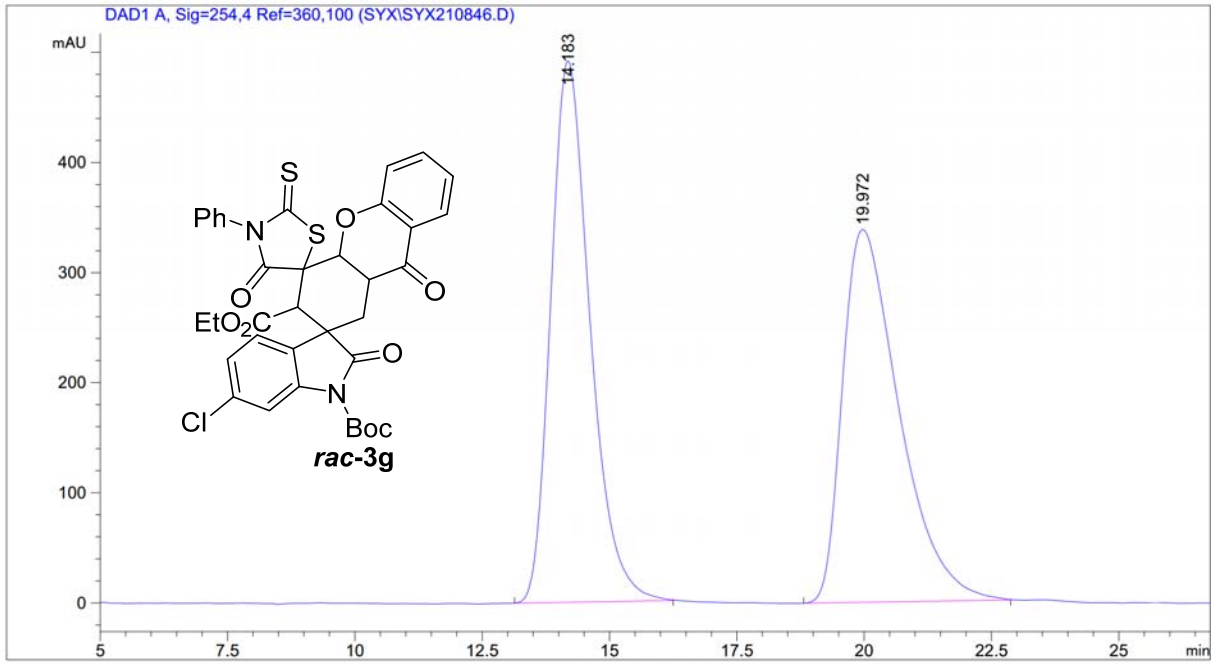

| Peak # | RetTime [min] | Type | Width [min] | Area [mAU*s] | Height [mAU] | Area %  |
|--------|---------------|------|-------------|--------------|--------------|---------|
| 1      | 14.183        | BB   | 0.8161      | 2.63848e4    | 491.67566    | 50.2248 |
| 2      | 19.972        | BB   | 1.1633      | 2.61486e4    | 338.47537    | 49.7752 |

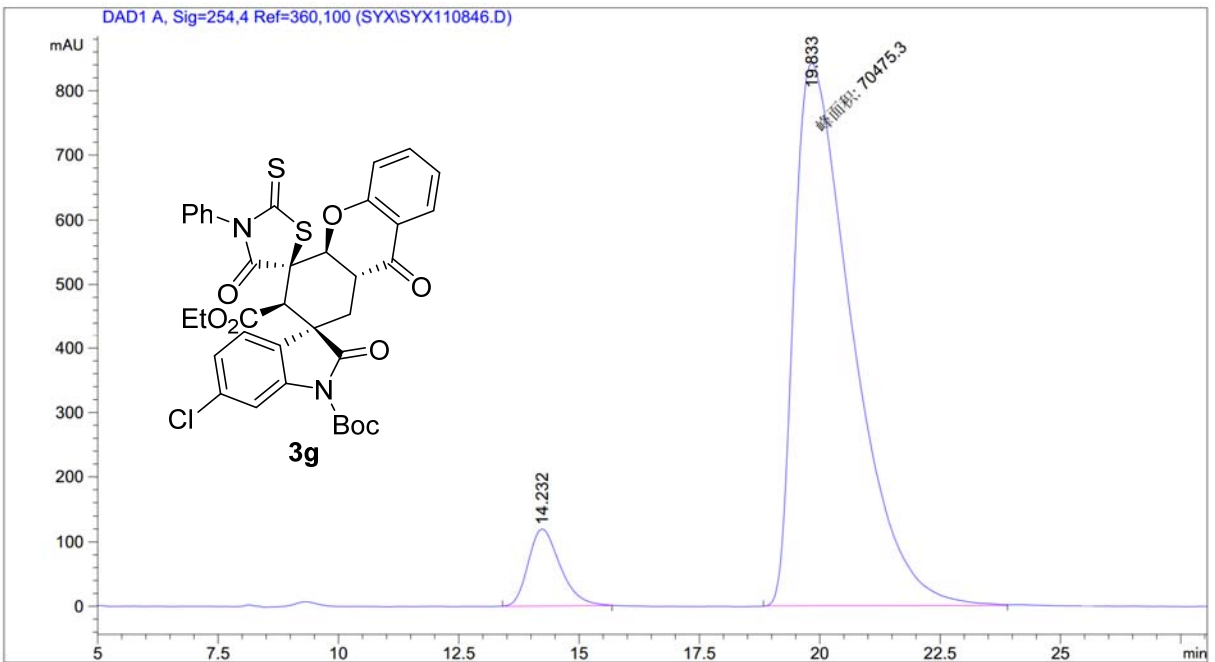

| Peak # | RetTime [min] | Type | Width [min] | Area [mAU*s] | Height [mAU] | Area %  |
|--------|---------------|------|-------------|--------------|--------------|---------|
| 1      | 14.232        | BB   | 0.6976      | 5527.49463   | 119.50448    | 7.2728  |
| 2      | 19.833        | MM   | 1.3950      | 7.04753e4    | 841.97900    | 92.7272 |

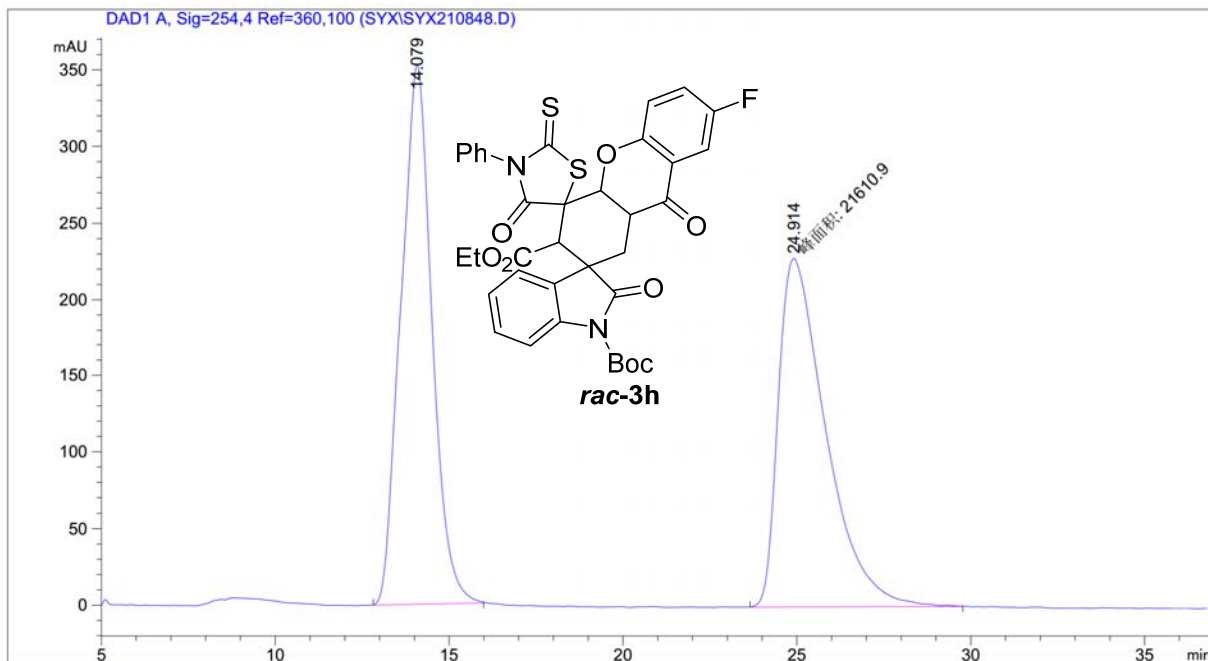

| Peak # | RetTime [min] | Type | Width [min] | Area [mAU*s] | Height [mAU] | Area %  |
|--------|---------------|------|-------------|--------------|--------------|---------|
| 1      | 14.079        | BB   | 0.8892      | 2.18039e4    | 352.71237    | 50.2223 |
| 2      | 24.914        | MM   | 1.5787      | 2.16109e4    | 228.15353    | 49.7777 |

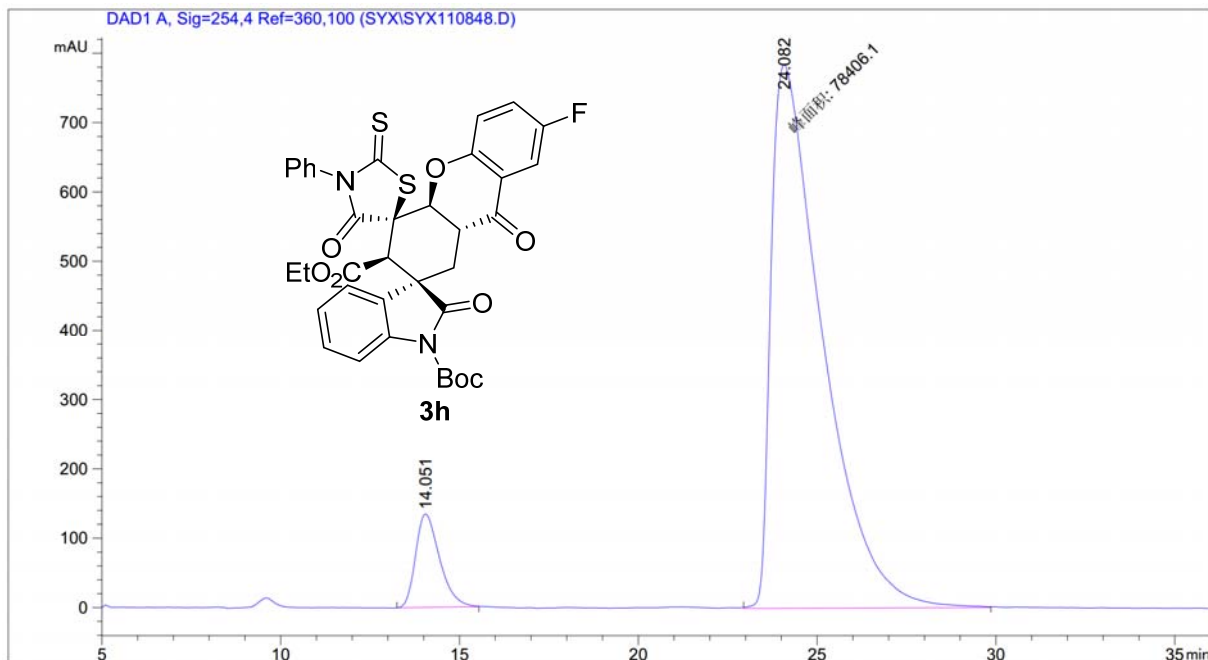

| Peak # | RetTime [min] | Type | Width [min] | Area [mAU*s] | Height [mAU] | Area %  |
|--------|---------------|------|-------------|--------------|--------------|---------|
| 1      | 14.051        | BB   | 0.7067      | 6287.44727   | 134.66396    | 7.4238  |
| 2      | 24.082        | MM   | 1.6658      | 7.84061e4    | 784.47076    | 92.5762 |

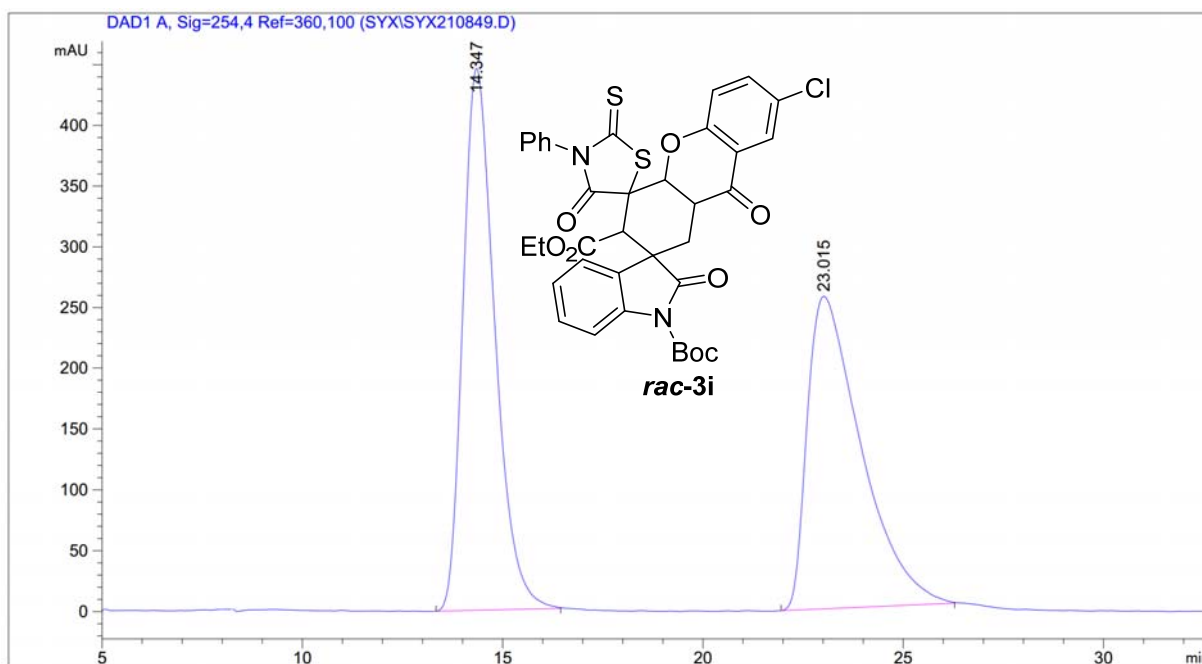

| Peak # | RetTime [min] | Type | Width [min] | Area [mAU*s] | Height [mAU] | Area %  |
|--------|---------------|------|-------------|--------------|--------------|---------|
| 1      | 14.347        | BB   | 0.8413      | 2.46600e4    | 445.85992    | 50.7348 |
| 2      | 23.015        | BB   | 1.3092      | 2.39456e4    | 256.96802    | 49.2652 |

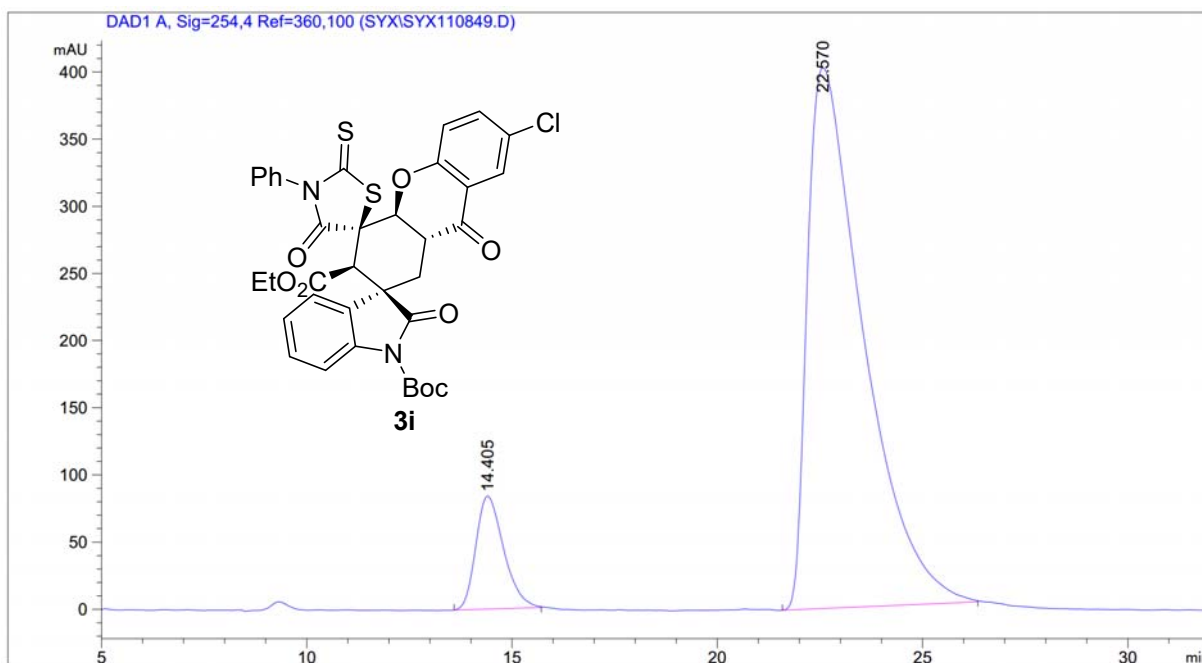

| Peak # | RetTime [min] | Type | Width [min] | Area [mAU*s] | Height [mAU] | Area %  |
|--------|---------------|------|-------------|--------------|--------------|---------|
| 1      | 14.405        | BB   | 0.7195      | 3954.70801   | 83.96357     | 9.4047  |
| 2      | 22.570        | BB   | 1.3344      | 3.80958e4    | 402.43219    | 90.5953 |

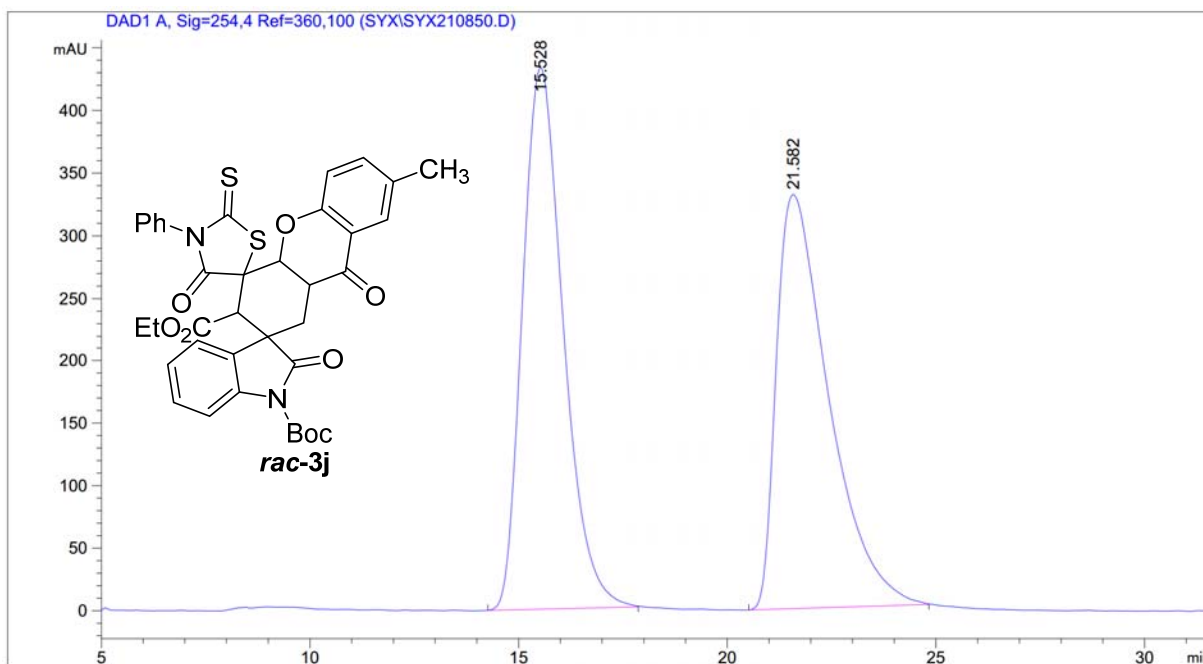

| Peak # | RetTime [min] | Type | Width [min] | Area [mAU*s] | Height [mAU] | Area %  |
|--------|---------------|------|-------------|--------------|--------------|---------|
| 1      | 15.528        | BB   | 0.9909      | 2.93550e4    | 433.01993    | 50.4630 |
| 2      | 21.582        | BB   | 1.2370      | 2.88163e4    | 331.22510    | 49.5370 |

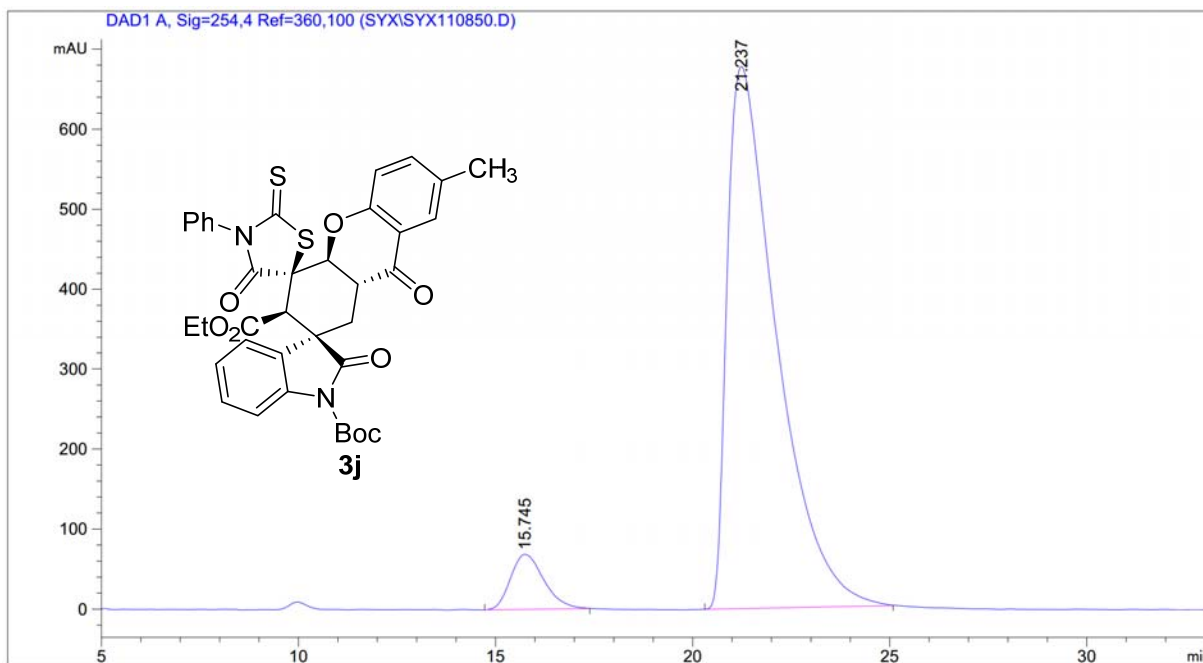

| Peak # | RetTime [min] | Type | Width [min] | Area [mAU*s] | Height [mAU] | Area %  |
|--------|---------------|------|-------------|--------------|--------------|---------|
| 1      | 15.745        | BB   | 0.8658      | 4043.66260   | 68.78854     | 6.4210  |
| 2      | 21.237        | BB   | 1.2726      | 5.89320e4    | 677.64038    | 93.5790 |

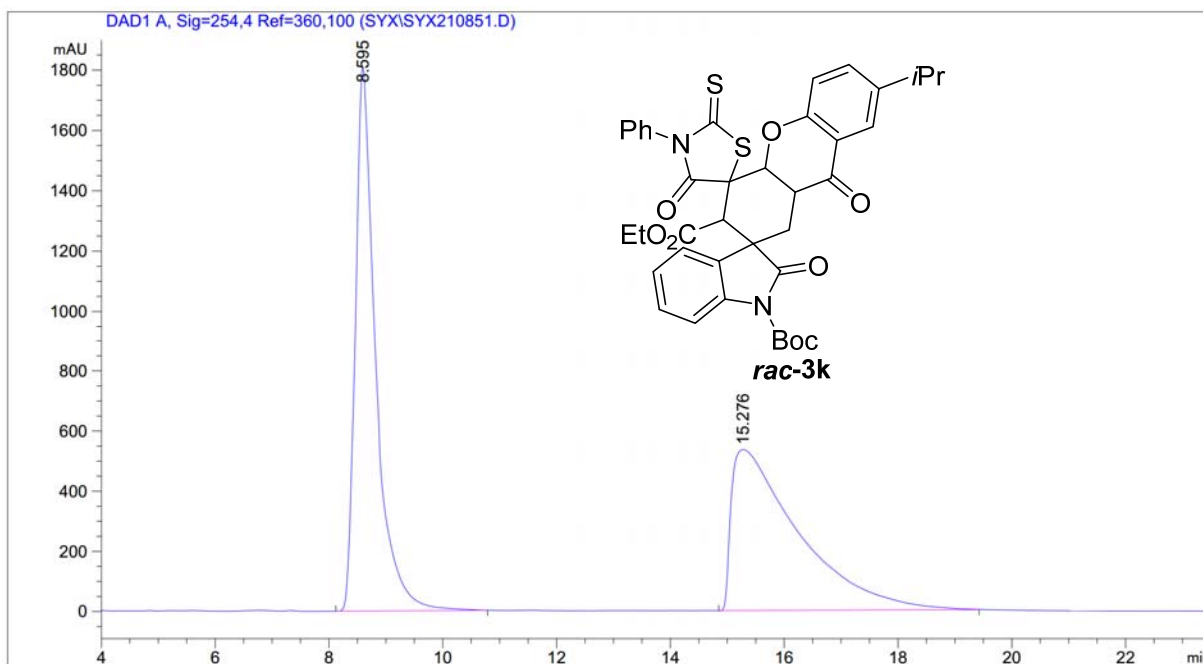

| Peak # | RetTime [min] | Type | Width [min] | Area [mAU*s] | Height [mAU] | Area %  |
|--------|---------------|------|-------------|--------------|--------------|---------|
| 1      | 8.595         | BB   | 0.3502      | 4.46543e4    | 1807.60303   | 50.4349 |
| 2      | 15.276        | BB   | 1.0961      | 4.38841e4    | 535.46771    | 49.5651 |

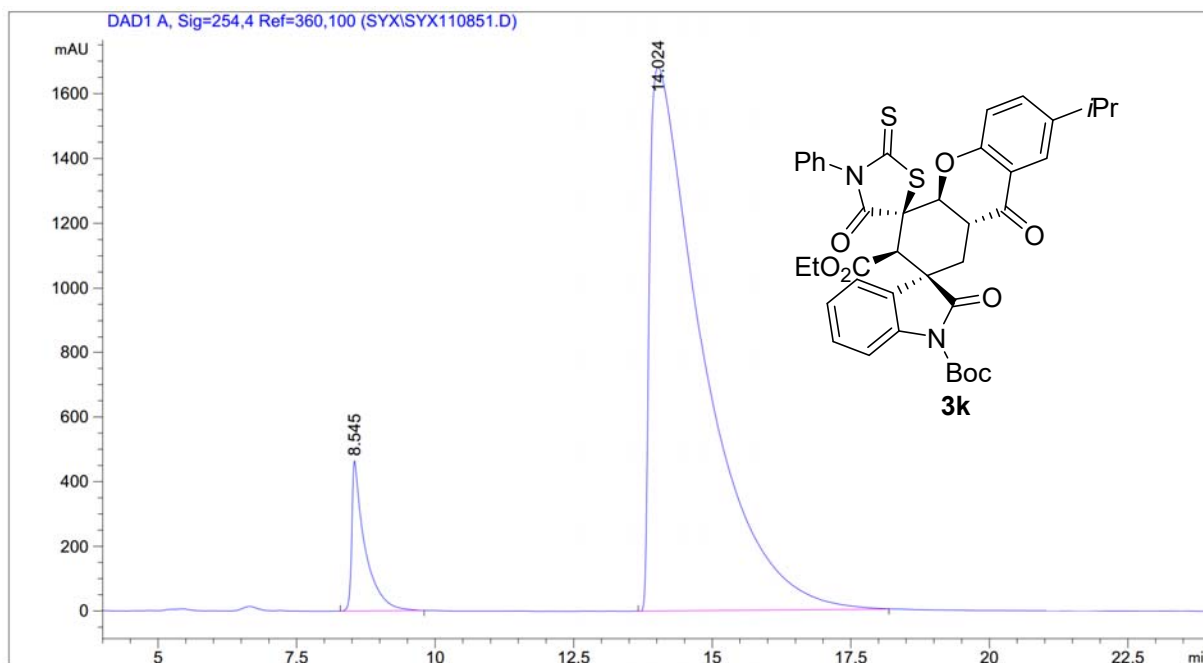

| Peak # | RetTime [min] | Type | Width [min] | Area [mAU*s] | Height [mAU] | Area %  |
|--------|---------------|------|-------------|--------------|--------------|---------|
| 1      | 8.545         | BB   | 0.2136      | 7630.12109   | 464.62888    | 6.3499  |
| 2      | 14.024        | BB   | 0.8572      | 1.12531e5    | 1680.66382   | 93.6501 |

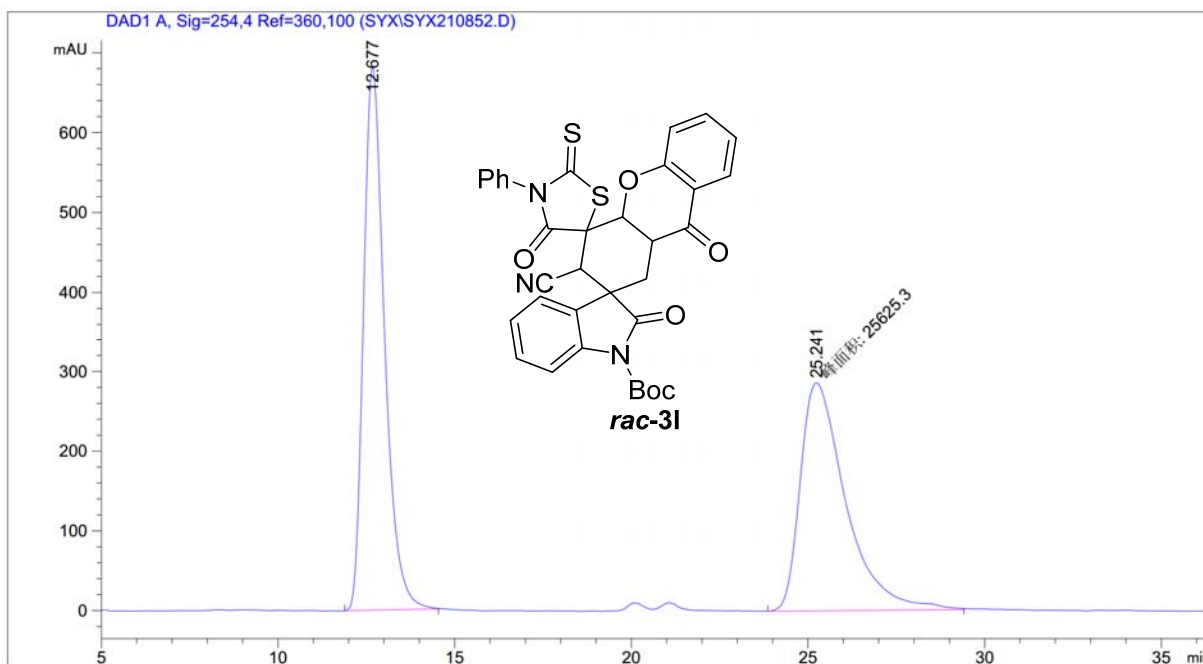

| Peak # | RetTime [min] | Type | Width [min] | Area [mAU*s] | Height [mAU] | Area %  |
|--------|---------------|------|-------------|--------------|--------------|---------|
| 1      | 12.677        | BB   | 0.6336      | 2.81153e4    | 681.11914    | 52.3167 |
| 2      | 25.241        | MM   | 1.4937      | 2.56253e4    | 285.93057    | 47.6833 |

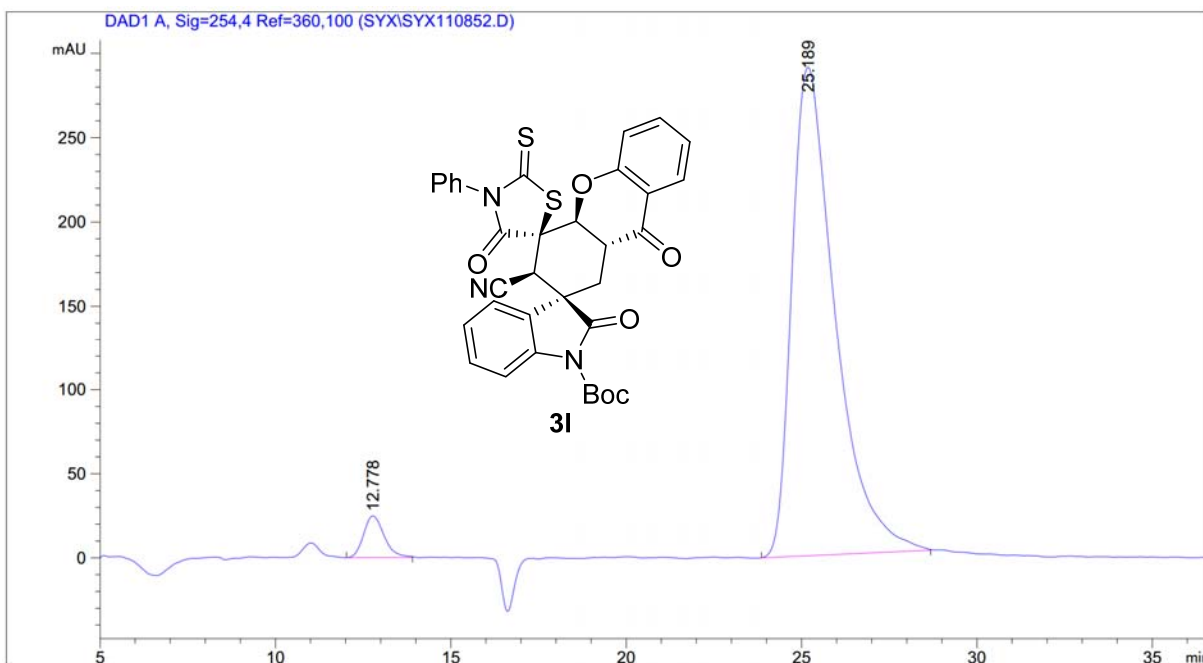

| Peak # | RetTime [min] | Type | Width [min] | Area [mAU*s] | Height [mAU] | Area %  |
|--------|---------------|------|-------------|--------------|--------------|---------|
| 1      | 12.778        | BB   | 0.6111      | 1006.79053   | 24.72140     | 3.8854  |
| 2      | 25.189        | BB   | 1.2184      | 2.49056e4    | 290.43900    | 96.1146 |

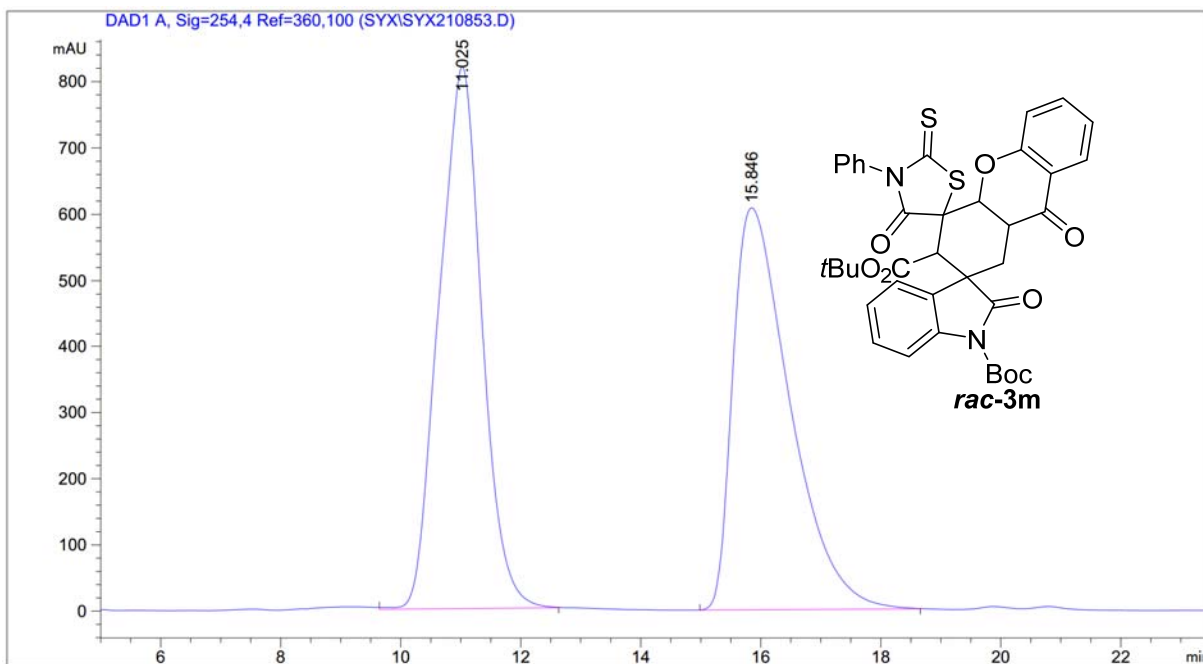

| Peak # | RetTime [min] | Type | Width [min] | Area [mAU*s] | Height [mAU] | Area %  |
|--------|---------------|------|-------------|--------------|--------------|---------|
| 1      | 11.025        | VB   | 0.7189      | 4.06117e4    | 818.42493    | 50.3378 |
| 2      | 15.846        | BB   | 0.9810      | 4.00666e4    | 607.83887    | 49.6622 |

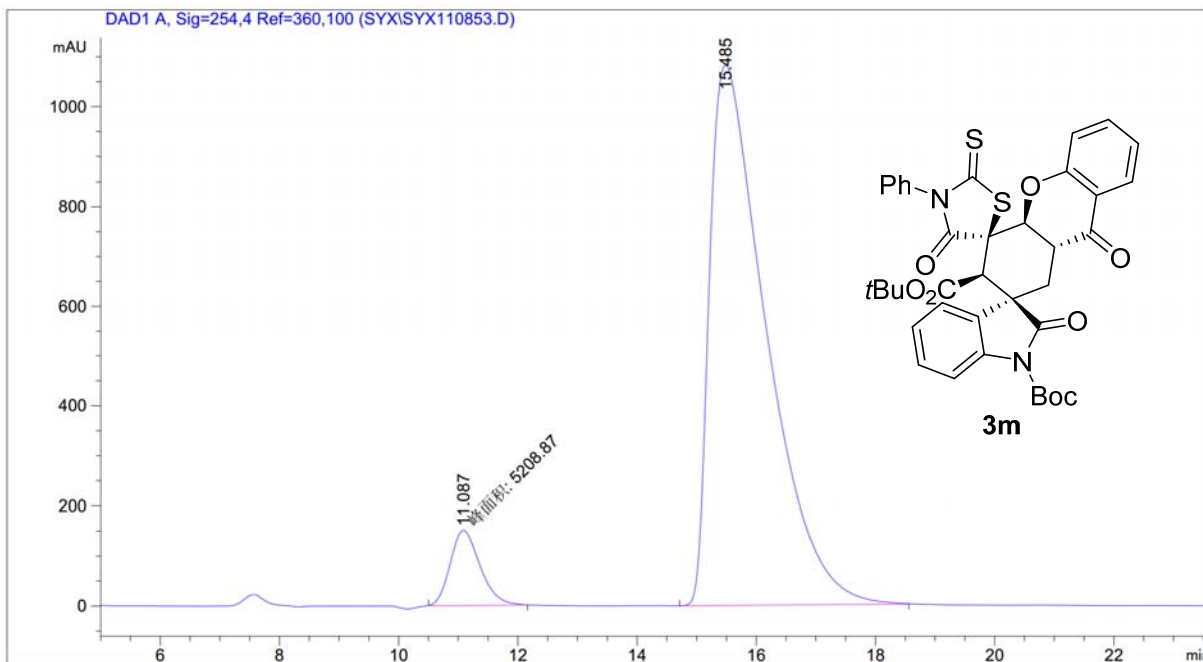

| Peak # | RetTime [min] | Type | Width [min] | Area [mAU*s] | Height [mAU] | Area %  |
|--------|---------------|------|-------------|--------------|--------------|---------|
| 1      | 11.087        | MM   | 0.5780      | 5208.86621   | 150.20609    | 6.8171  |
| 2      | 15.485        | BB   | 0.9297      | 7.12003e4    | 1082.07019   | 93.1829 |



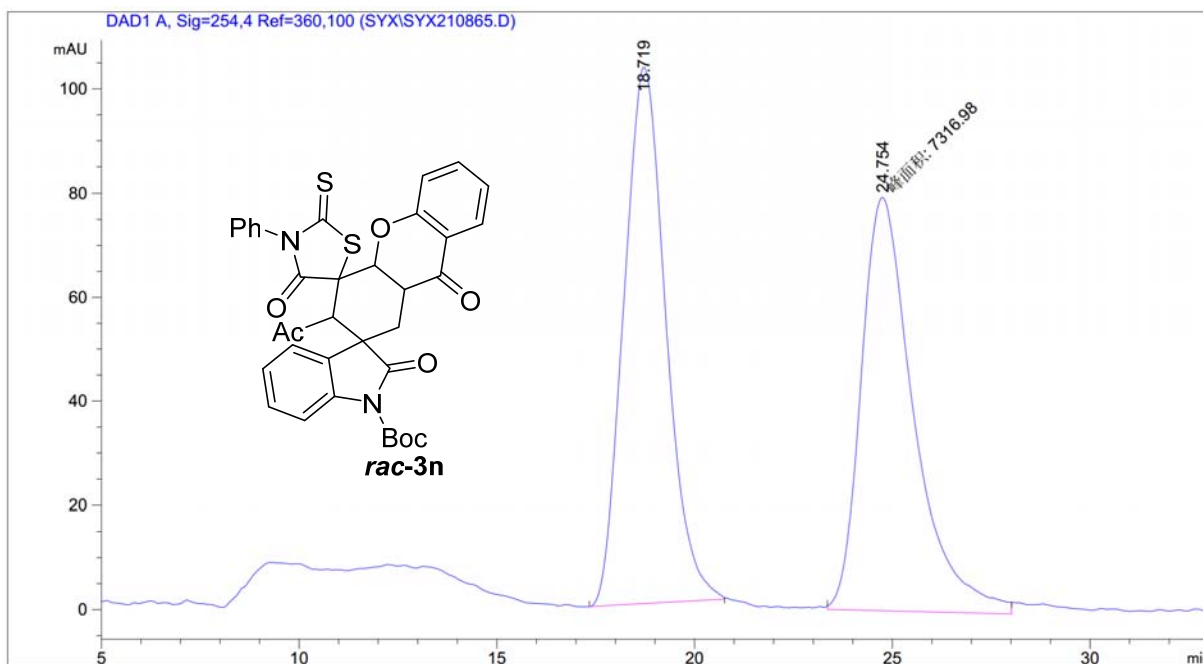

| Peak # | RetTime [min] | Type | Width [min] | Area [mAU*s] | Height [mAU] | Area %  |
|--------|---------------|------|-------------|--------------|--------------|---------|
| 1      | 18.719        | BB   | 0.9996      | 7604.99561   | 102.97774    | 50.9651 |
| 2      | 24.754        | MM   | 1.5355      | 7316.98145   | 79.42027     | 49.0349 |

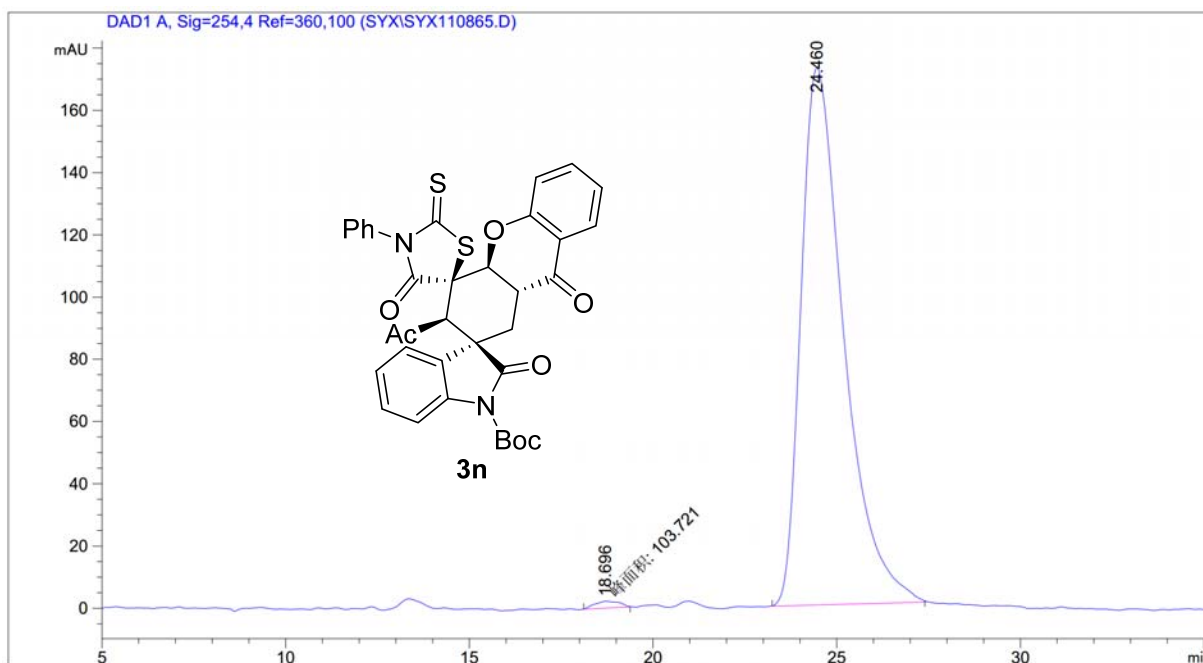

| Peak # | RetTime [min] | Type | Width [min] | Area [mAU*s] | Height [mAU] | Area %  |
|--------|---------------|------|-------------|--------------|--------------|---------|
| 1      | 18.696        | MM   | 0.7713      | 103.72121    | 2.24132      | 0.7367  |
| 2      | 24.460        | BB   | 1.1707      | 1.39750e4    | 172.57716    | 99.2633 |

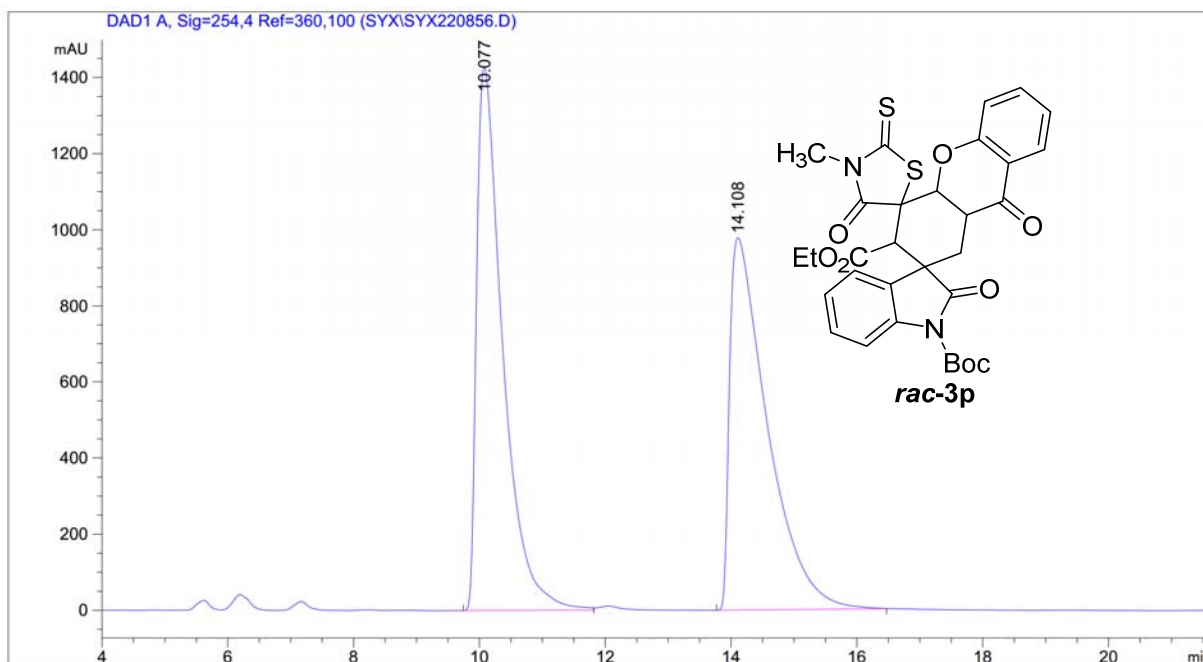

| Peak # | RetTime [min] | Type | Width [min] | Area [mAU*s] | Height [mAU] | Area %  |
|--------|---------------|------|-------------|--------------|--------------|---------|
| 1      | 10.077        | BB   | 0.4320      | 4.11081e4    | 1427.34863   | 50.2181 |
| 2      | 14.108        | BB   | 0.5921      | 4.07510e4    | 978.01001    | 49.7819 |

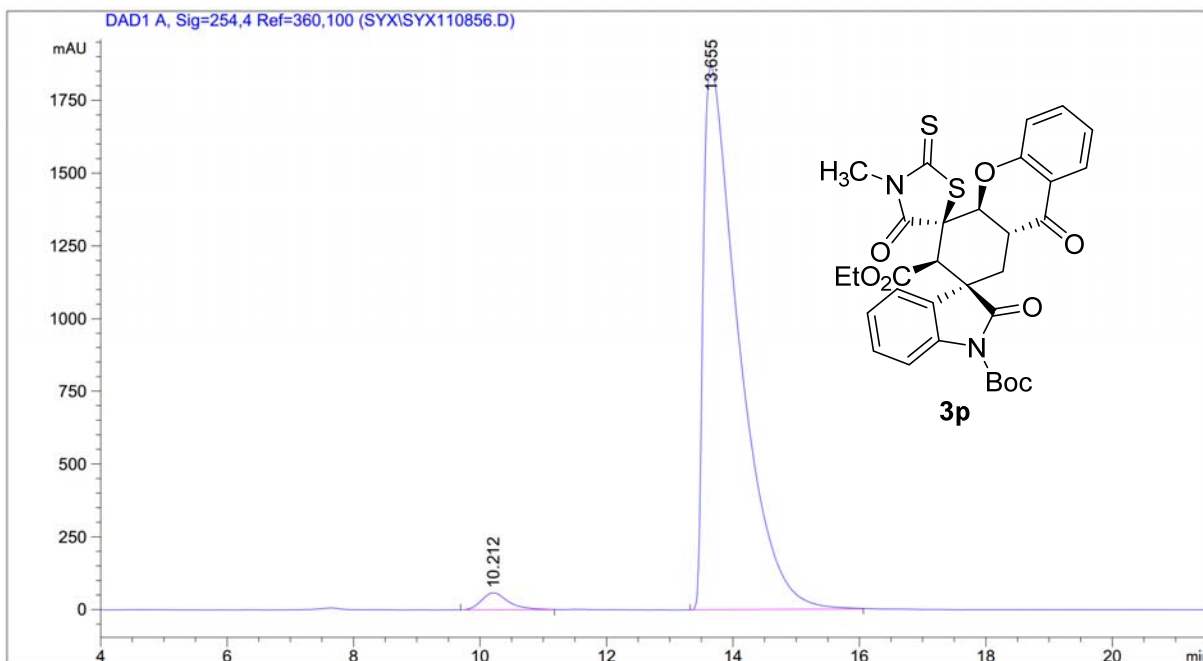

| Peak # | RetTime [min] | Type | Width [min] | Area [mAU*s] | Height [mAU] | Area %  |
|--------|---------------|------|-------------|--------------|--------------|---------|
| 1      | 10.212        | BB   | 0.4507      | 1713.11597   | 58.32838     | 2.2932  |
| 2      | 13.655        | BB   | 0.5362      | 7.29896e4    | 1866.63208   | 97.7068 |

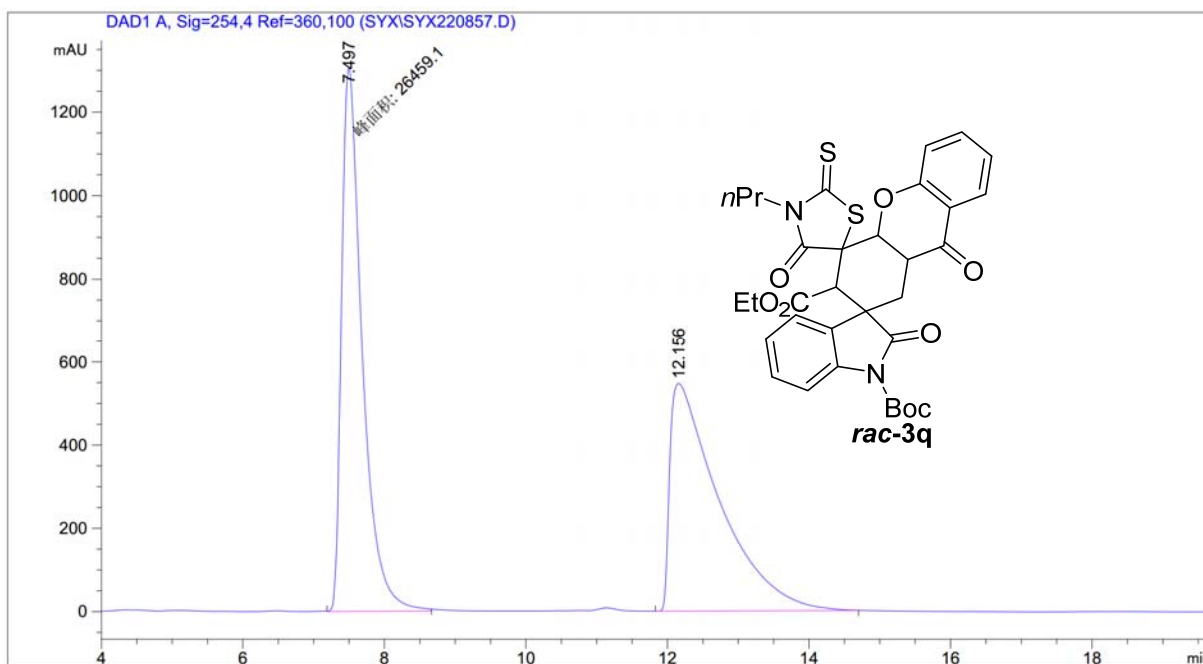

| Peak # | RetTime [min] | Type | Width [min] | Area [mAU*s] | Height [mAU] | Area %  |
|--------|---------------|------|-------------|--------------|--------------|---------|
| 1      | 7.497         | MF   | 0.3378      | 2.64591e4    | 1305.30627   | 49.9891 |
| 2      | 12.156        | BB   | 0.6610      | 2.64707e4    | 546.60748    | 50.0109 |

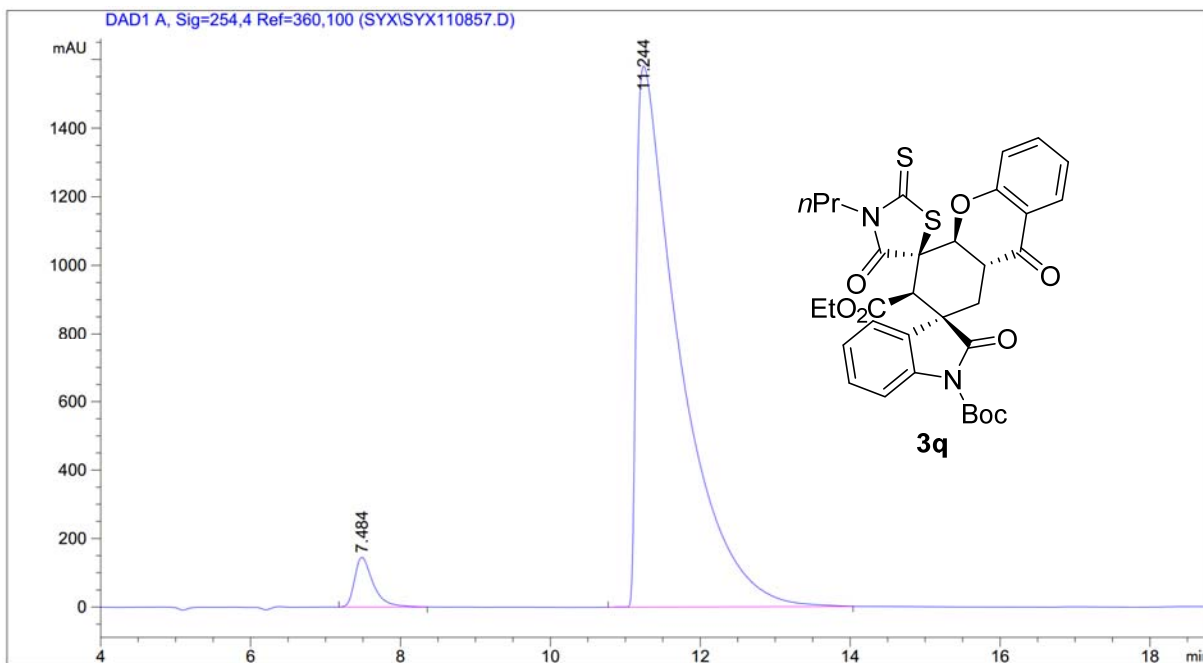

| Peak # | RetTime [min] | Type | Width [min] | Area [mAU*s] | Height [mAU] | Area %  |
|--------|---------------|------|-------------|--------------|--------------|---------|
| 1      | 7.484         | BB   | 0.2590      | 2502.57227   | 145.23837    | 3.8093  |
| 2      | 11.244        | BB   | 0.5383      | 6.31930e4    | 1581.22510   | 96.1907 |

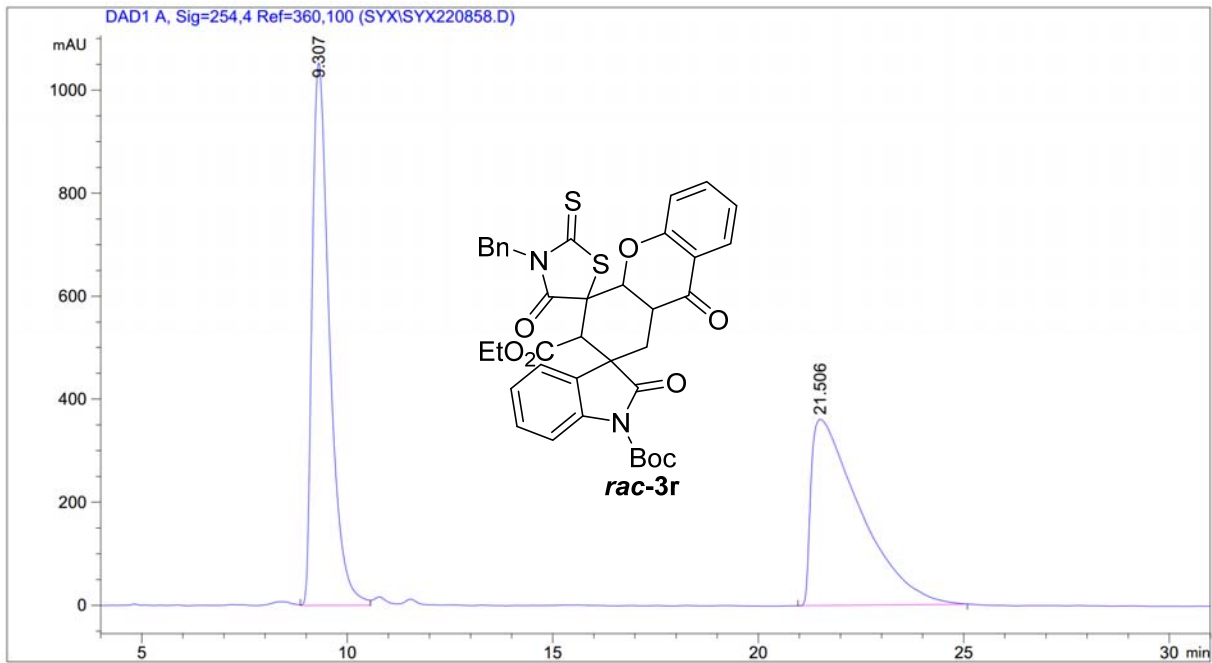

| Peak # | RetTime [min] | Type | Width [min] | Area [mAU*s] | Height [mAU] | Area %  |
|--------|---------------|------|-------------|--------------|--------------|---------|
| 1      | 9.307         | VV   | 0.4520      | 3.08622e4    | 1052.93384   | 50.6350 |
| 2      | 21.506        | BB   | 1.1269      | 3.00881e4    | 360.80914    | 49.3650 |

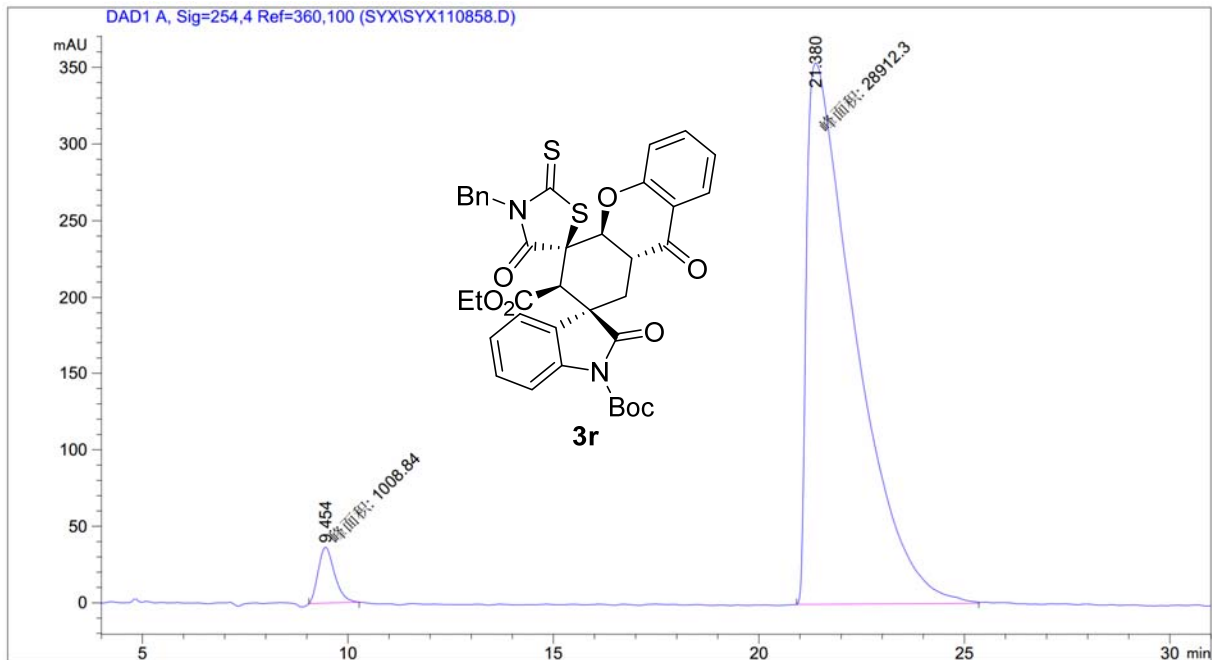

| Peak # | RetTime [min] | Type | Width [min] | Area [mAU*s] | Height [mAU] | Area %  |
|--------|---------------|------|-------------|--------------|--------------|---------|
| 1      | 9.454         | MM   | 0.4611      | 1008.84003   | 36.46187     | 3.3717  |
| 2      | 21.380        | MM   | 1.3621      | 2.89123e4    | 353.78326    | 96.6283 |

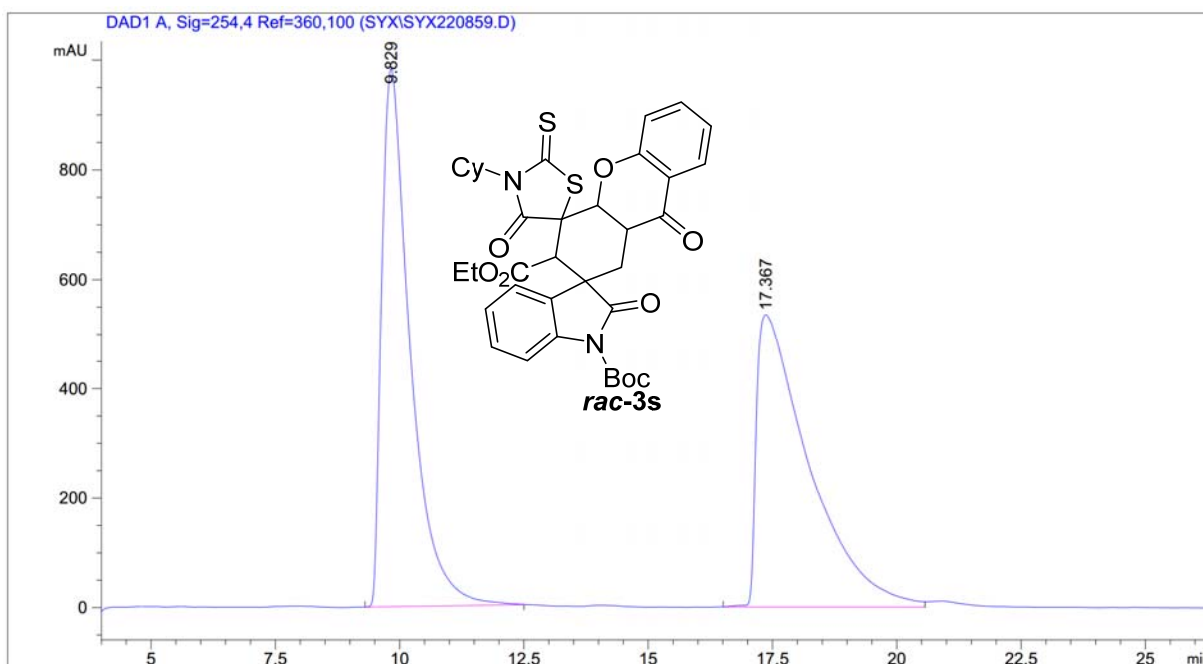

| Peak # | RetTime [min] | Type | Width [min] | Area [mAU*s] | Height [mAU] | Area %  |
|--------|---------------|------|-------------|--------------|--------------|---------|
| 1      | 9.829         | BB   | 0.5953      | 3.93657e4    | 982.77747    | 50.0628 |
| 2      | 17.367        | BB   | 0.9946      | 3.92669e4    | 534.78662    | 49.9372 |

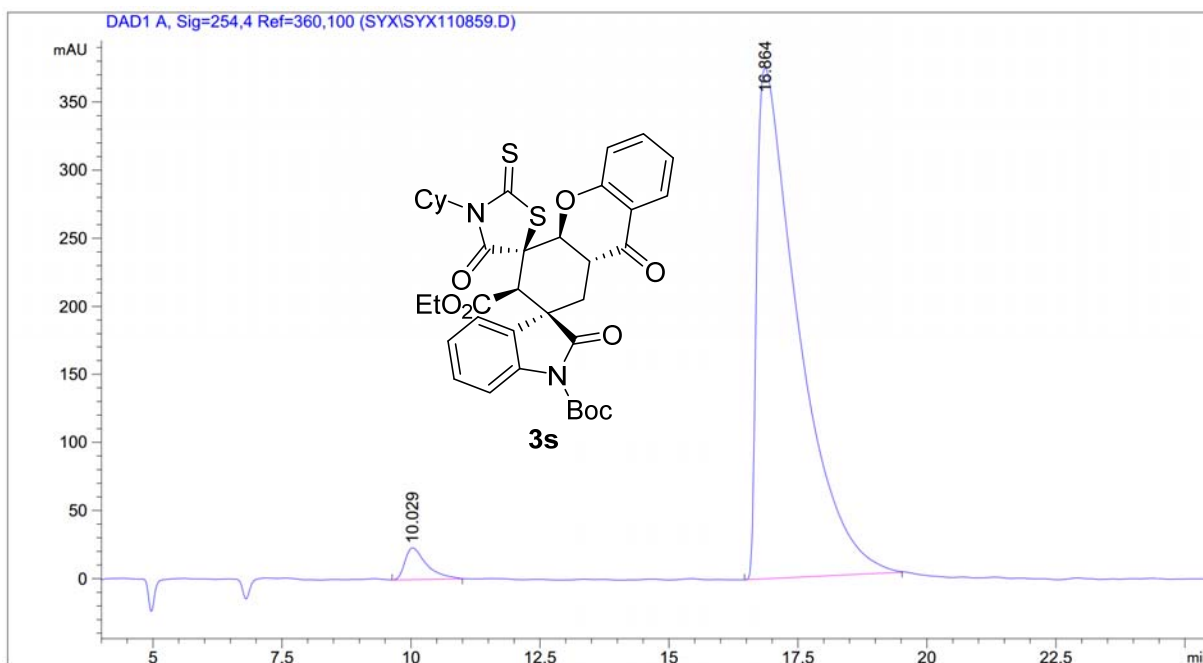

| Peak # | RetTime [min] | Type | Width [min] | Area [mAU*s] | Height [mAU] | Area %  |
|--------|---------------|------|-------------|--------------|--------------|---------|
| 1      | 10.029        | BB   | 0.4273      | 677.47961    | 23.29821     | 3.1285  |
| 2      | 16.864        | BB   | 0.7902      | 2.09773e4    | 375.21716    | 96.8715 |

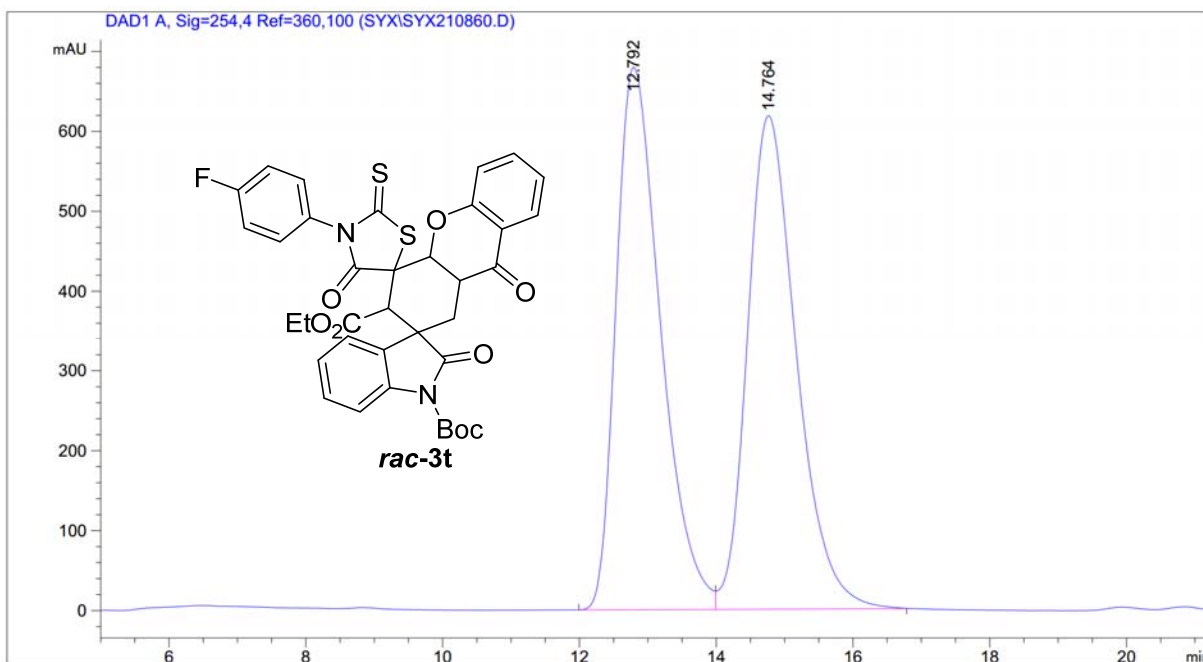

| Peak # | RetTime [min] | Type | Width [min] | Area [mAU*s] | Height [mAU] | Area %  |
|--------|---------------|------|-------------|--------------|--------------|---------|
| 1      | 12.792        | BV   | 0.6956      | 3.07201e4    | 679.25500    | 49.9999 |
| 2      | 14.764        | VB   | 0.7621      | 3.07202e4    | 617.85596    | 50.0001 |

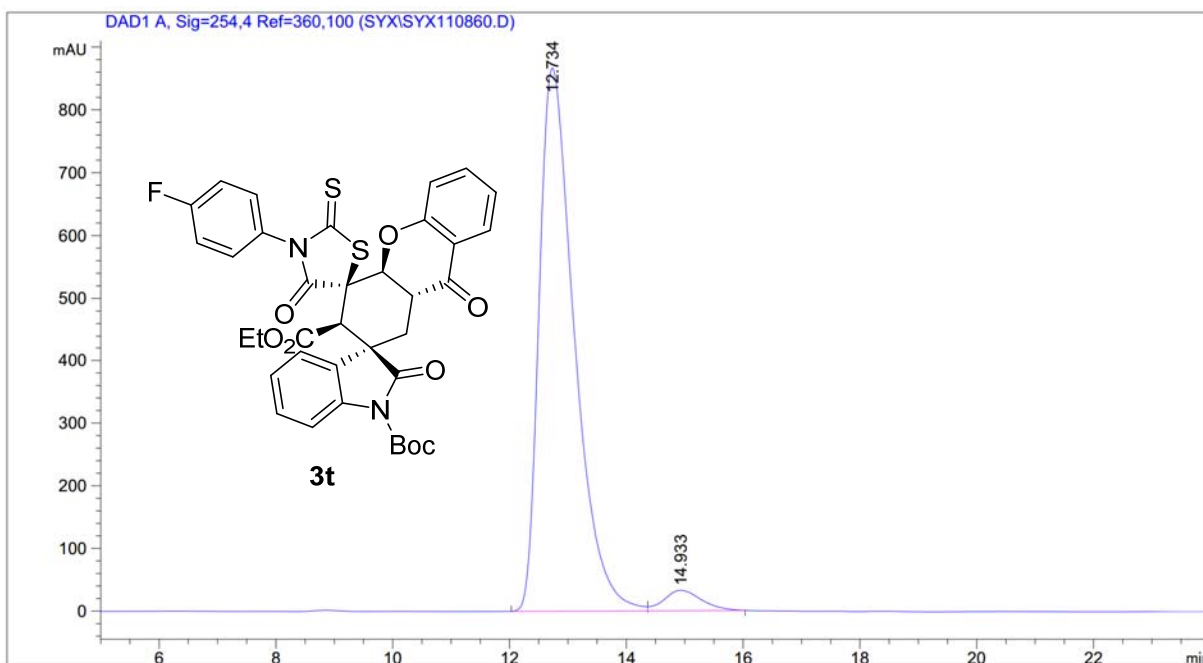

| Peak # | RetTime [min] | Type | Width [min] | Area [mAU*s] | Height [mAU] | Area %  |
|--------|---------------|------|-------------|--------------|--------------|---------|
| 1      | 12.734        | BB   | 0.6371      | 3.61938e4    | 866.80304    | 96.1107 |
| 2      | 14.933        | BB   | 0.6364      | 1464.63257   | 32.70927     | 3.8893  |

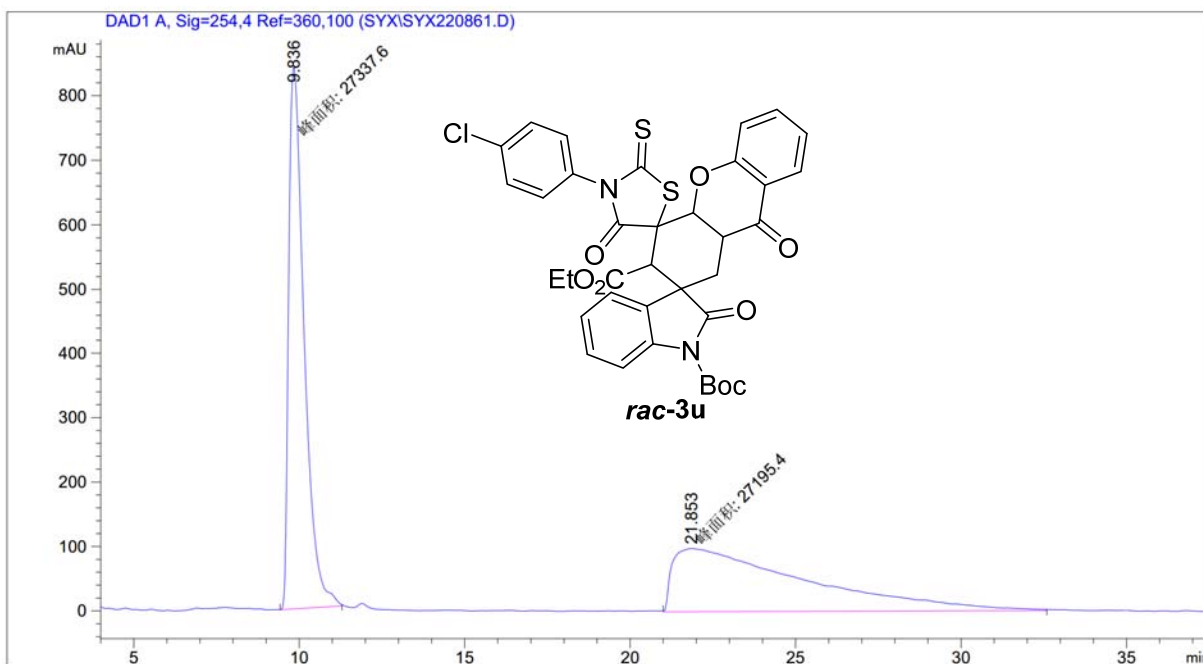

| Peak # | RetTime [min] | Type | Width [min] | Area [mAU*s] | Height [mAU] | Area %  |
|--------|---------------|------|-------------|--------------|--------------|---------|
| 1      | 9.836         | MM   | 0.5419      | 2.73376e4    | 840.75775    | 50.1304 |
| 2      | 21.853        | MM   | 4.6210      | 2.71954e4    | 98.08566     | 49.8696 |

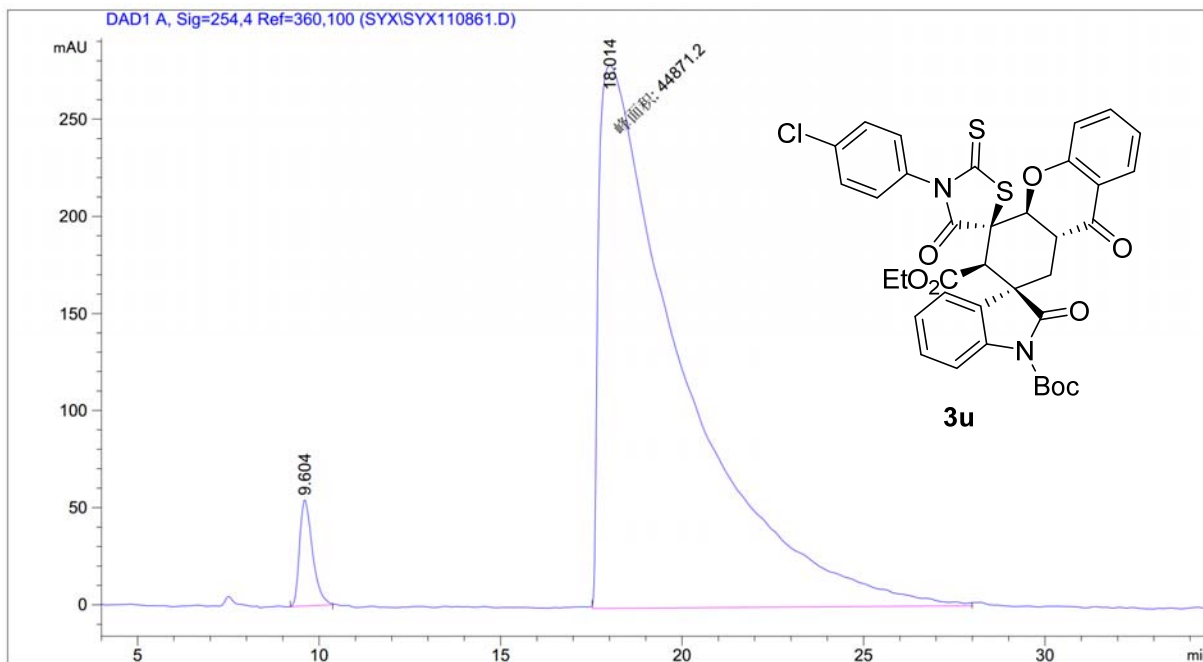

| Peak # | RetTime [min] | Type | Width [min] | Area [mAU*s] | Height [mAU] | Area %  |
|--------|---------------|------|-------------|--------------|--------------|---------|
| 1      | 9.604         | BB   | 0.3761      | 1353.75757   | 54.44183     | 2.9286  |
| 2      | 18.014        | MM   | 2.6761      | 4.48712e4    | 279.45758    | 97.0714 |

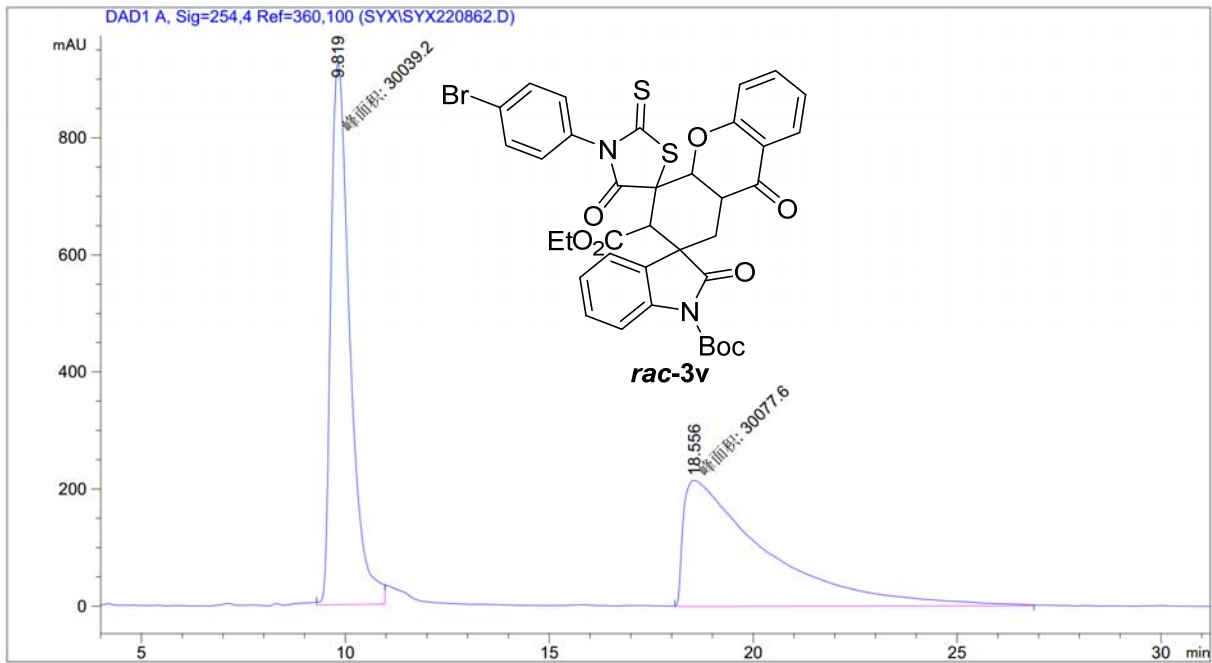

| Peak # | RetTime [min] | Type | Width [min] | Area [mAU*s] | Height [mAU] | Area %  |
|--------|---------------|------|-------------|--------------|--------------|---------|
| 1      | 9.819         | MF   | 0.5409      | 3.00392e4    | 925.65521    | 49.9680 |
| 2      | 18.556        | MM   | 2.3276      | 3.00776e4    | 215.37292    | 50.0320 |

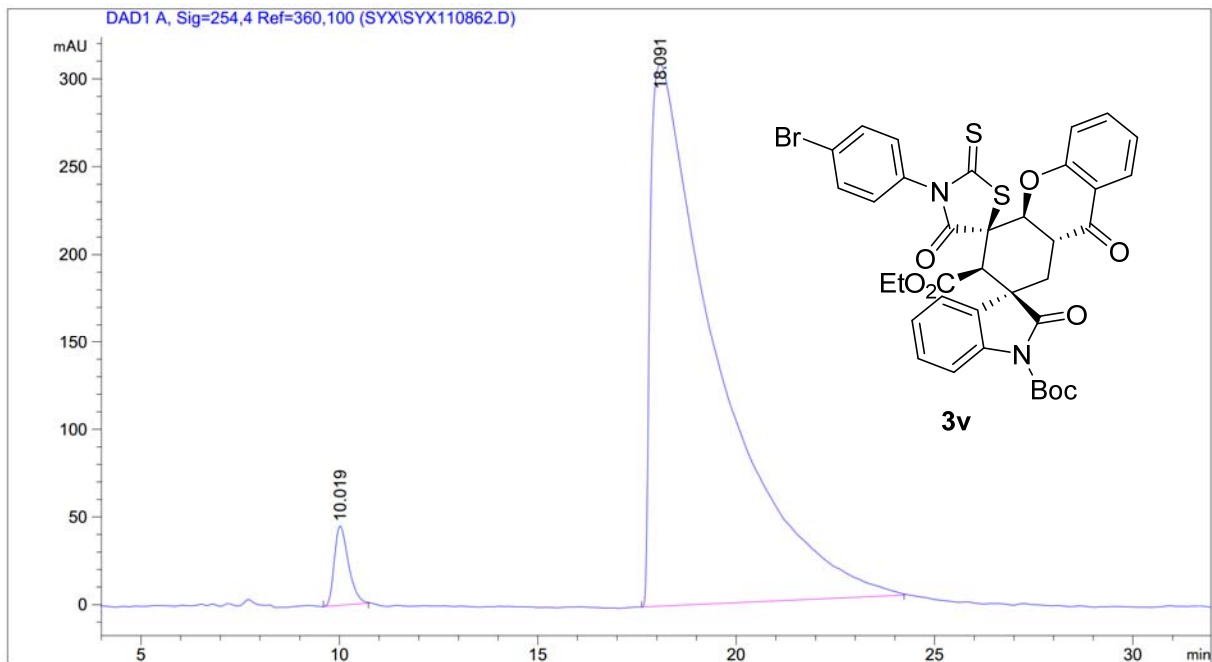

| Peak # | RetTime [min] | Type | Width [min] | Area [mAU*s] | Height [mAU] | Area %  |
|--------|---------------|------|-------------|--------------|--------------|---------|
| 1      | 10.019        | BB   | 0.3782      | 1116.14893   | 45.18058     | 2.9921  |
| 2      | 18.091        | BB   | 1.5182      | 3.61874e4    | 309.03043    | 97.0079 |



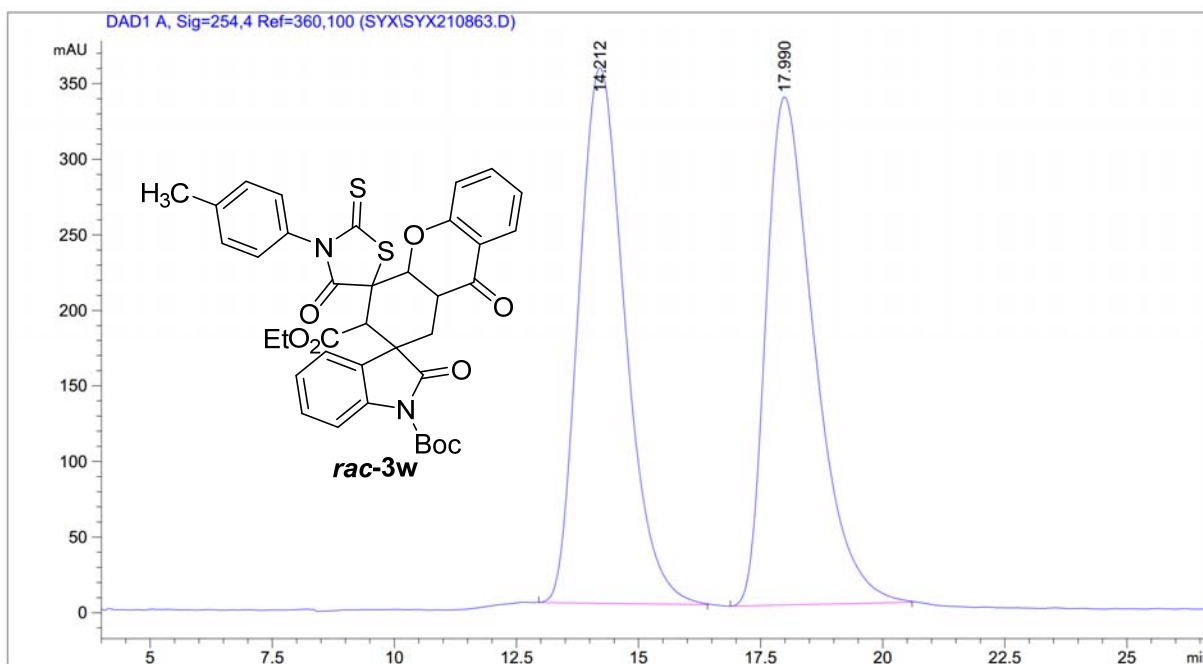

| Peak # | RetTime [min] | Type | Width [min] | Area [mAU*s] | Height [mAU] | Area %  |
|--------|---------------|------|-------------|--------------|--------------|---------|
| 1      | 14.212        | BB   | 1.0275      | 2.33029e4    | 354.21991    | 50.1565 |
| 2      | 17.990        | BB   | 1.0139      | 2.31574e4    | 336.08426    | 49.8435 |

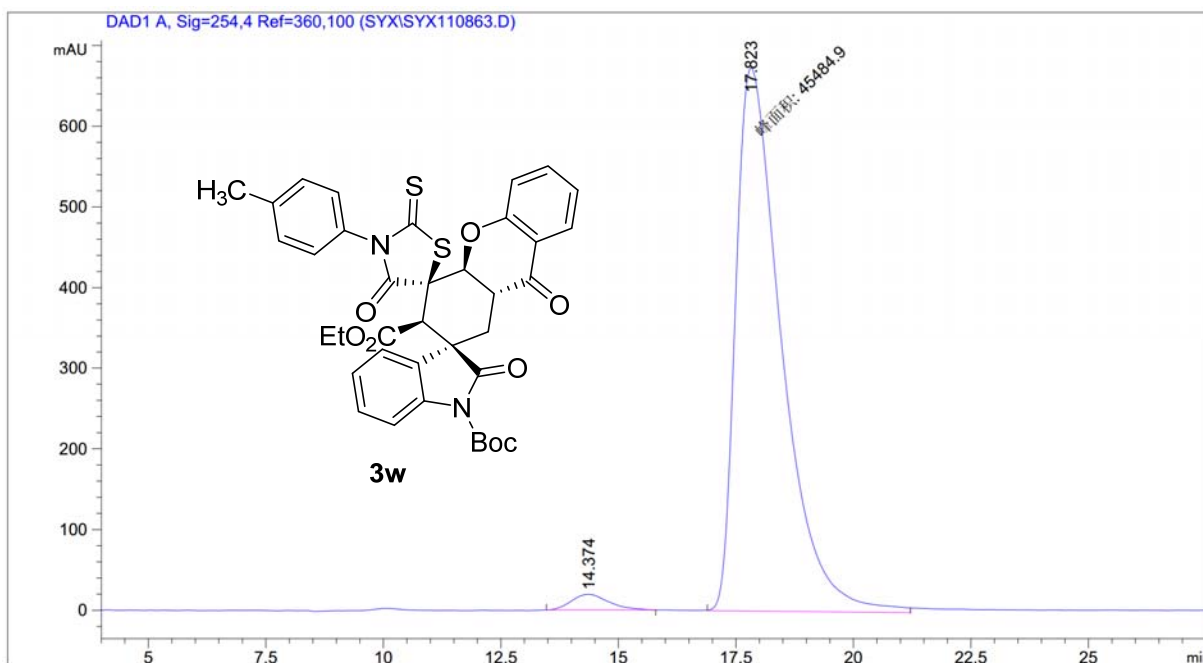

| Peak # | RetTime [min] | Type | Width [min] | Area [mAU*s] | Height [mAU] | Area %  |
|--------|---------------|------|-------------|--------------|--------------|---------|
| 1      | 14.374        | BB   | 0.6669      | 1070.32007   | 19.36193     | 2.2990  |
| 2      | 17.823        | MM   | 1.1261      | 4.54849e4    | 673.20355    | 97.7010 |

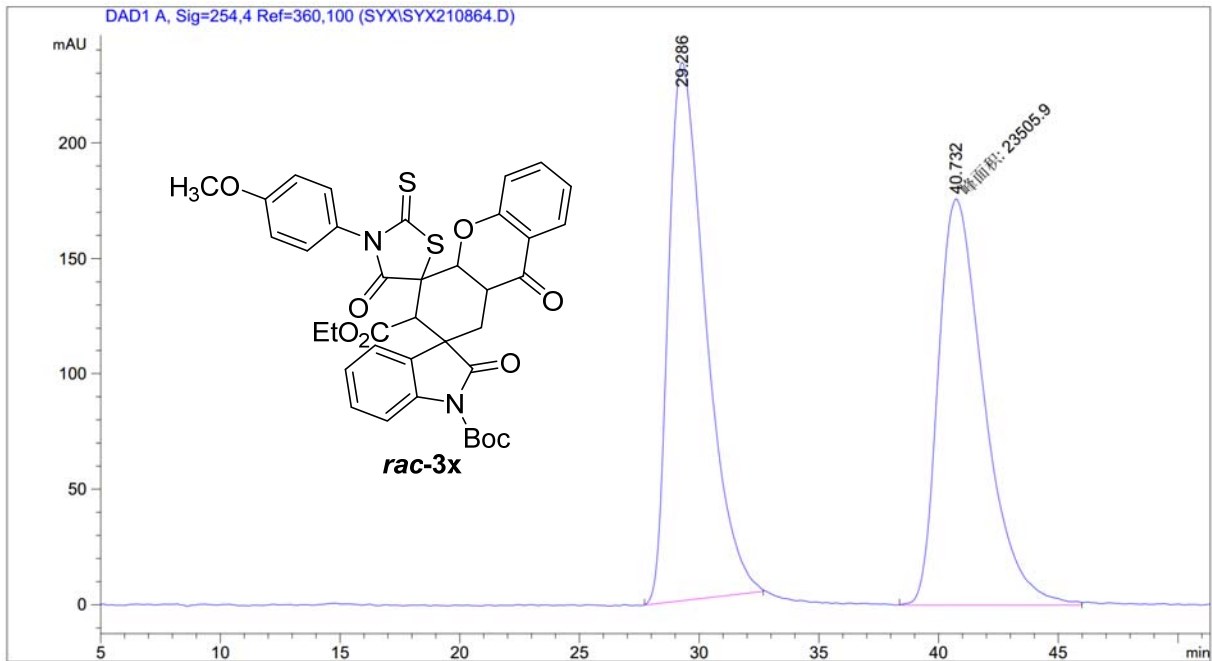

| Peak # | RetTime [min] | Type | Width [min] | Area [mAU*s] | Height [mAU] | Area %  |
|--------|---------------|------|-------------|--------------|--------------|---------|
| 1      | 29.286        | BB   | 1.5299      | 2.52733e4    | 232.92610    | 51.8116 |
| 2      | 40.732        | MM   | 2.2265      | 2.35059e4    | 175.95927    | 48.1884 |

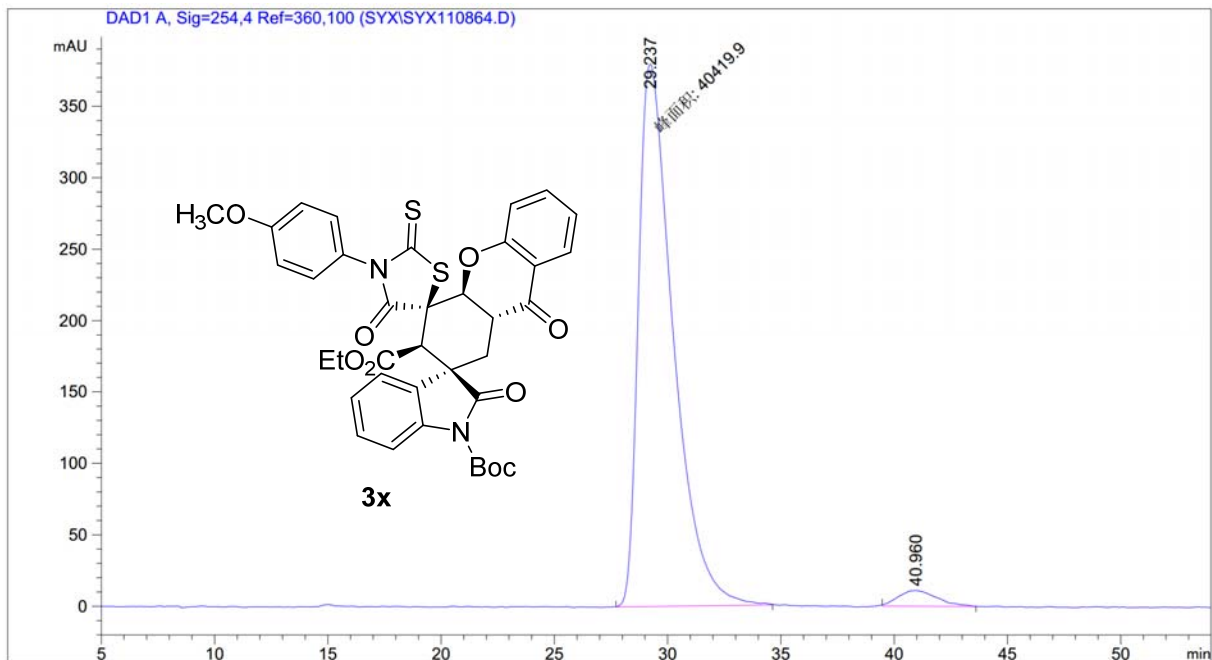

| Peak # | RetTime [min] | Type | Width [min] | Area [mAU*s] | Height [mAU] | Area %  |
|--------|---------------|------|-------------|--------------|--------------|---------|
| 1      | 29.237        | MM   | 1.7750      | 4.04199e4    | 379.53232    | 96.8665 |
| 2      | 40.960        | BB   | 1.4051      | 1307.51282   | 10.94971     | 3.1335  |

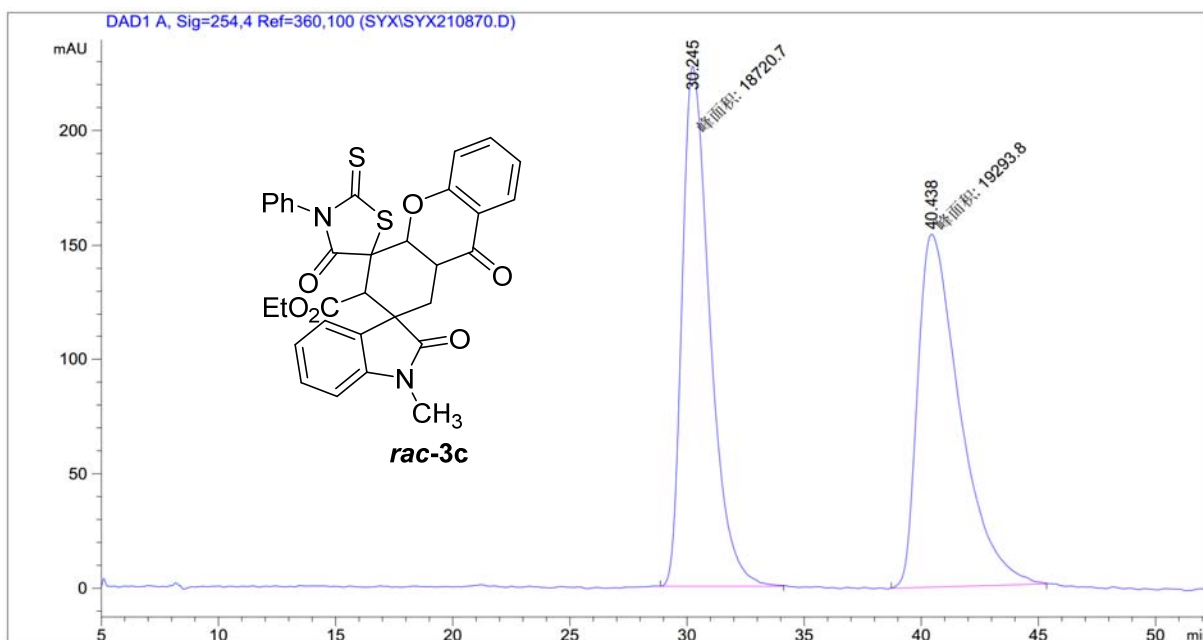

| Peak # | RetTime [min] | Type | Width [min] | Area [mAU*s] | Height [mAU] | Area %  |
|--------|---------------|------|-------------|--------------|--------------|---------|
| 1      | 30.245        | MM   | 1.3736      | 1.87207e4    | 227.14859    | 49.2462 |
| 2      | 40.438        | MM   | 2.0825      | 1.92938e4    | 154.41595    | 50.7538 |

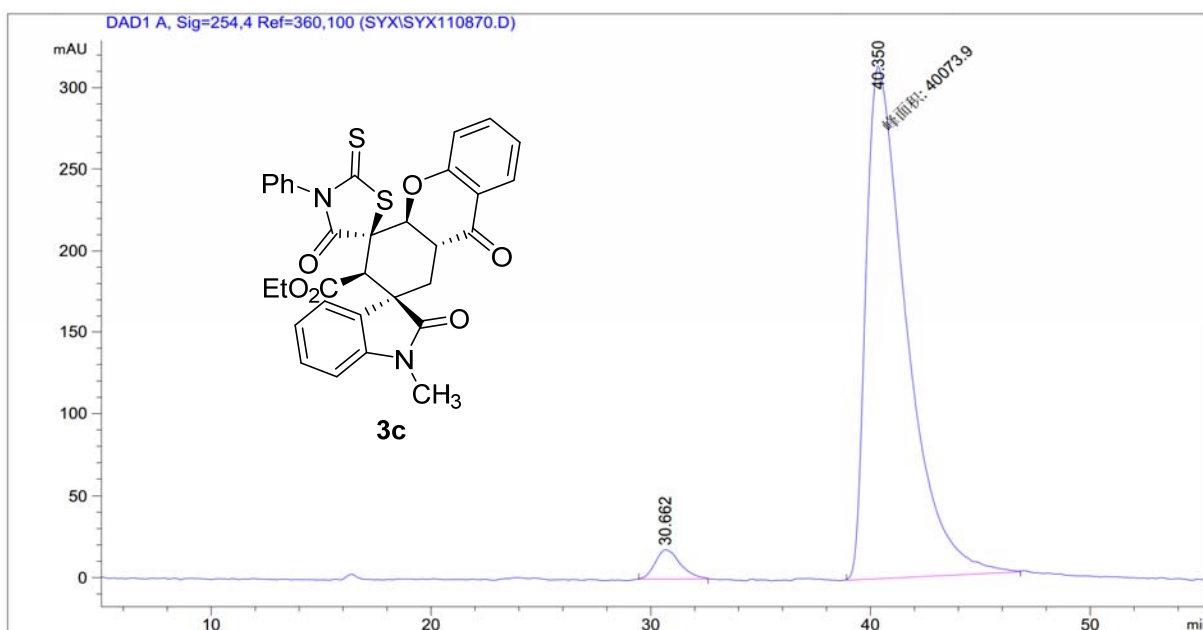

| Peak # | RetTime [min] | Type | Width [min] | Area [mAU*s] | Height [mAU] | Area %  |
|--------|---------------|------|-------------|--------------|--------------|---------|
| 1      | 30.662        | BB   | 0.9432      | 1435.18921   | 18.02044     | 3.4575  |
| 2      | 40.350        | MM   | 2.1273      | 4.00739e4    | 313.97202    | 96.5425 |

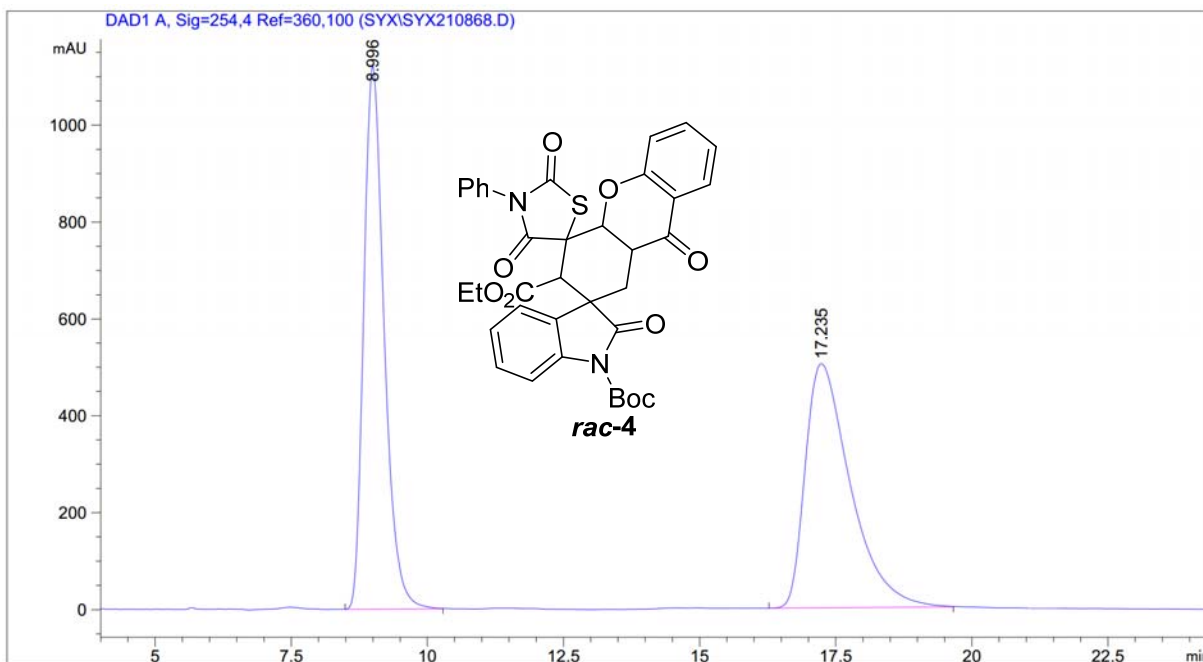

| Peak # | RetTime [min] | Type | Width [min] | Area [mAU*s] | Height [mAU] | Area %  |
|--------|---------------|------|-------------|--------------|--------------|---------|
| 1      | 8.996         | BB   | 0.4022      | 2.92082e4    | 1120.01135   | 50.2001 |
| 2      | 17.235        | BB   | 0.8555      | 2.89753e4    | 503.41330    | 49.7999 |

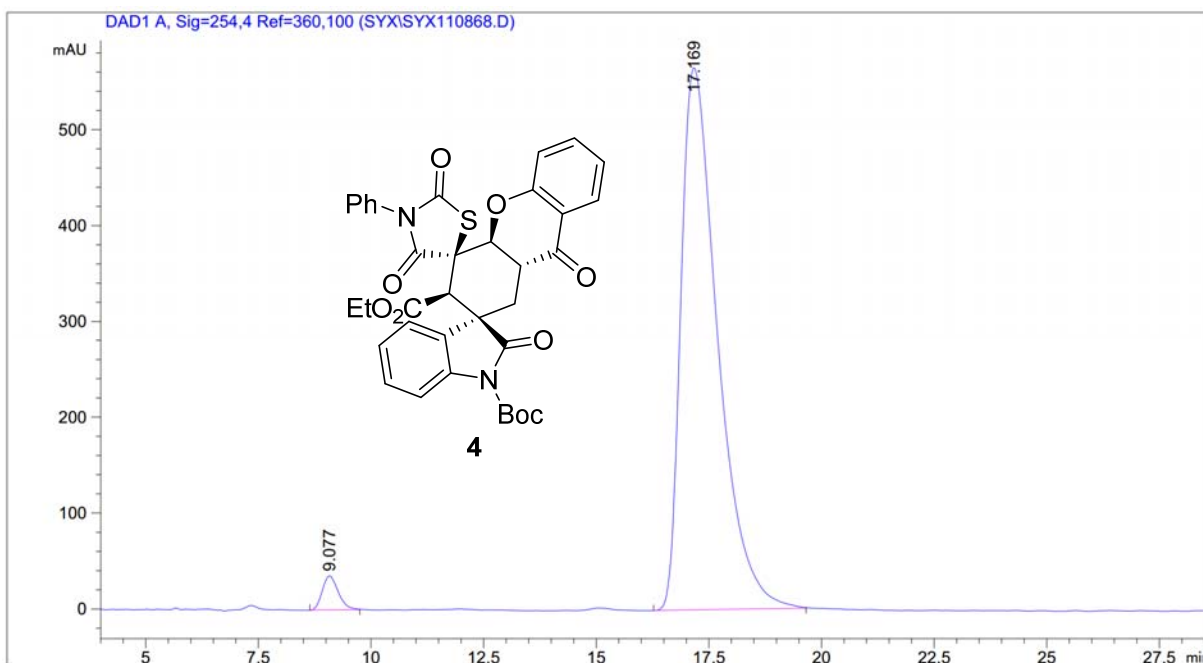

| Peak # | RetTime [min] | Type | Width [min] | Area [mAU*s] | Height [mAU] | Area %  |
|--------|---------------|------|-------------|--------------|--------------|---------|
| 1      | 9.077         | BB   | 0.3732      | 872.90979    | 35.45610     | 2.6613  |
| 2      | 17.169        | BB   | 0.8248      | 3.19275e4    | 565.38837    | 97.3387 |

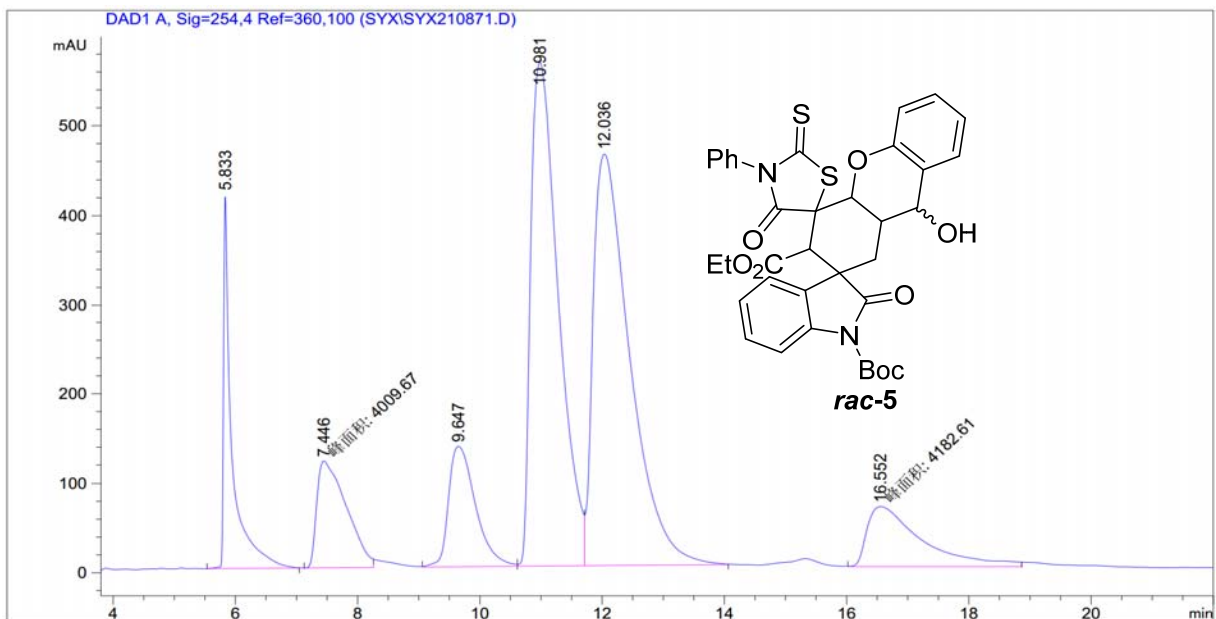

| Peak # | RetTime [min] | Type | Width [min] | Area [mAU*s] | Height [mAU] | Area %  |
|--------|---------------|------|-------------|--------------|--------------|---------|
| 1      | 5.833         | BB   | 0.1235      | 3933.65039   | 419.01163    | 7.3865  |
| 2      | 7.446         | MF   | 0.5612      | 4009.66553   | 119.07928    | 7.5292  |
| 3      | 9.647         | BV   | 0.4722      | 4125.06396   | 134.36517    | 7.7459  |
| 4      | 10.981        | VV   | 0.4793      | 1.77401e4    | 563.56036    | 33.3116 |
| 5      | 12.036        | VB   | 0.6303      | 1.92638e4    | 460.29123    | 36.1729 |
| 6      | 16.552        | MM   | 1.0362      | 4182.60986   | 67.27588     | 7.8539  |

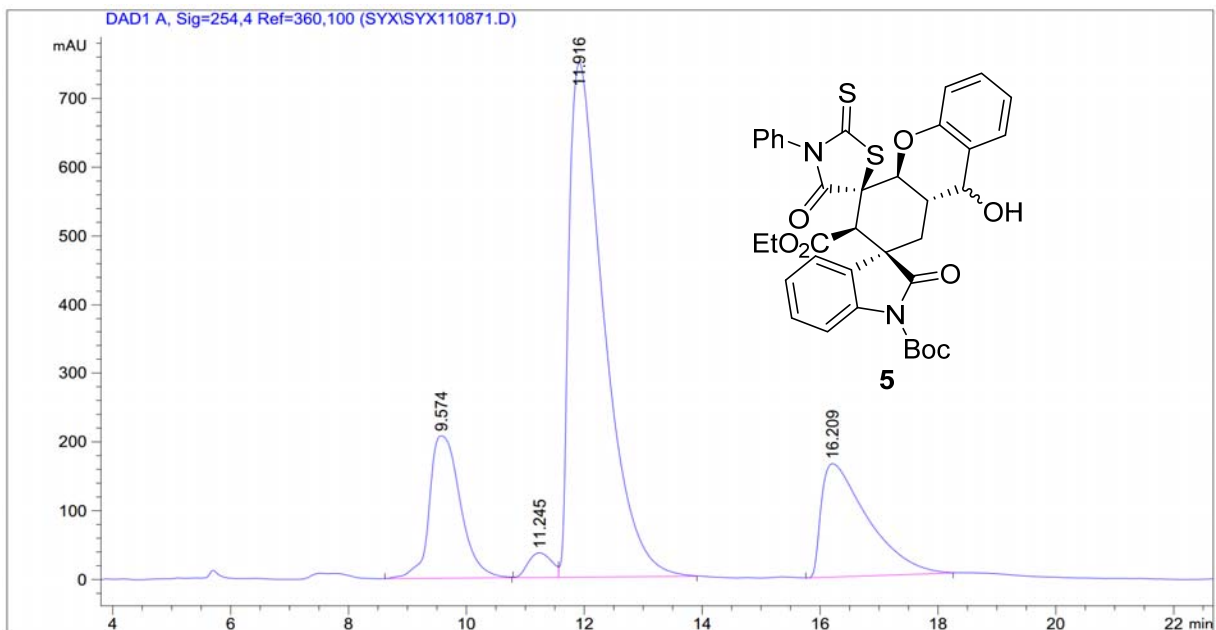

| Peak # | RetTime [min] | Type | Width [min] | Area [mAU*s] | Height [mAU] | Area %  |
|--------|---------------|------|-------------|--------------|--------------|---------|
| 1      | 9.574         | BB   | 0.5671      | 7538.98535   | 206.92812    | 15.6354 |
| 2      | 11.245        | BV   | 0.4520      | 987.40973    | 35.77127     | 2.0478  |
| 3      | 11.916        | VB   | 0.6025      | 3.06845e4    | 748.13361    | 63.6377 |
| 4      | 16.209        | VB   | 0.7636      | 9006.57129   | 164.80785    | 18.6791 |
